# Supplementary material for: Genome Wide DNA Methylation Profiles Provide Clues to the Origin and Pathogenesis of Germ Cell Tumors
Source: PubMed Central journal article supplement (PMC4479500; doi:10.1371/journal.pone.0122146), 2015-04-10

# GRB10, GB10 - Paternal\_chr7-50849753-50850871

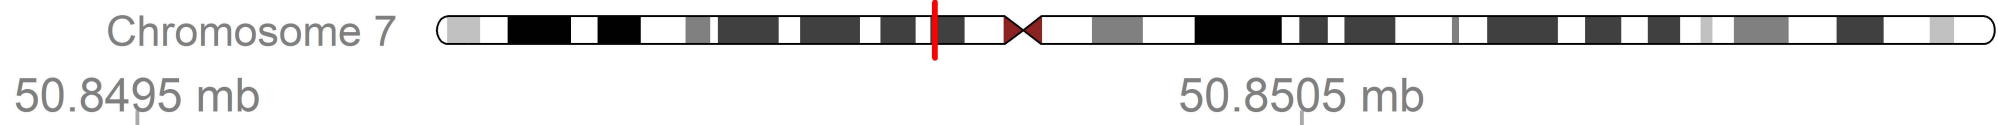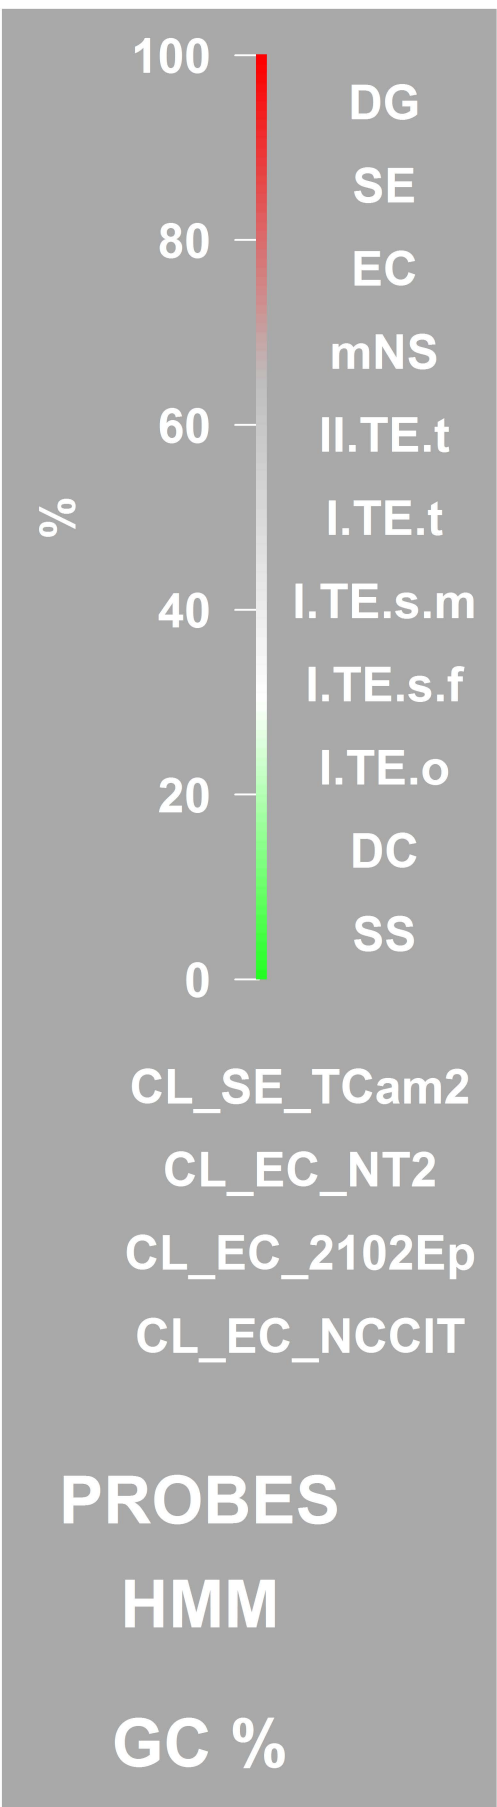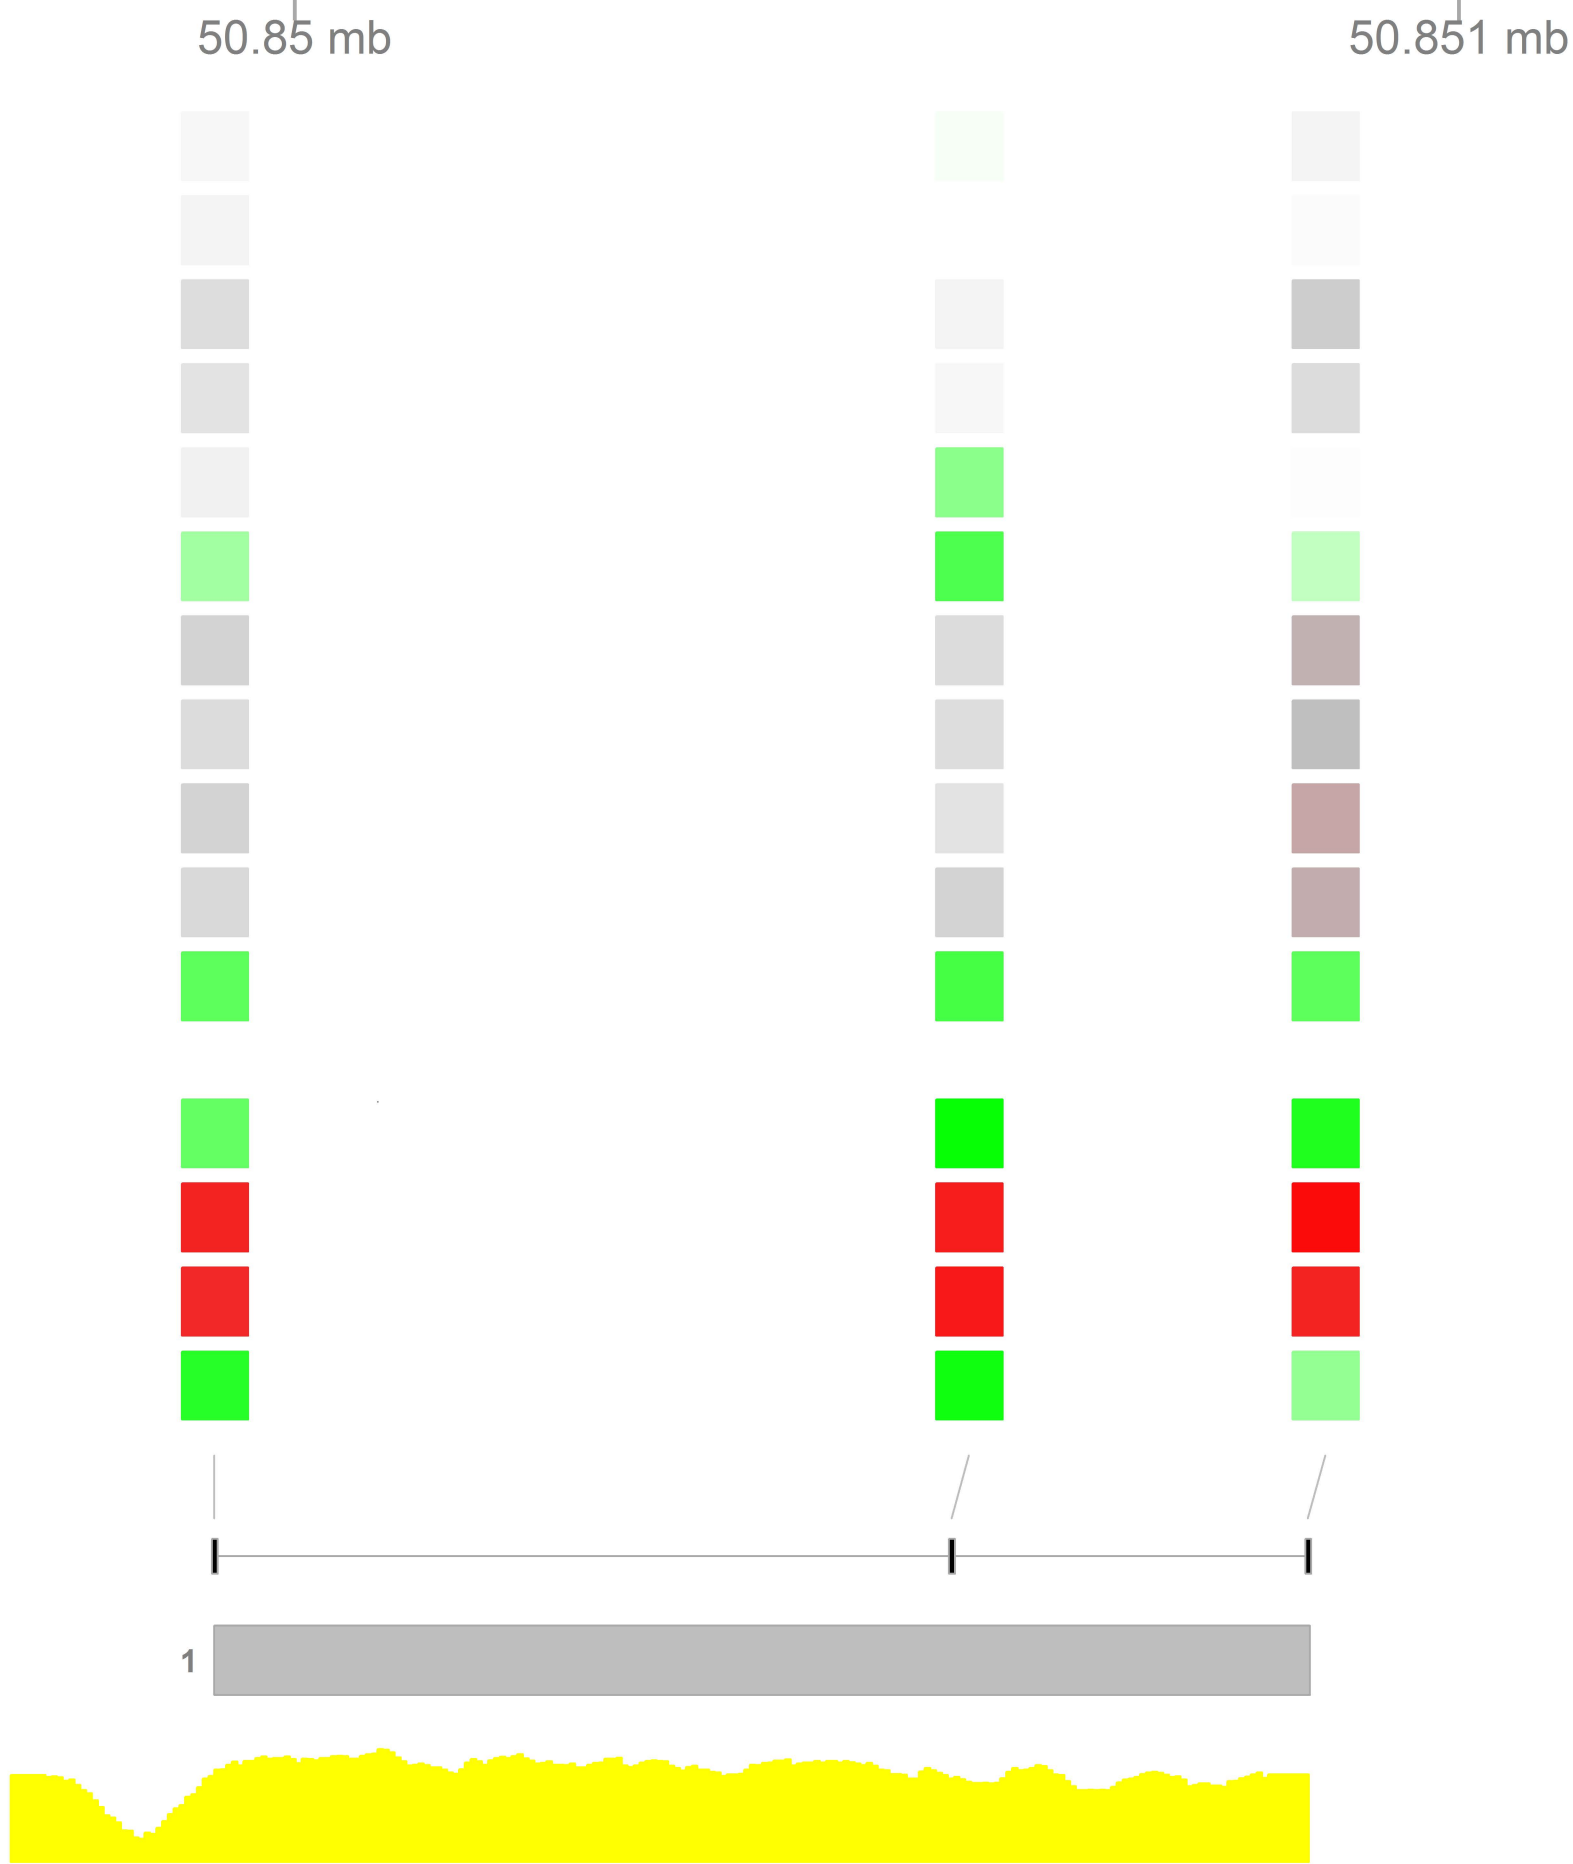

# H19\_IGF2 - Maternal\_chr11-2019368-2019728

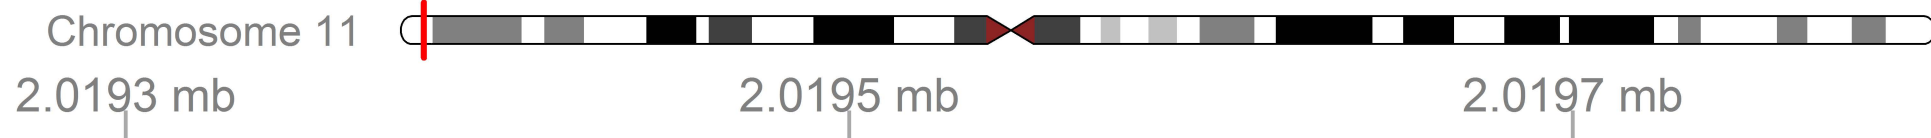

2.0194 mb

2.0196 mb

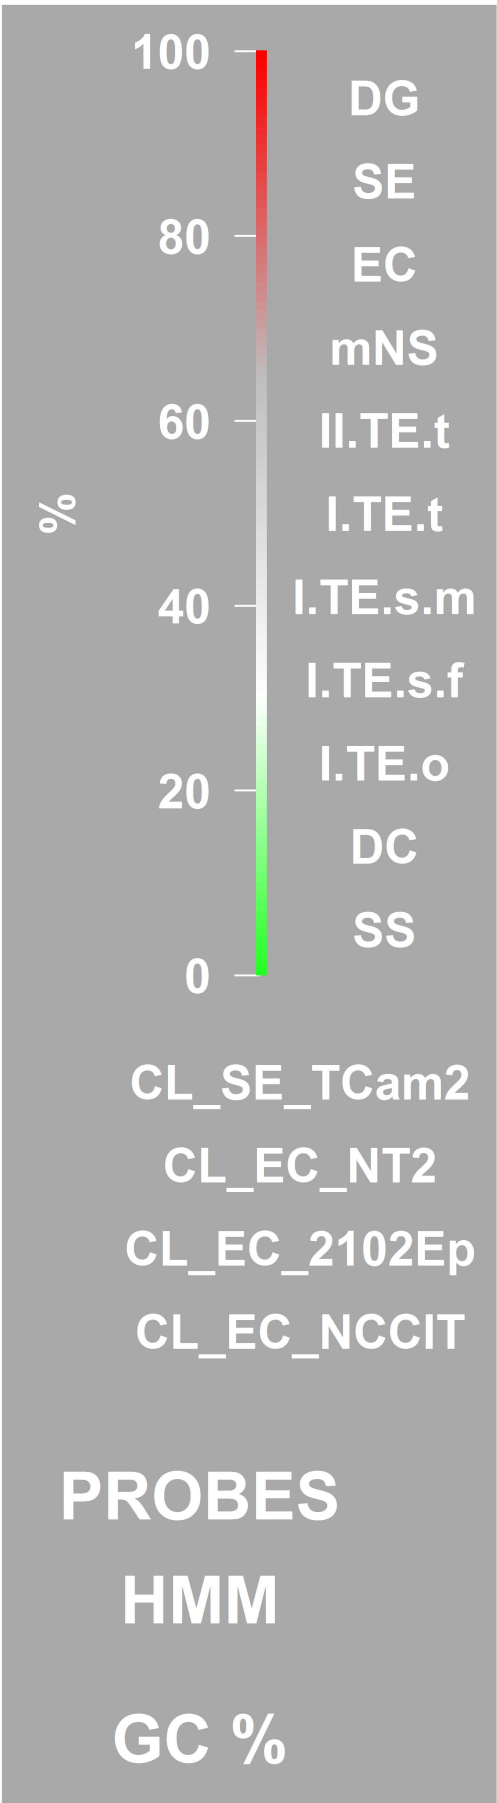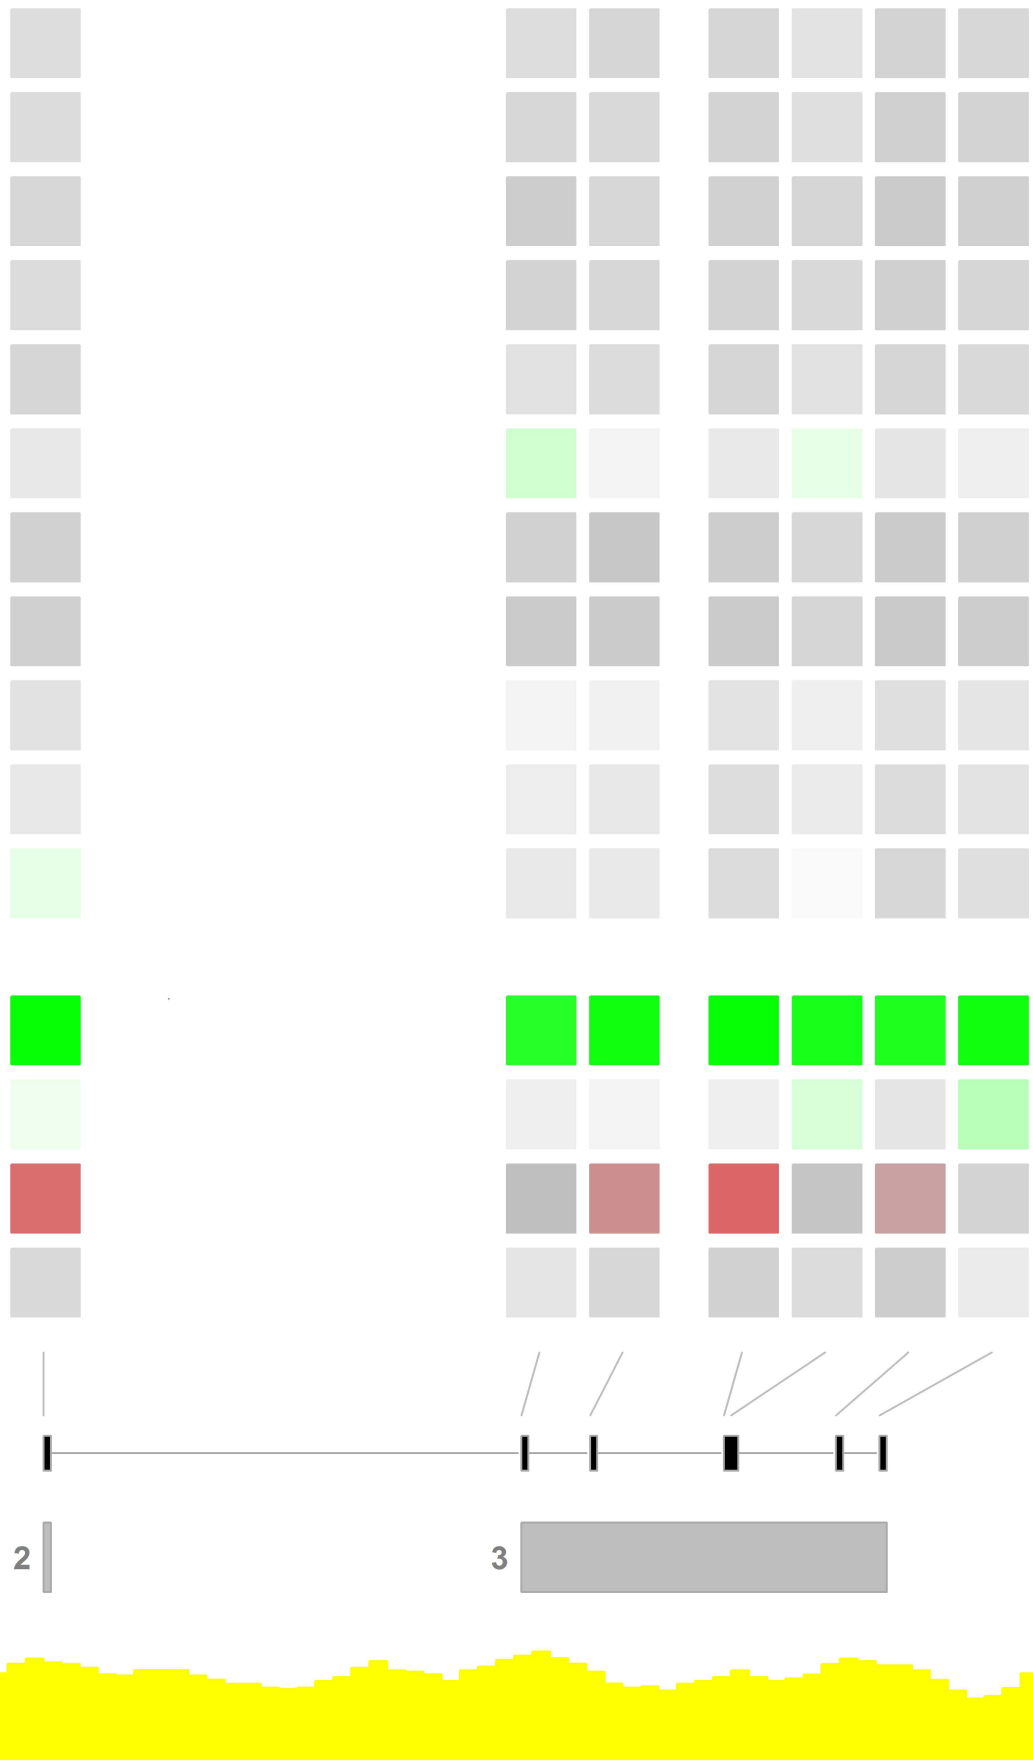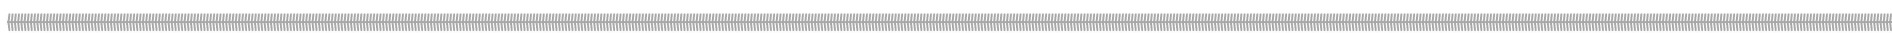

# H19\_IGF2, IGF\_H19.ICR - Maternal\_chr11-2020834-2023499

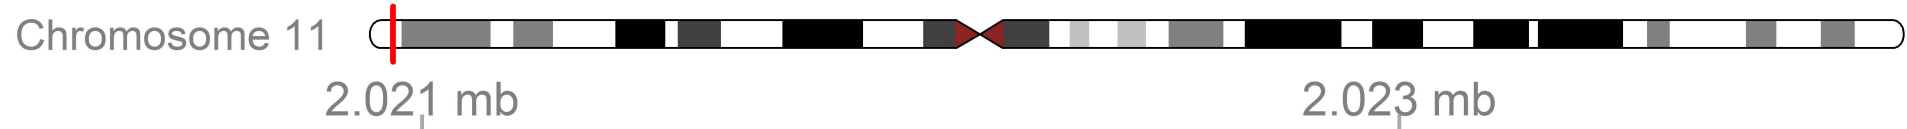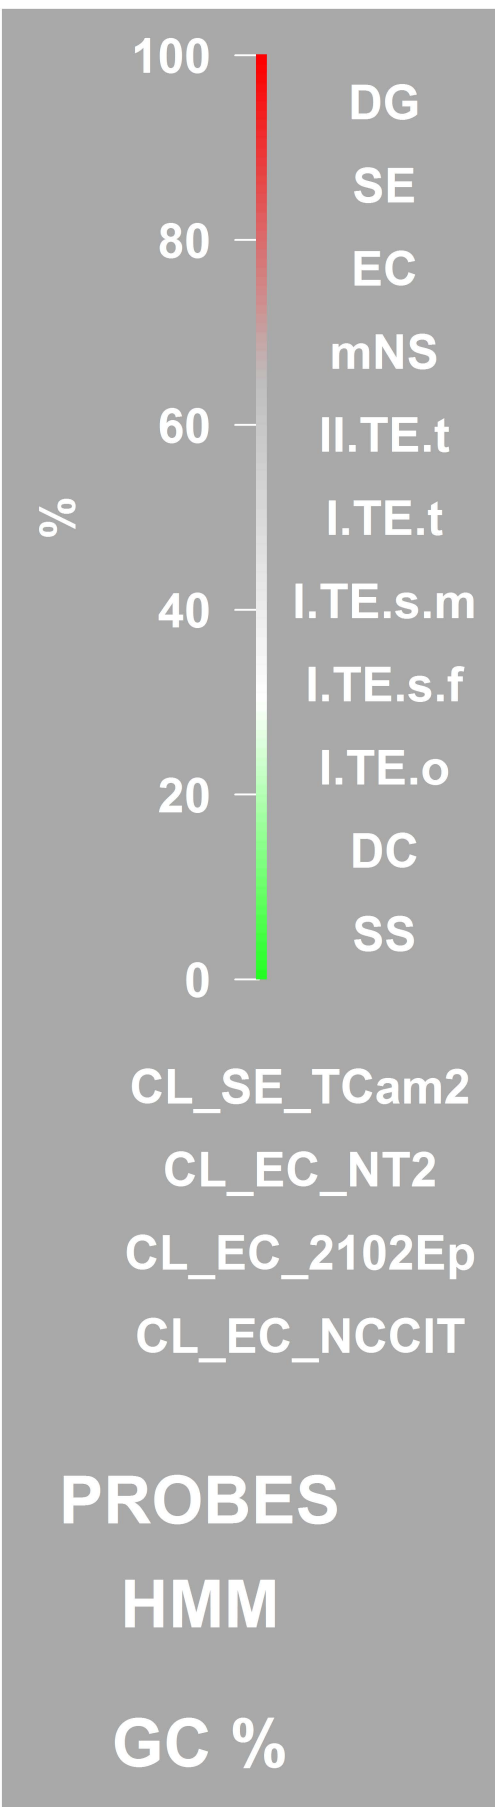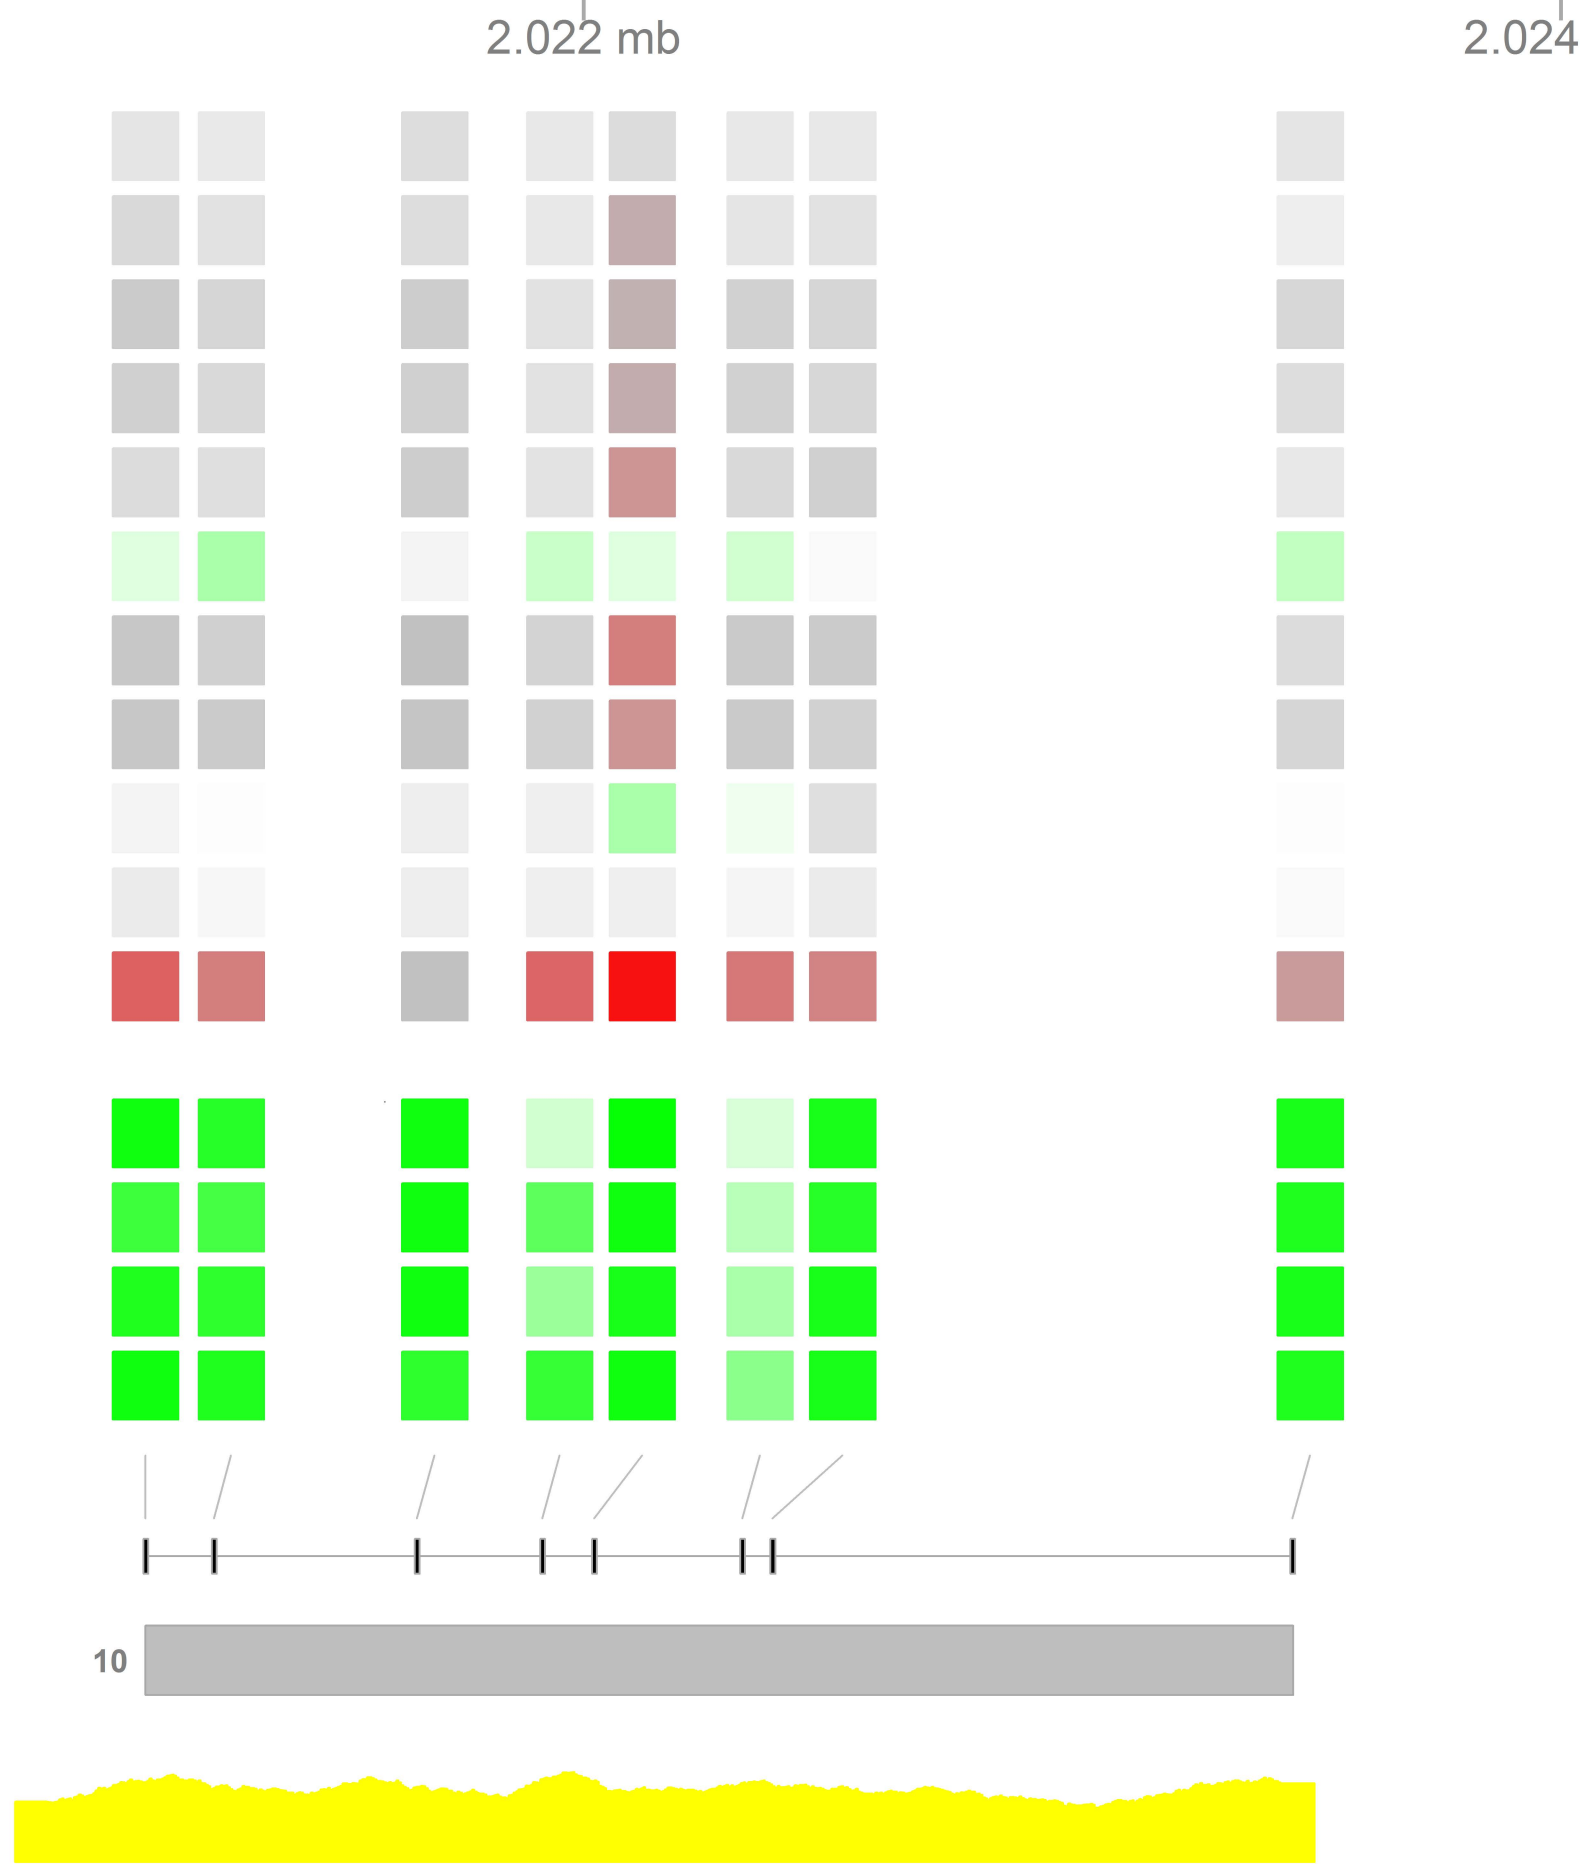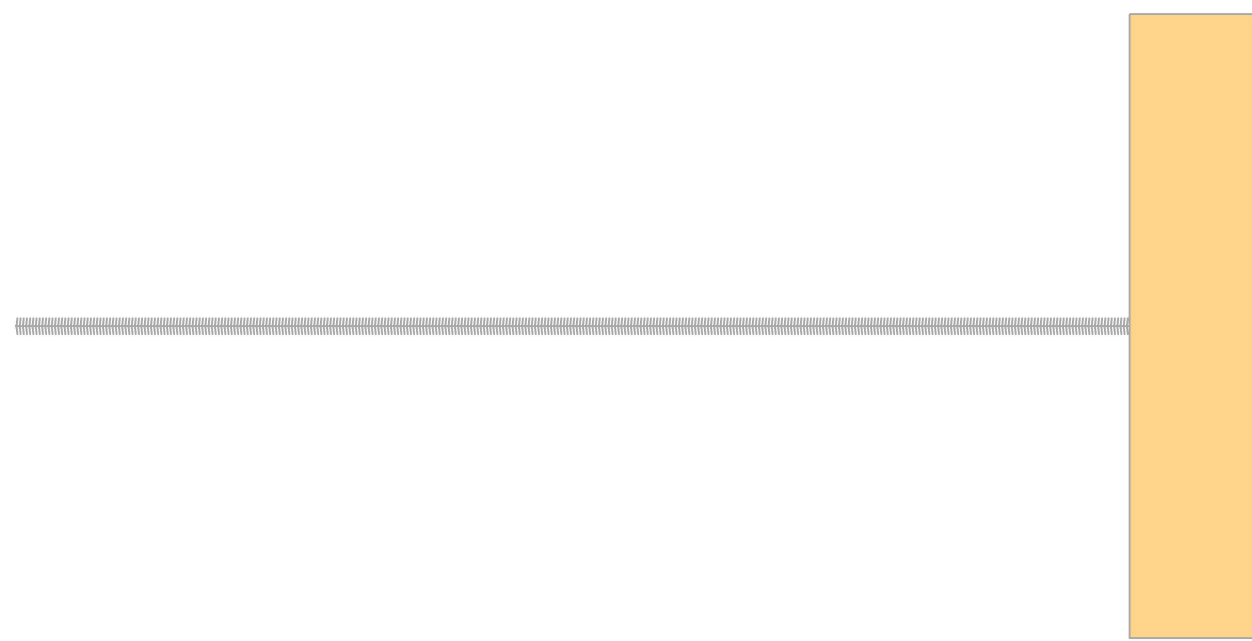

# IGF2.DMR2 - Paternal\_chr11-2154283-2154956

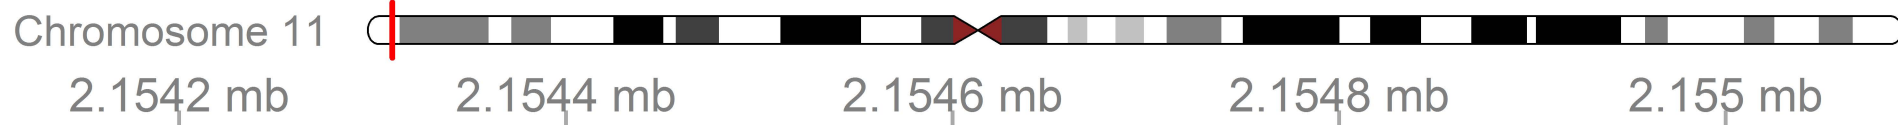

2.1543 mb      2.1545 mb      2.1547 mb      2.1549 mb

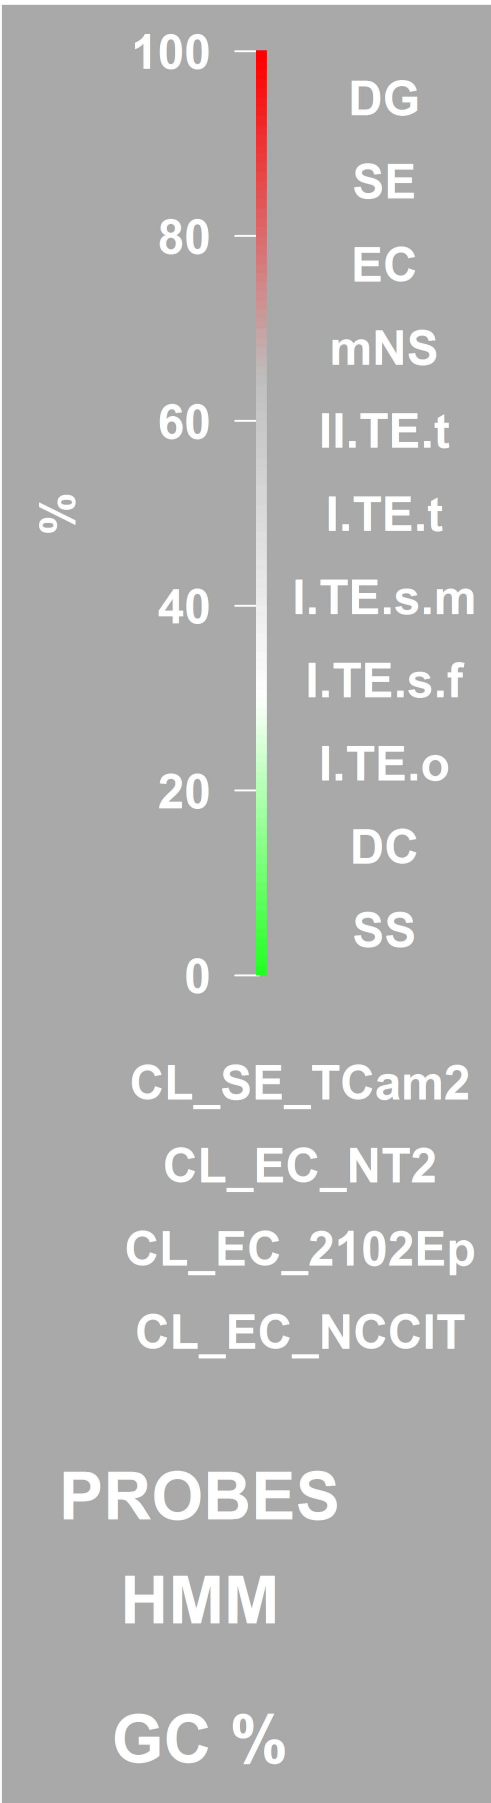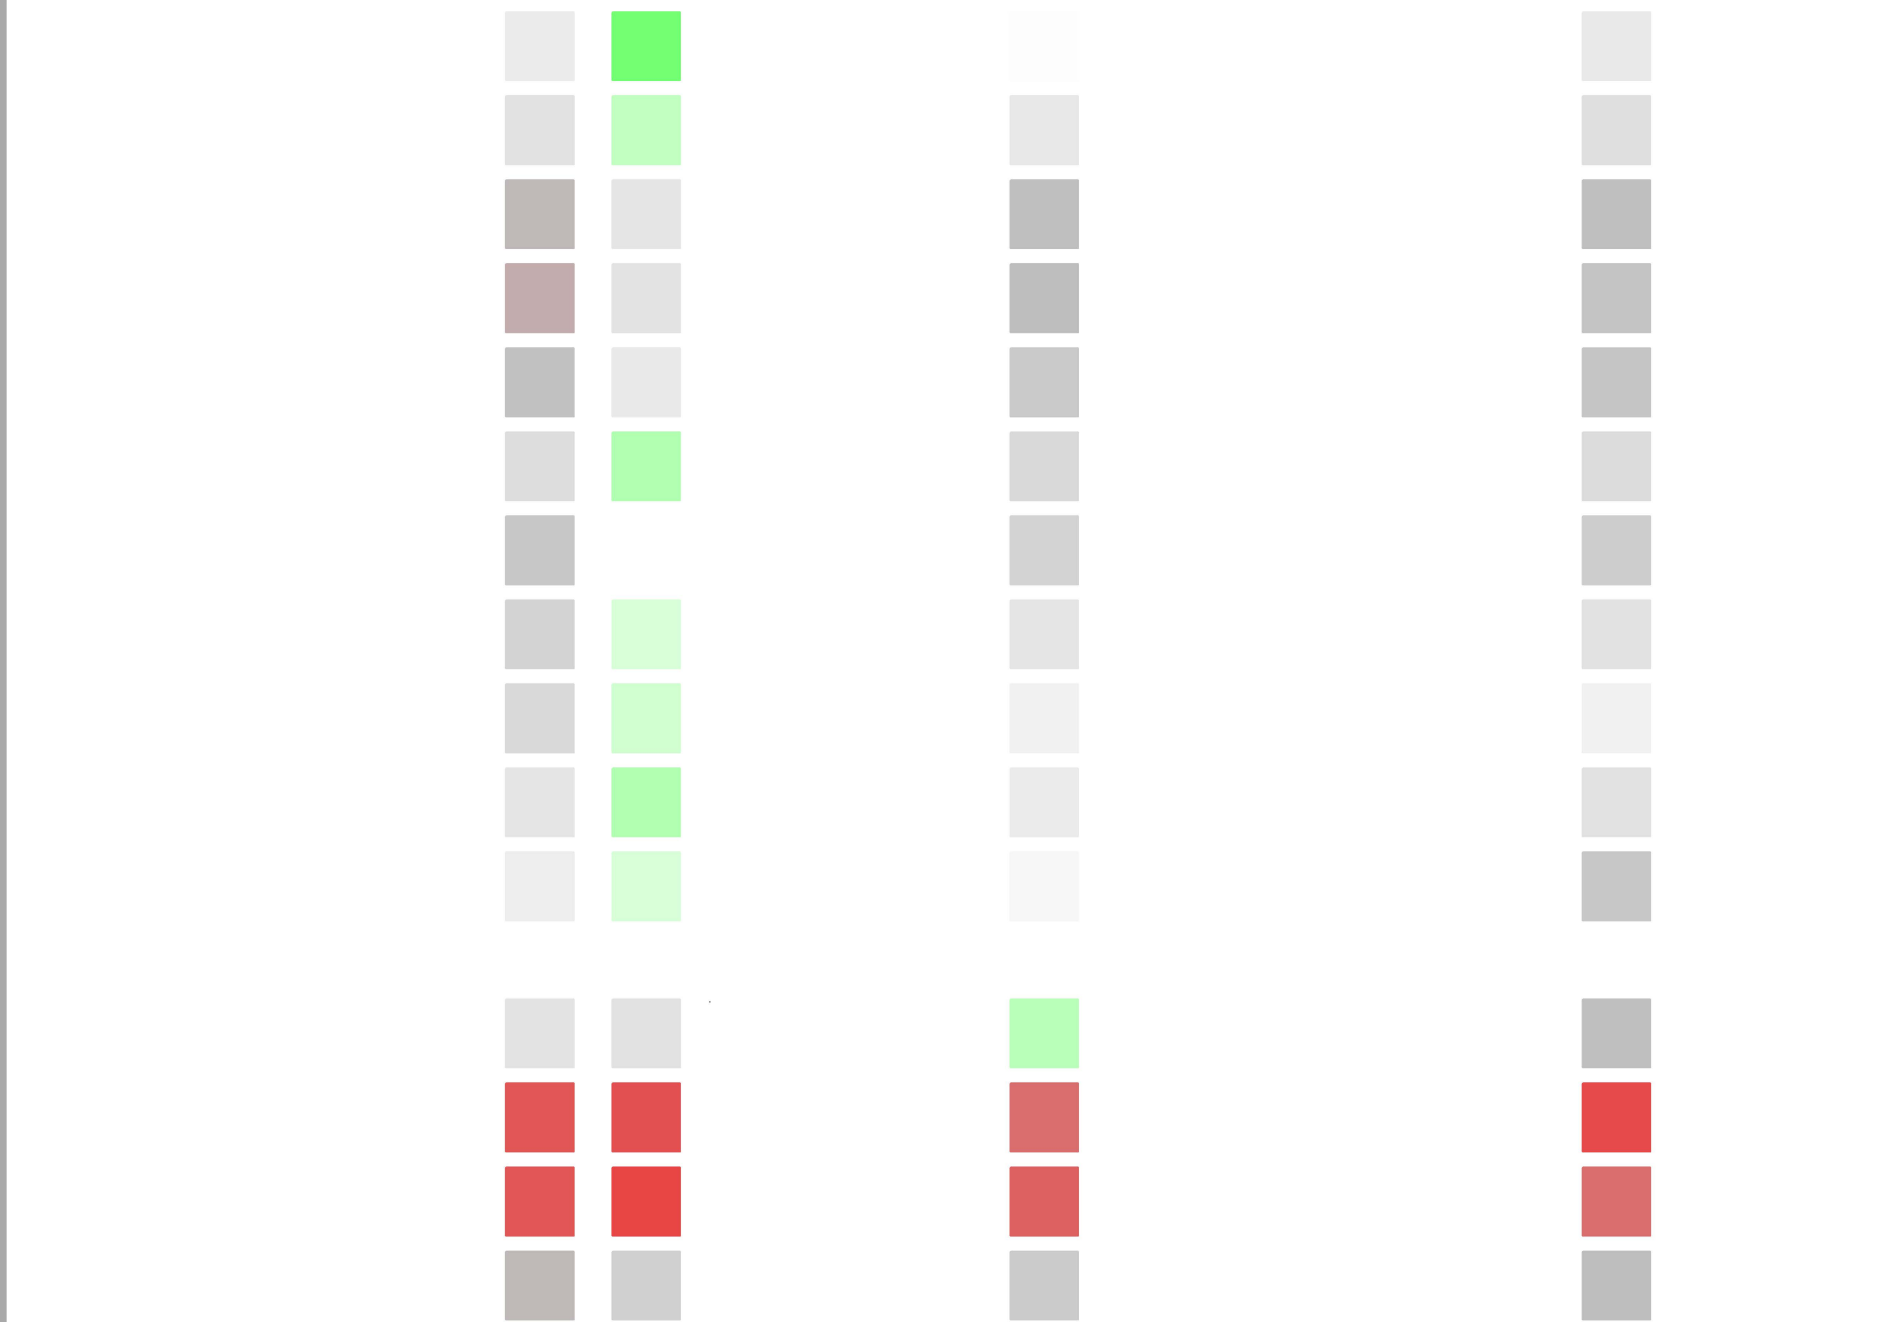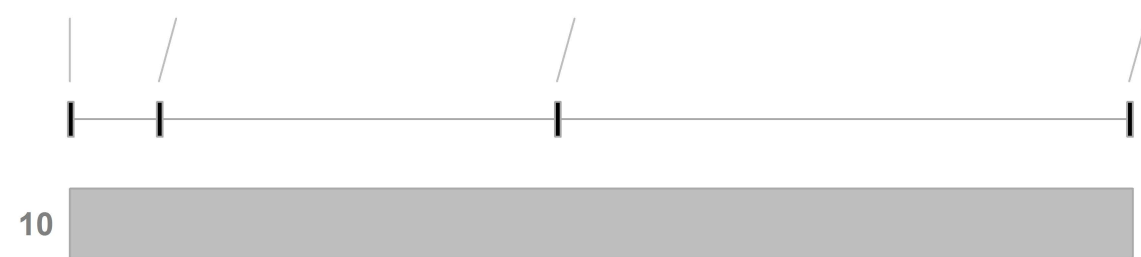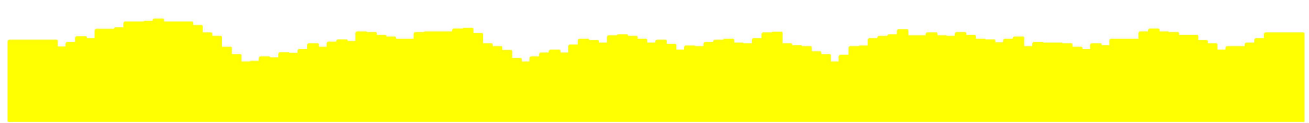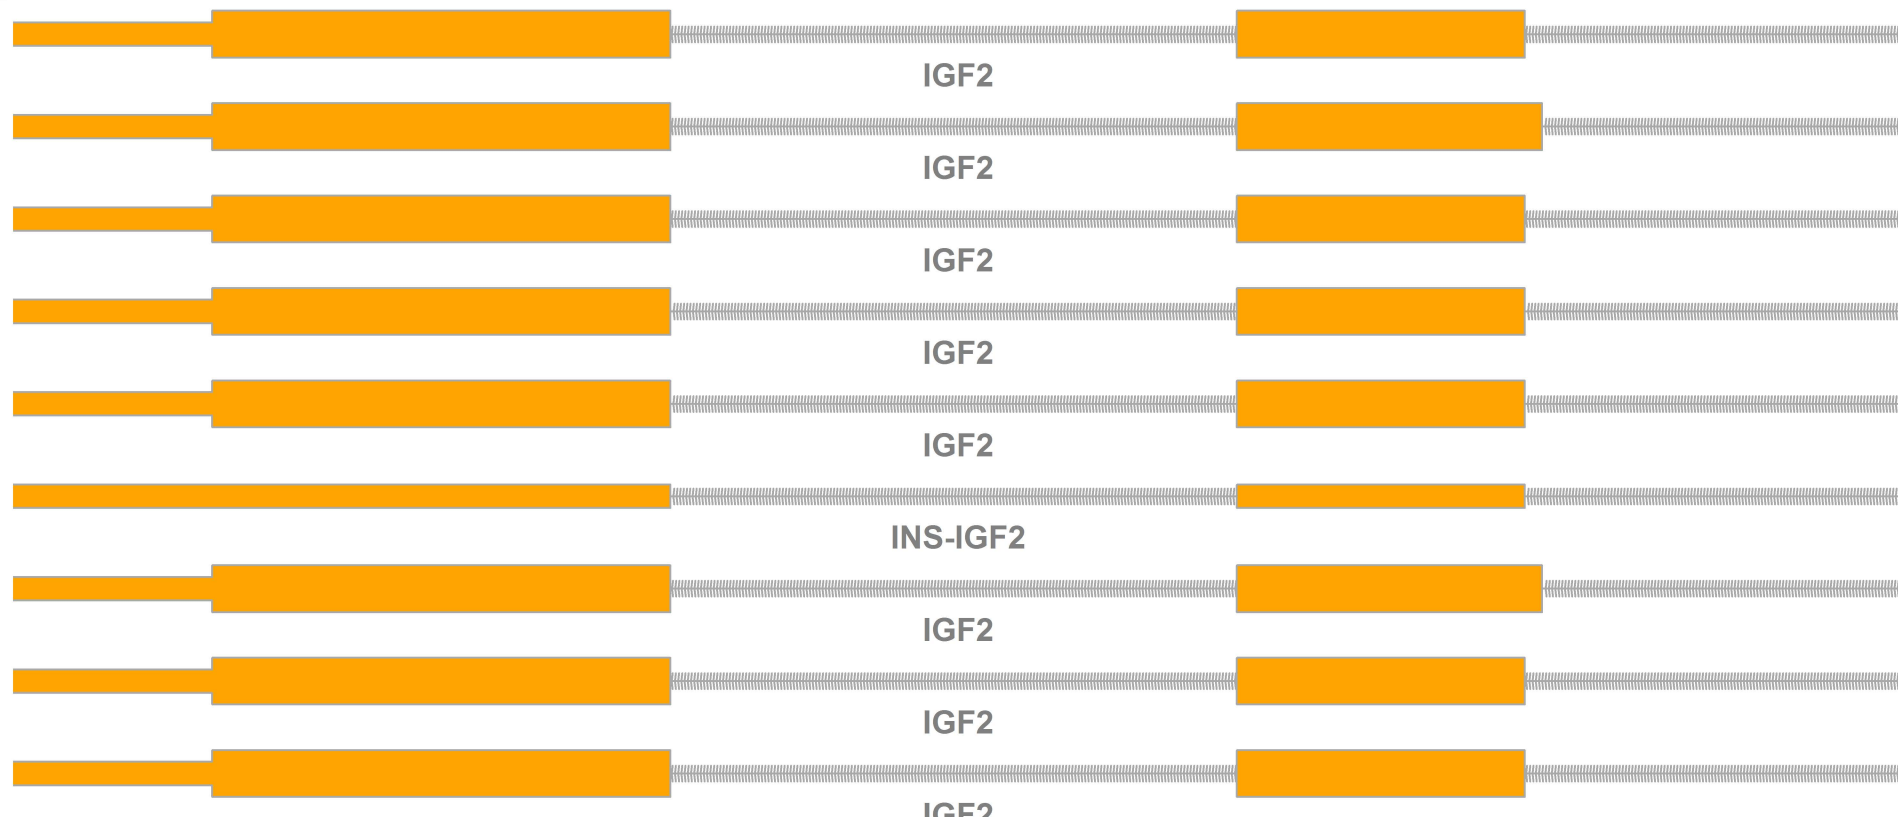



# INPP5F\_V2 - Paternal\_chr10-121577530-121578385

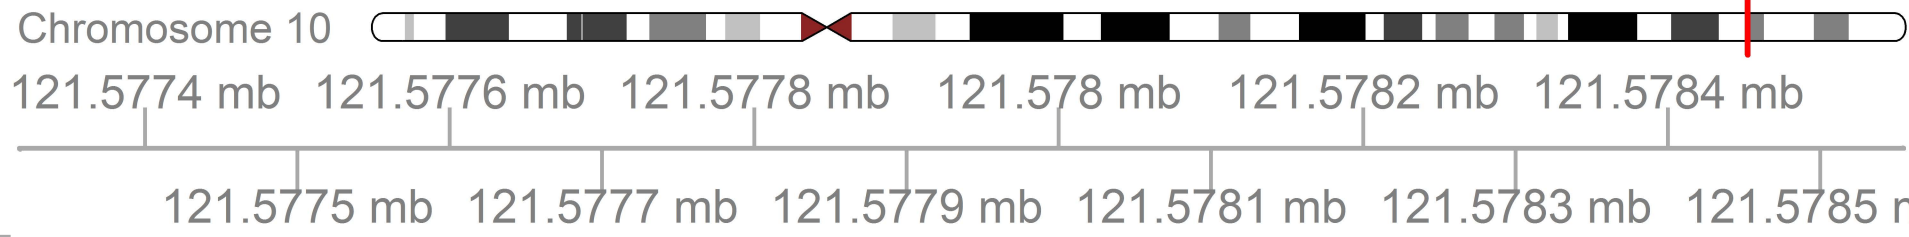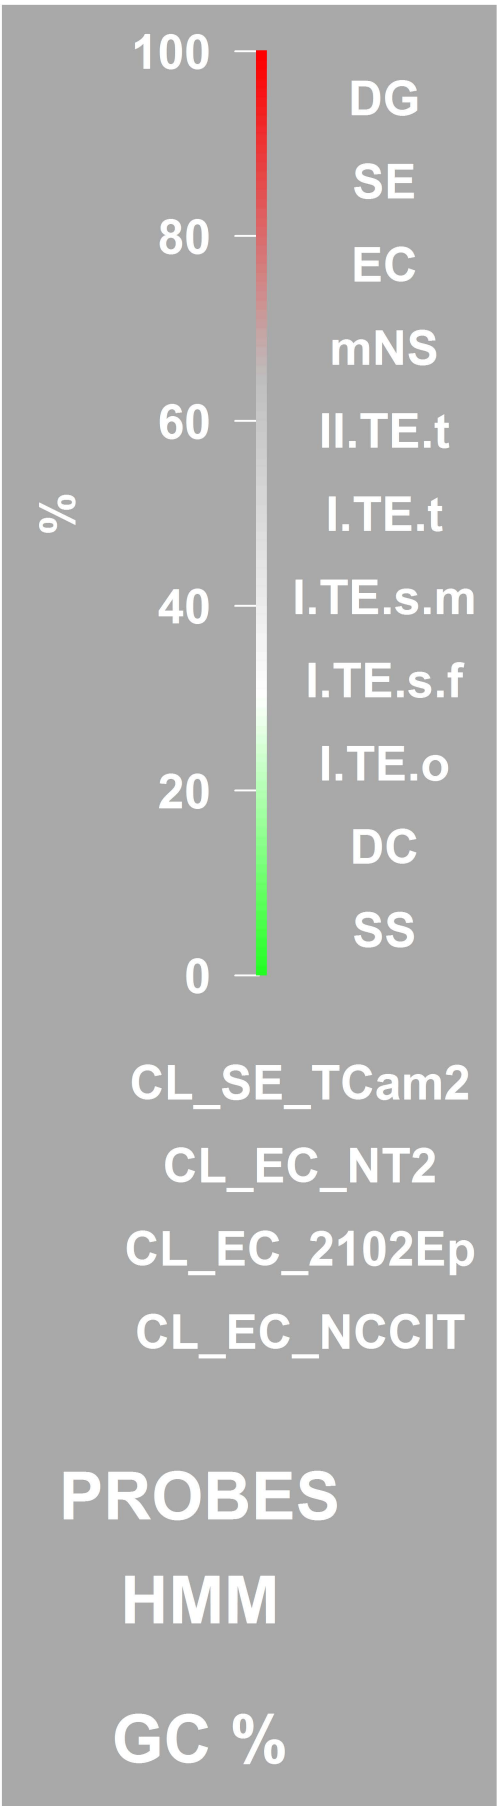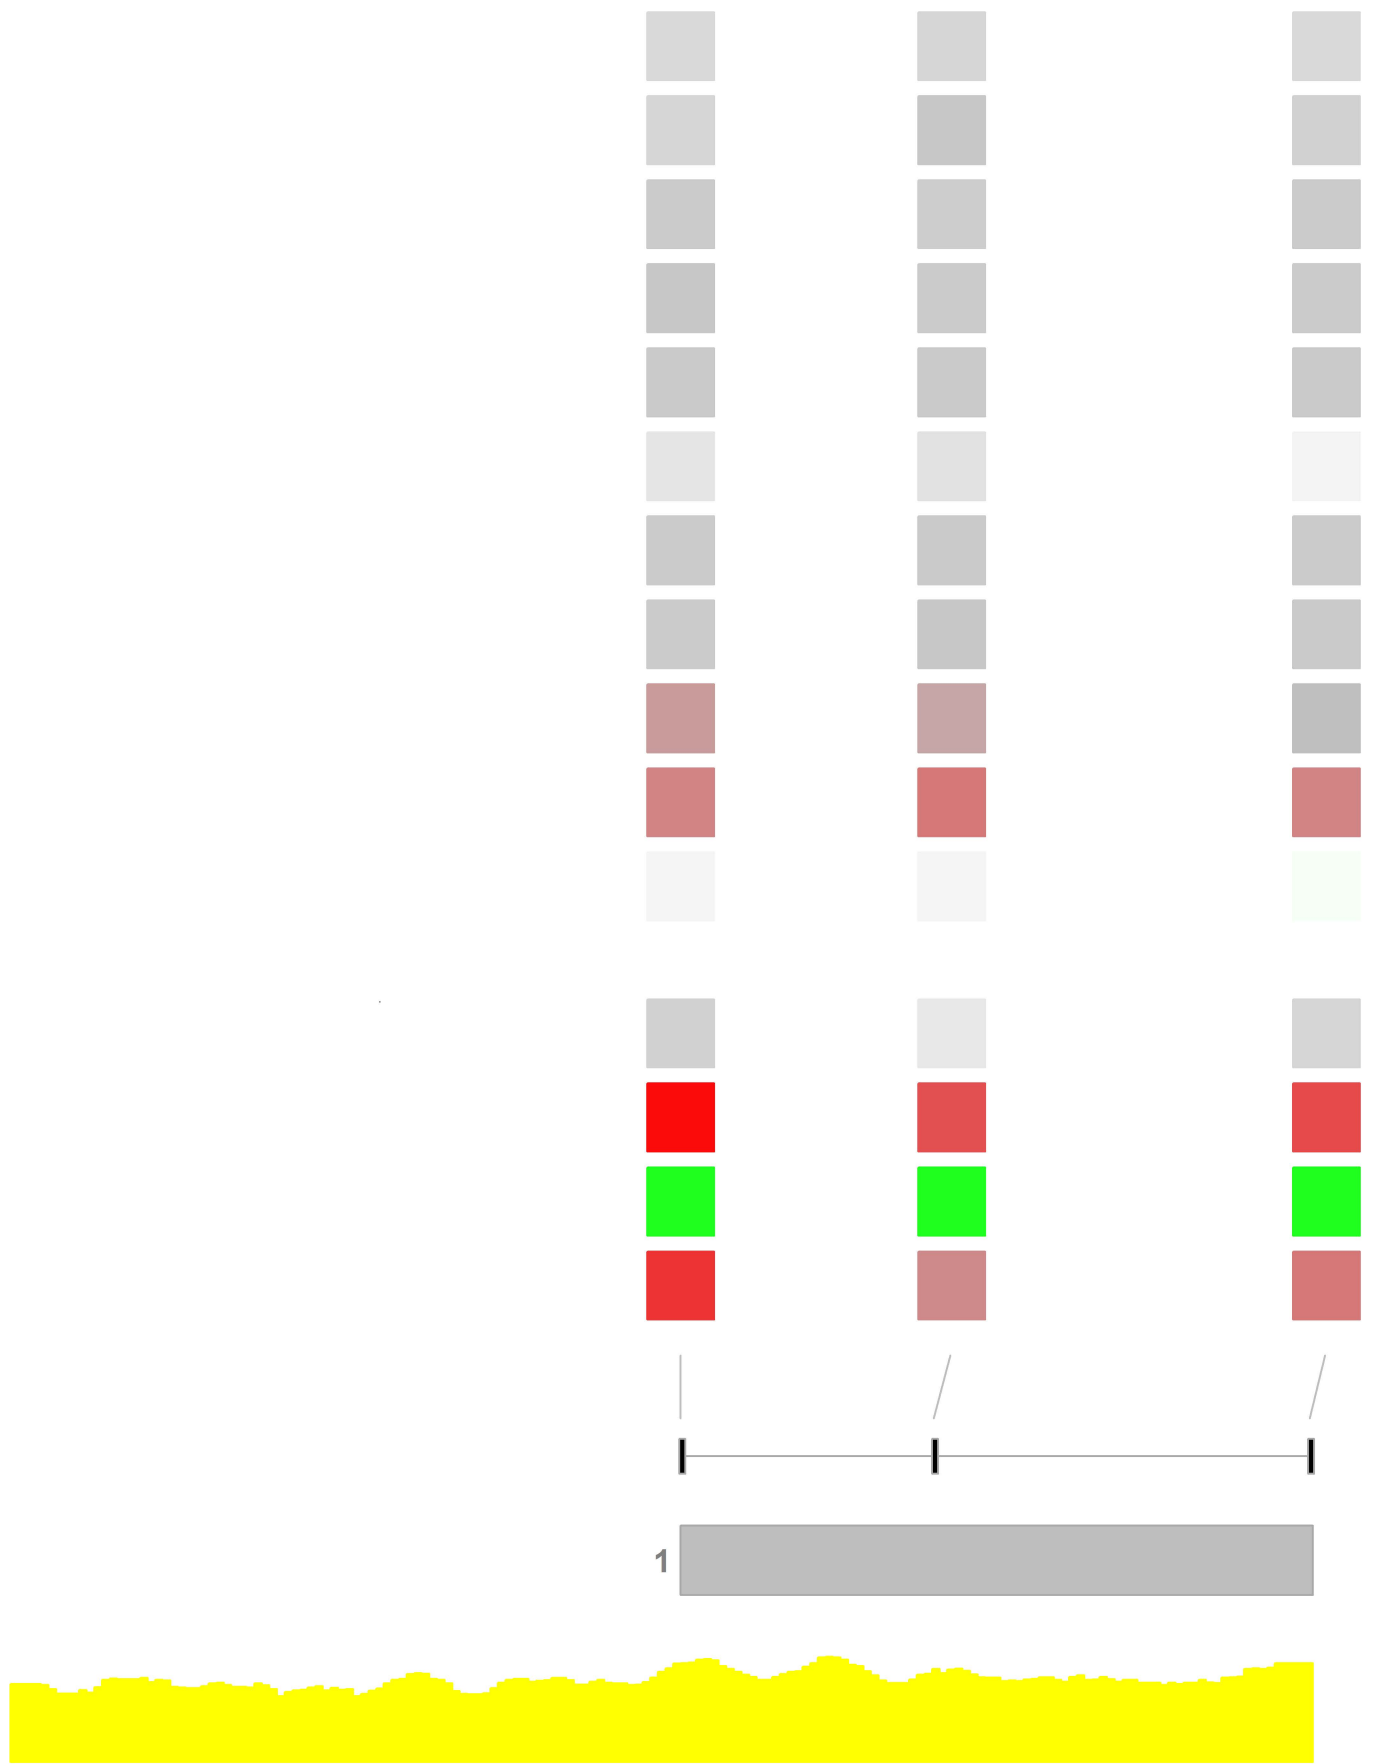

INPP5F

INPP5F

# KCNQ1OT1 - Paternal\_chr11-2720535-2722187

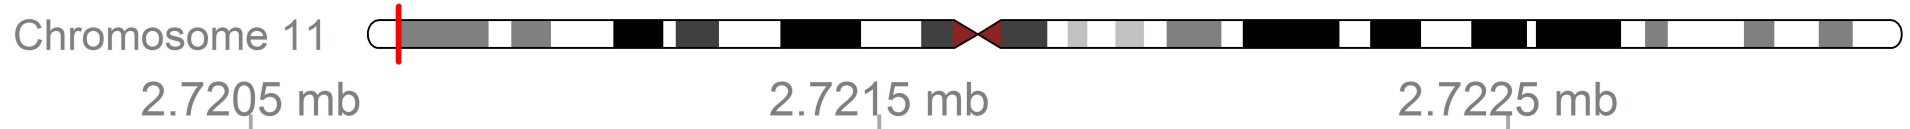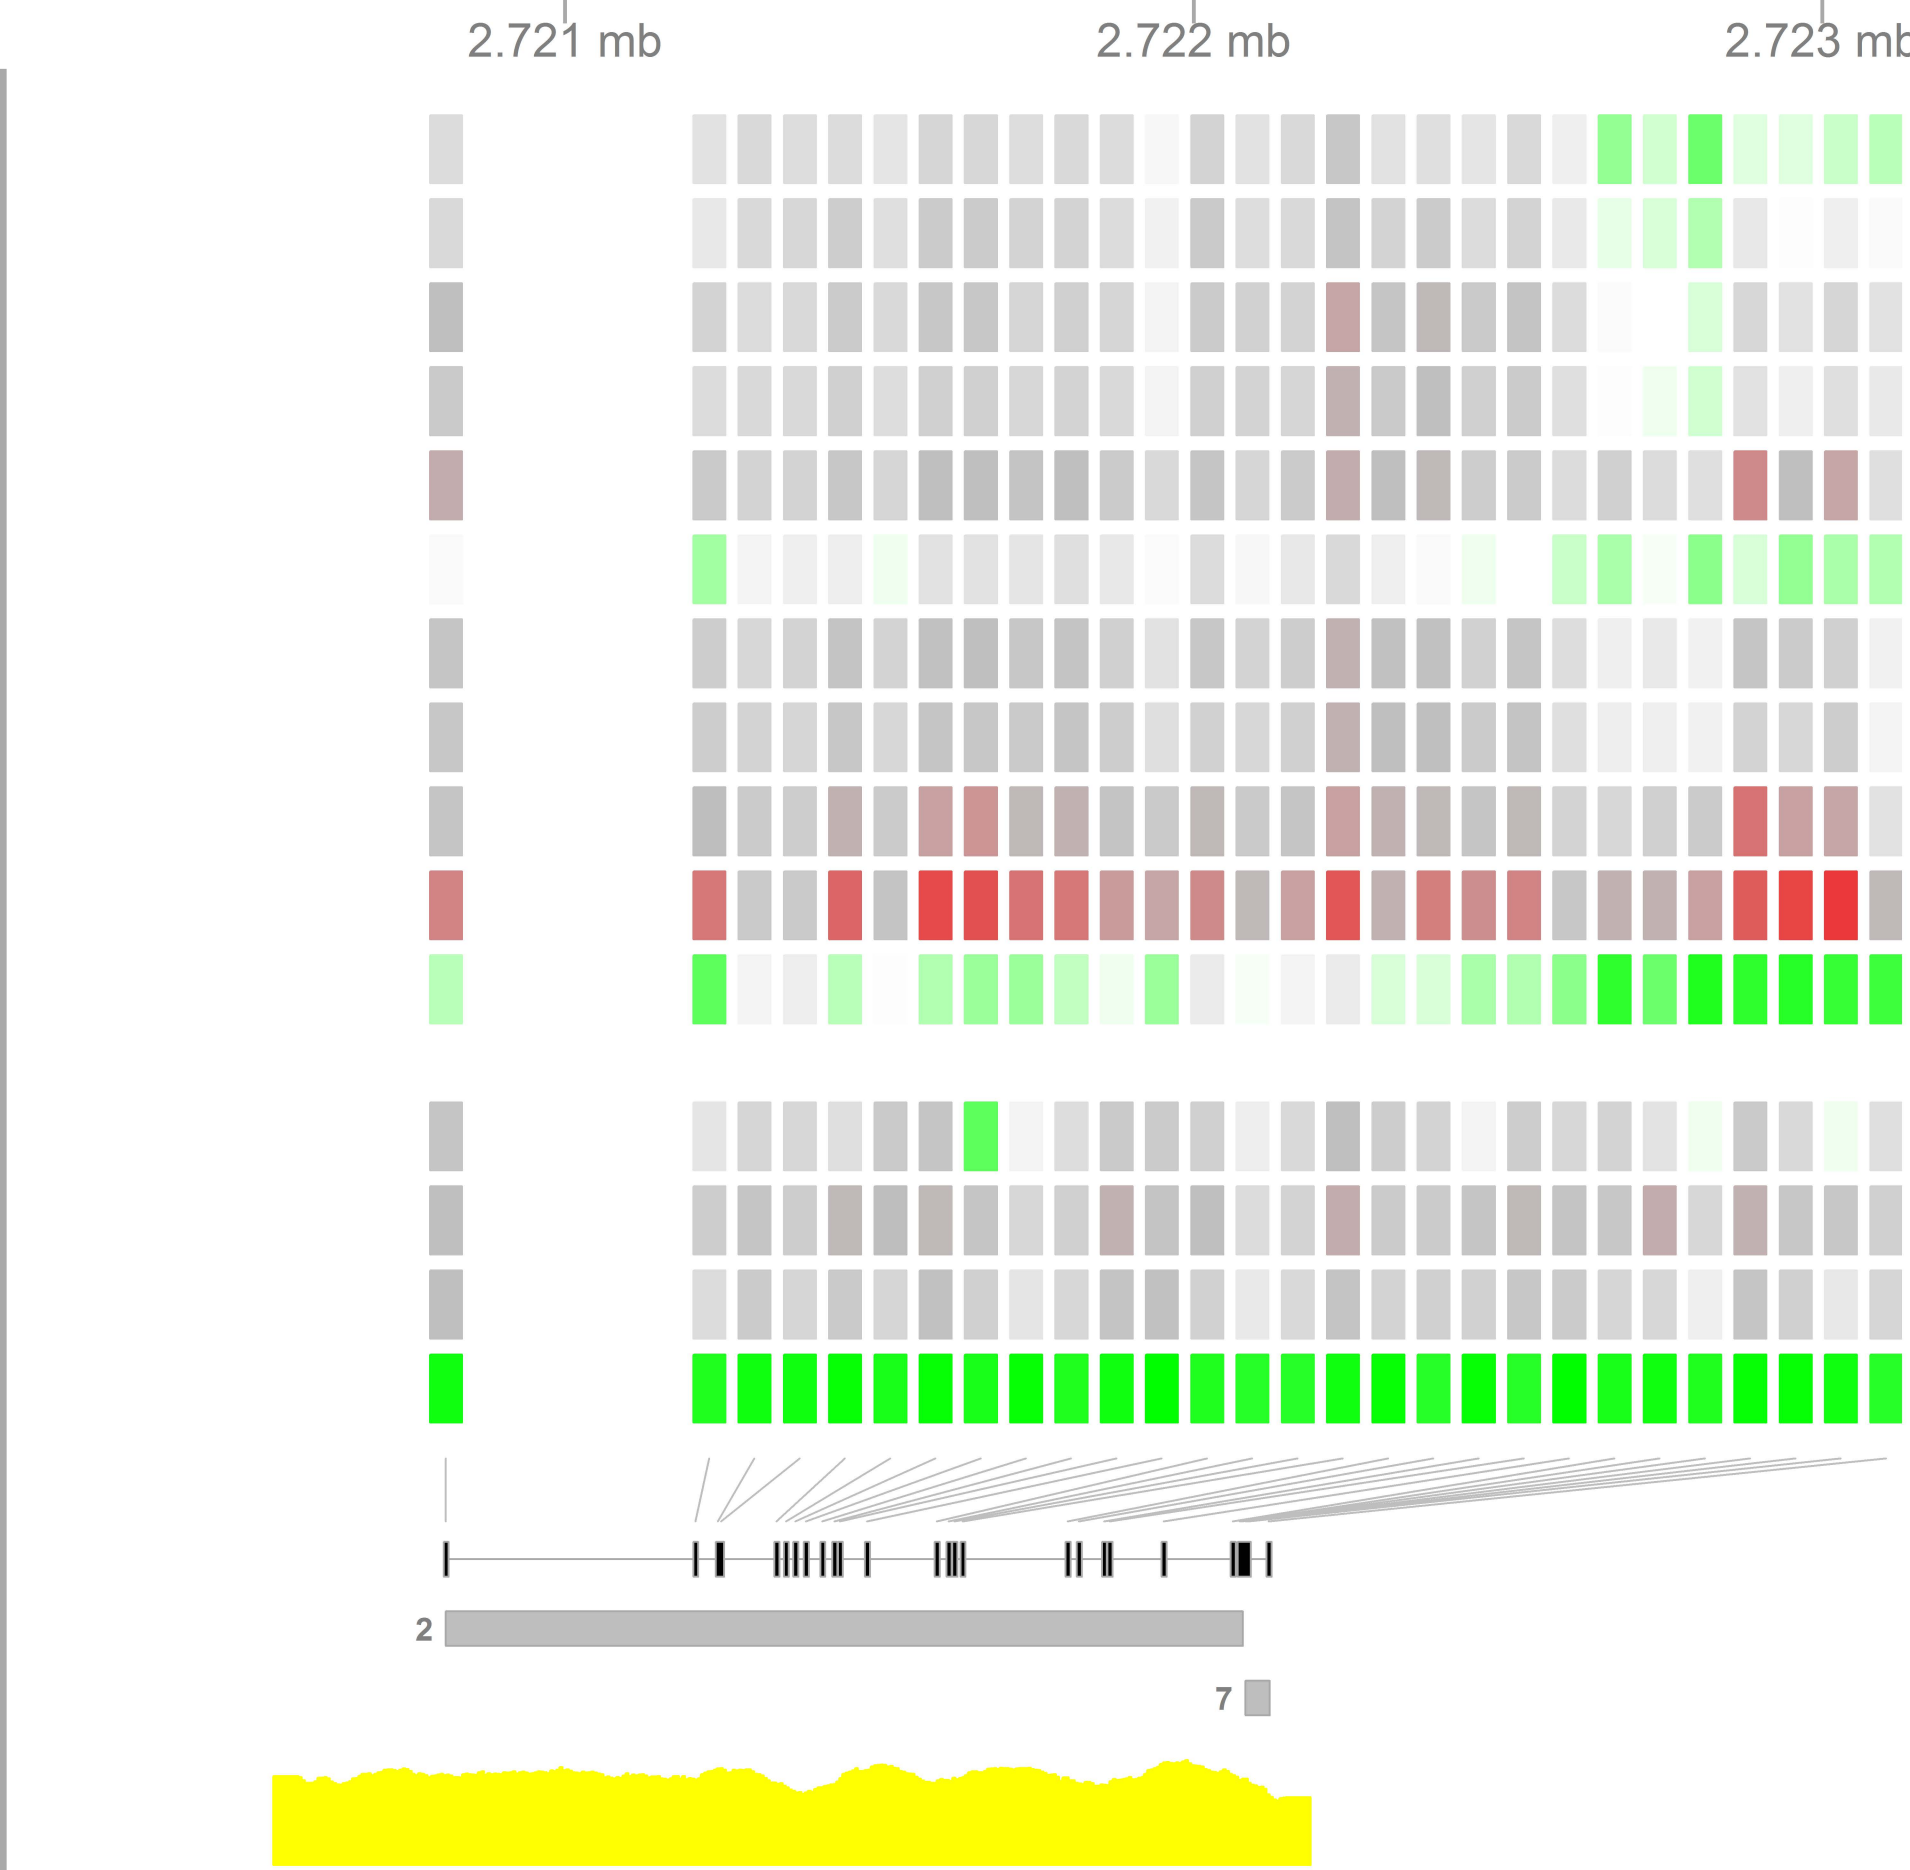



# MEG3.CpG2 - Maternal\_chr14-101290502-101290787

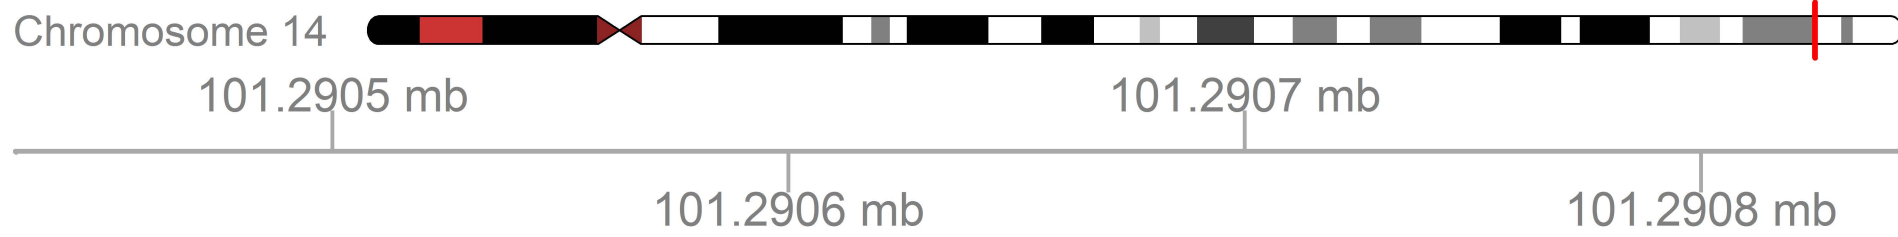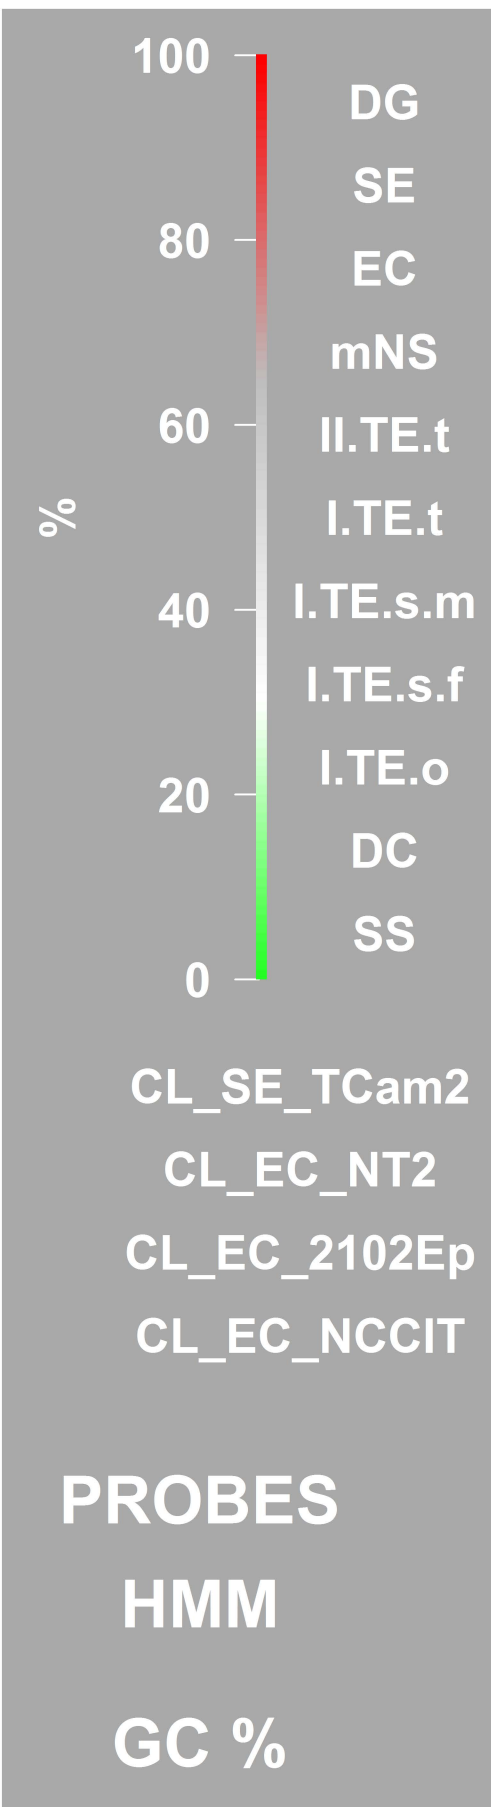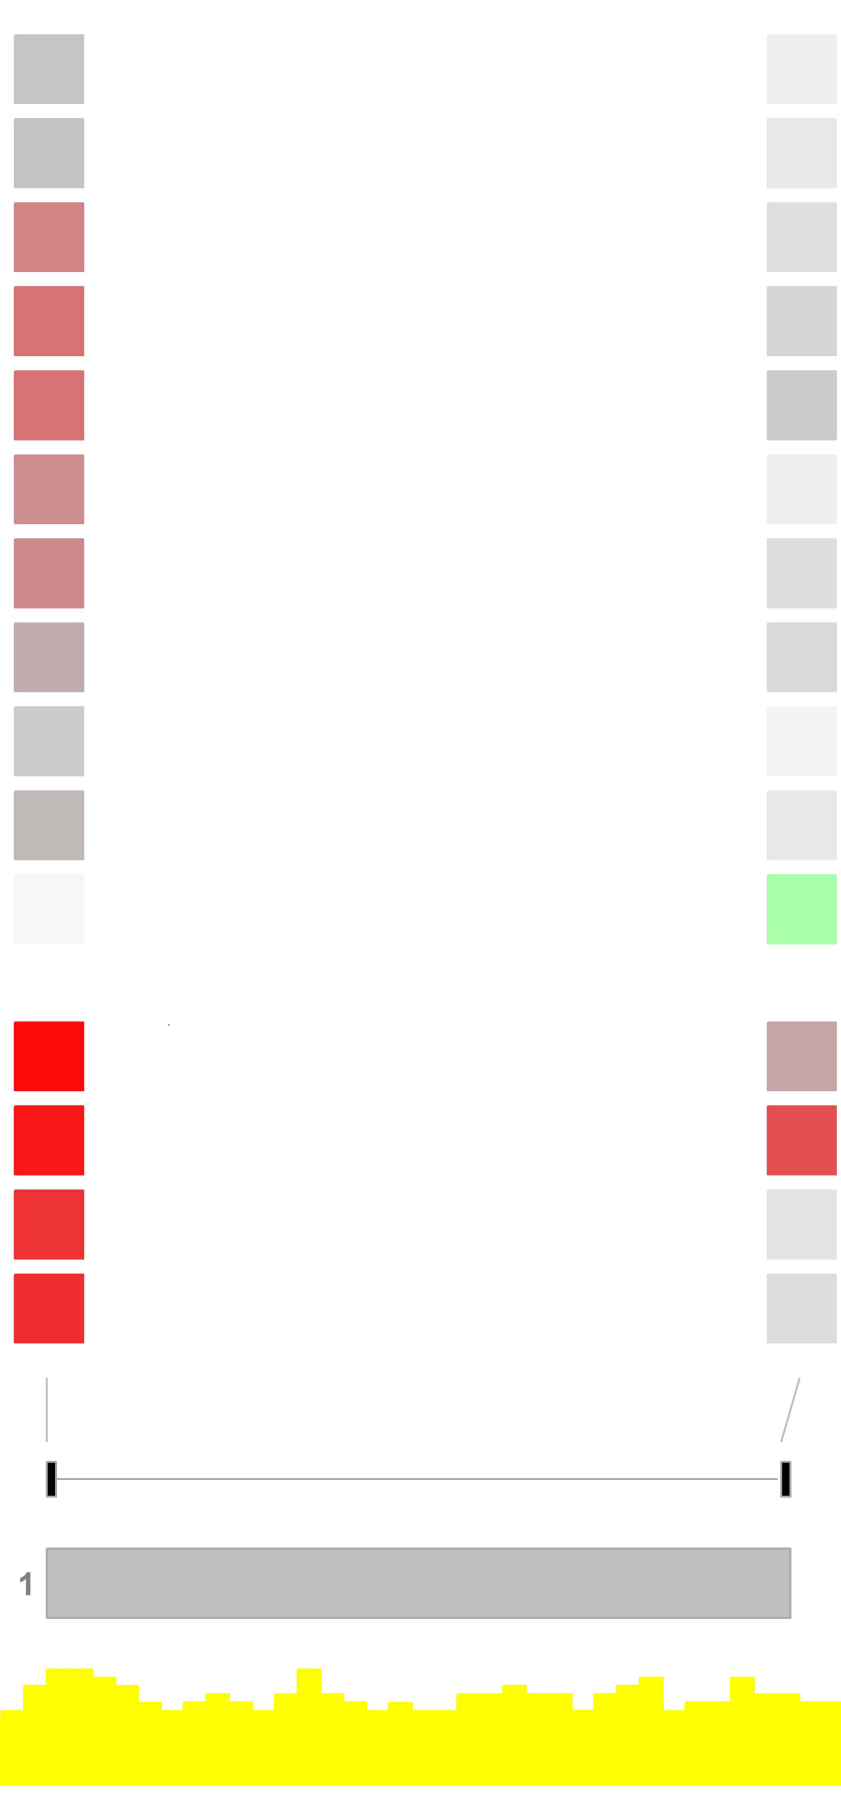

# MEG3.CTCF - Maternal\_chr14-101294222-101294655

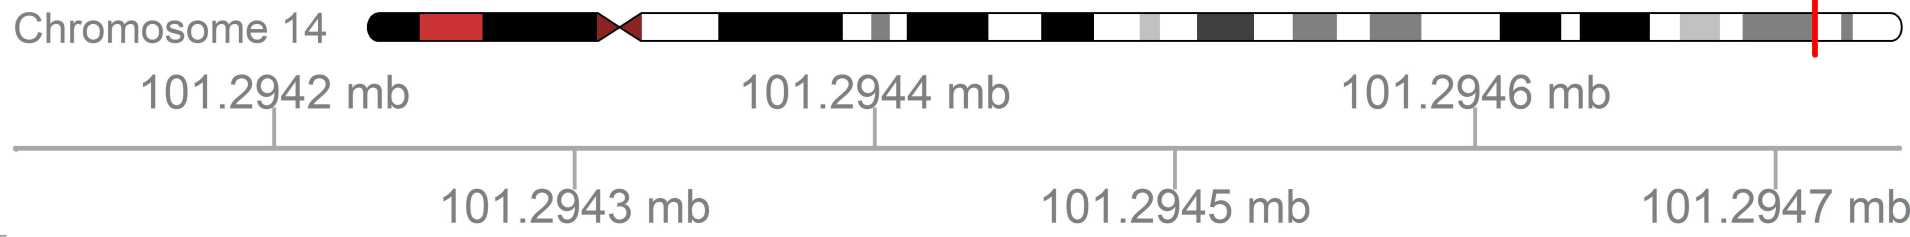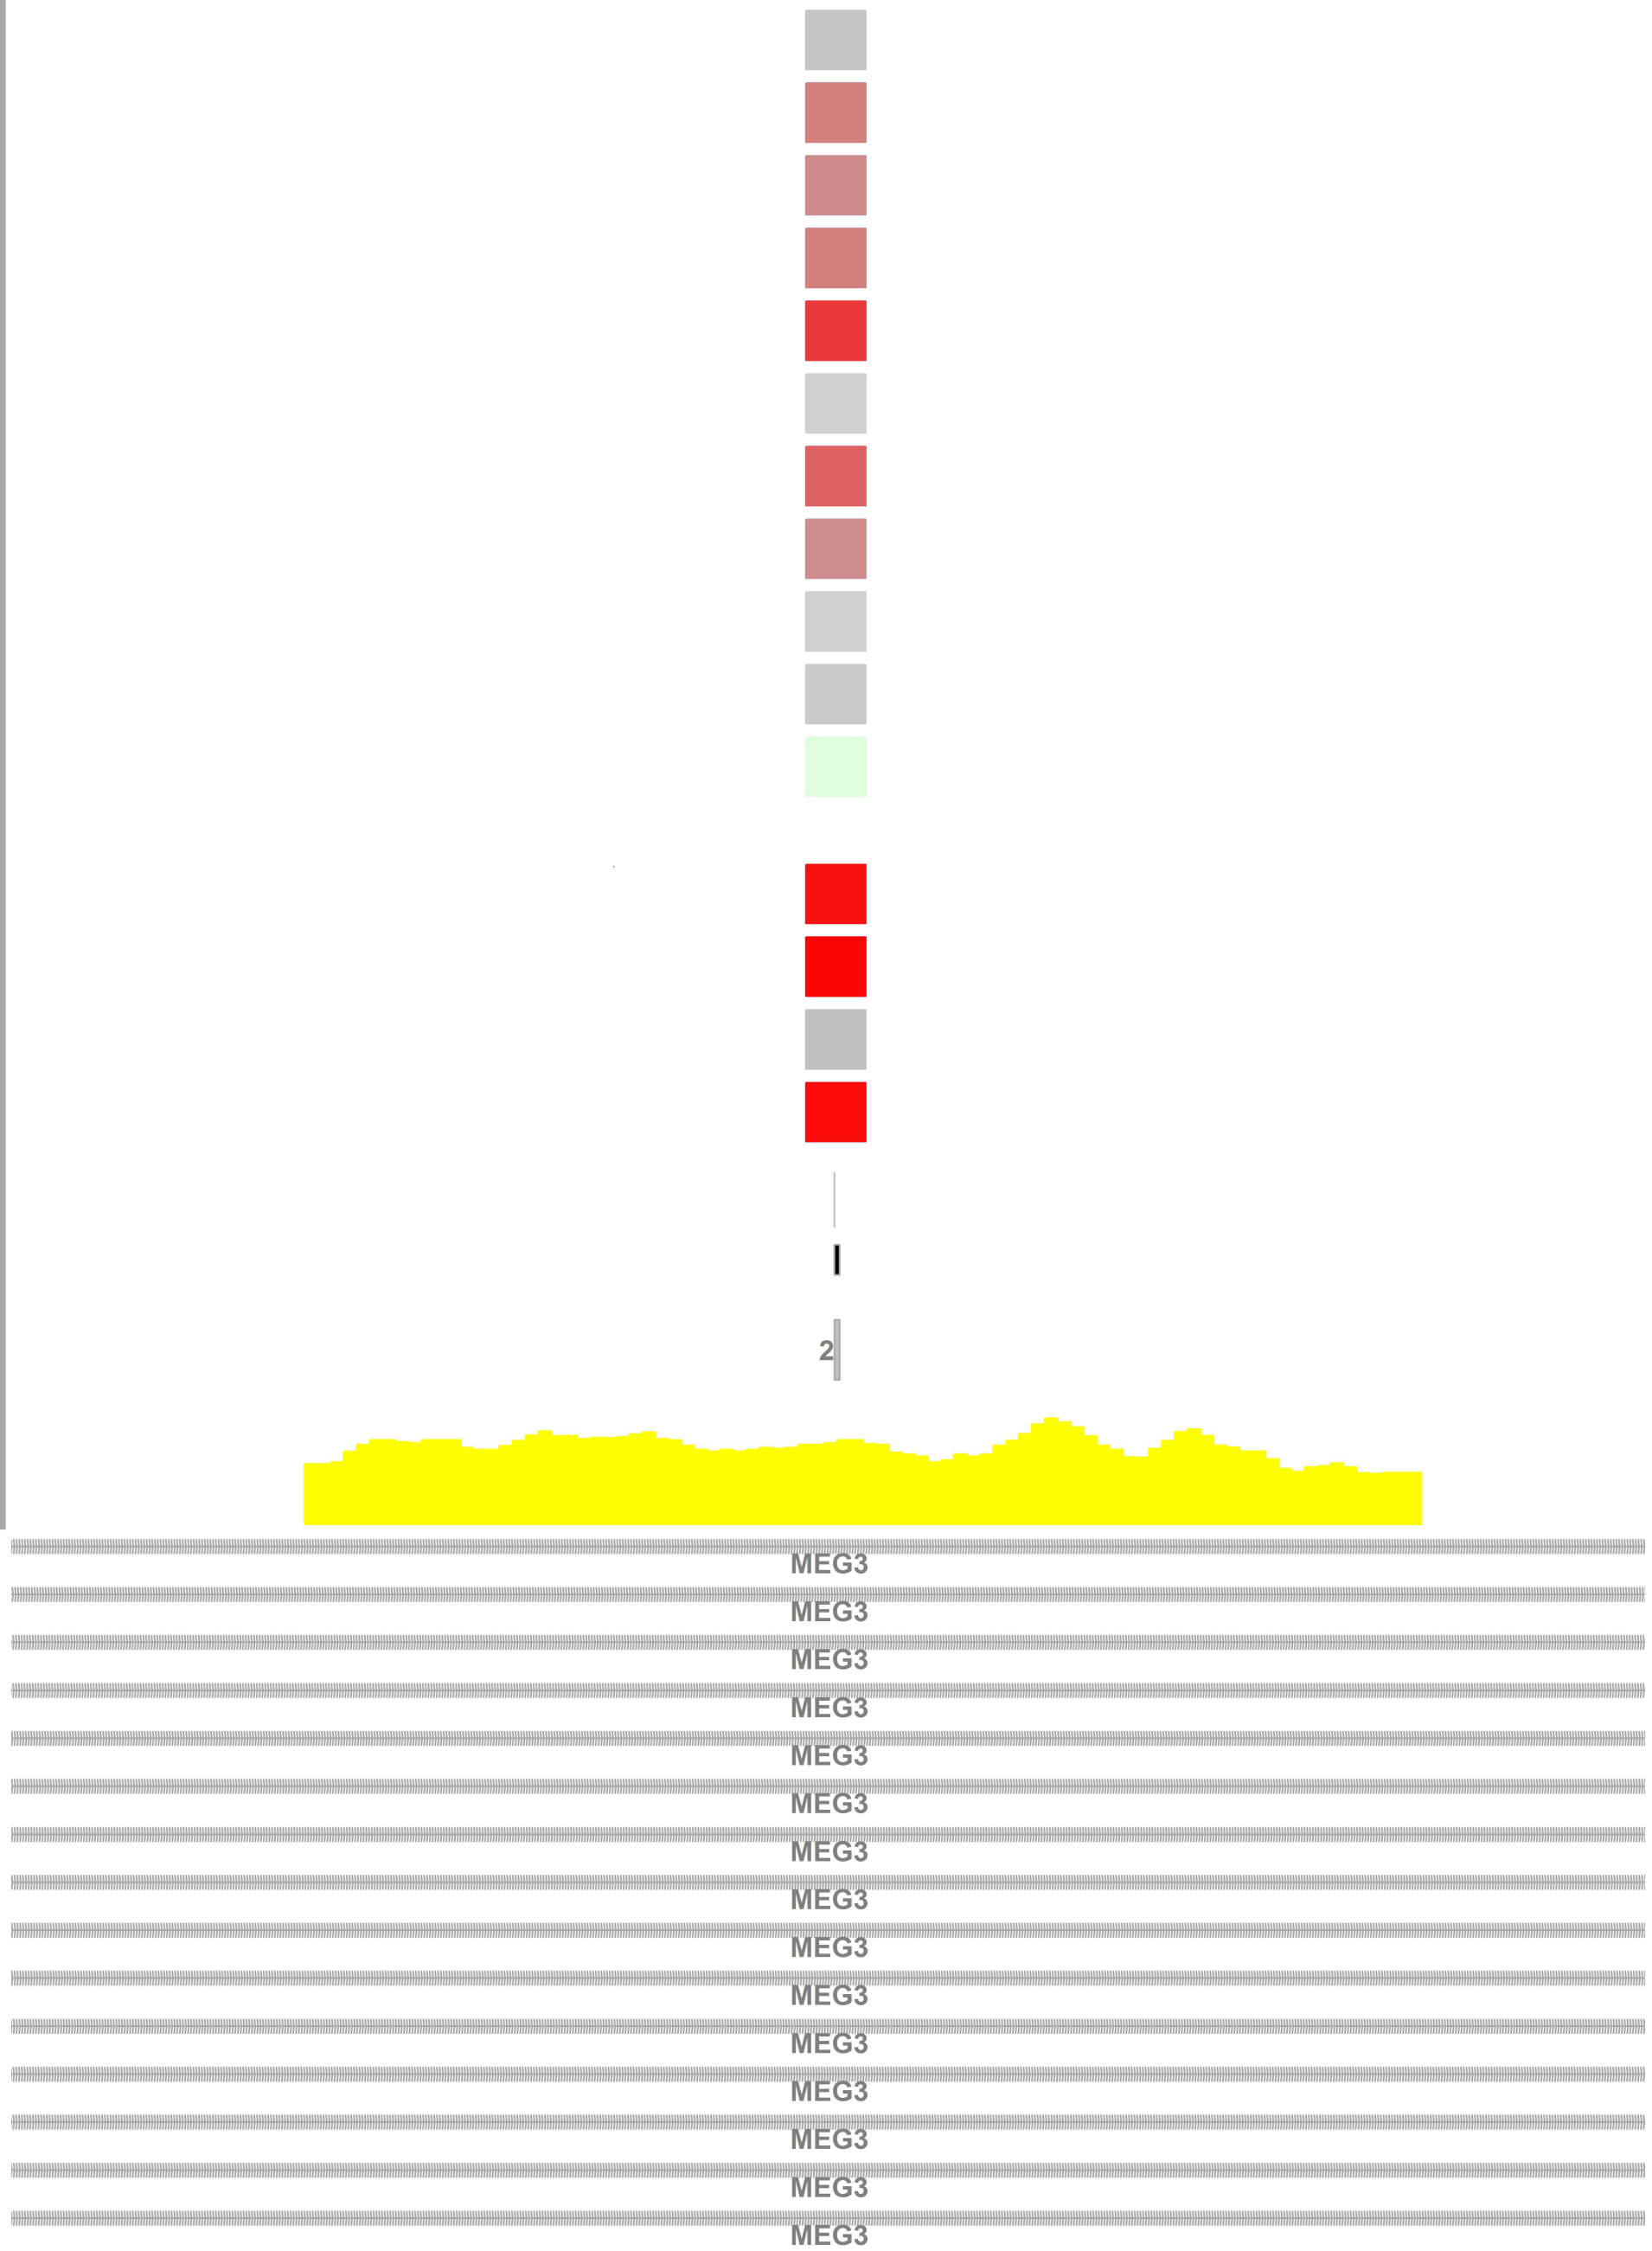



# NAP1L5 - Paternal\_chr4-89618367-89620597

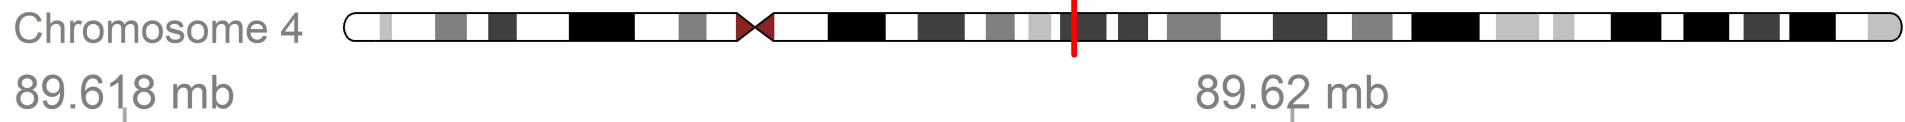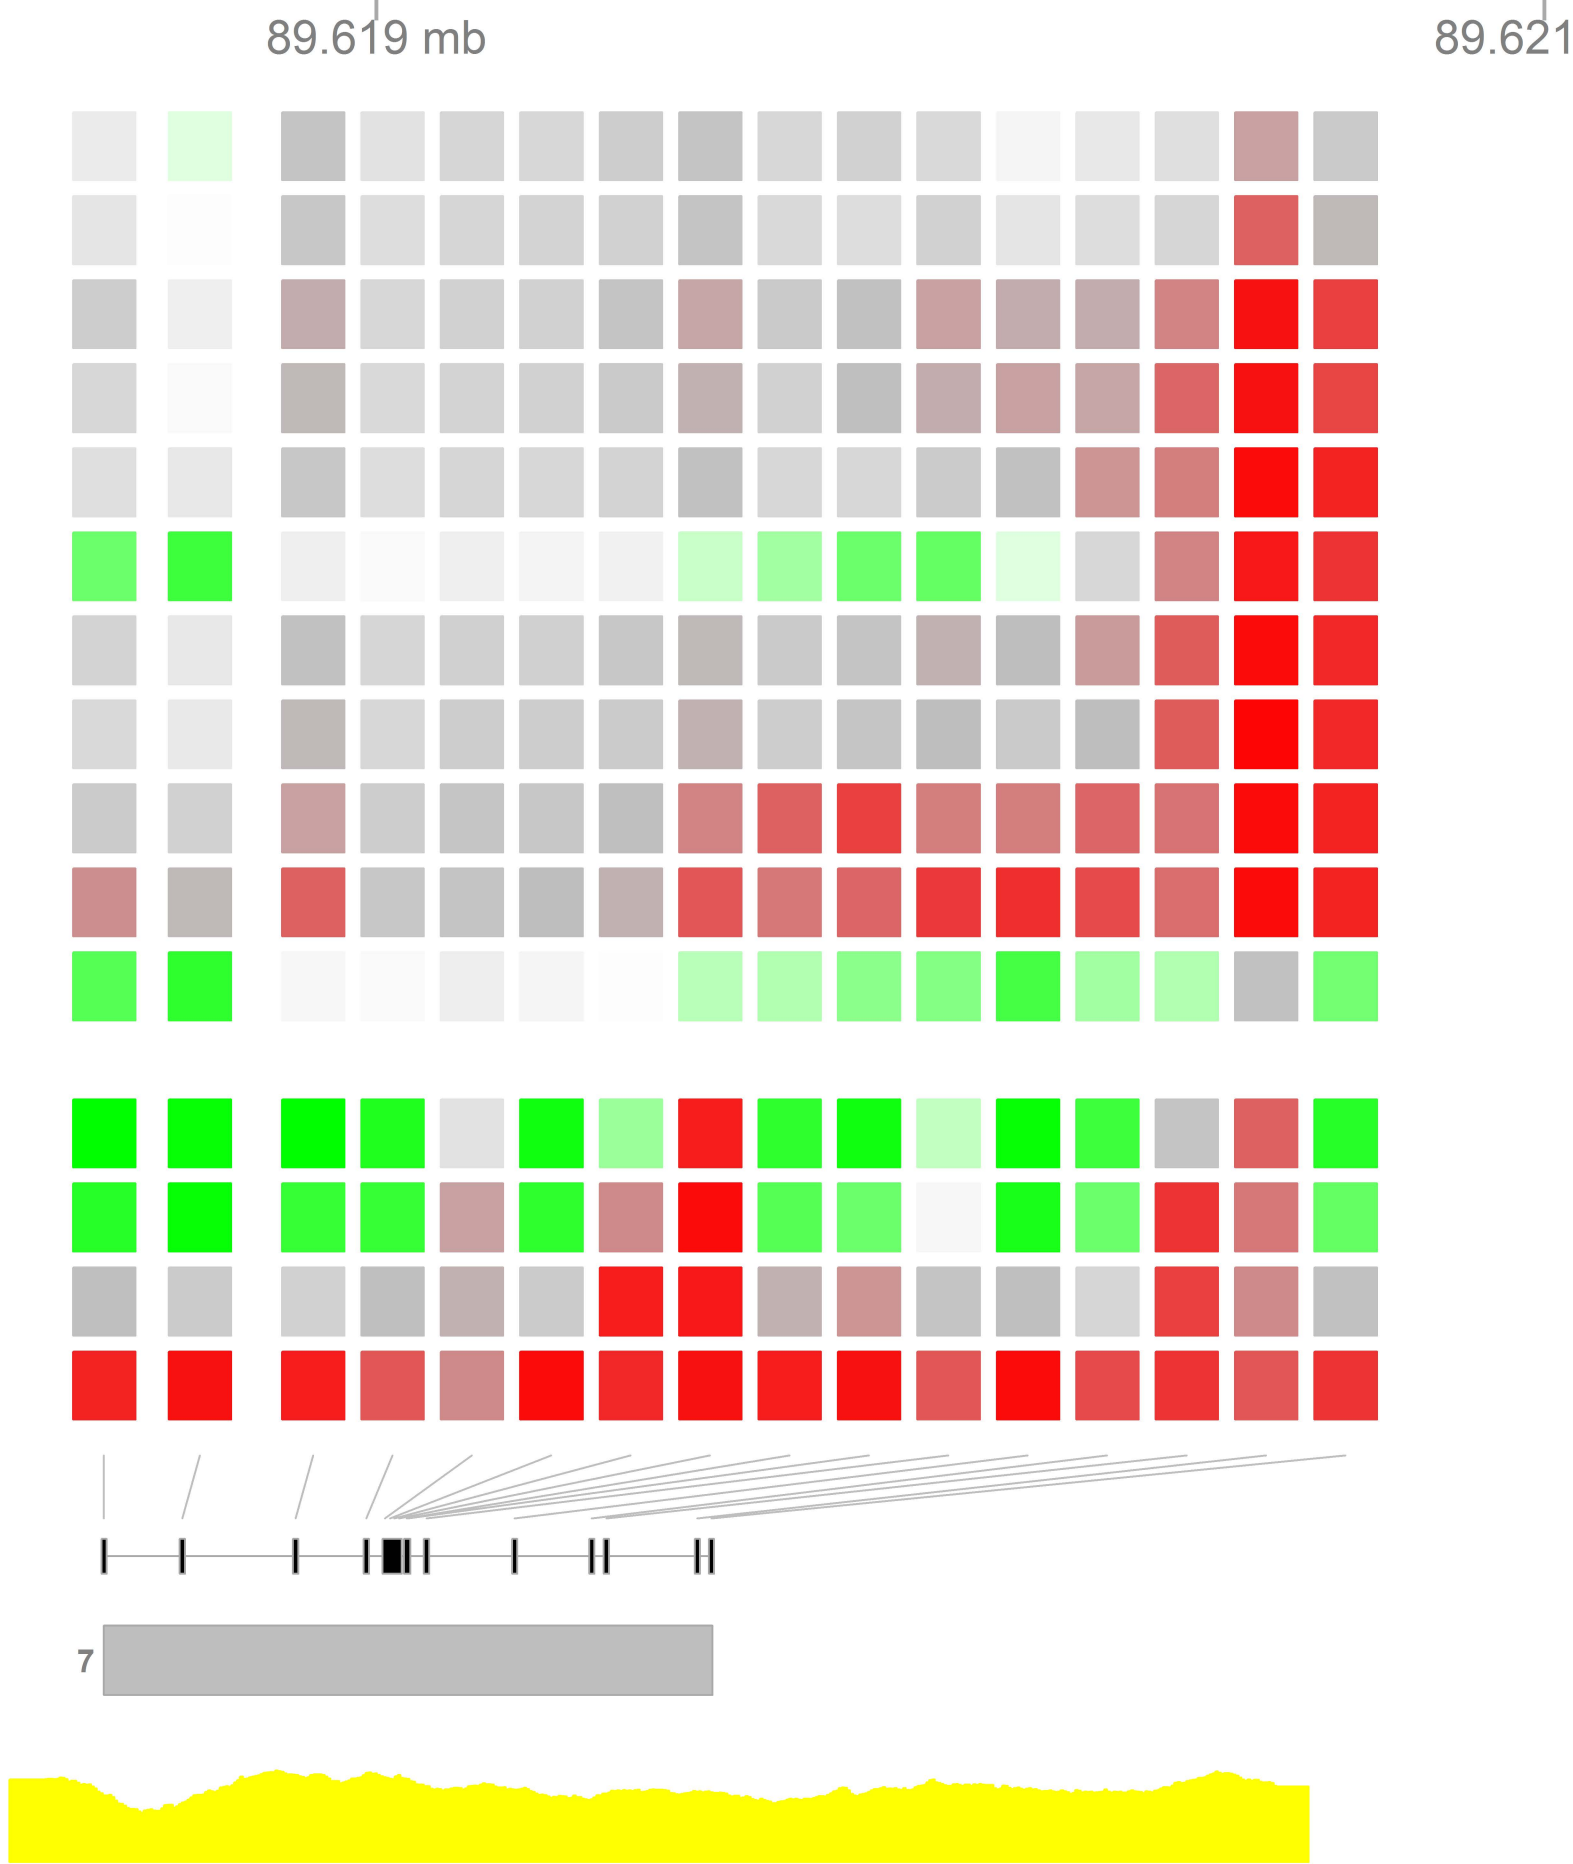

HERC3

HERC3

HERC3

NAP1L5

# NDN - Paternal\_chr15-23931560-23932547

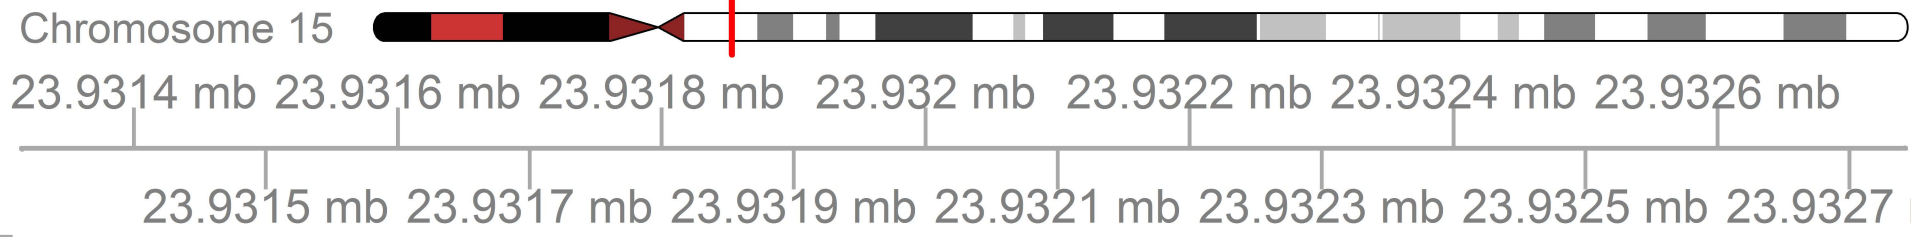

100  
80  
60  
40  
20  
0

%

- DG
- SE
- EC
- mNS
- II.TE.t
- I.TE.t
- I.TE.s.m
- I.TE.s.f
- I.TE.o
- DC
- SS

CL\_SE\_TCam2

CL\_EC\_NT2

CL\_EC\_2102Ep

CL\_EC\_NCCIT

**PROBES**

**HMM**

**GC %**

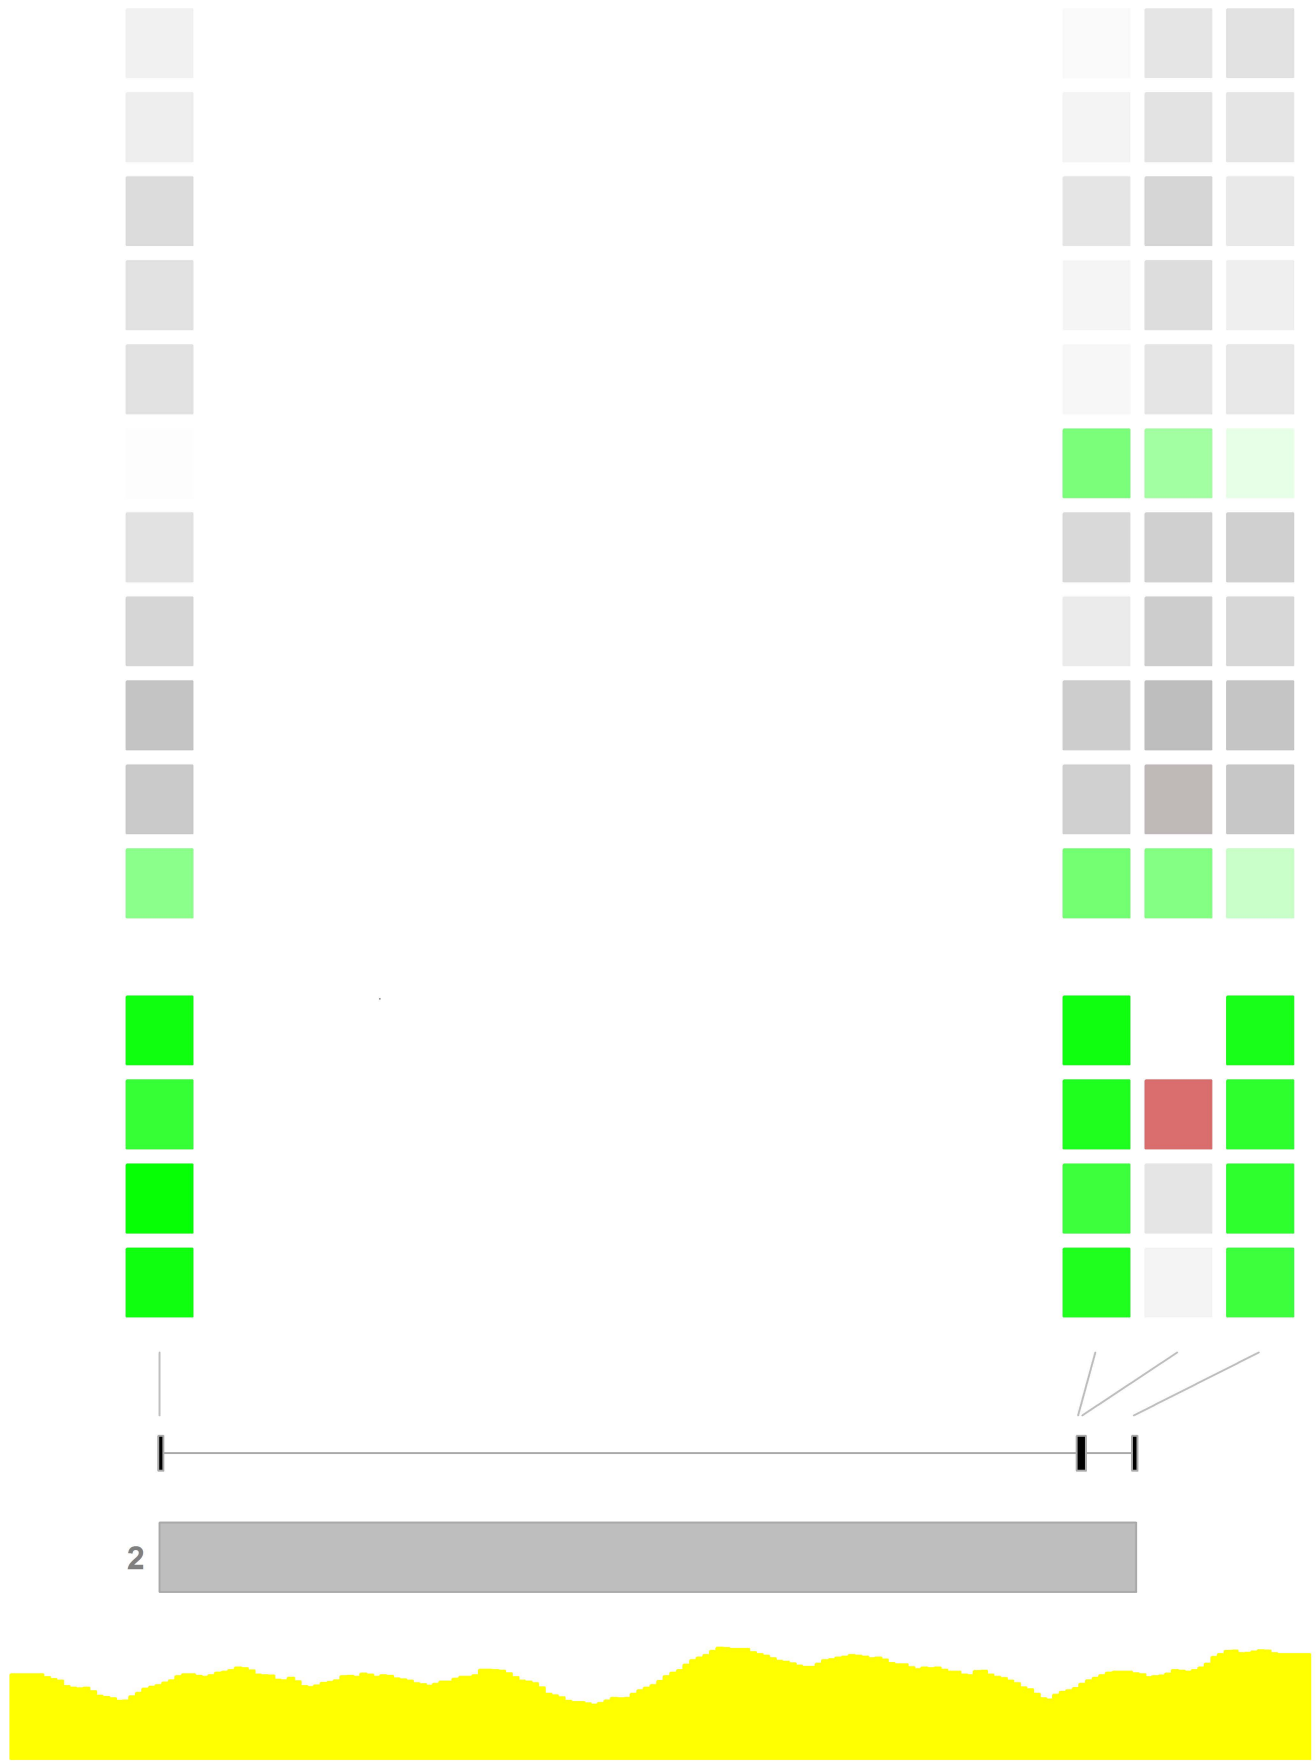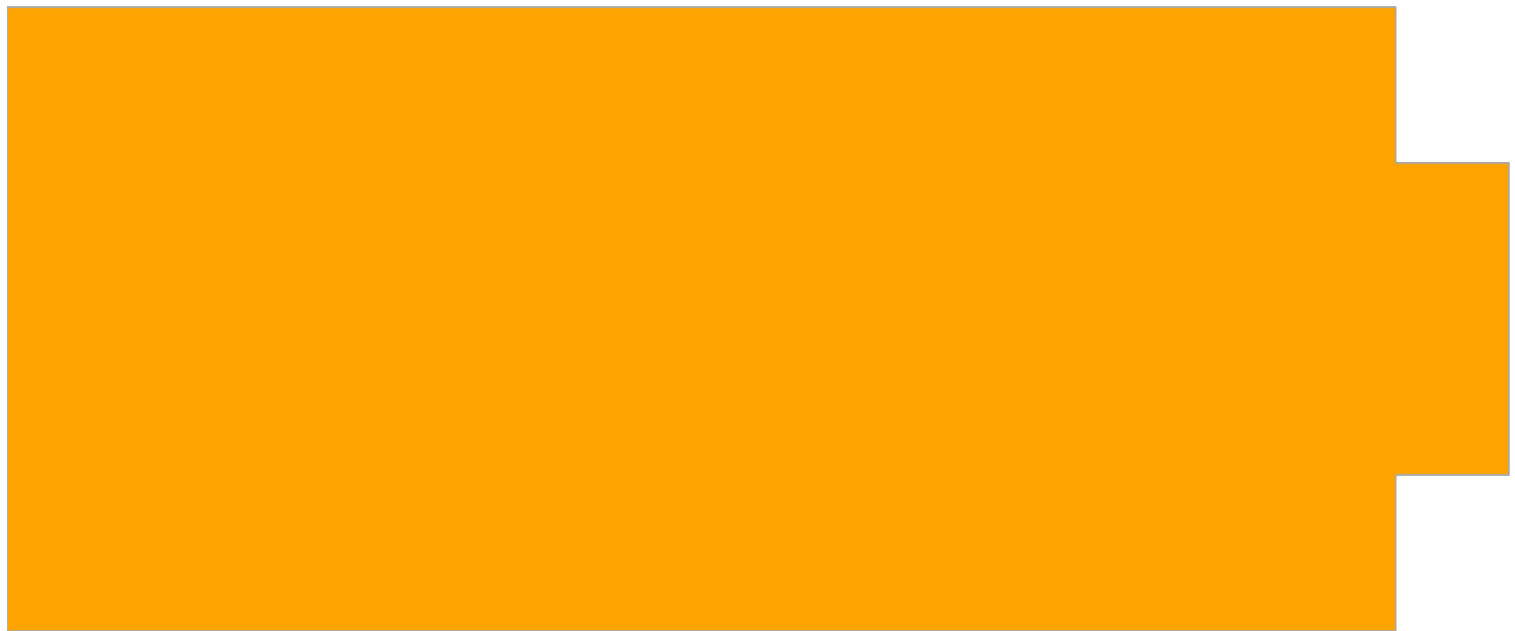





# PEG13 - Paternal\_chr8-141107838-141110984

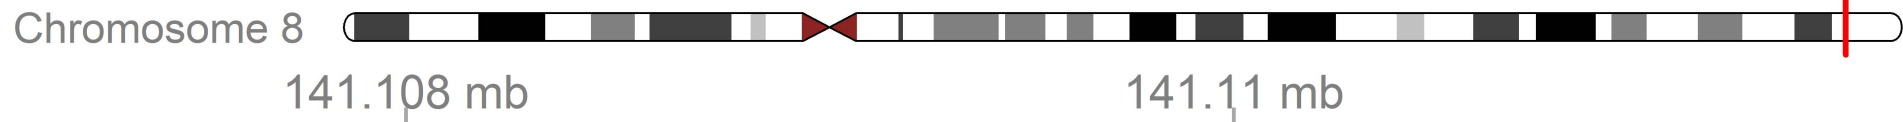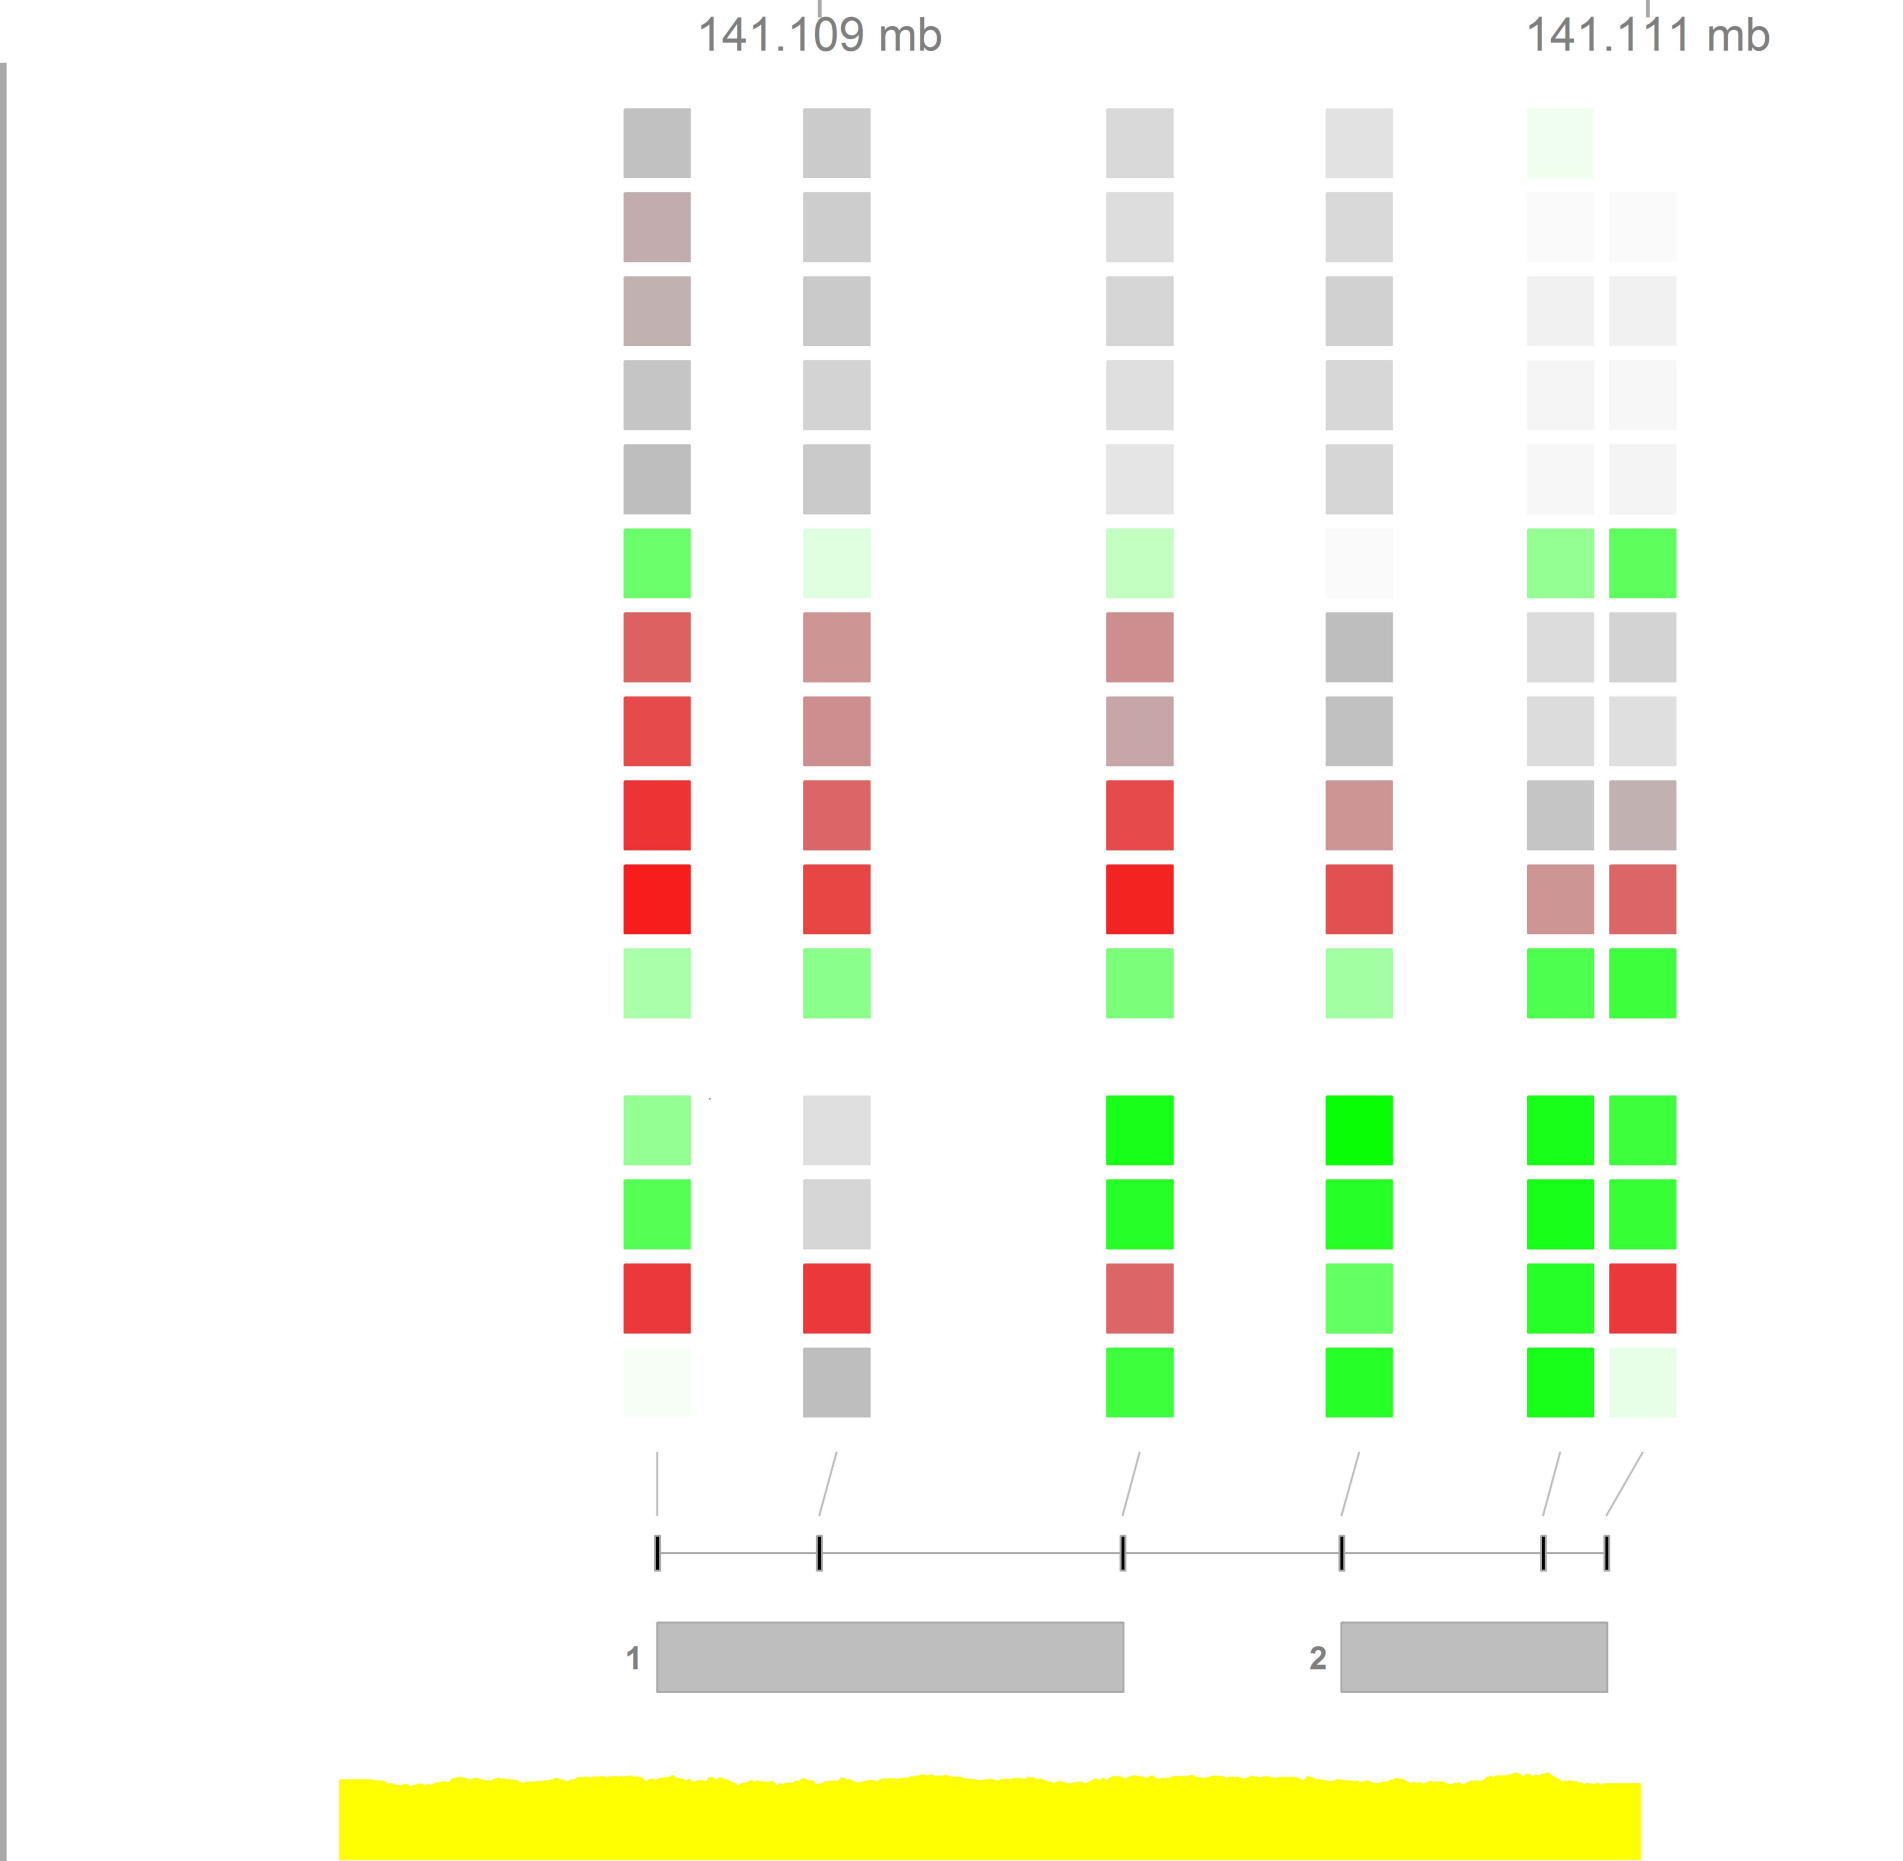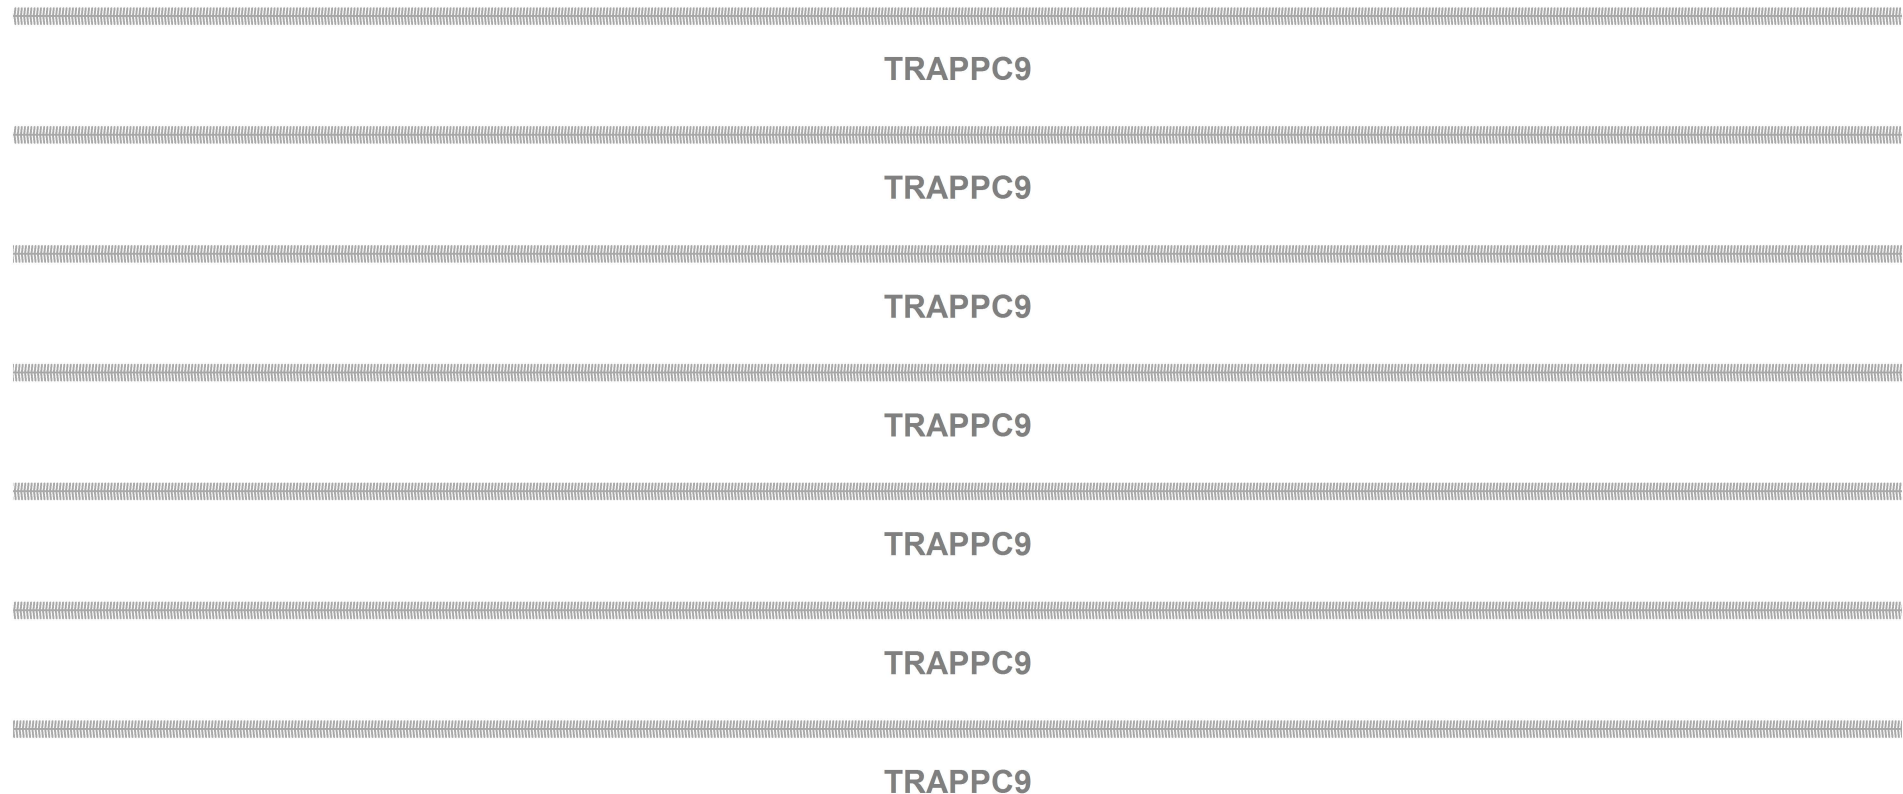



# SNURF\_SNRPN, SNURF-SNRPN - Paternal\_chr15-25199934-25200343

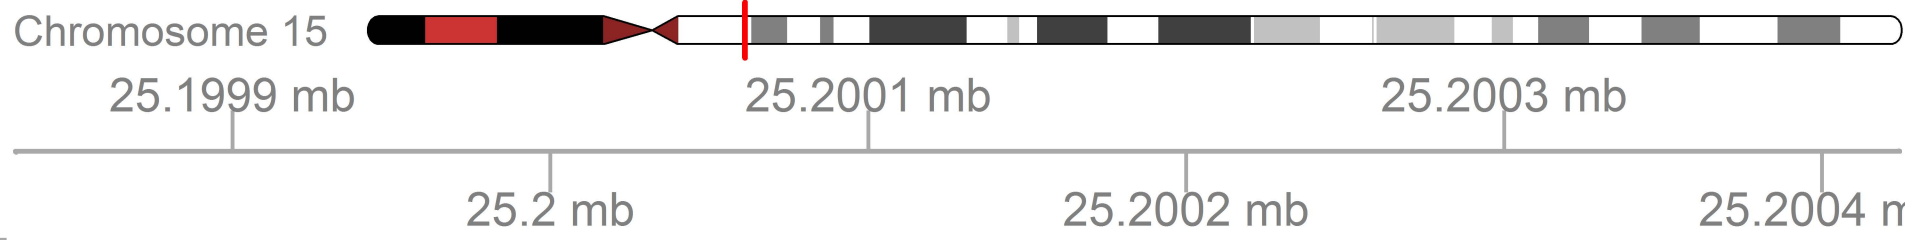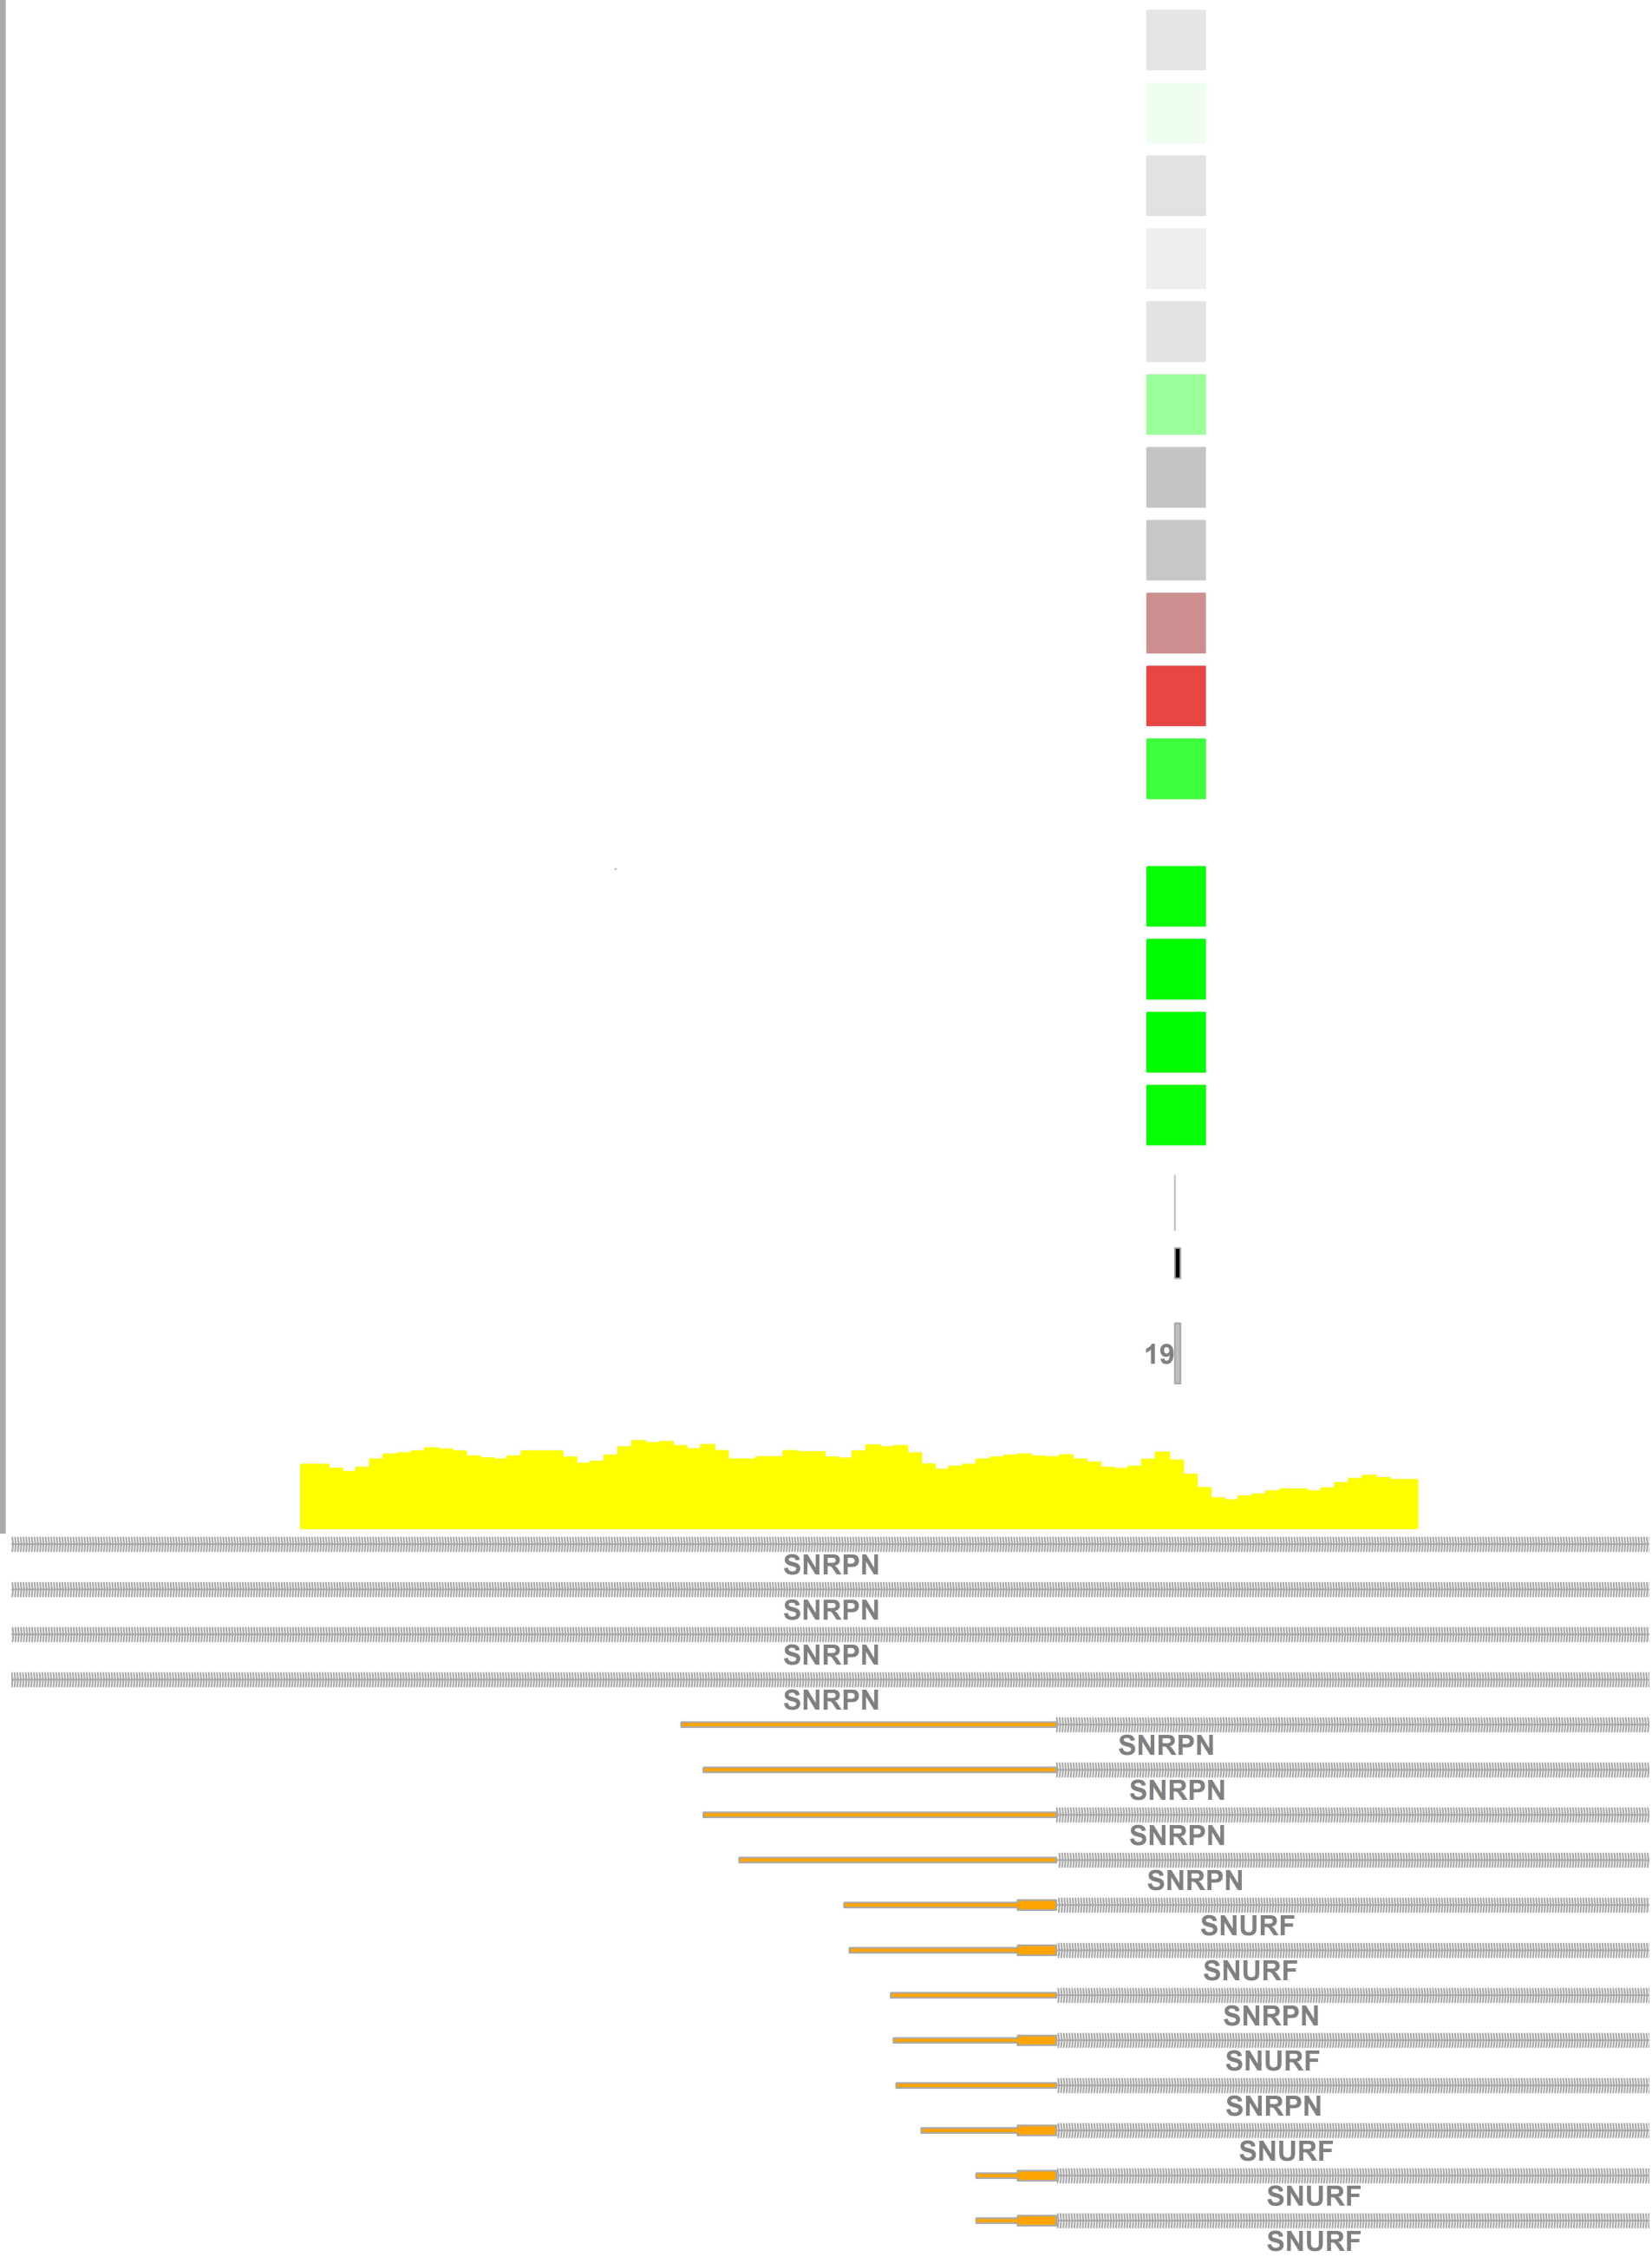

# TCEB3C - Unknown\_chr18-44554880-44556671

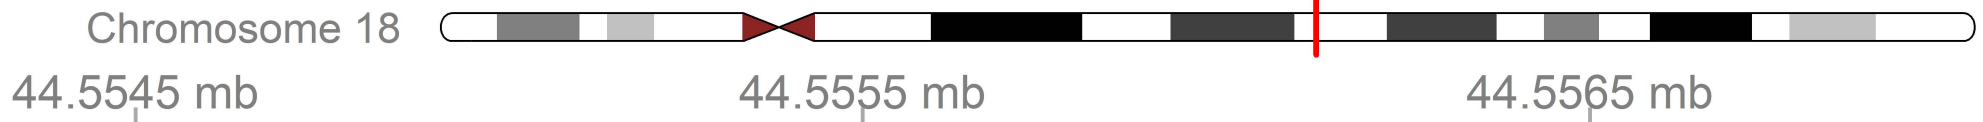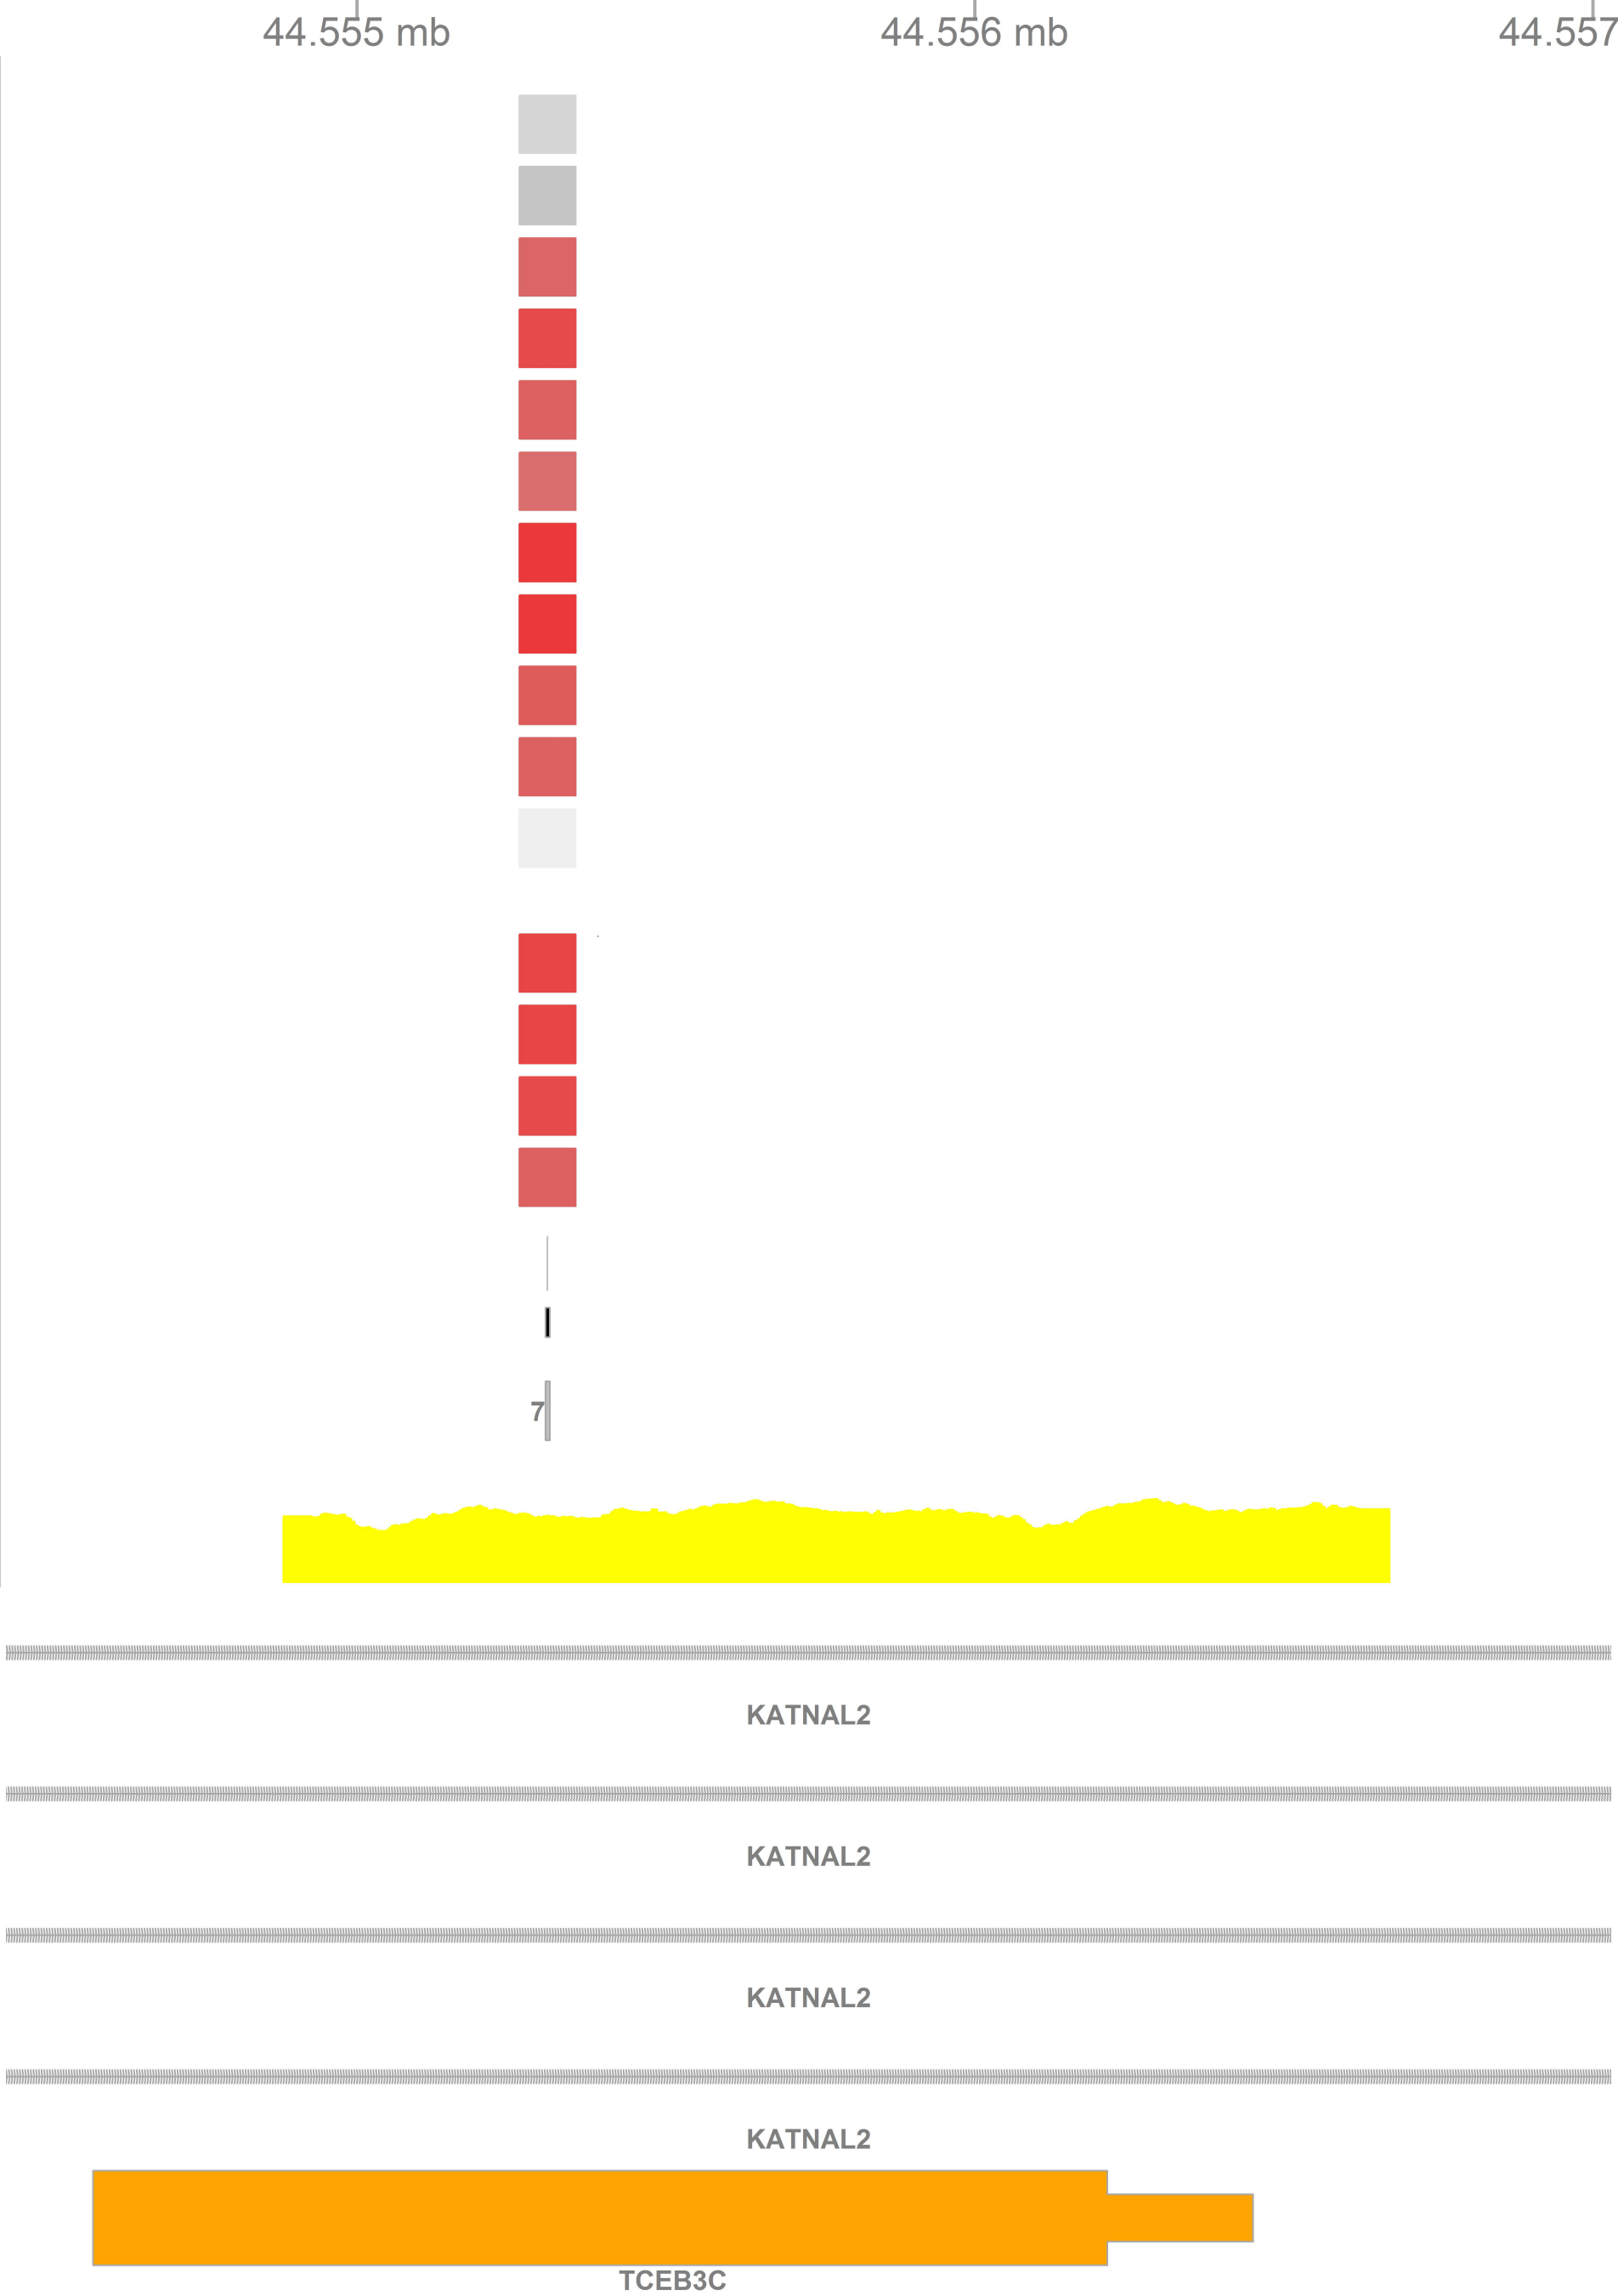

# USP29 - Paternal\_chr19-57630348-57630725

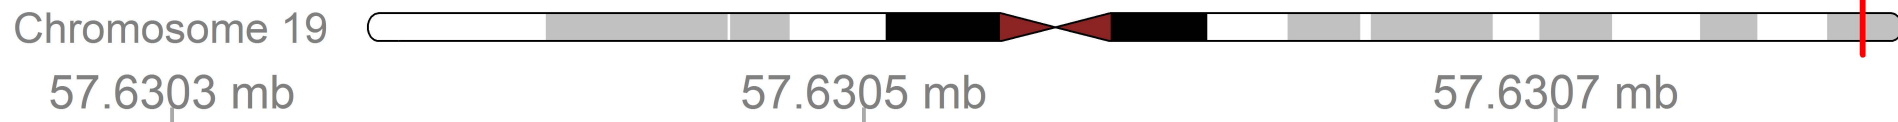

57.6304 mb

57.6306 mb

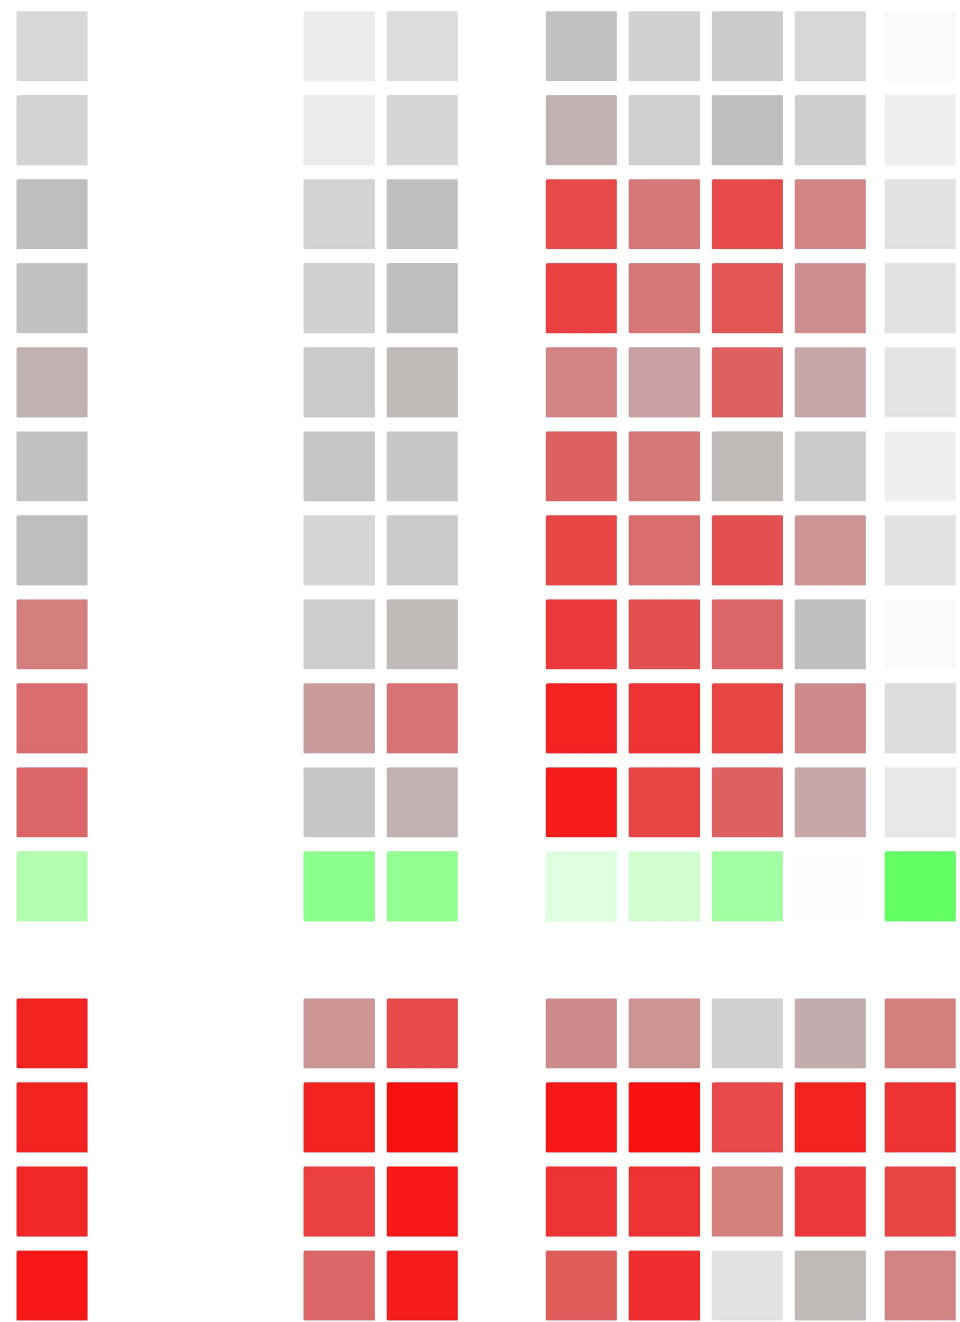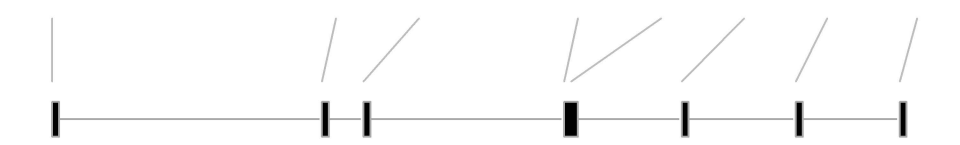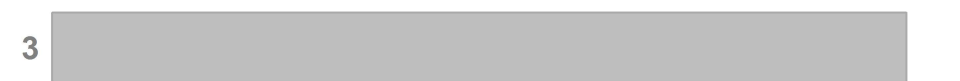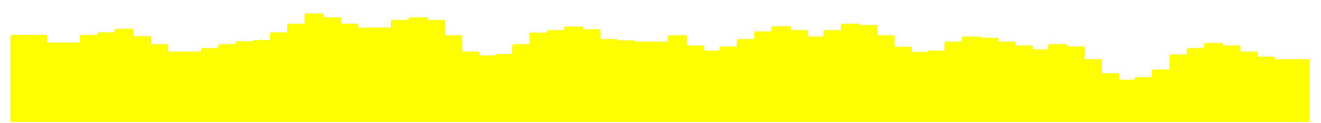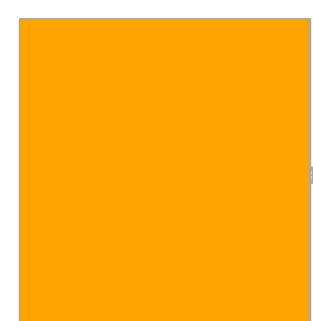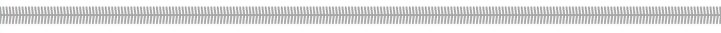

**WT1.ARR, WT1-AS - Paternal, Unknown\_chr11-32453776-32455394**

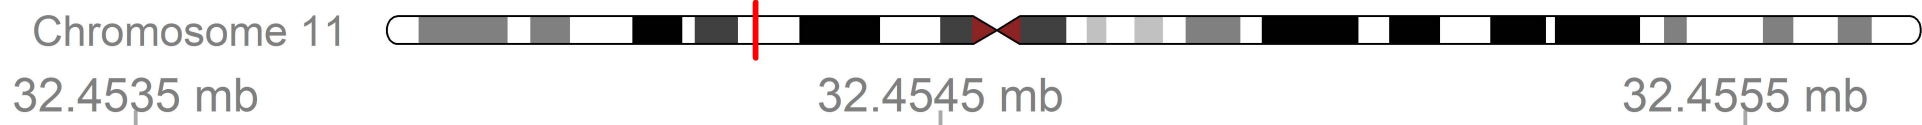

32.454 mb

32.455 mb

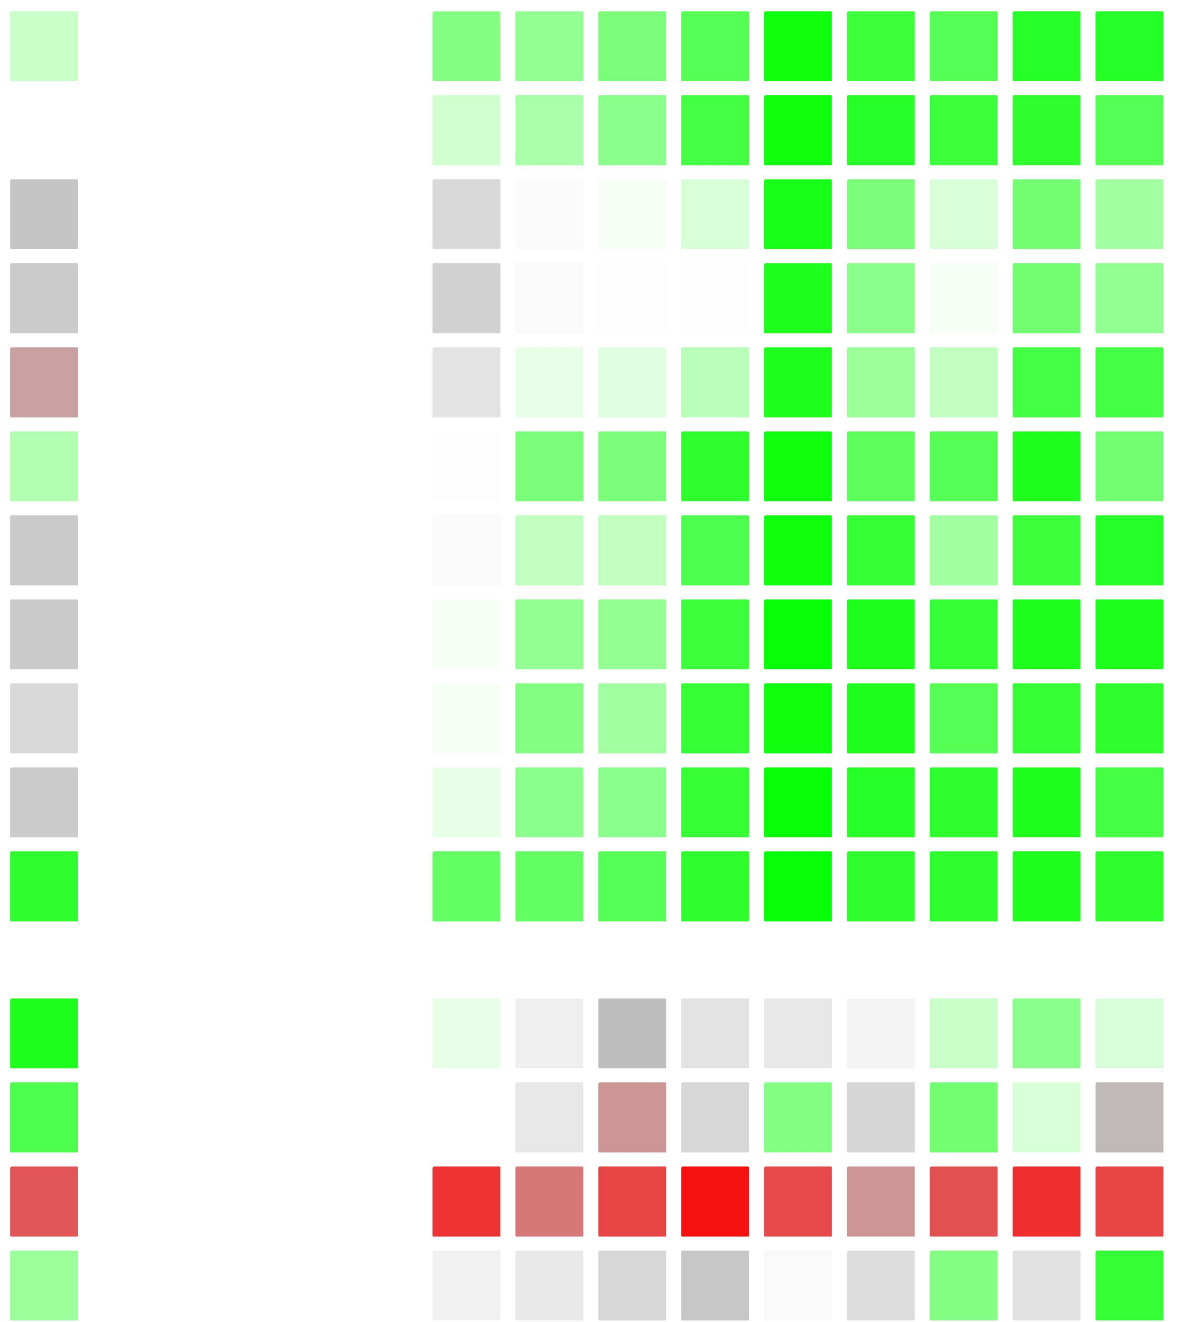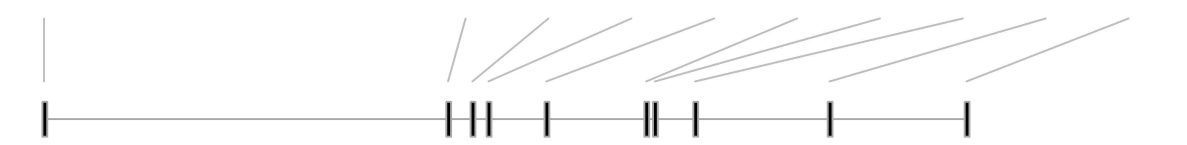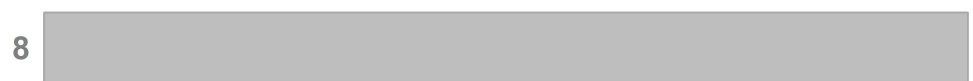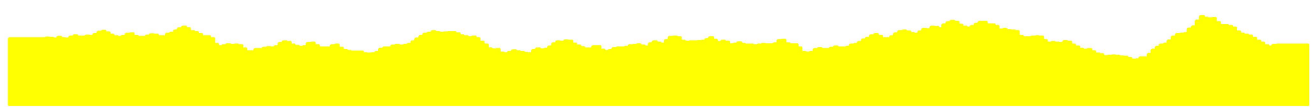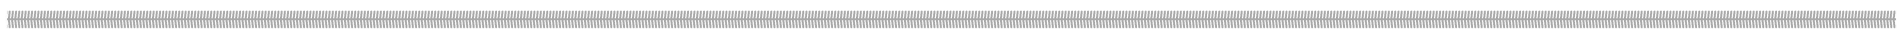

WT1

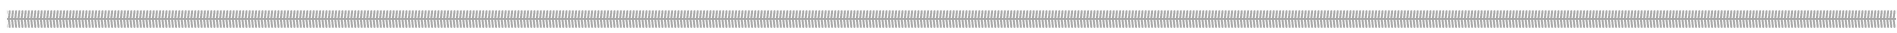

WT1

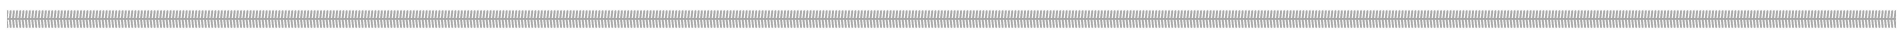

WT1

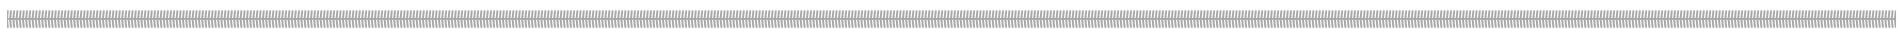

WT1





# ZIM2 - Paternal\_chr19-57351728-57352173

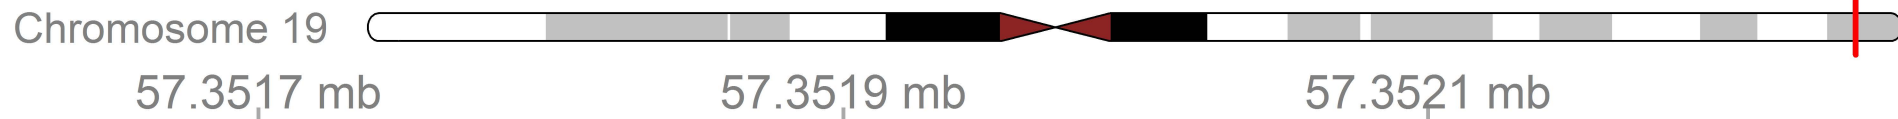

**Legend for % values:**

- 100: DG
- 80: SE
- 60: EC
- 40: mNS
- 20: II.TE.t
- 0: I.TE.t
- I.TE.s.m
- I.TE.s.f
- I.TE.o
- DC
- SS

**Legend for PROBES:**

- CL\_SE\_TCam2
- CL\_EC\_NT2
- CL\_EC\_2102Ep
- CL\_EC\_NCCIT

**Legend for HMM:**

- 2

**Legend for GC %:**

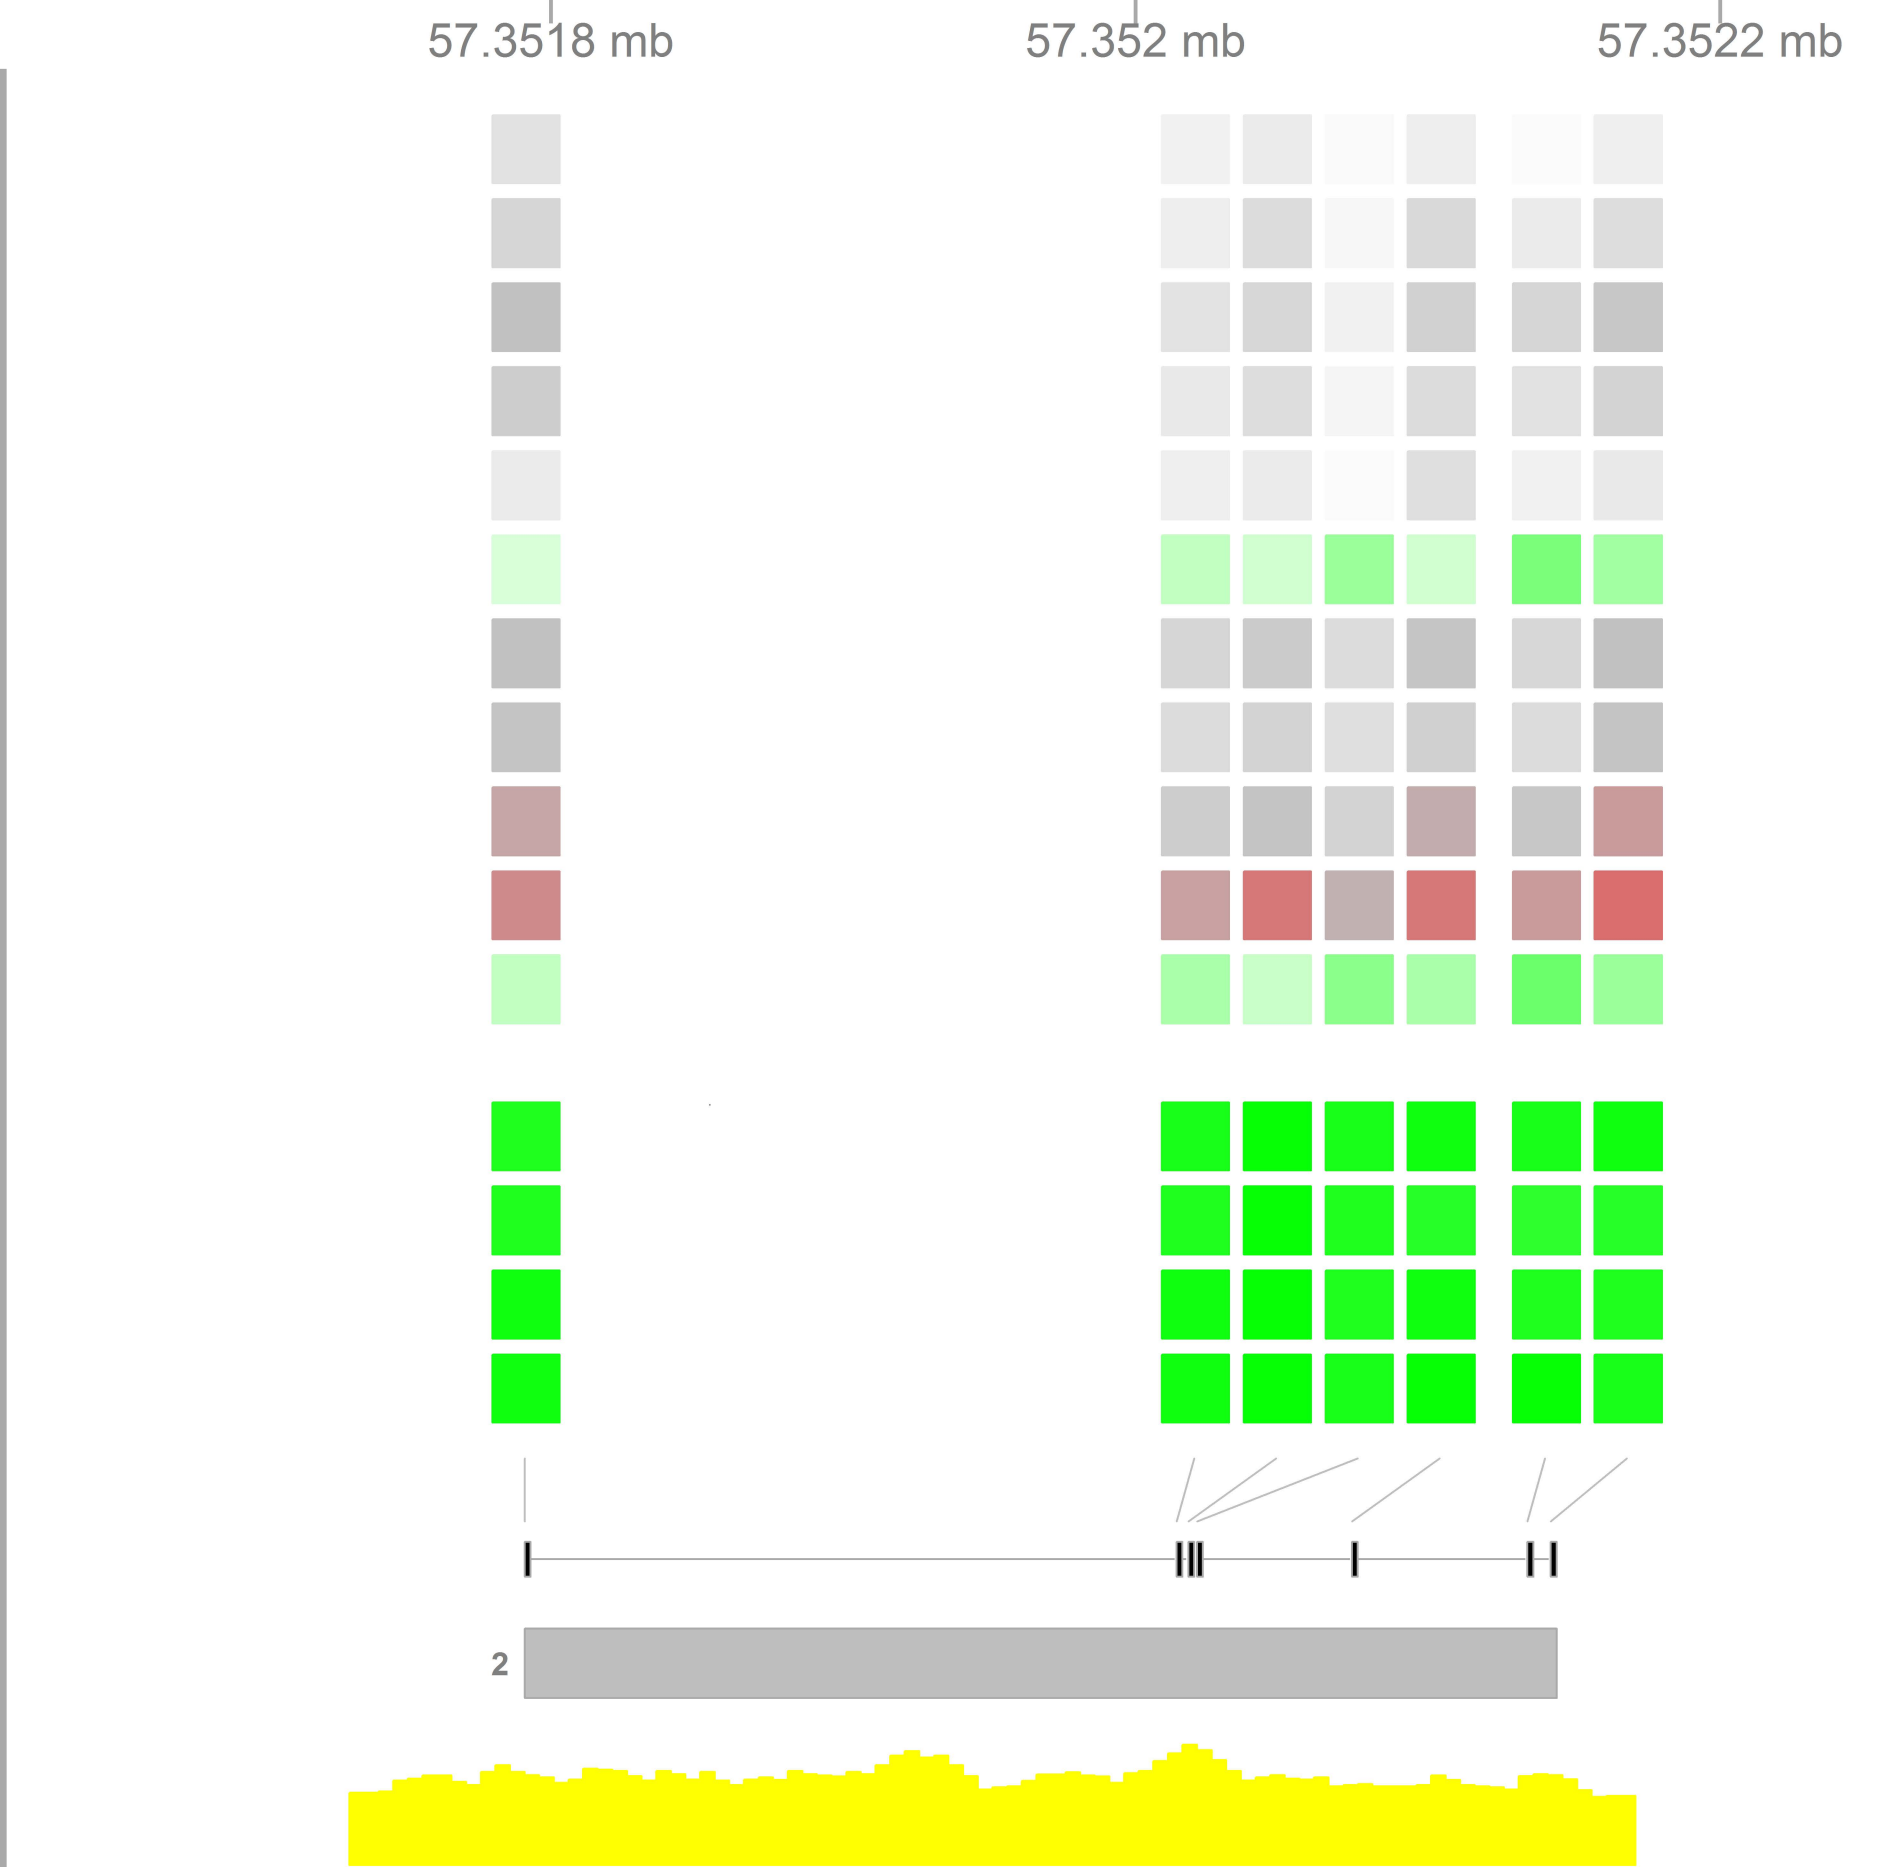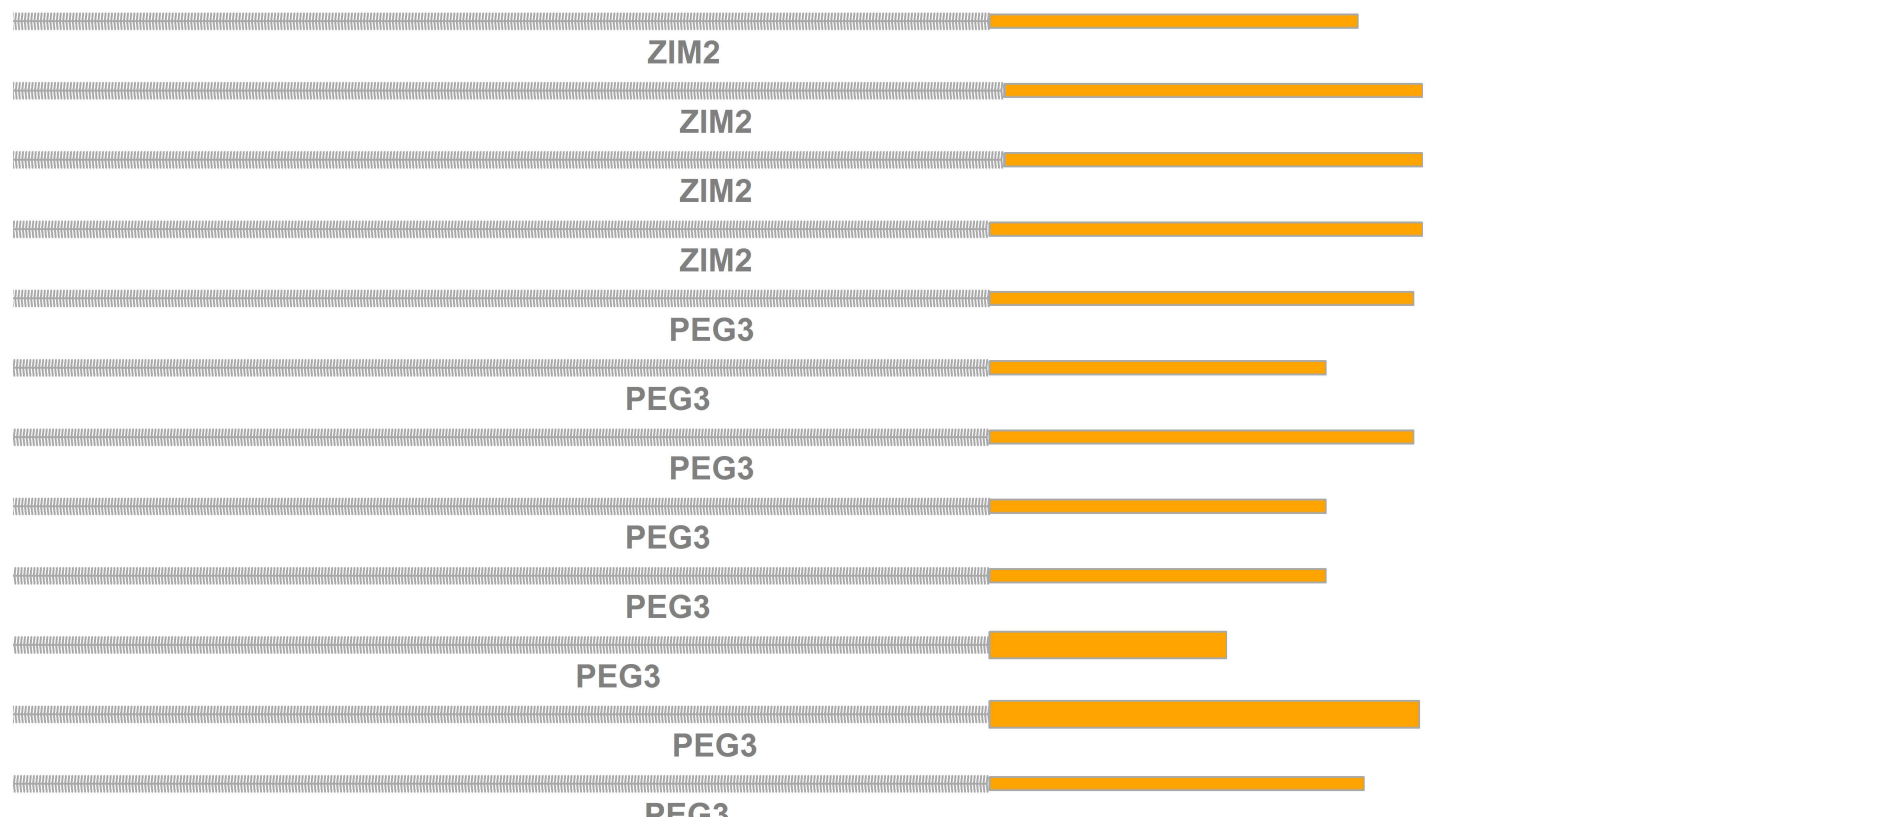

Supplement: pone.0122146.s006.pdf [file pone.0122146.s006.pdf]
