# Supplementary material for: Genome Wide DNA Methylation Profiles Provide Clues to the Origin and Pathogenesis of Germ Cell Tumors
Source: PubMed Central journal article supplement (PMC4479500; doi:10.1371/journal.pone.0122146), 2015-04-10
Supplement: pone.0122146.s004.pdf [file pone.0122146.s004.pdf]

**./clusters/cluster10\_SE\_DGvstype.I.TEhypermethylated\_SE\_DG\_chr17-6898207-6900758**

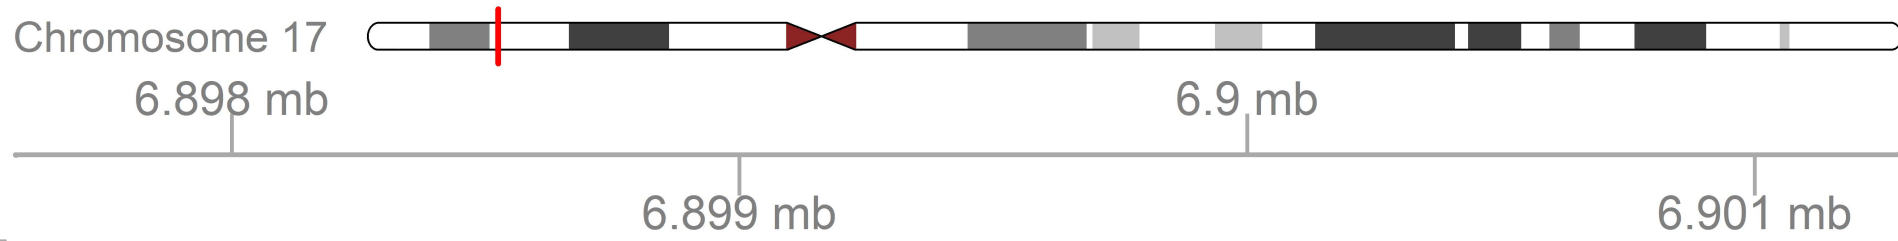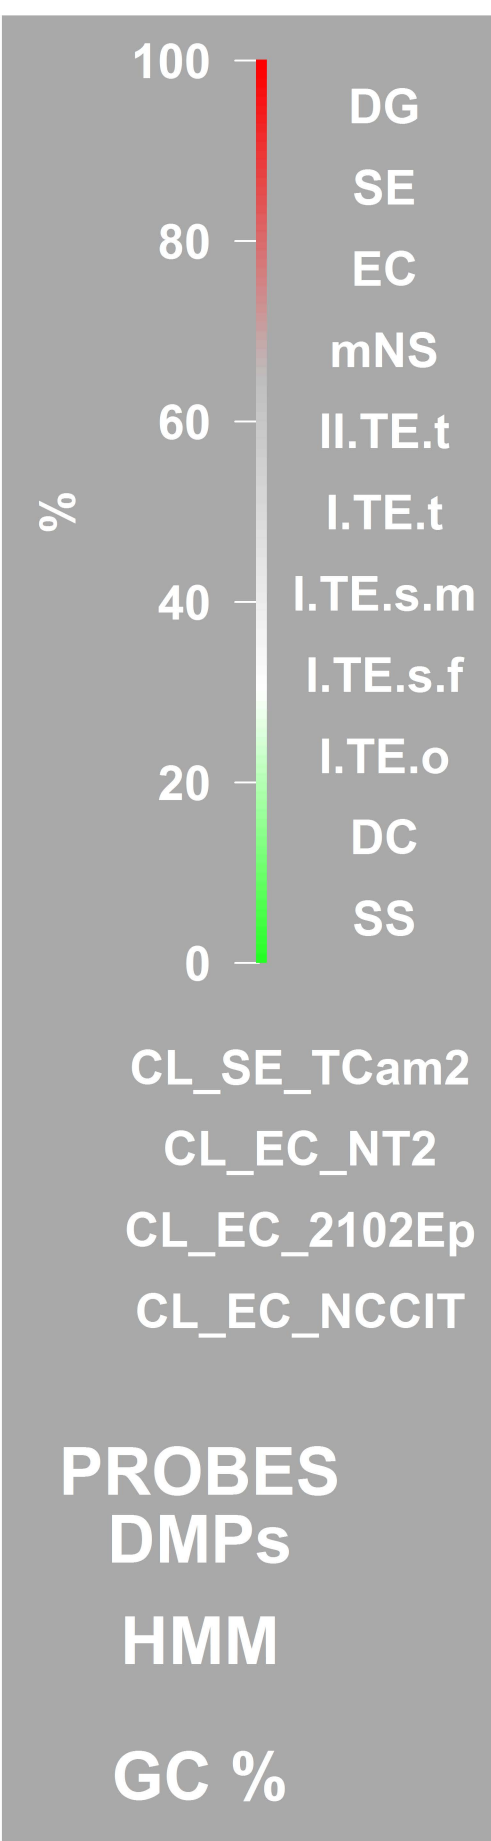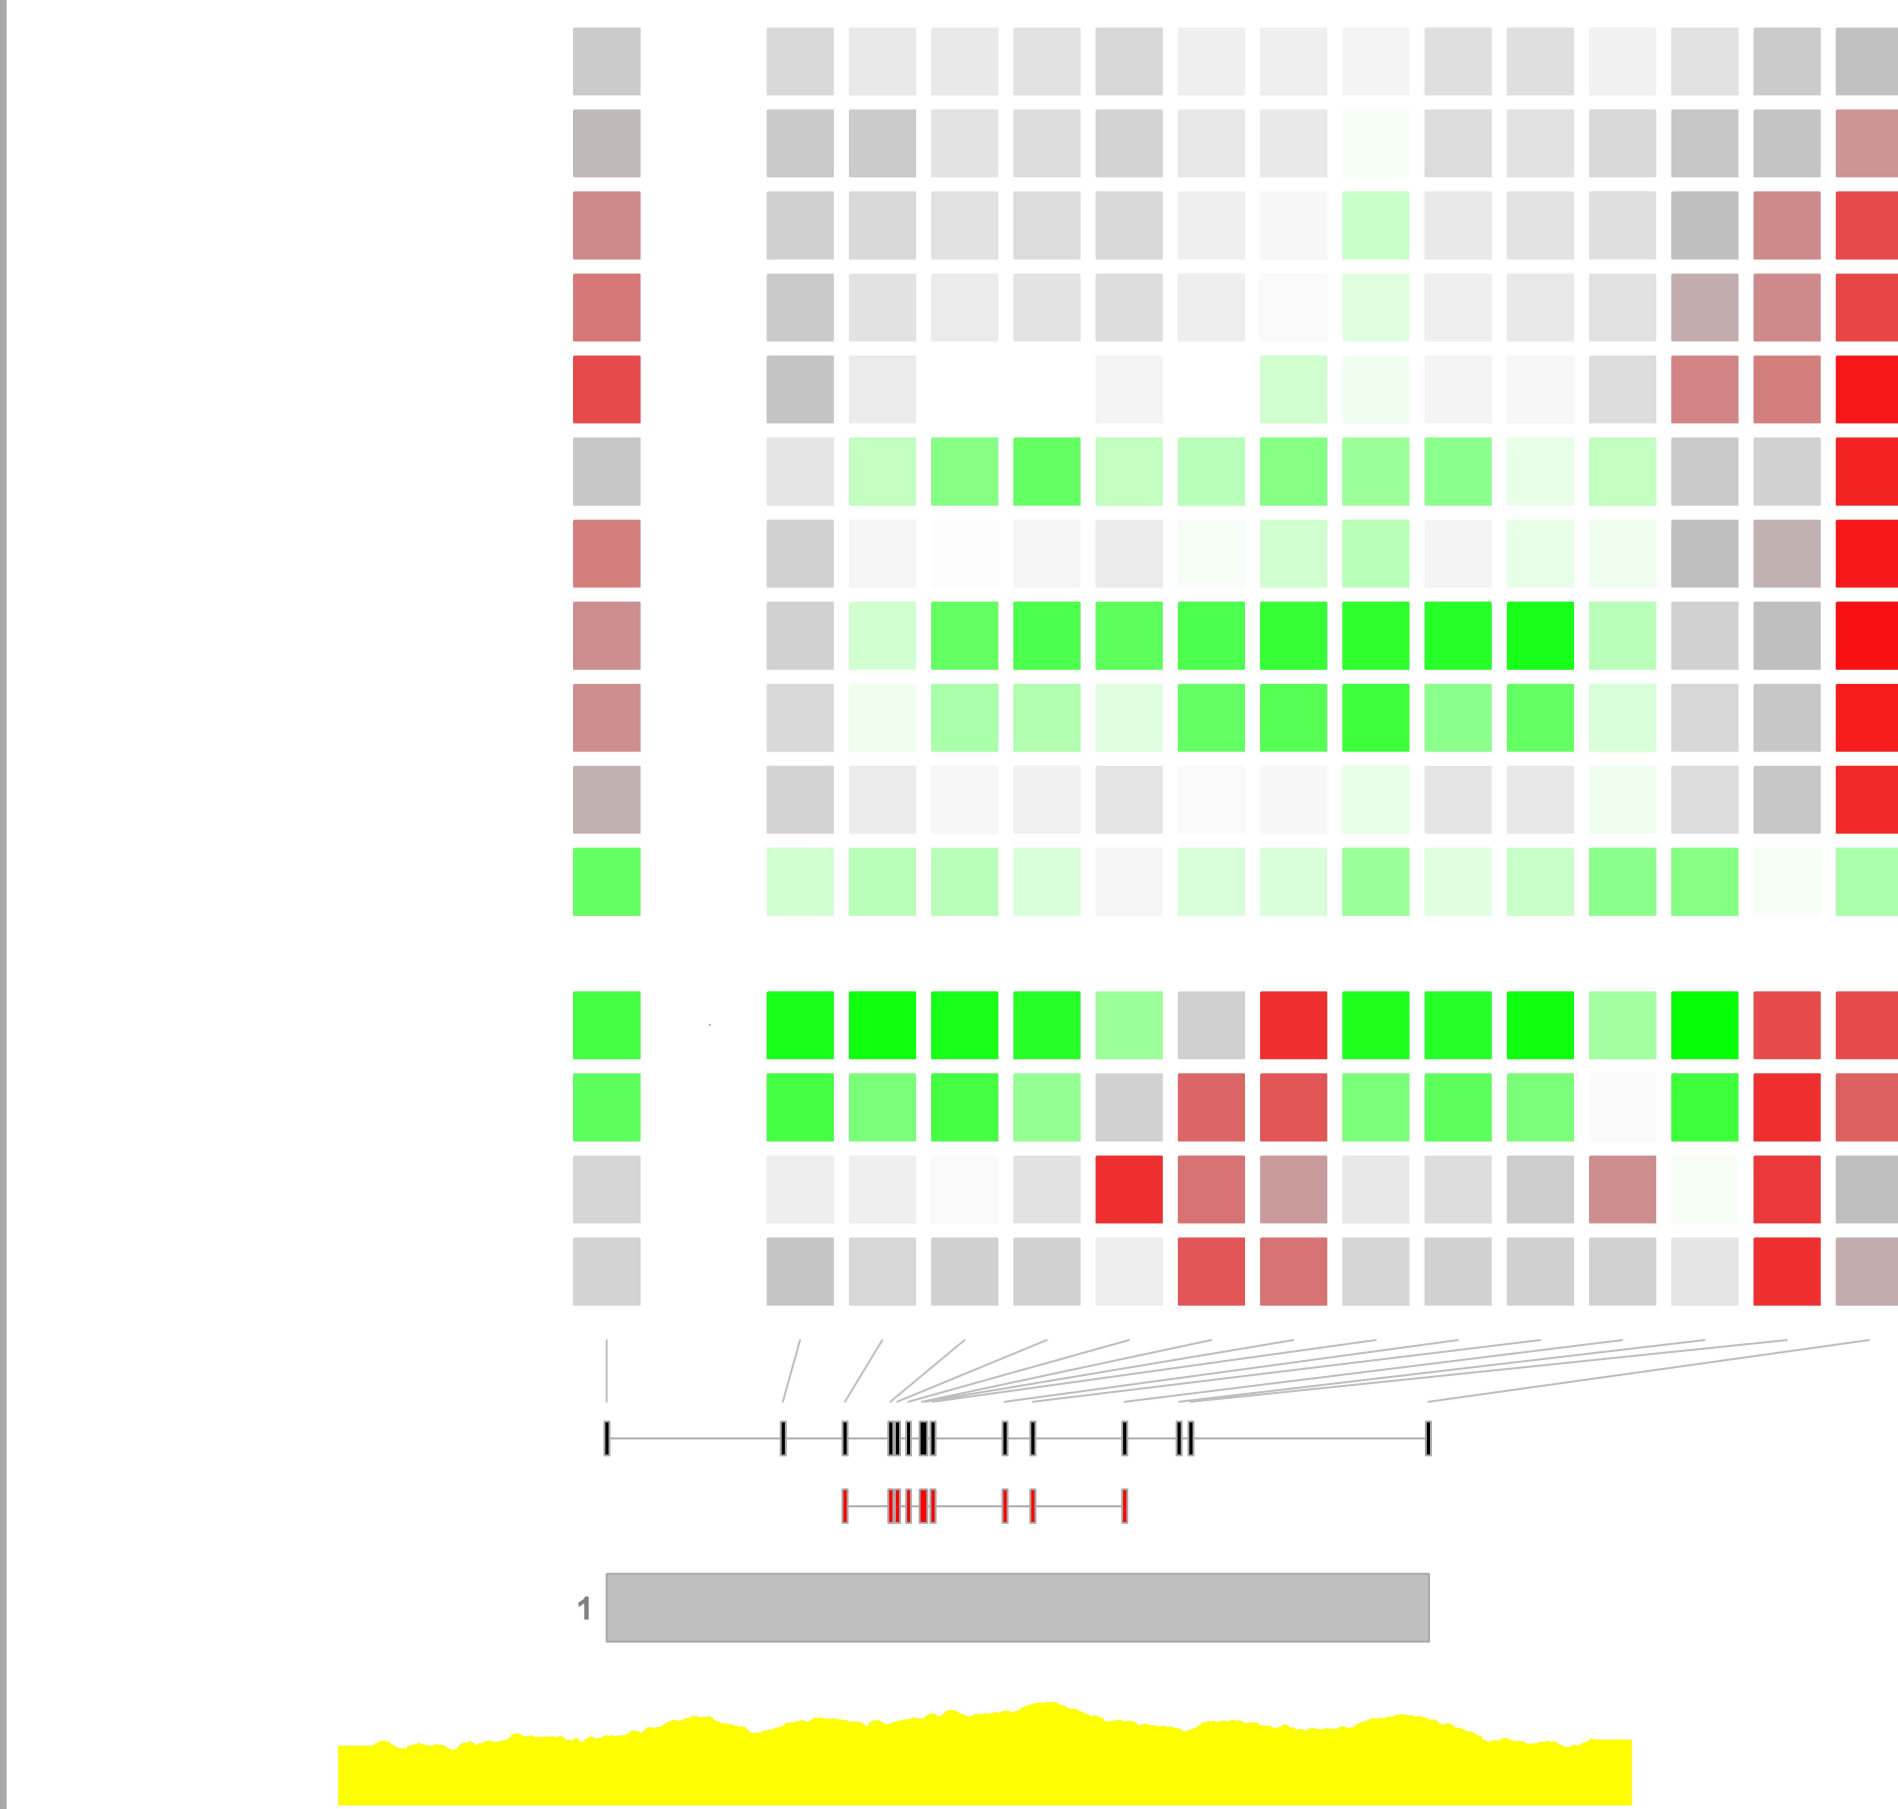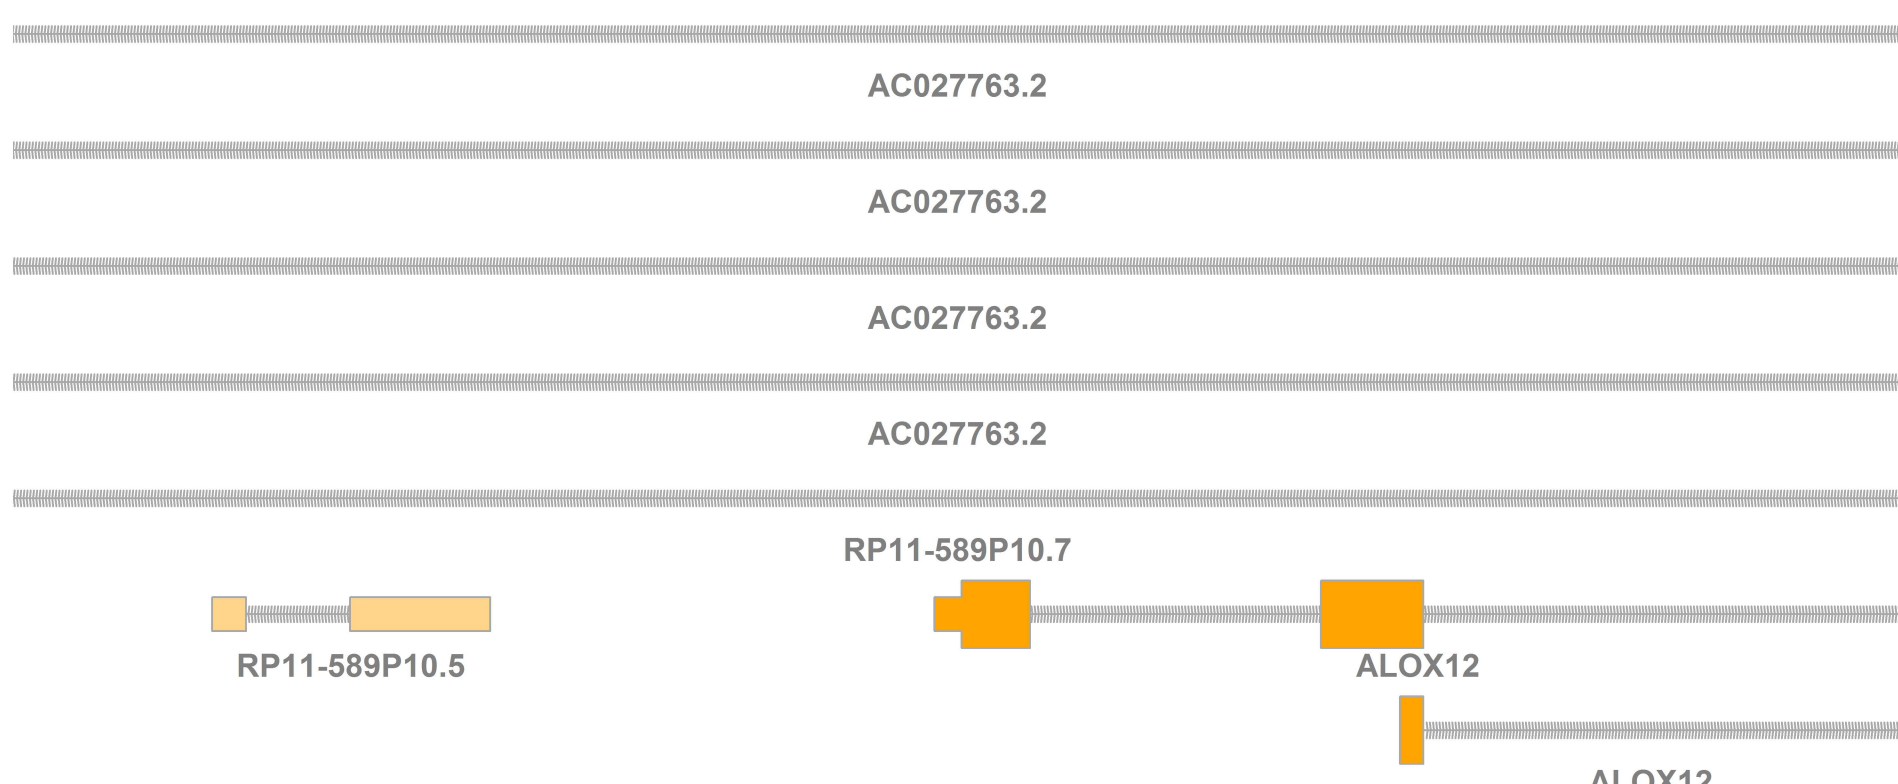

./clusters/cluster12\_SE\_DGvstype.I.TEhypermethylated\_SE\_DG\_chr2-233250770-233254378

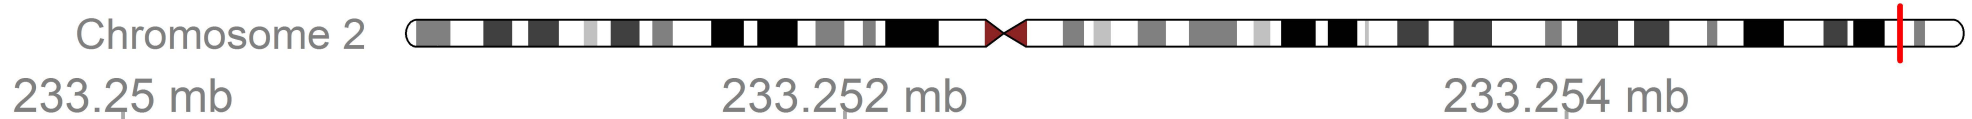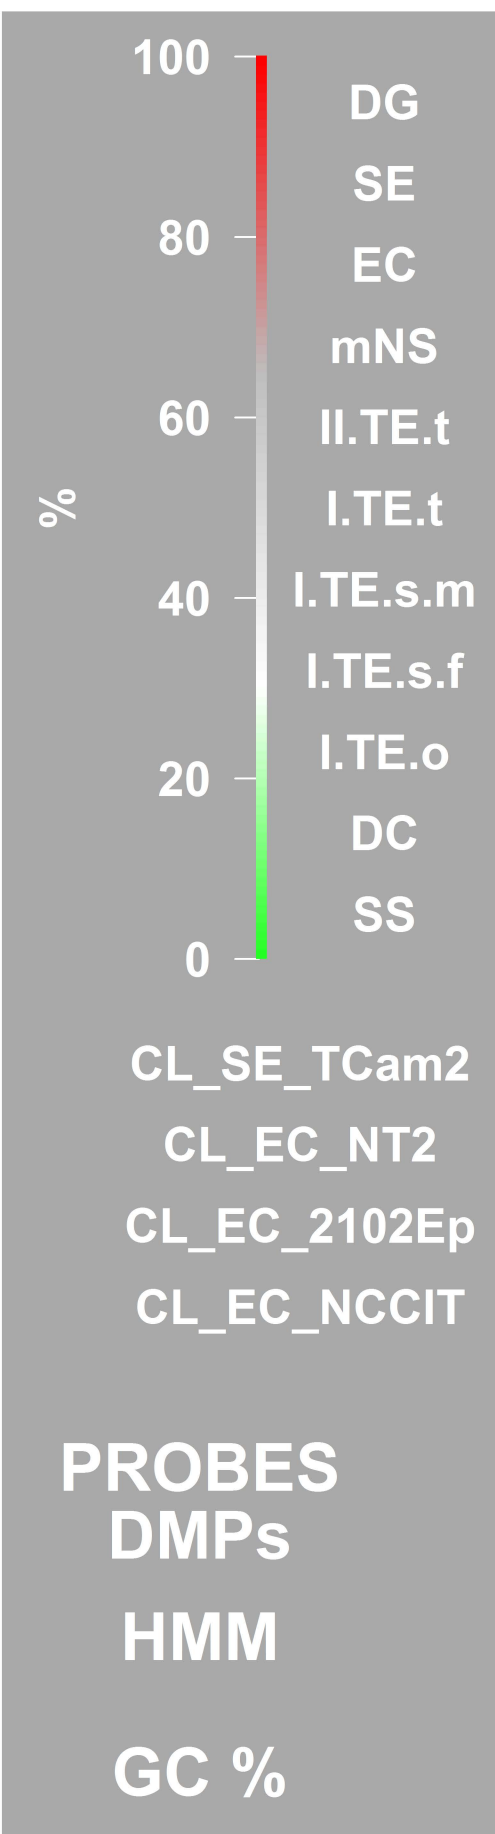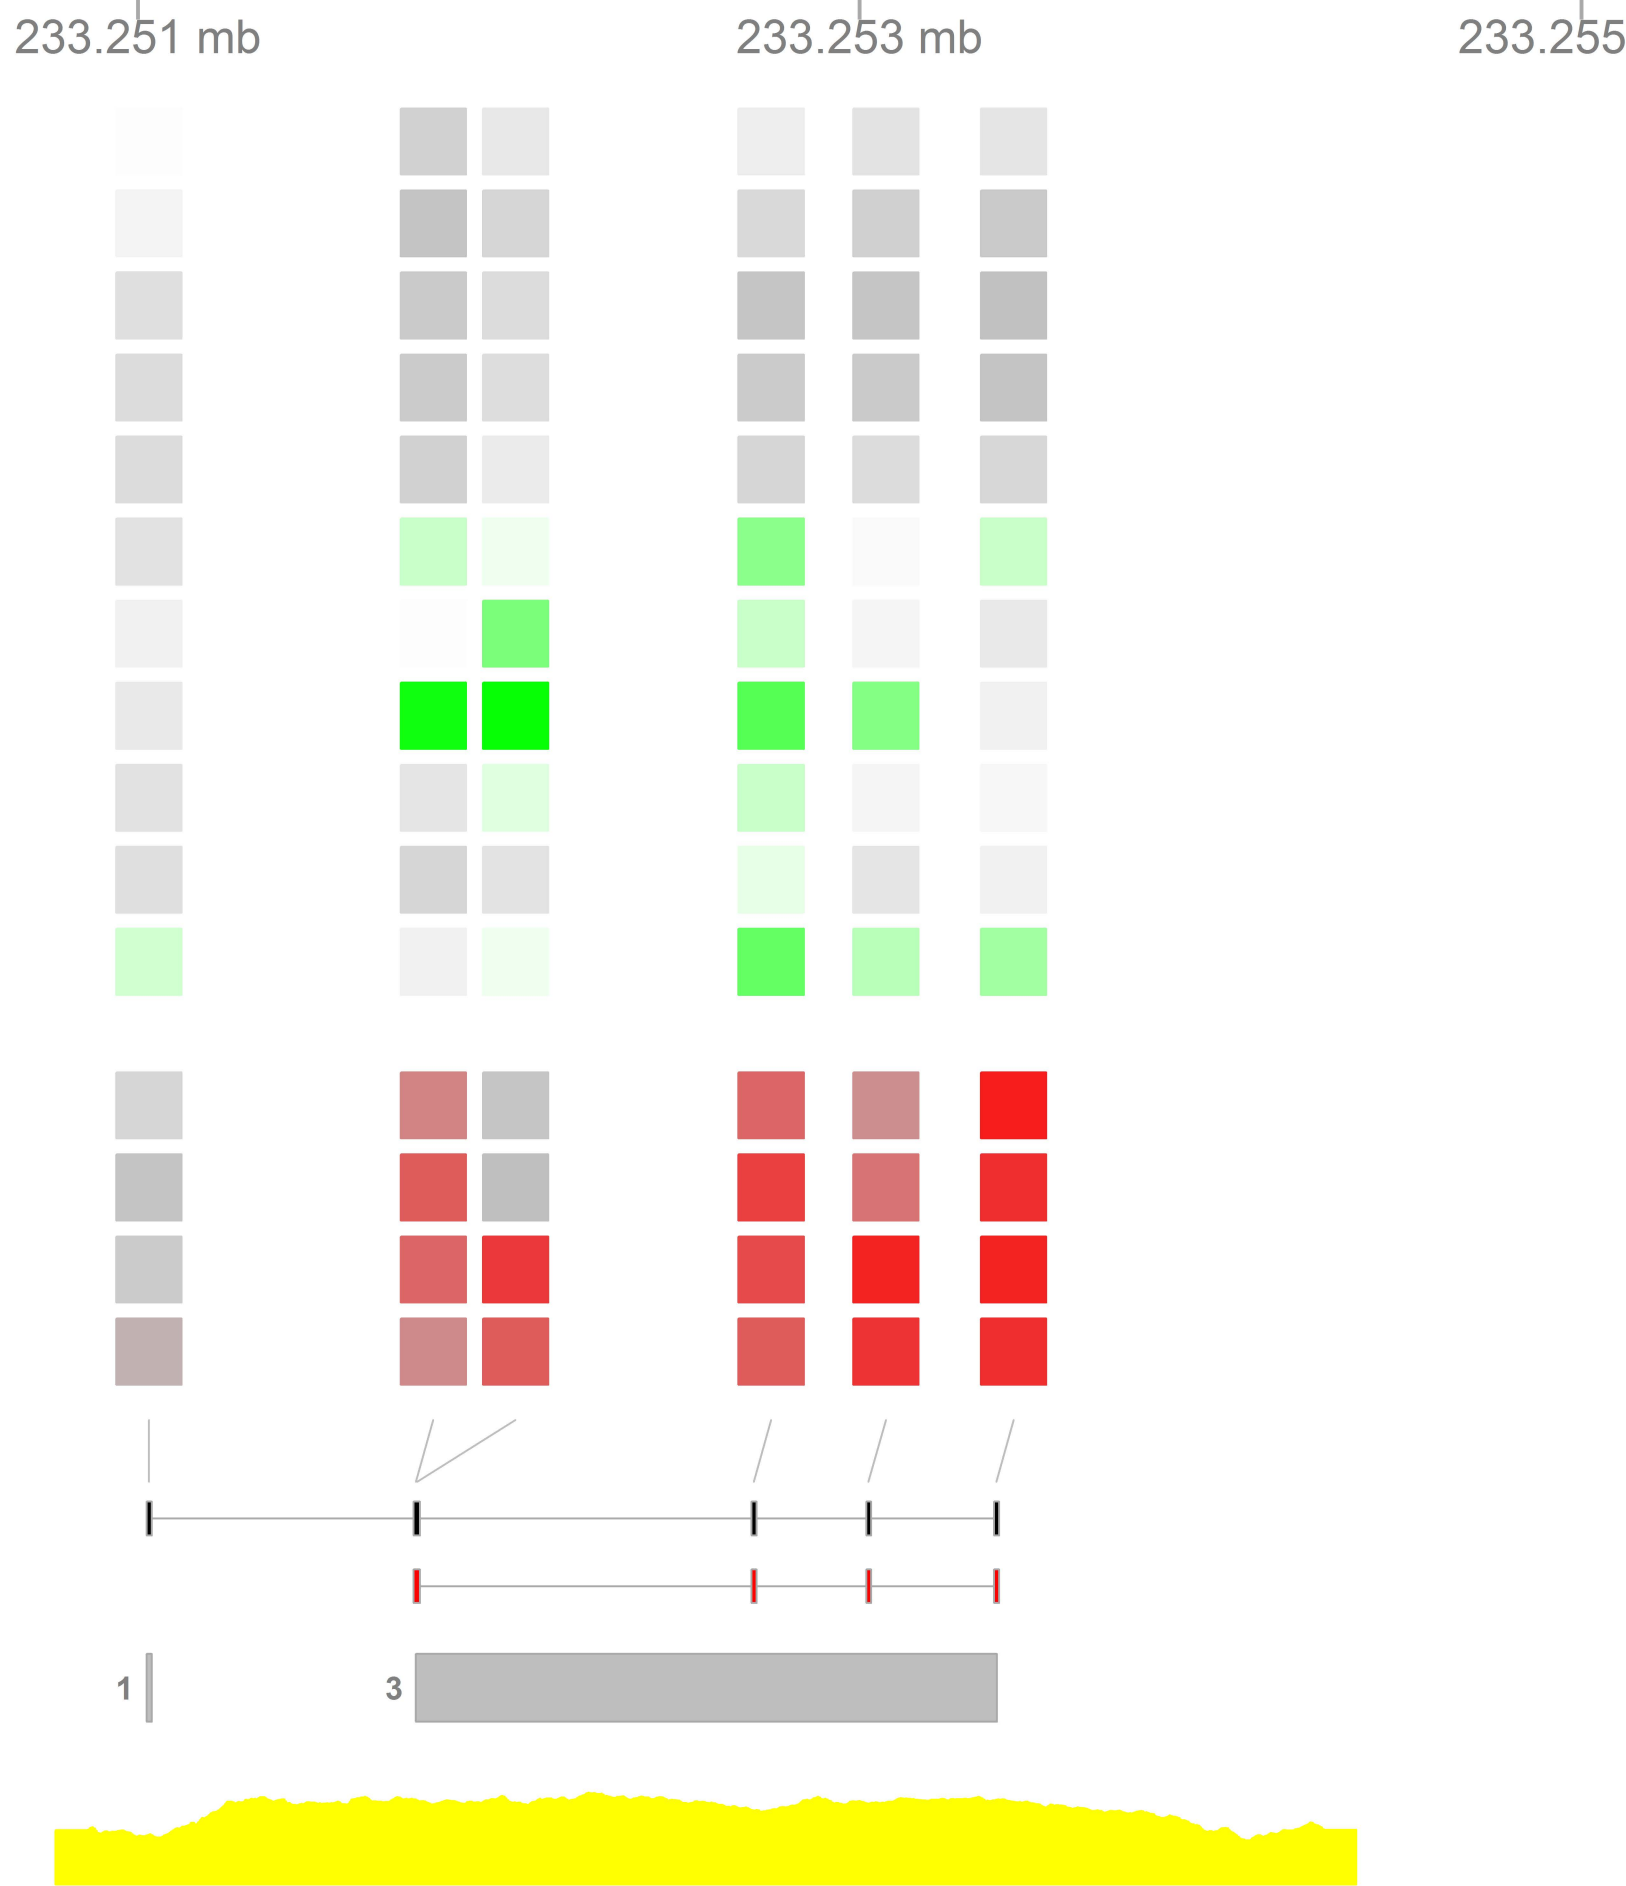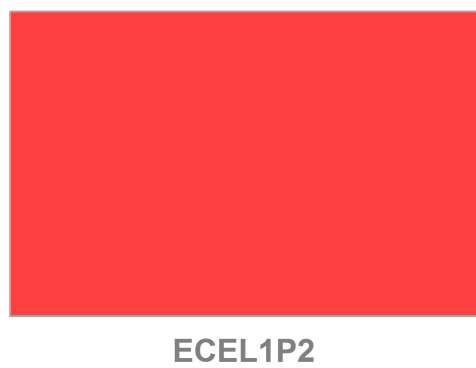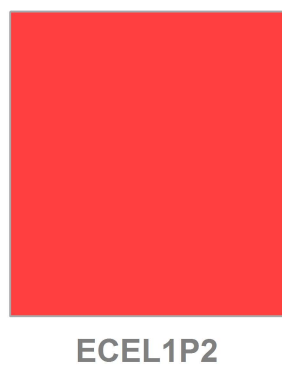

./clusters/cluster4\_SE\_DGvstype.I.TEhypermethylated\_SE\_DG\_chr12-125001007-125004558

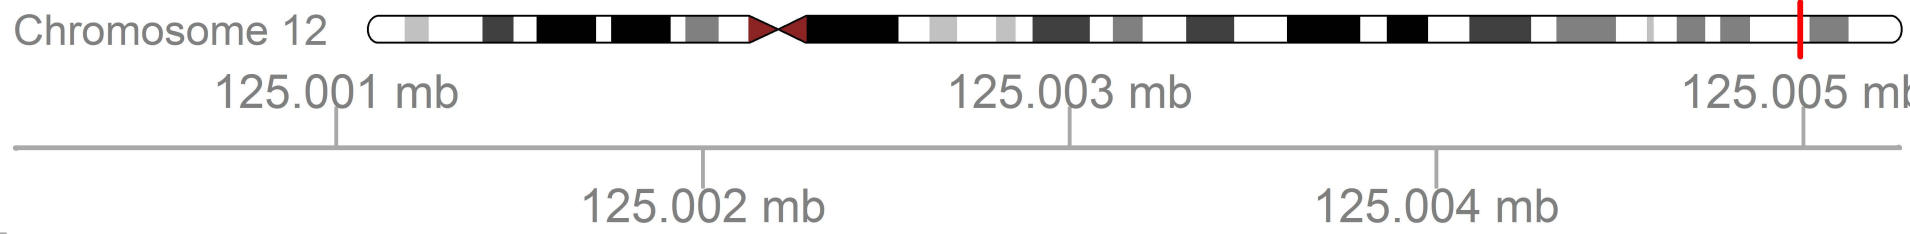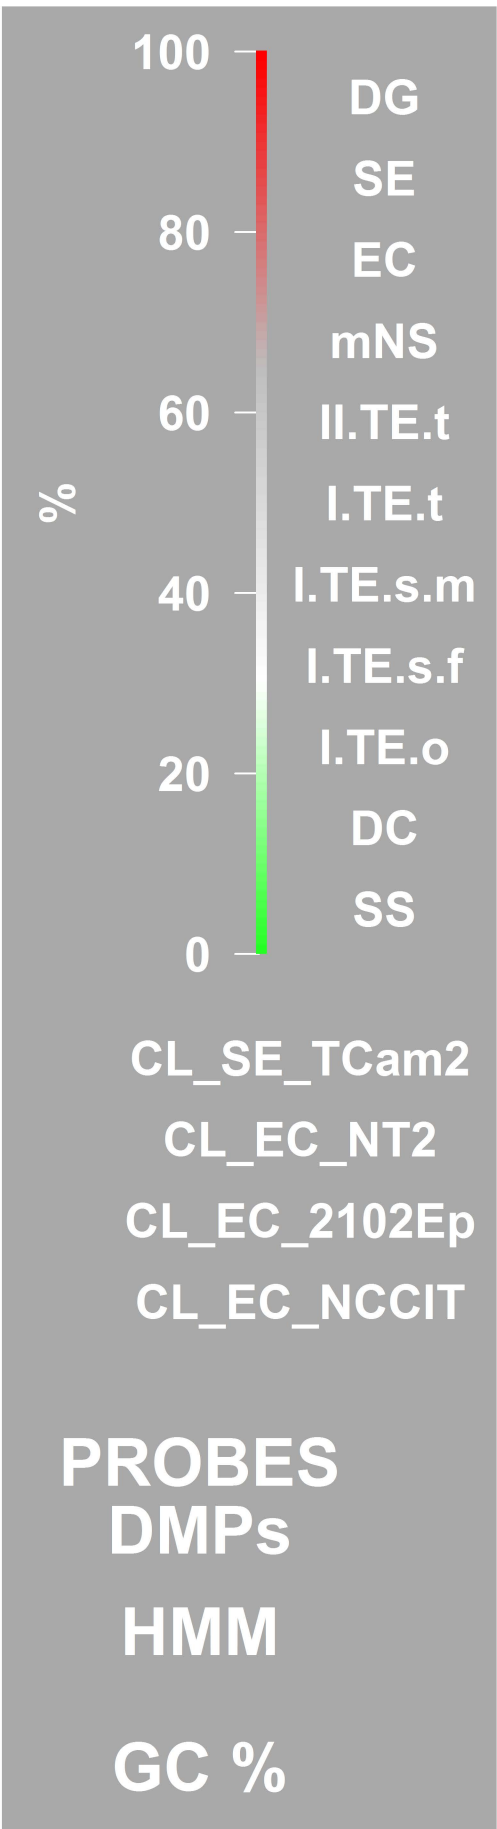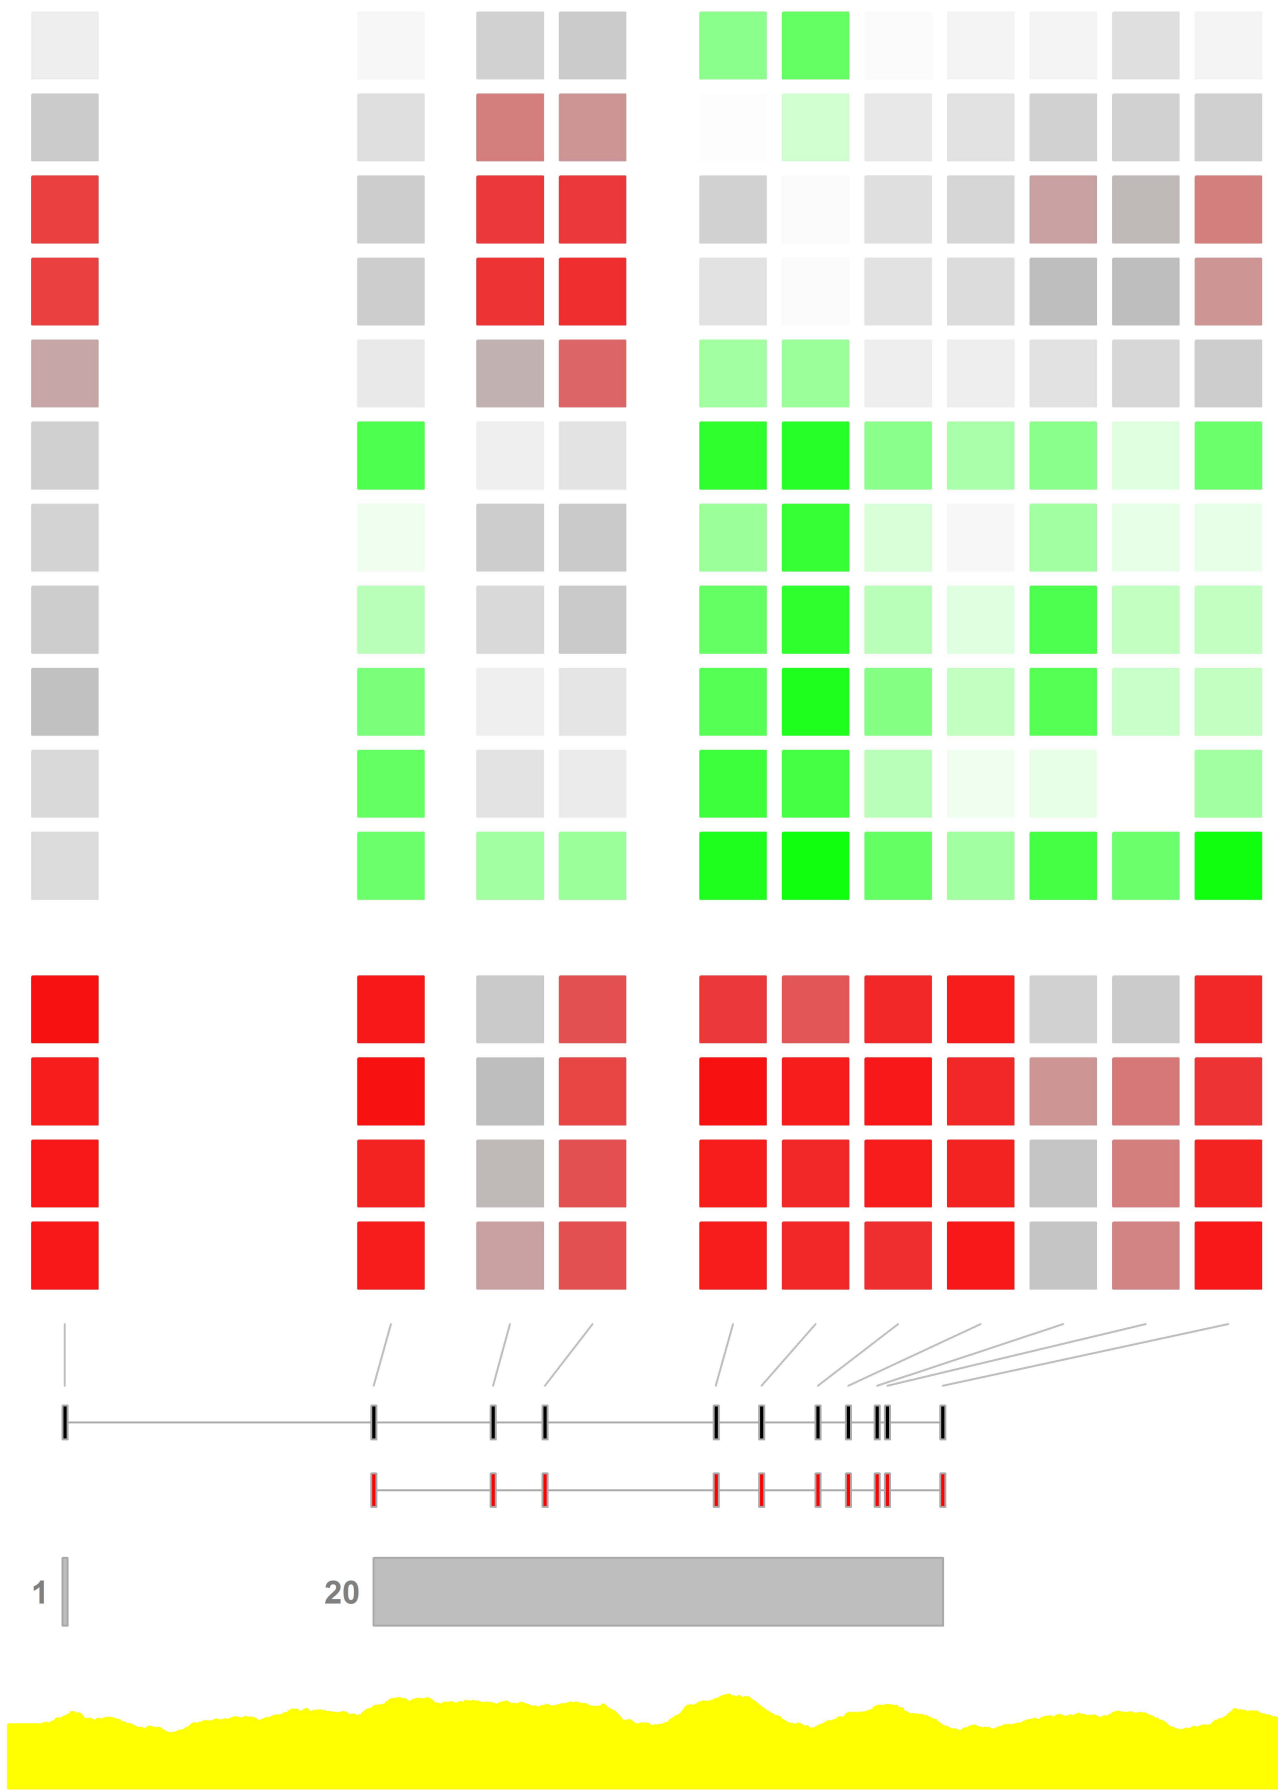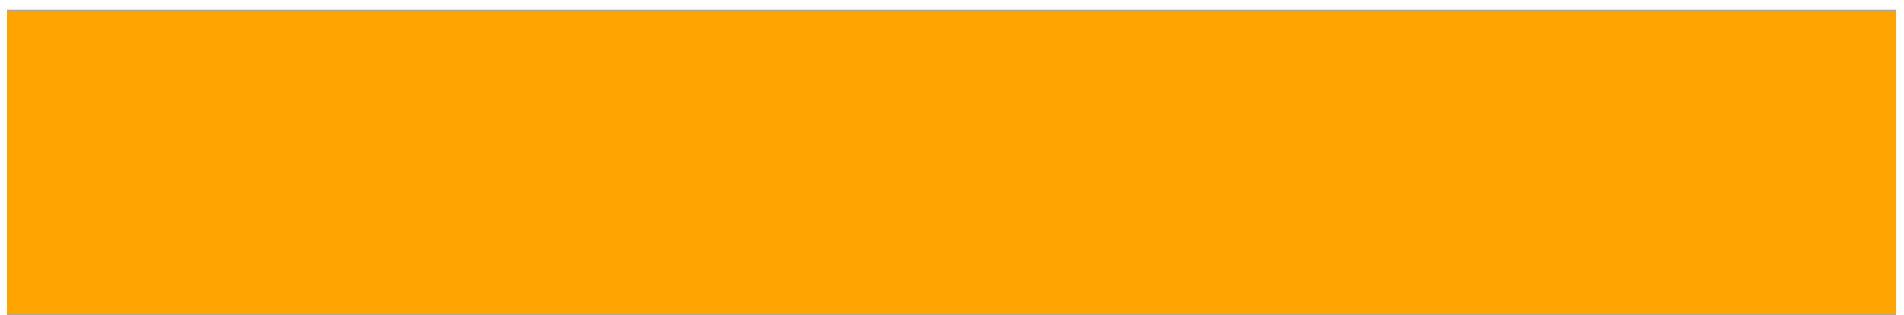

./clusters/cluster2247\_EC\_mNSvstype.I.TEhypermethylated\_EC\_mNS\_chr22-50584216-50586427

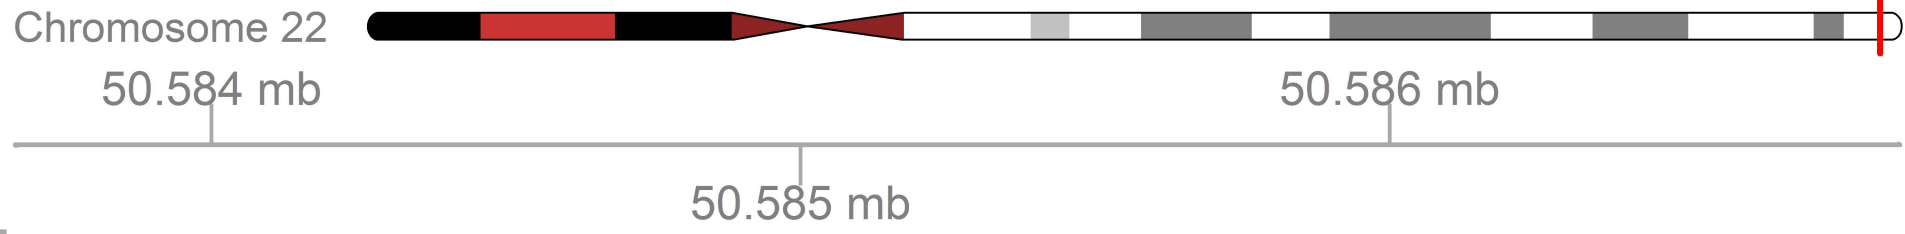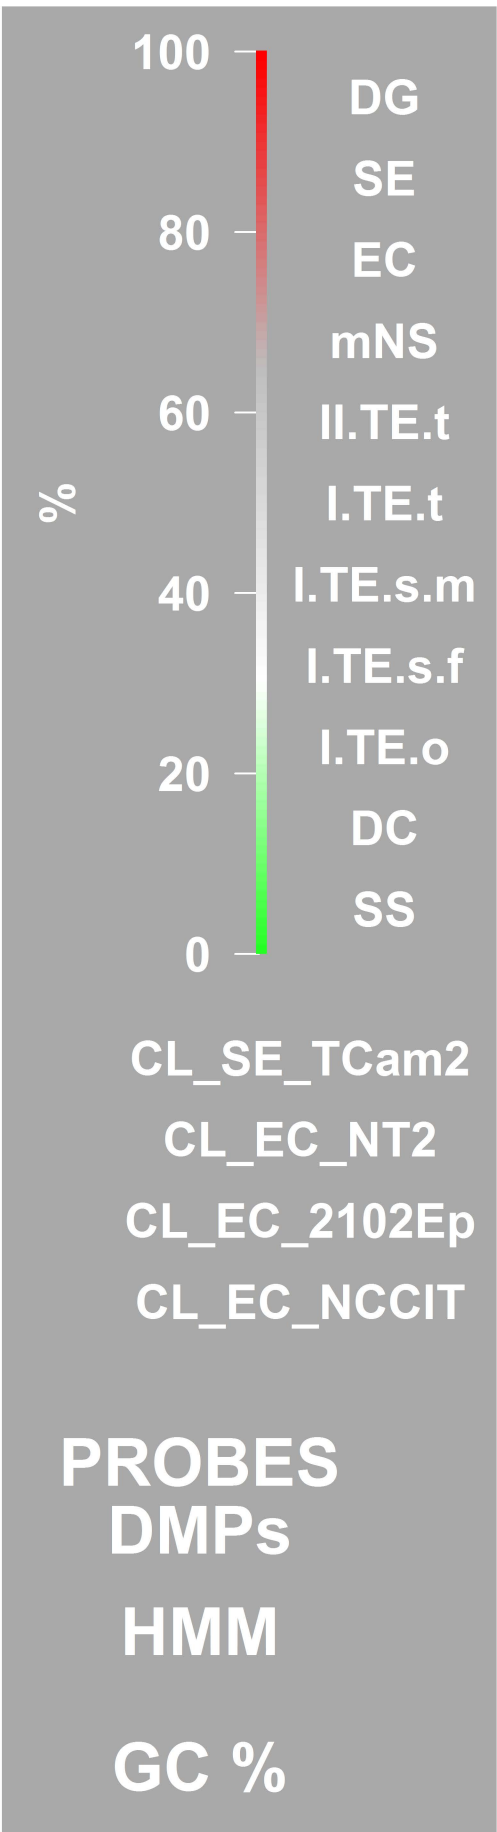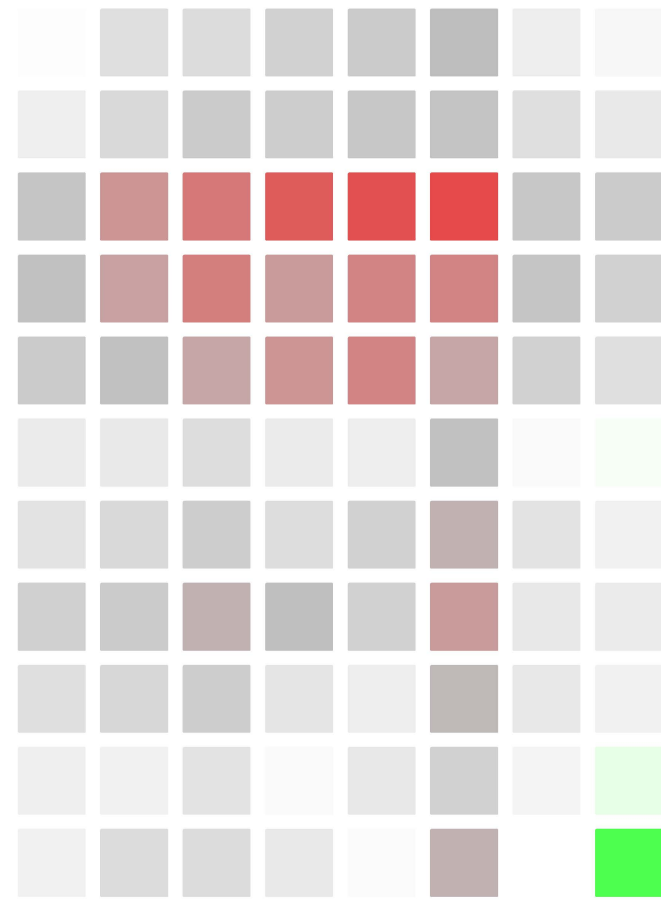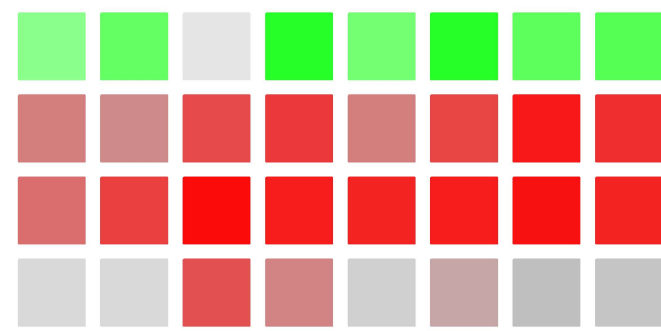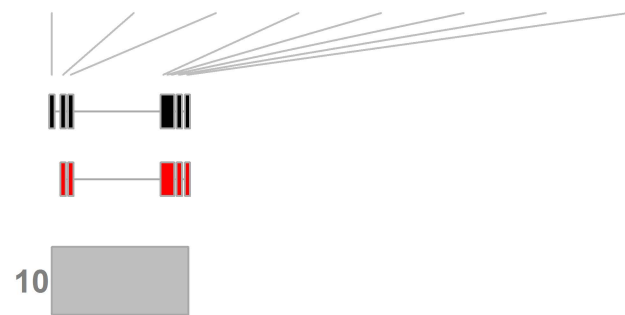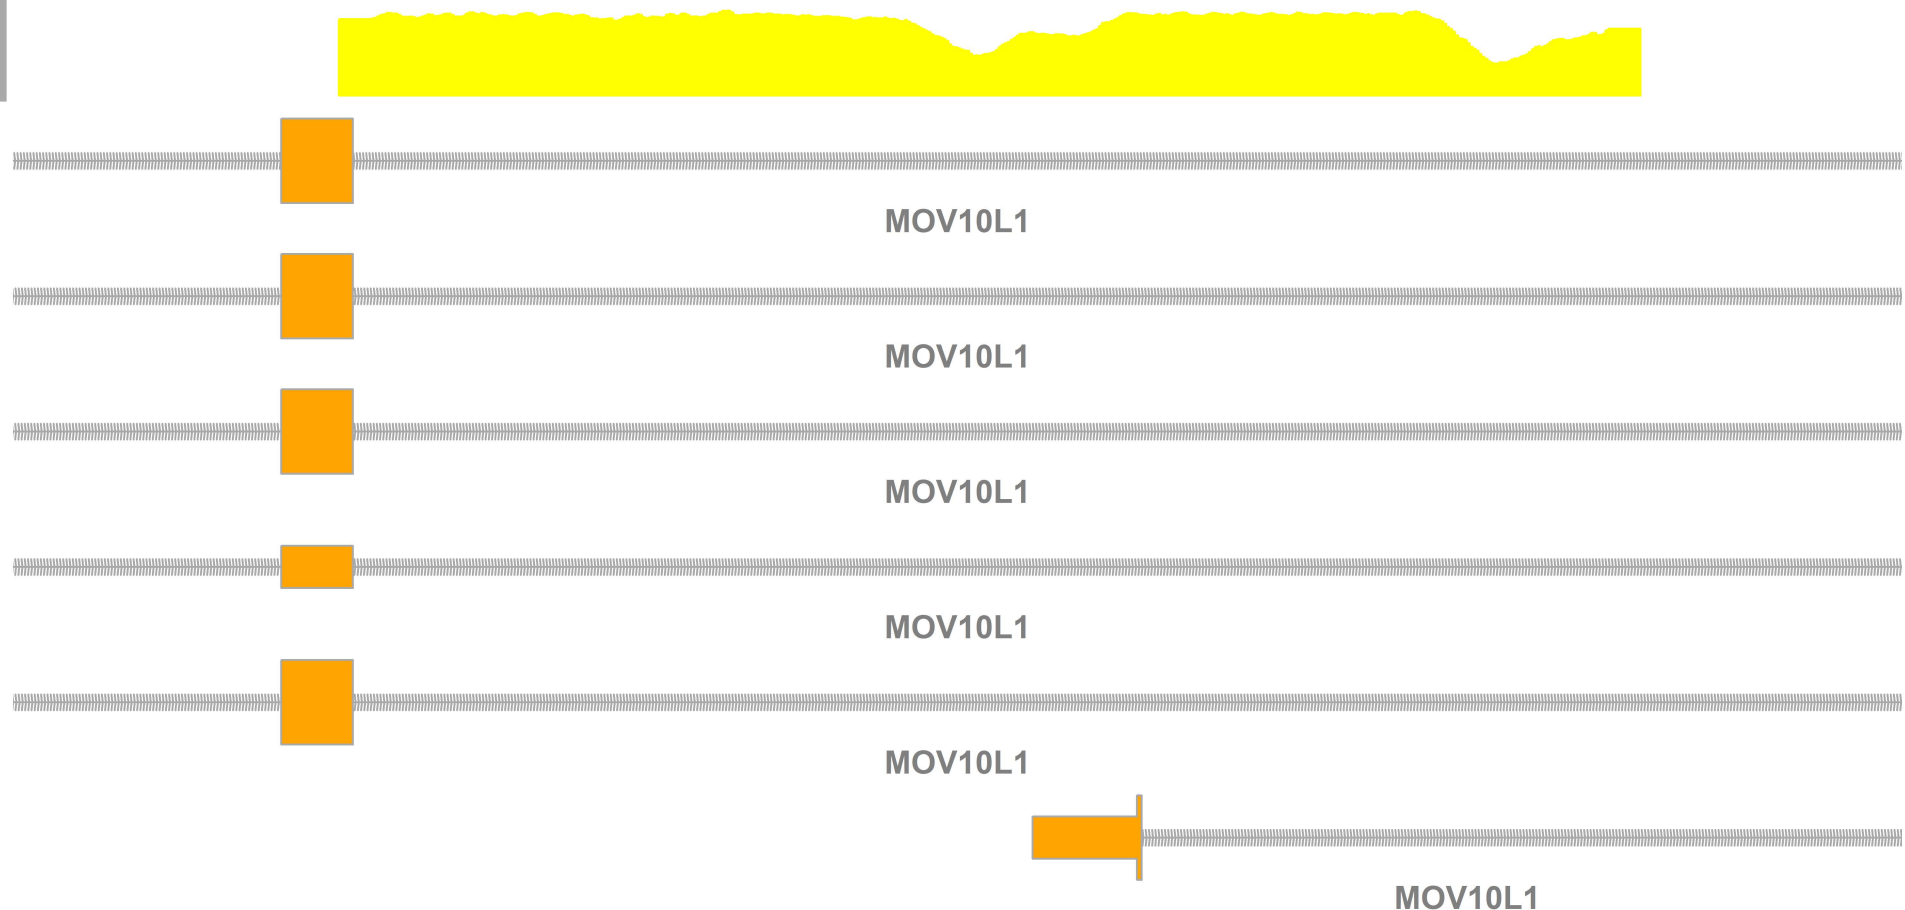



./clusters/cluster272\_EC\_mNSvstype.I.TEhypermethylated\_EC\_mNS\_chr1-162600334-162603295

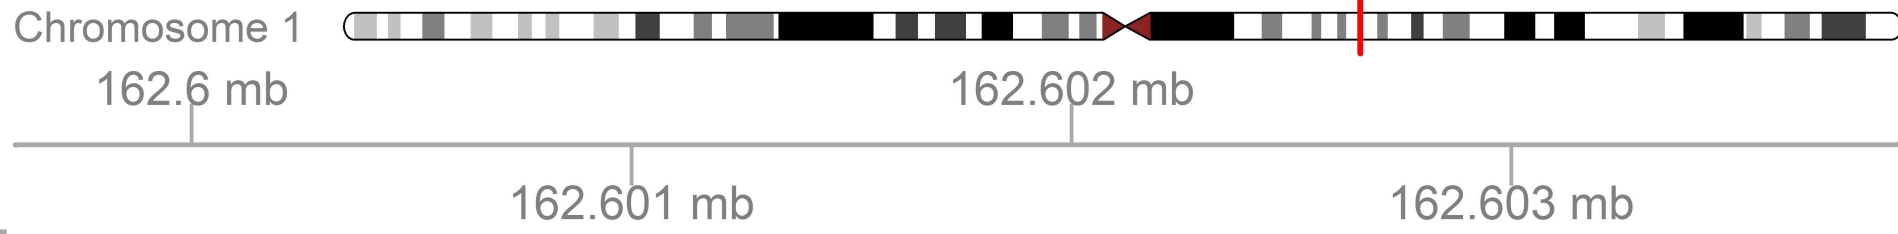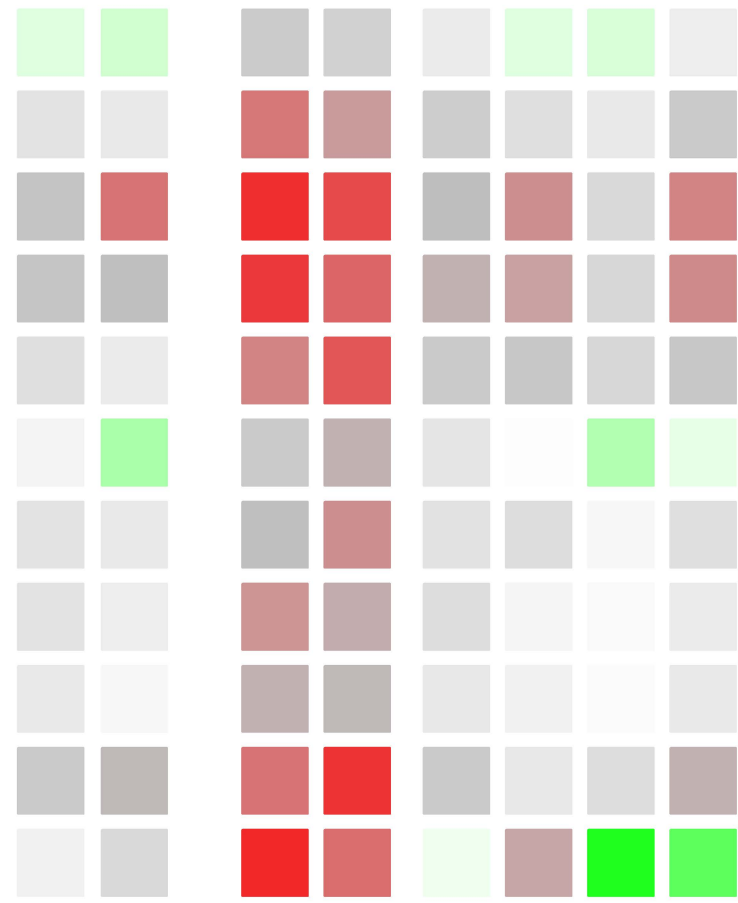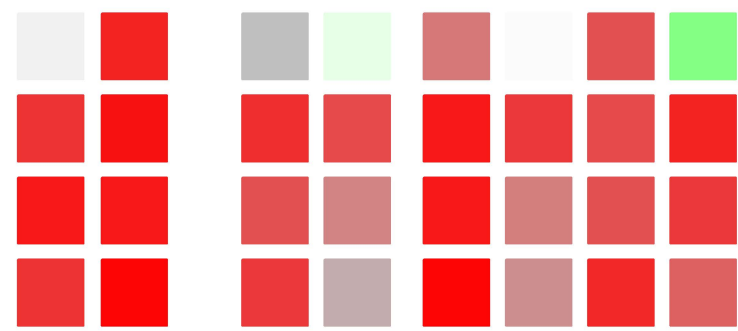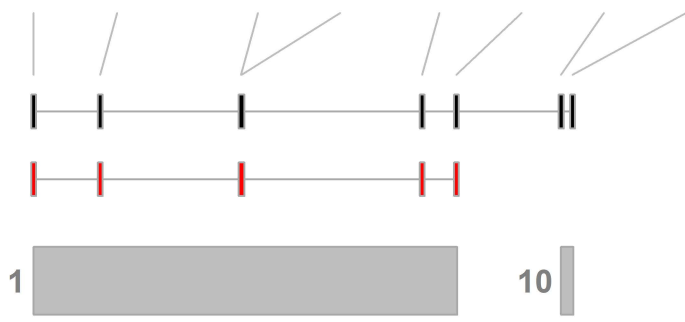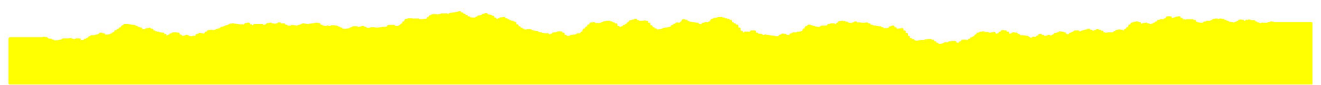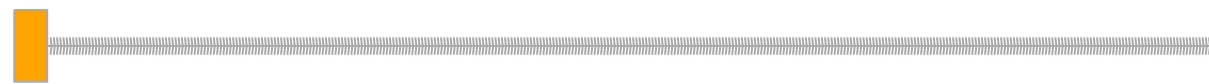

DDR2

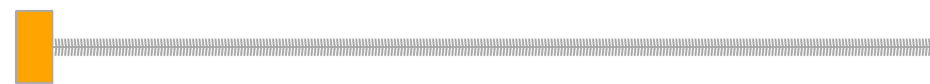

DDR2

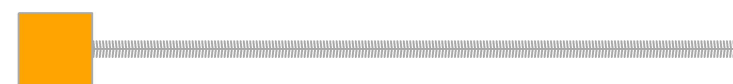

DDR2

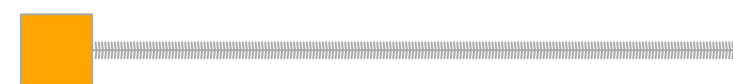

DDR2

./clusters/cluster30\_EC\_mNSvstype.I.TEhypermethylated\_type.I.TE\_chr16-54969523-54974579

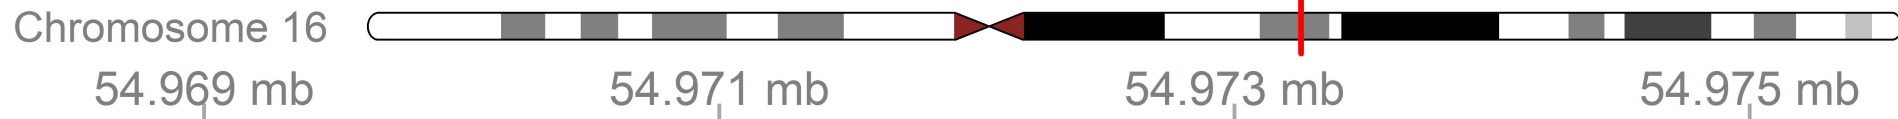

54.97 mb      54.972 mb      54.974 mb

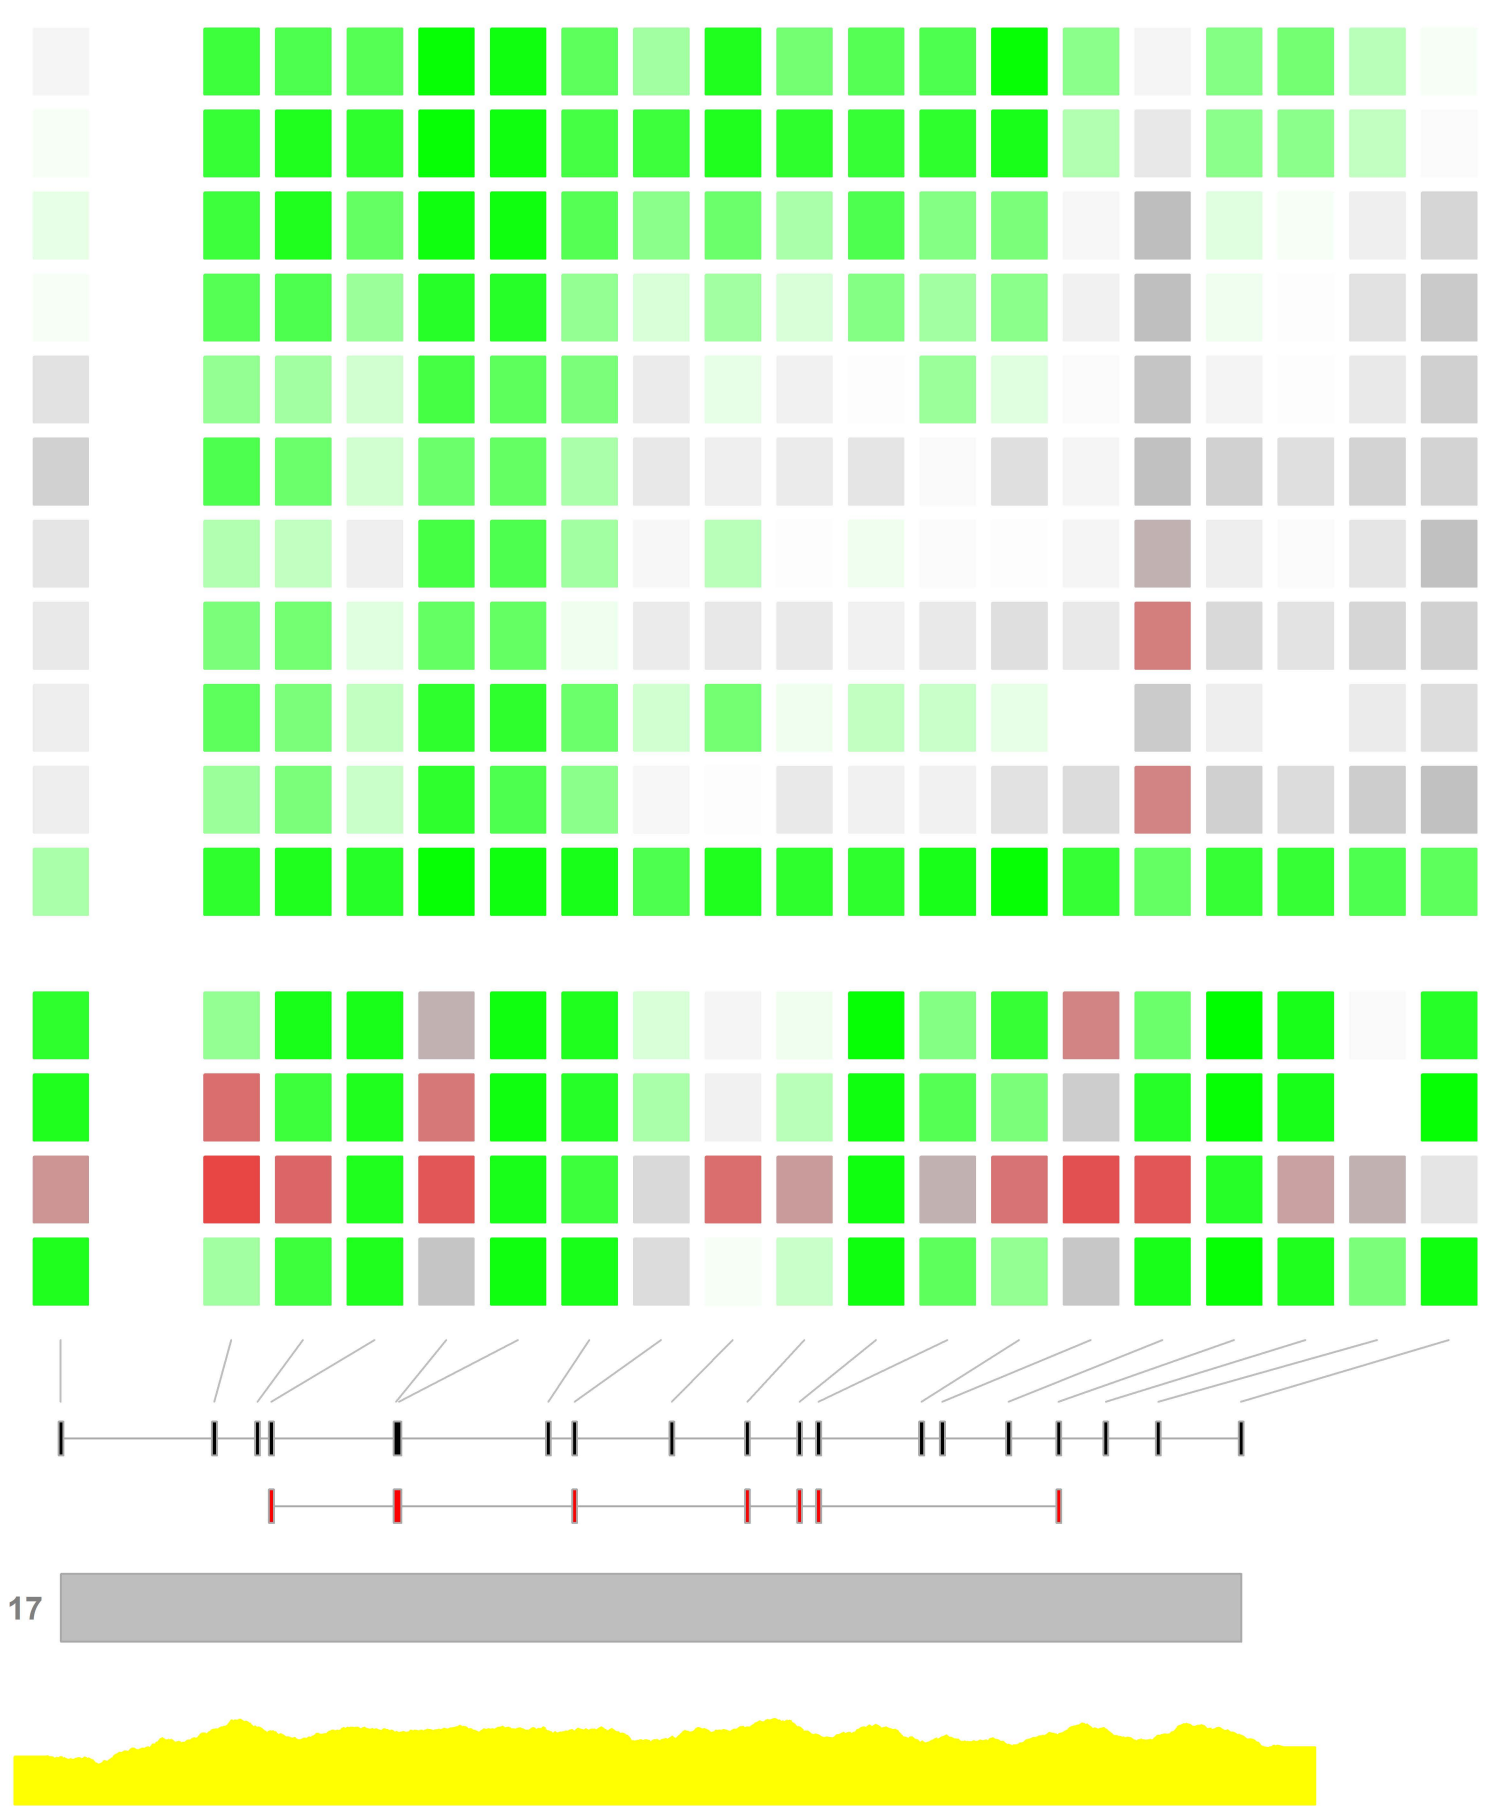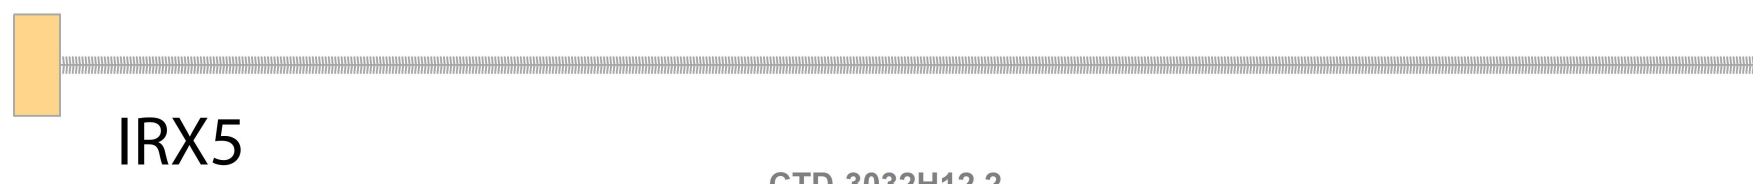

CTD-3032H12.2

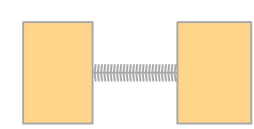

CTD-3032H12.1

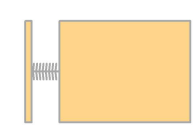

CTD-3032H12.1

**./clusters/cluster3238\_EC\_mNSvstype.I.TEhypermethylated\_EC\_mNS\_chr9-973533-976997**

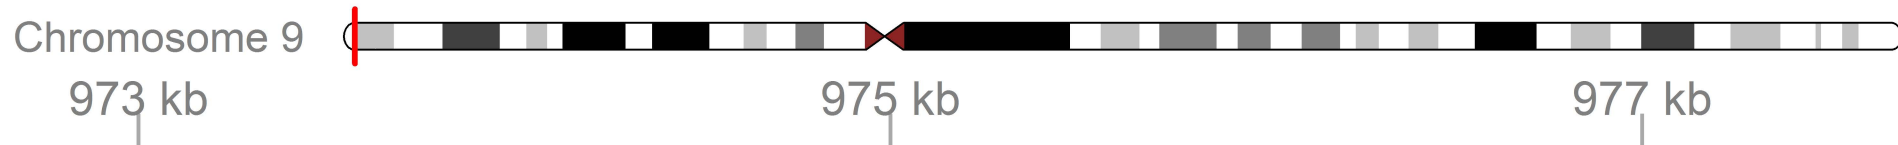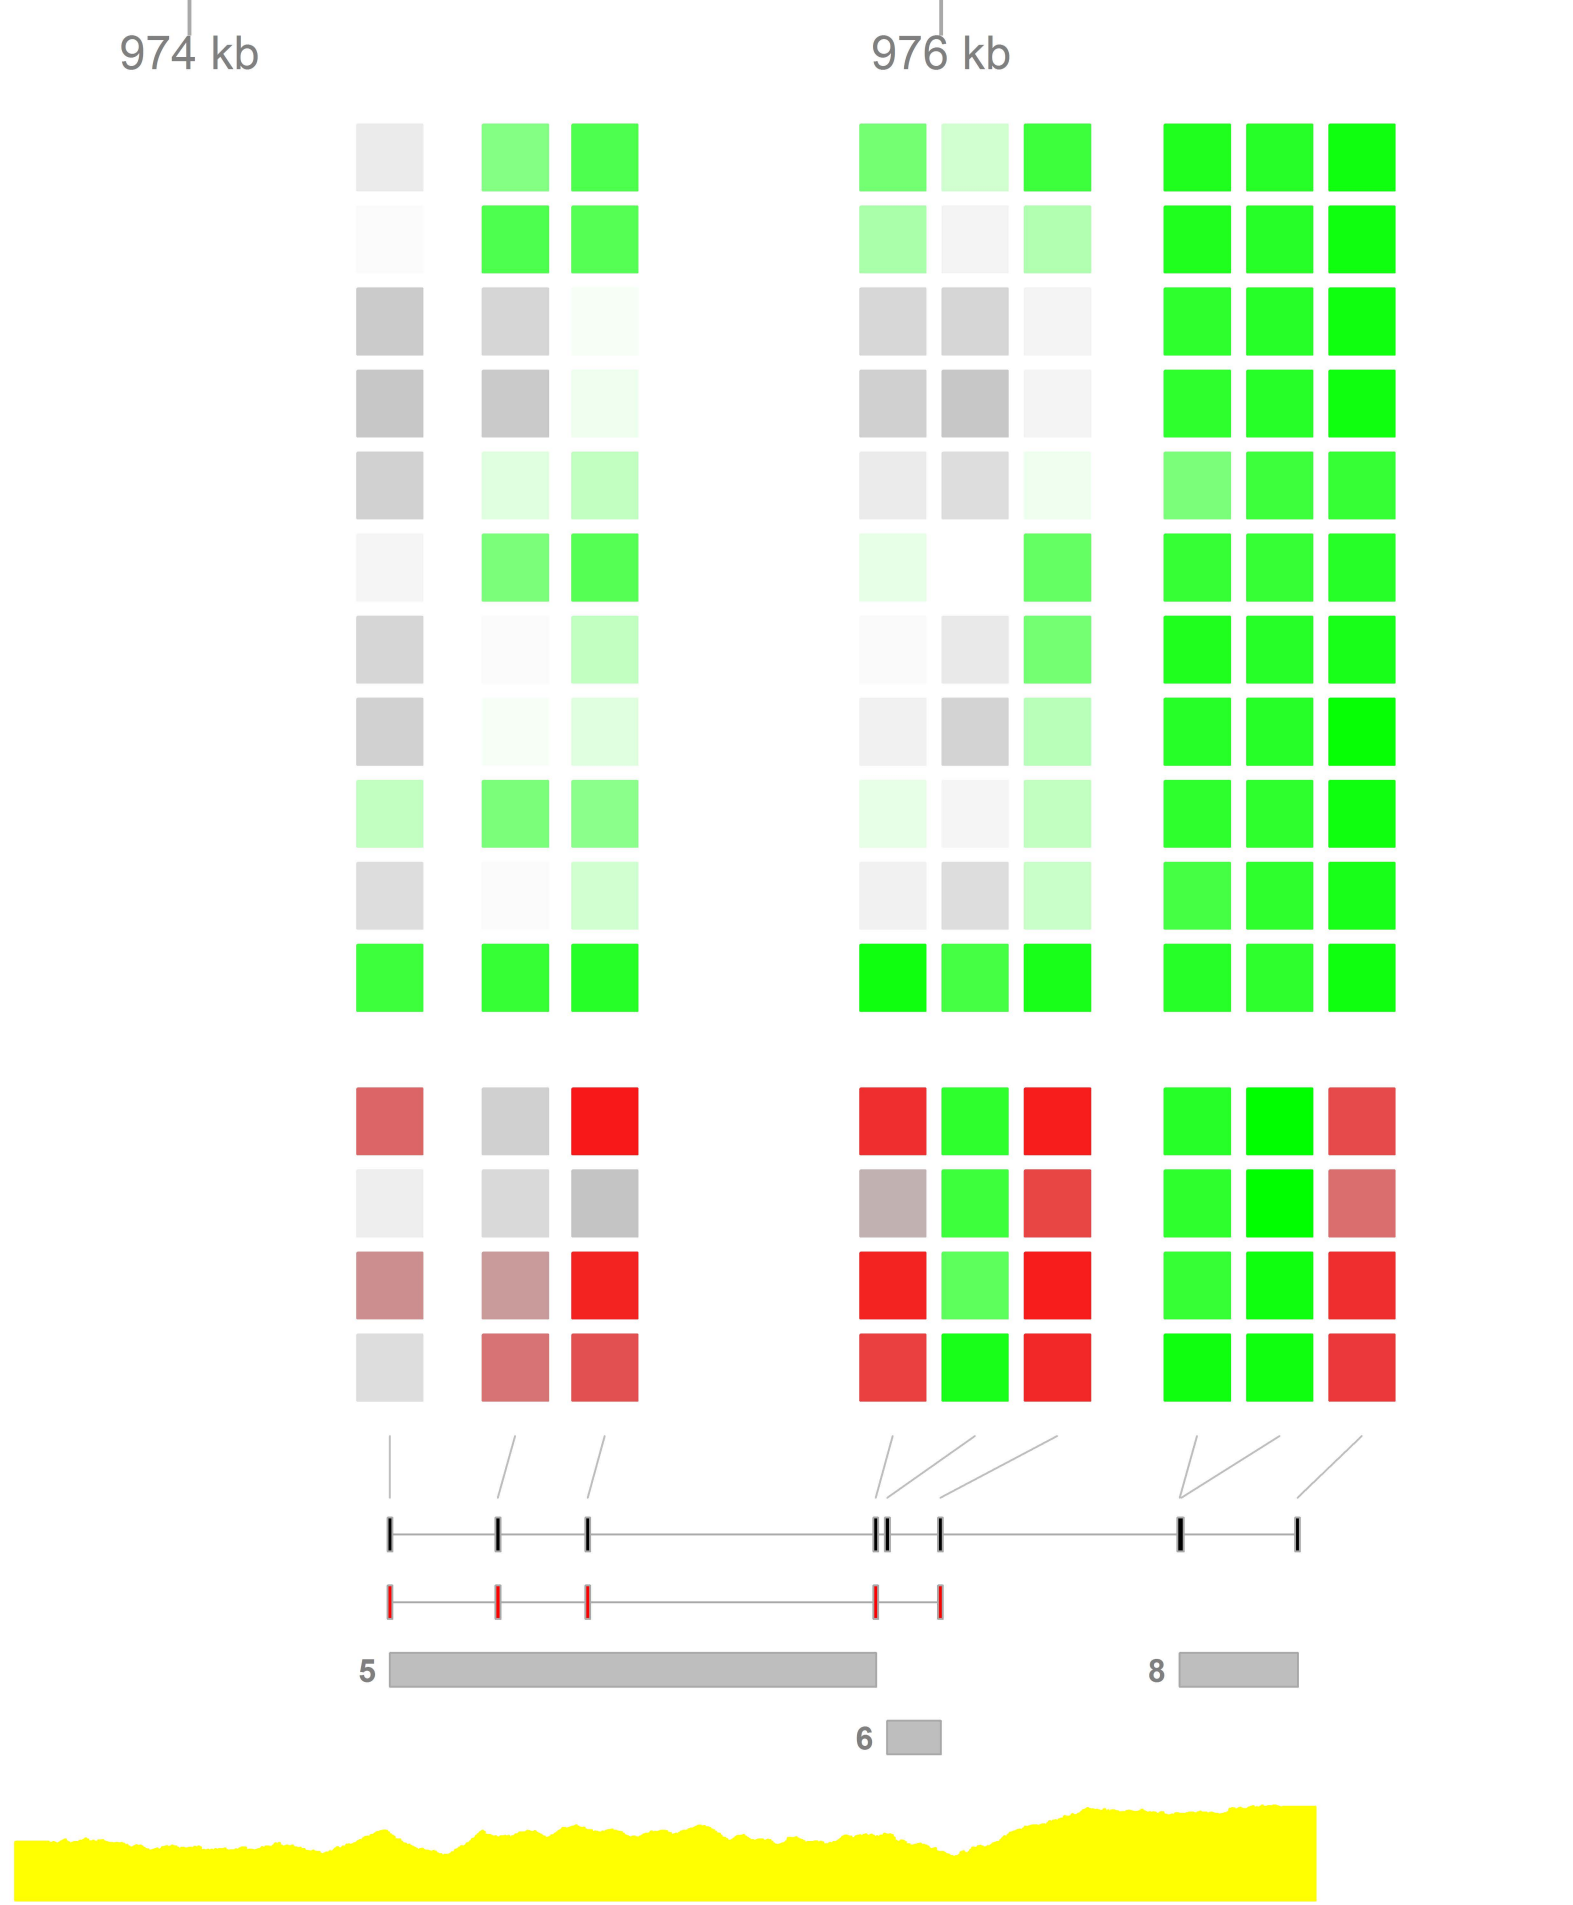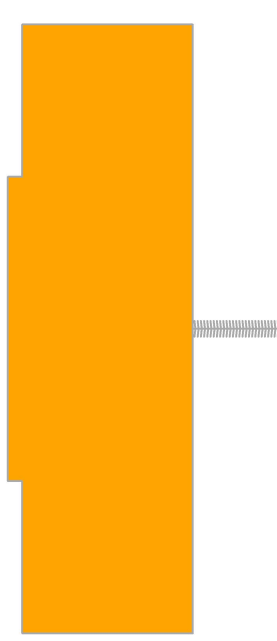

./clusters/cluster51\_EC\_mNSvstype.I.TEhypermethylated\_type.I.TE\_chr3-181427280-181429563

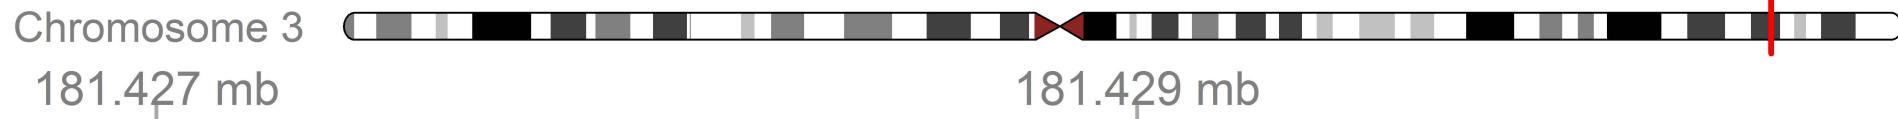

181.428 mb

181.43 mb

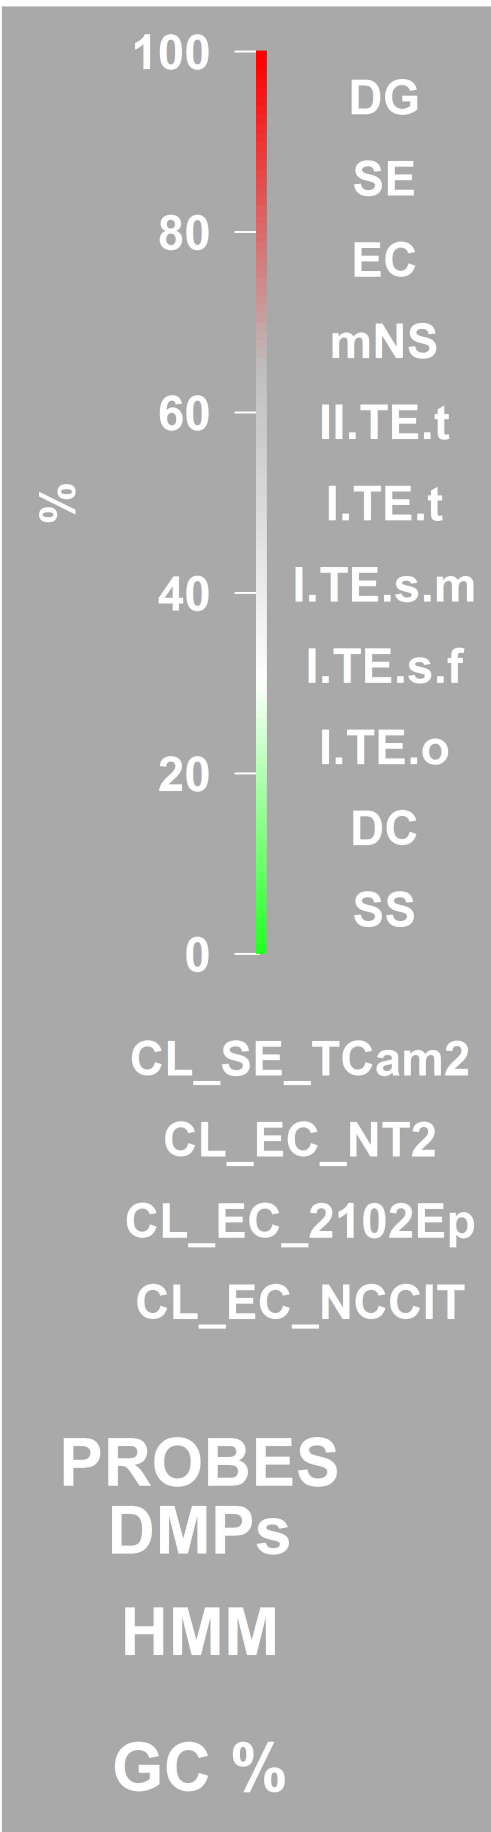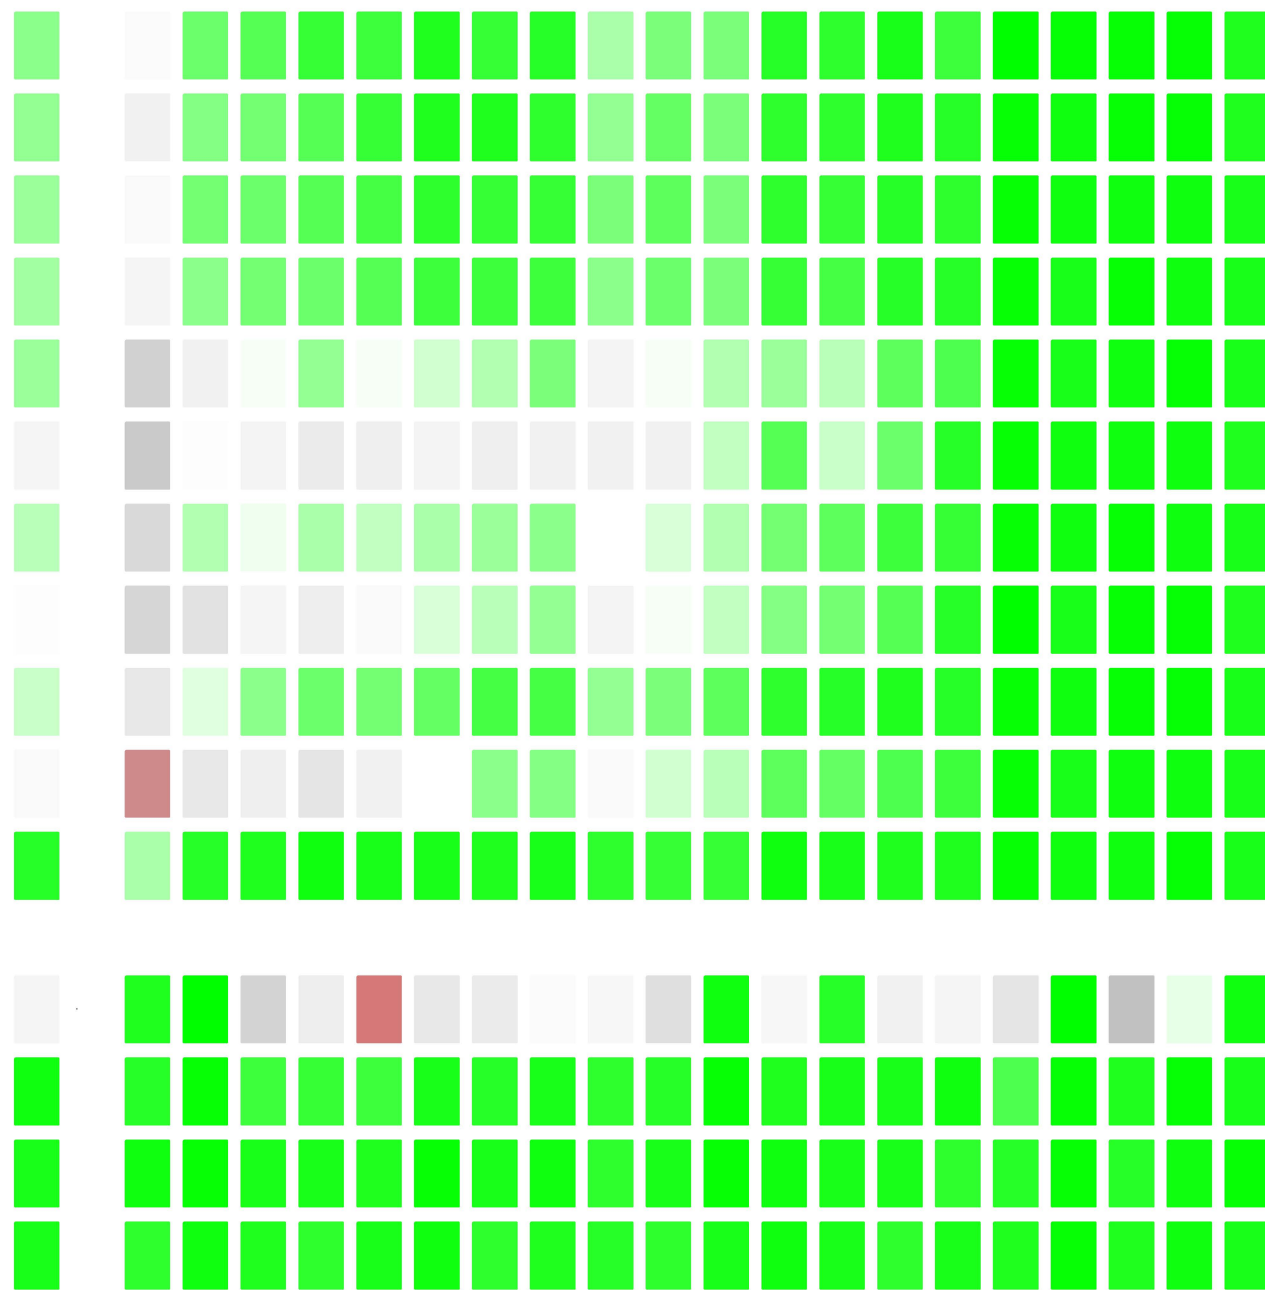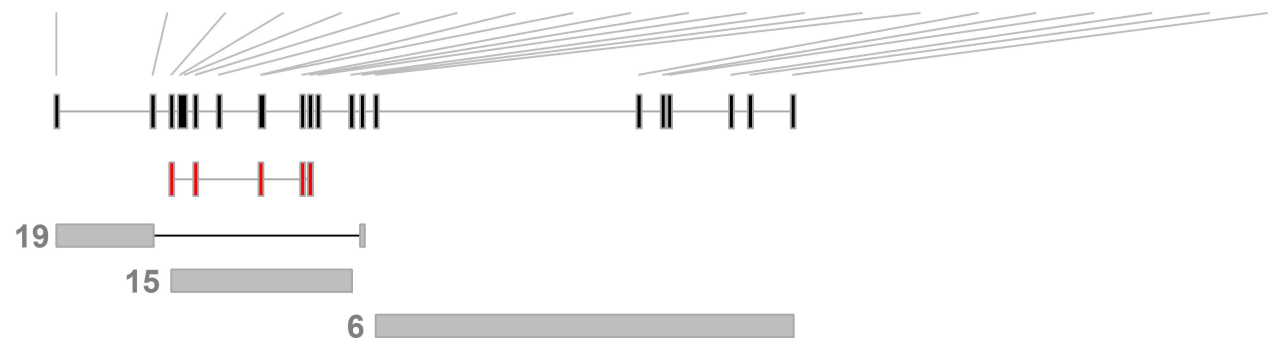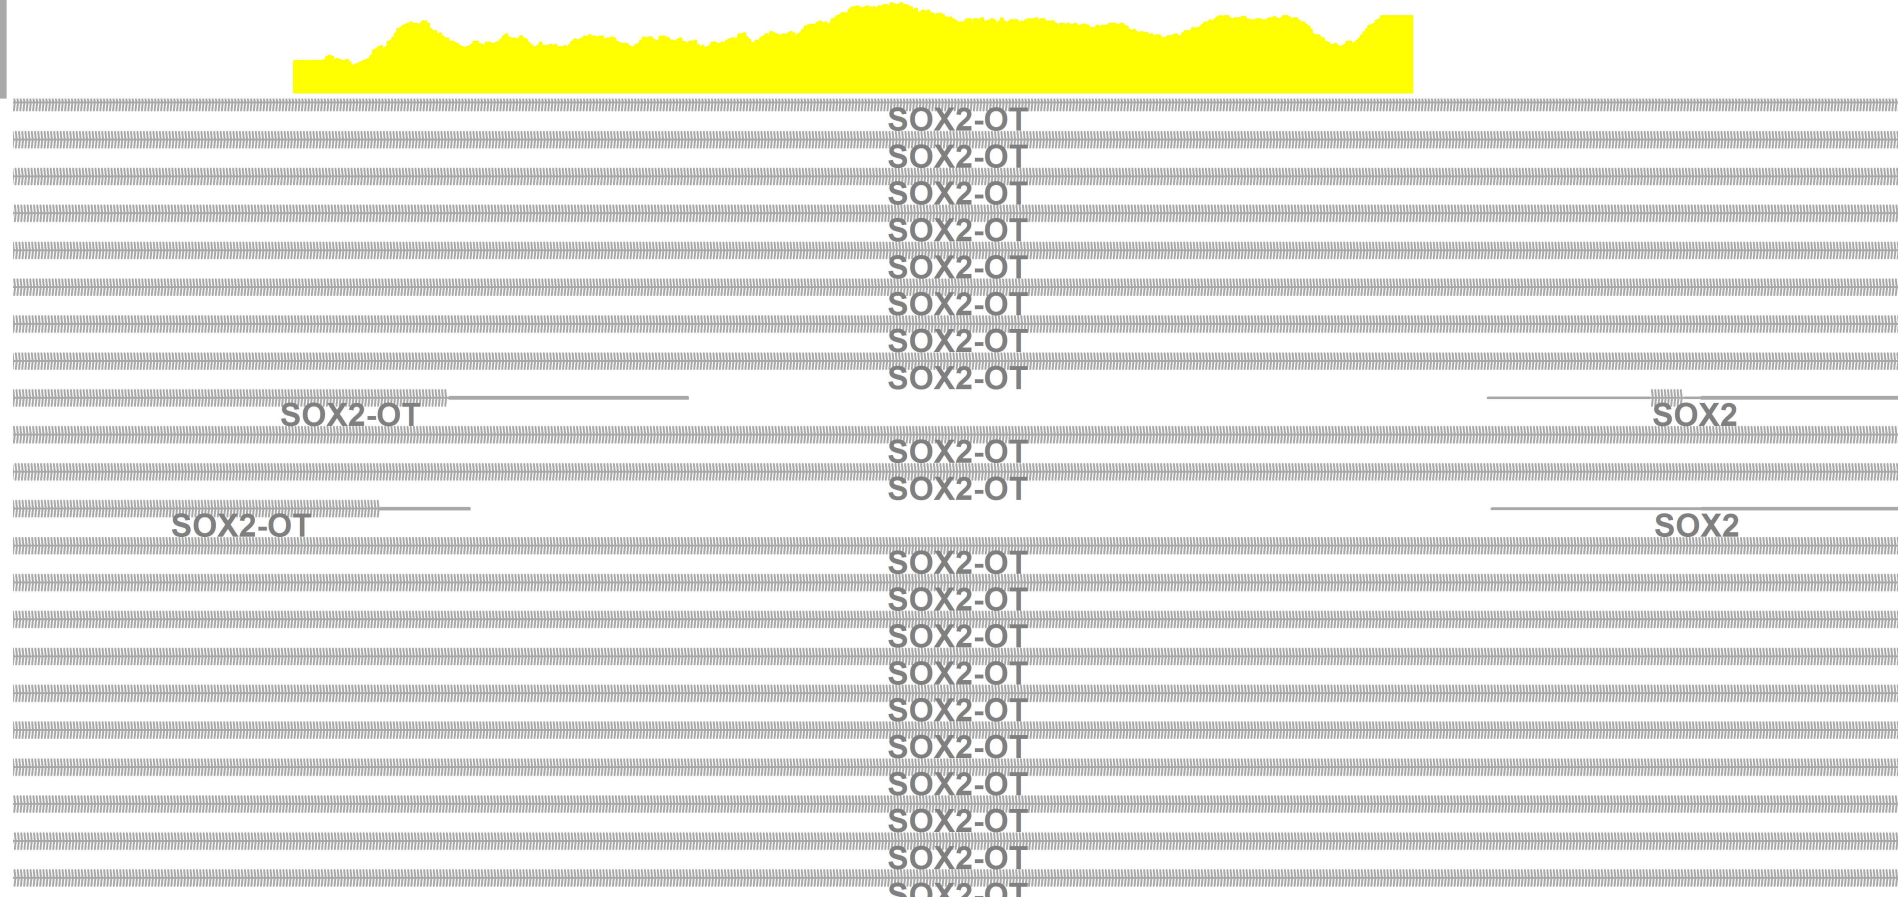

**./clusters/cluster53\_EC\_mNSvstype.I.TEhypermethylated\_type.I.TE\_chr4-4866102-4869723**

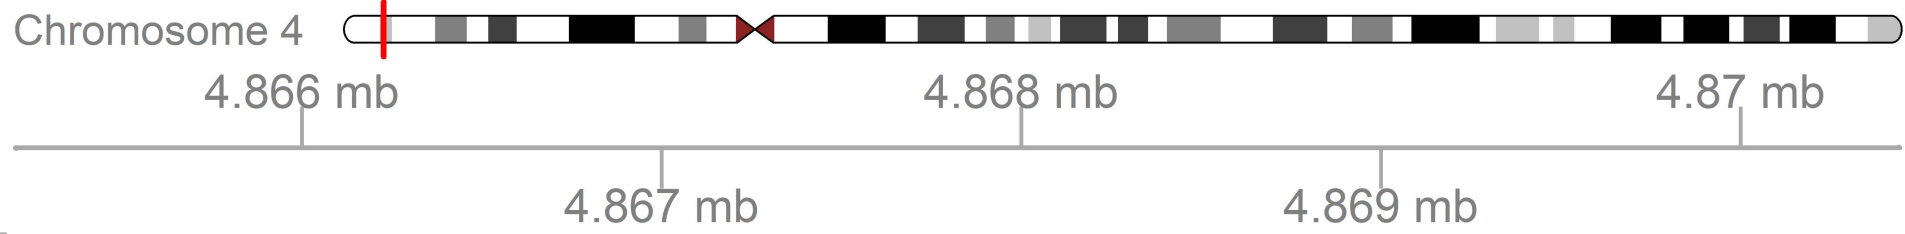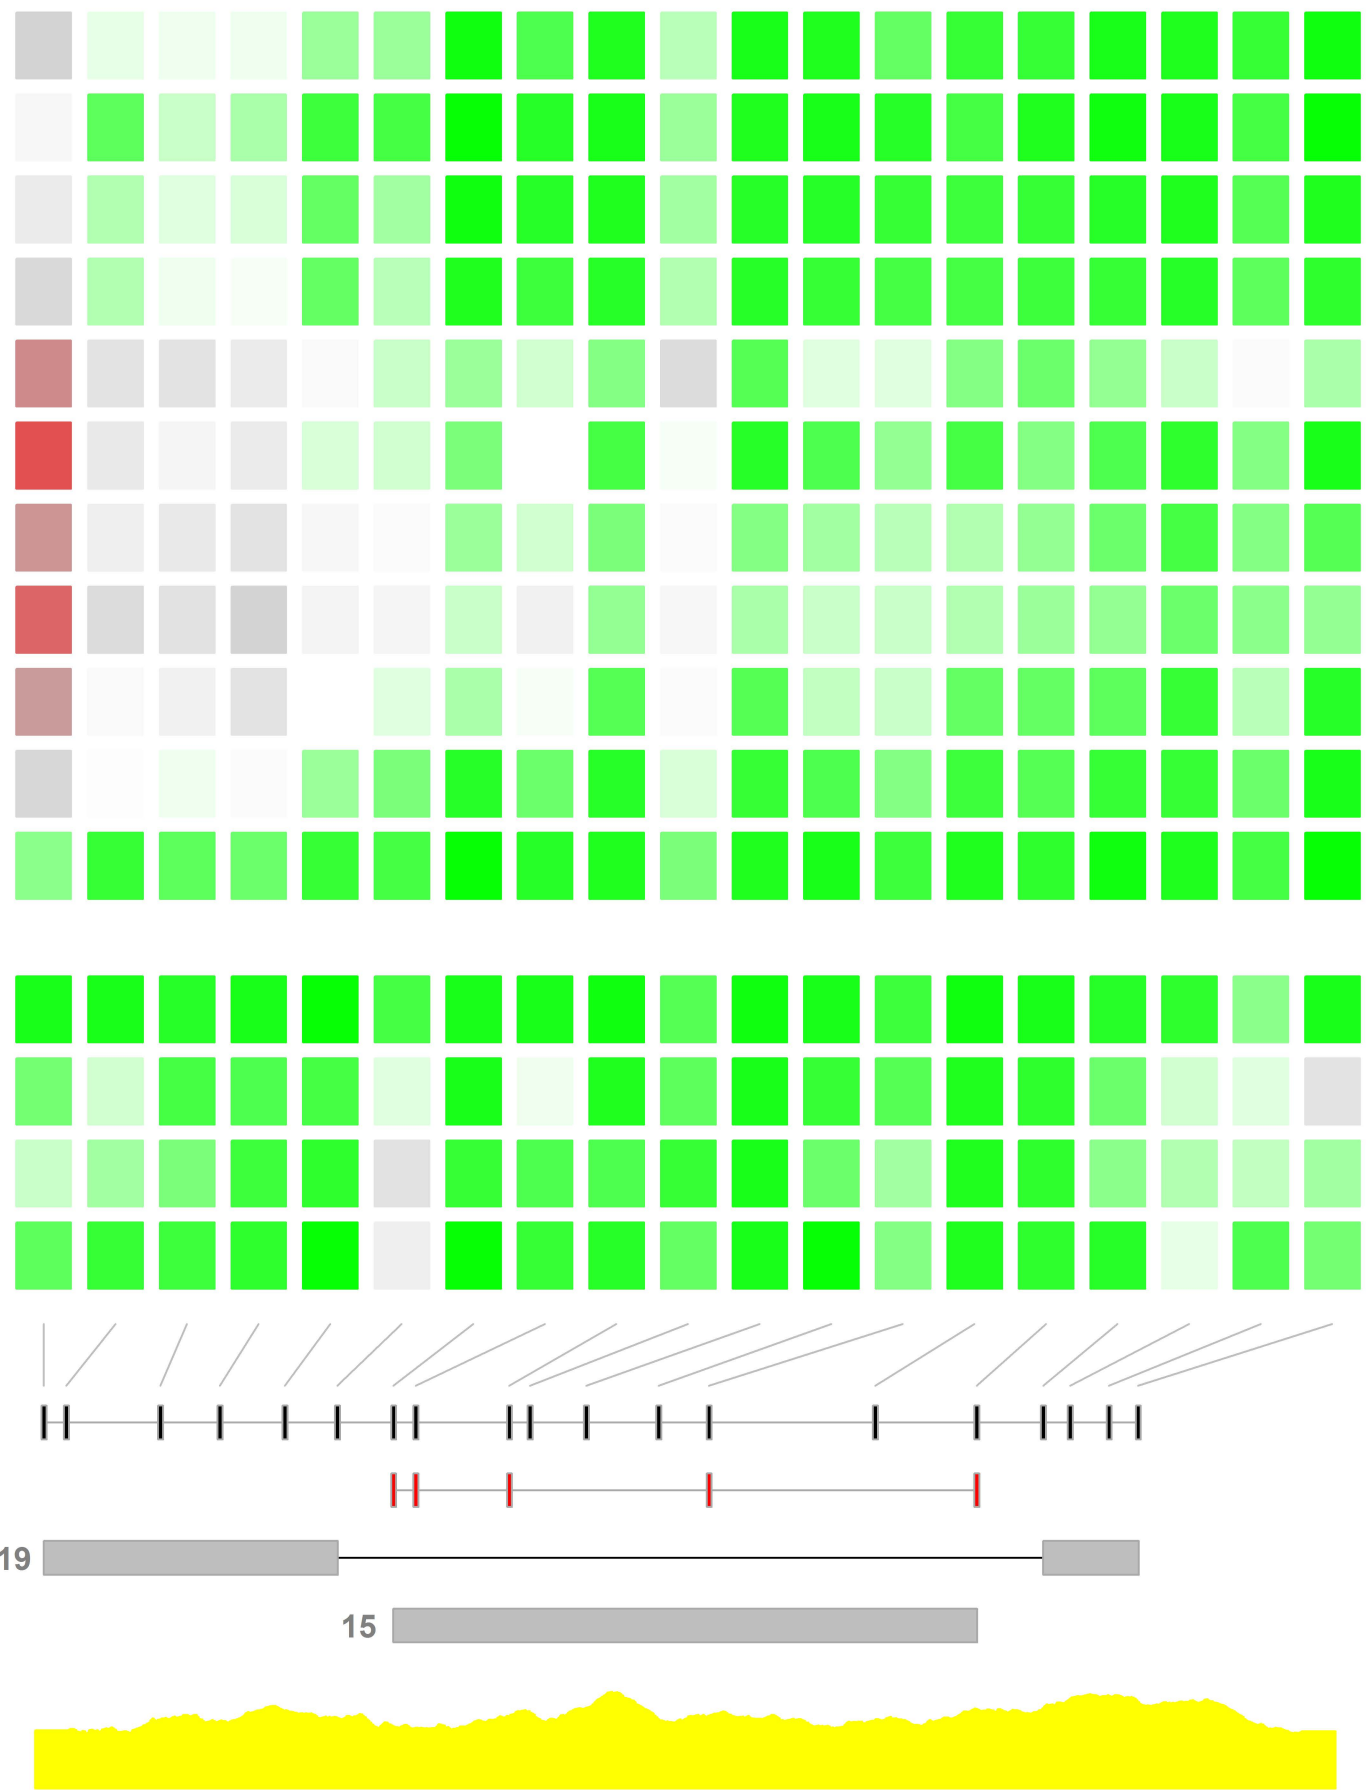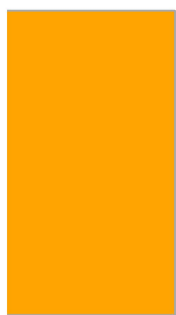

**./clusters/cluster605\_EC\_mNSvstype.I.TEhypermethylated\_EC\_mNS\_chr11-32453718-32456735**

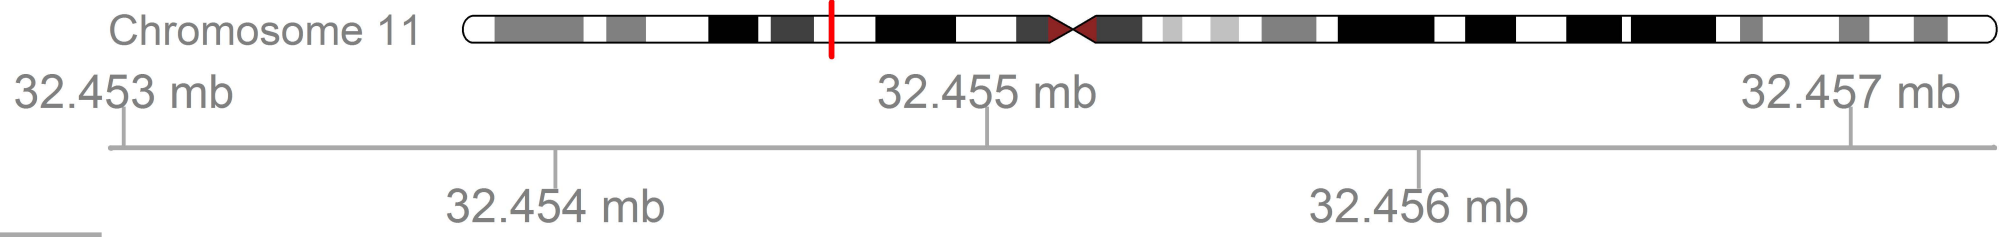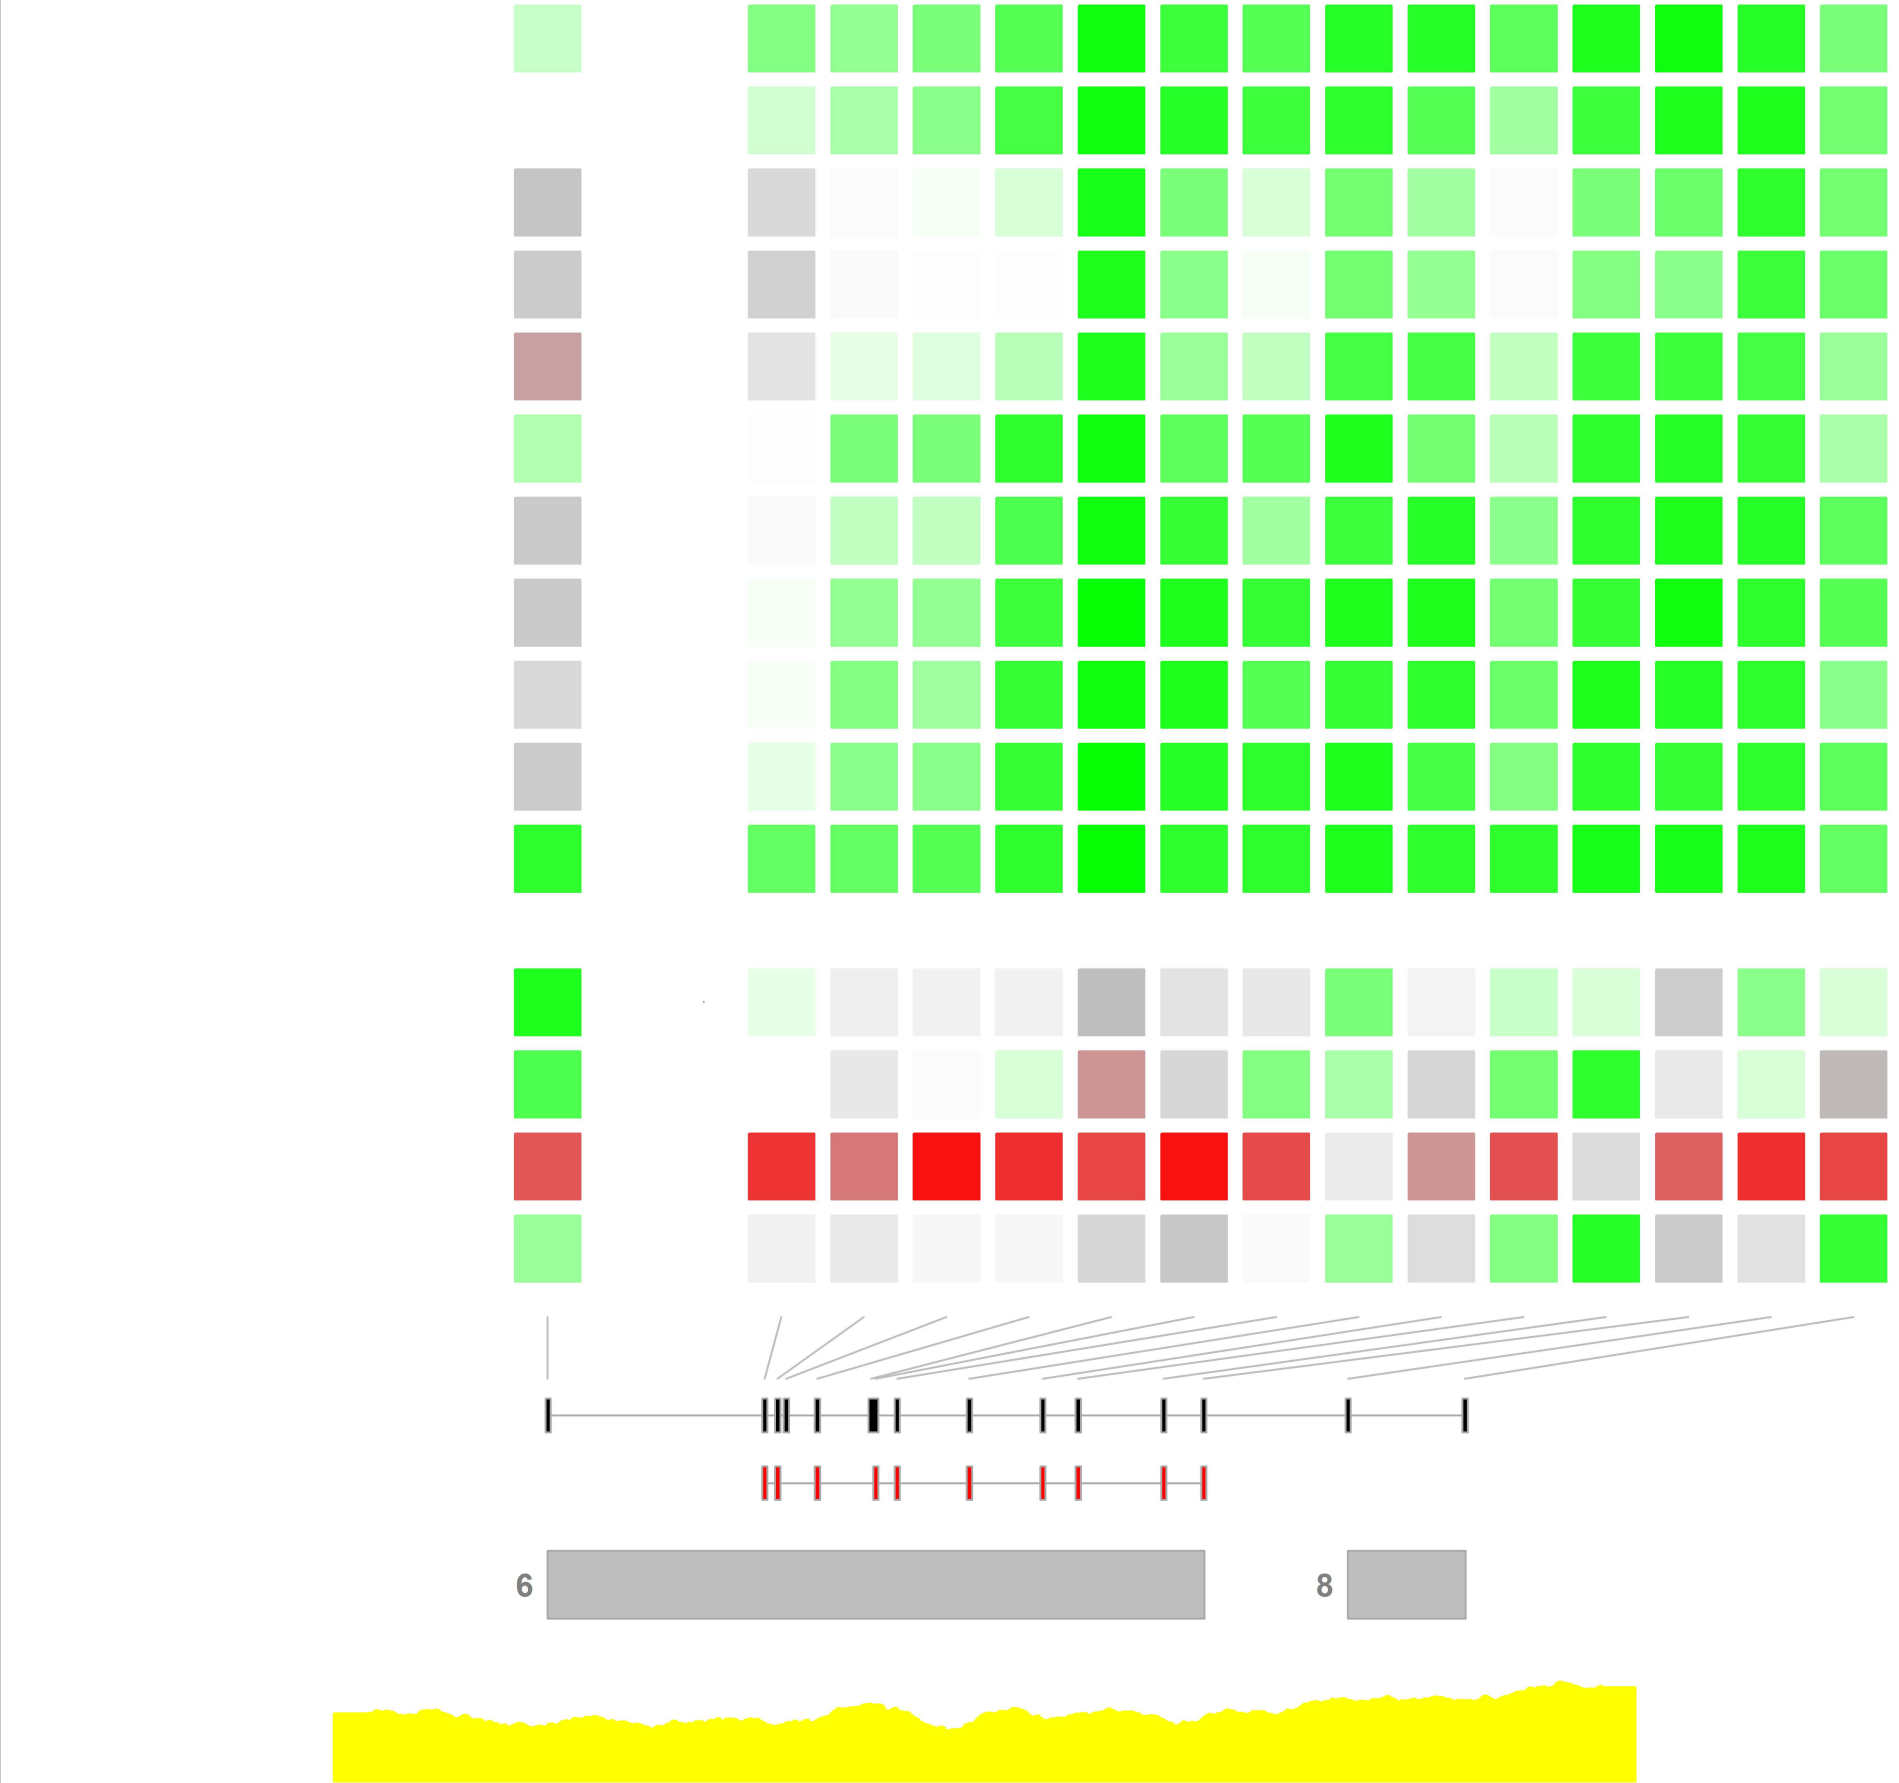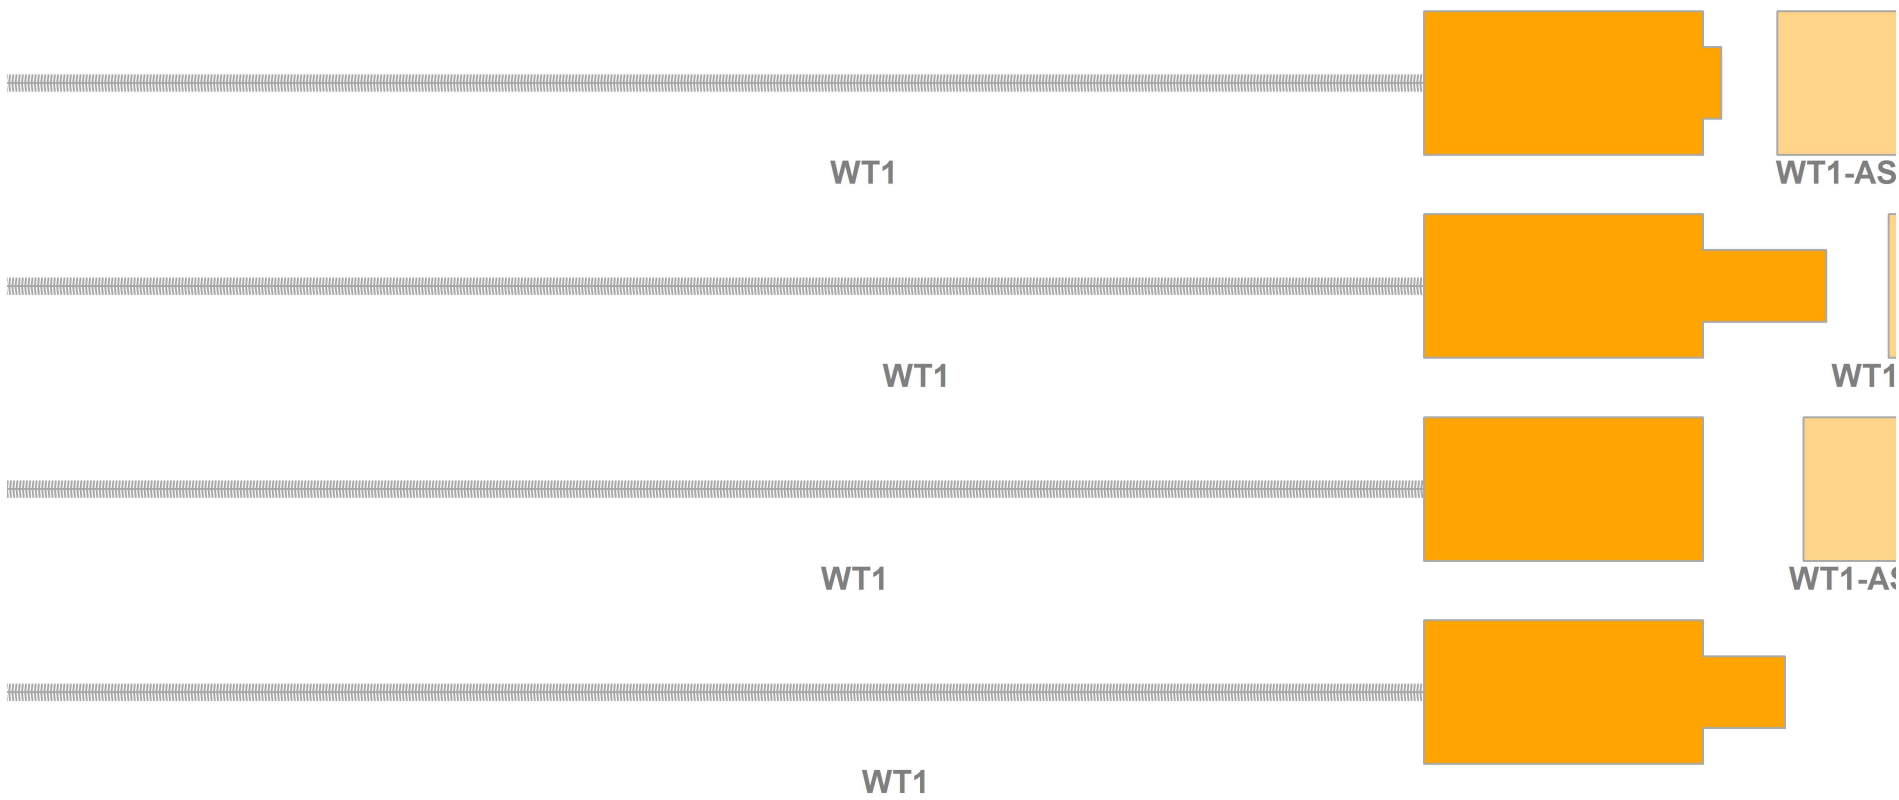





**./clusters/cluster2058\_SE\_DGvsSShypermethylated\_SE\_DG\_chr2-233250770-233254378**

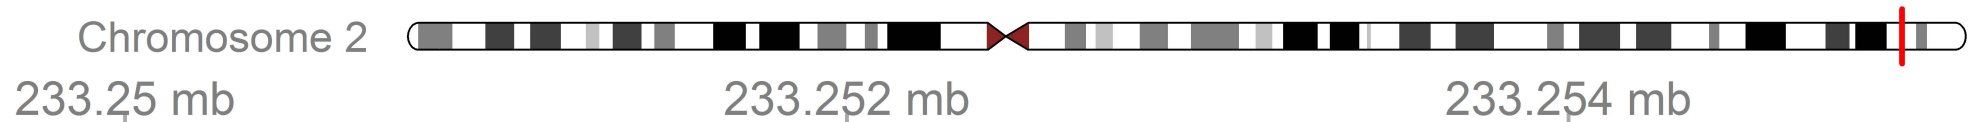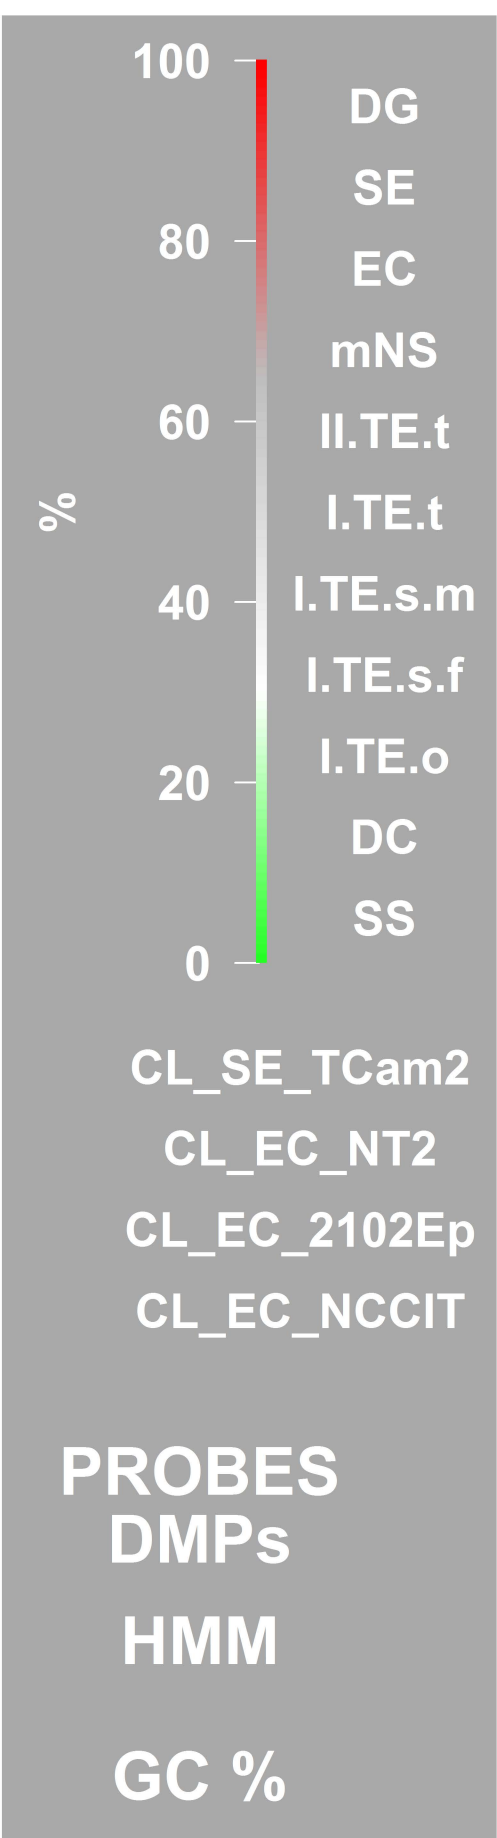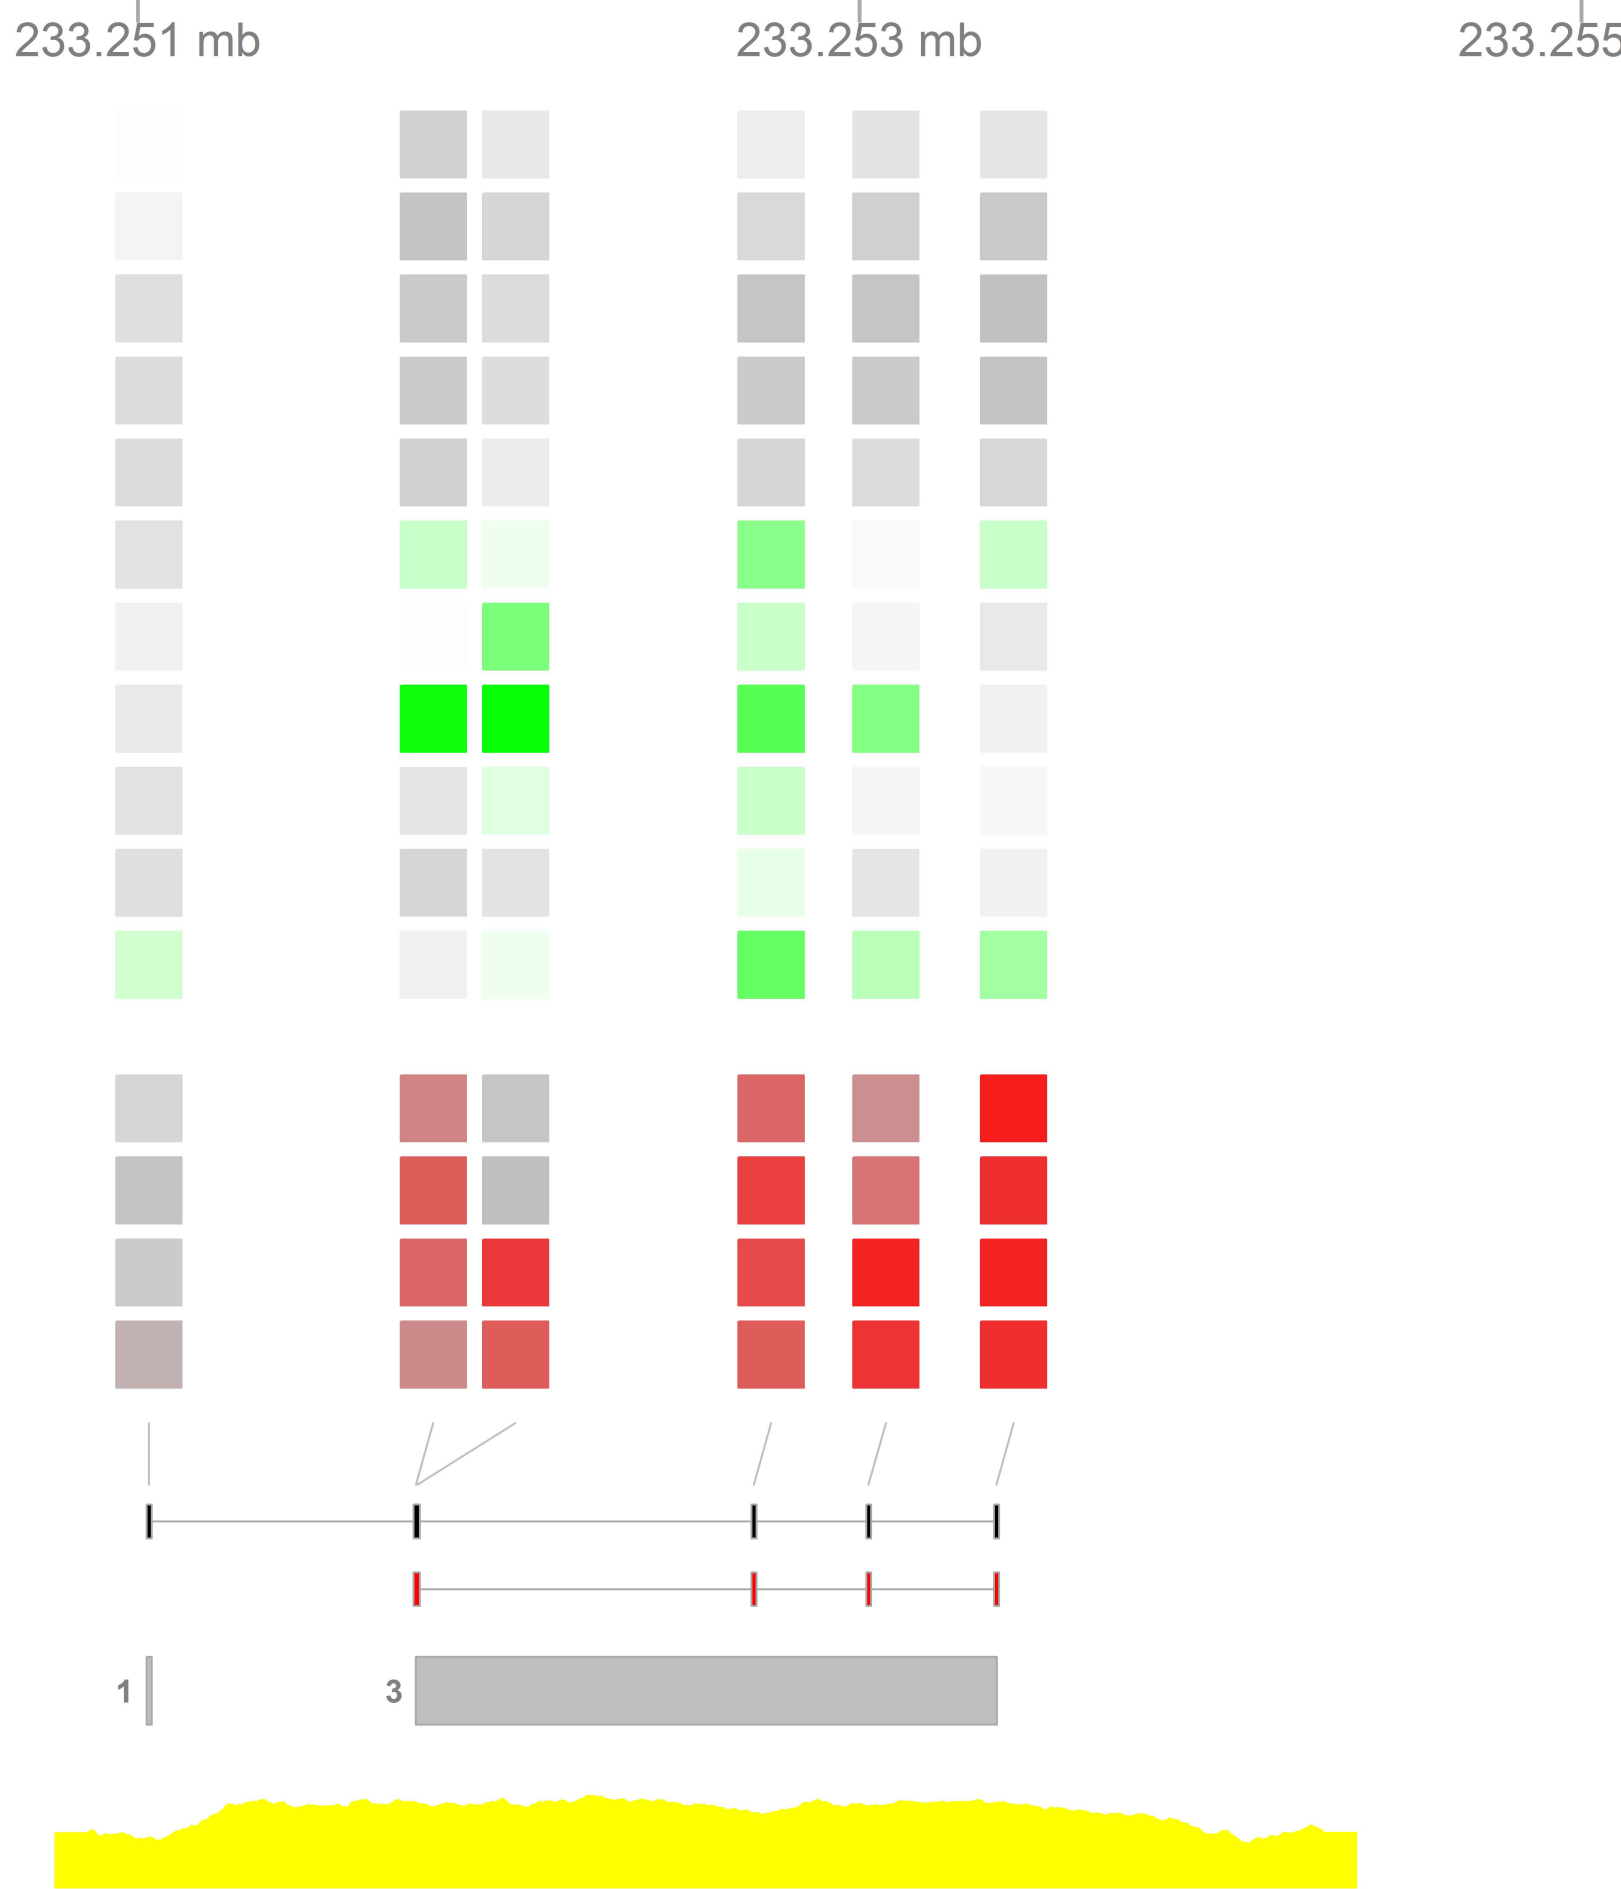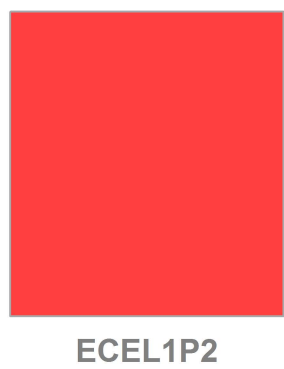





**./clusters/cluster2451\_SE\_DGvsSShypermethylated\_SE\_DG\_chr4-4862874-4865430**

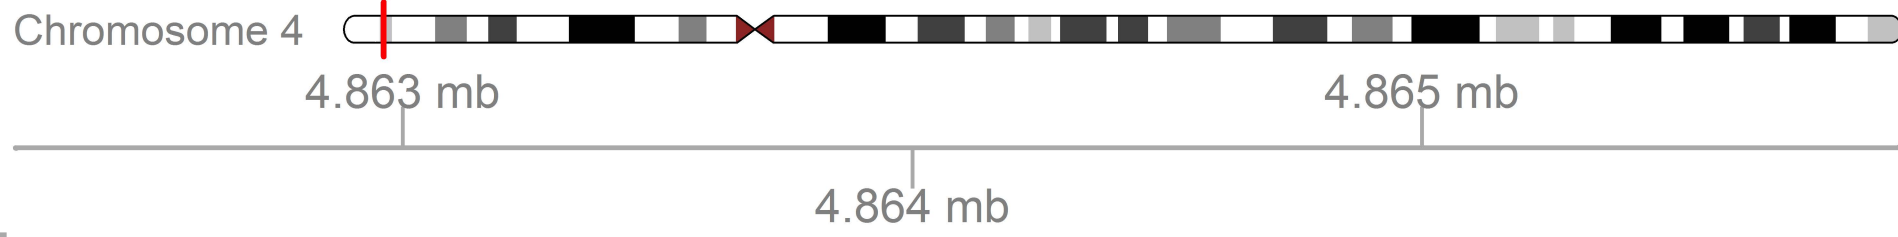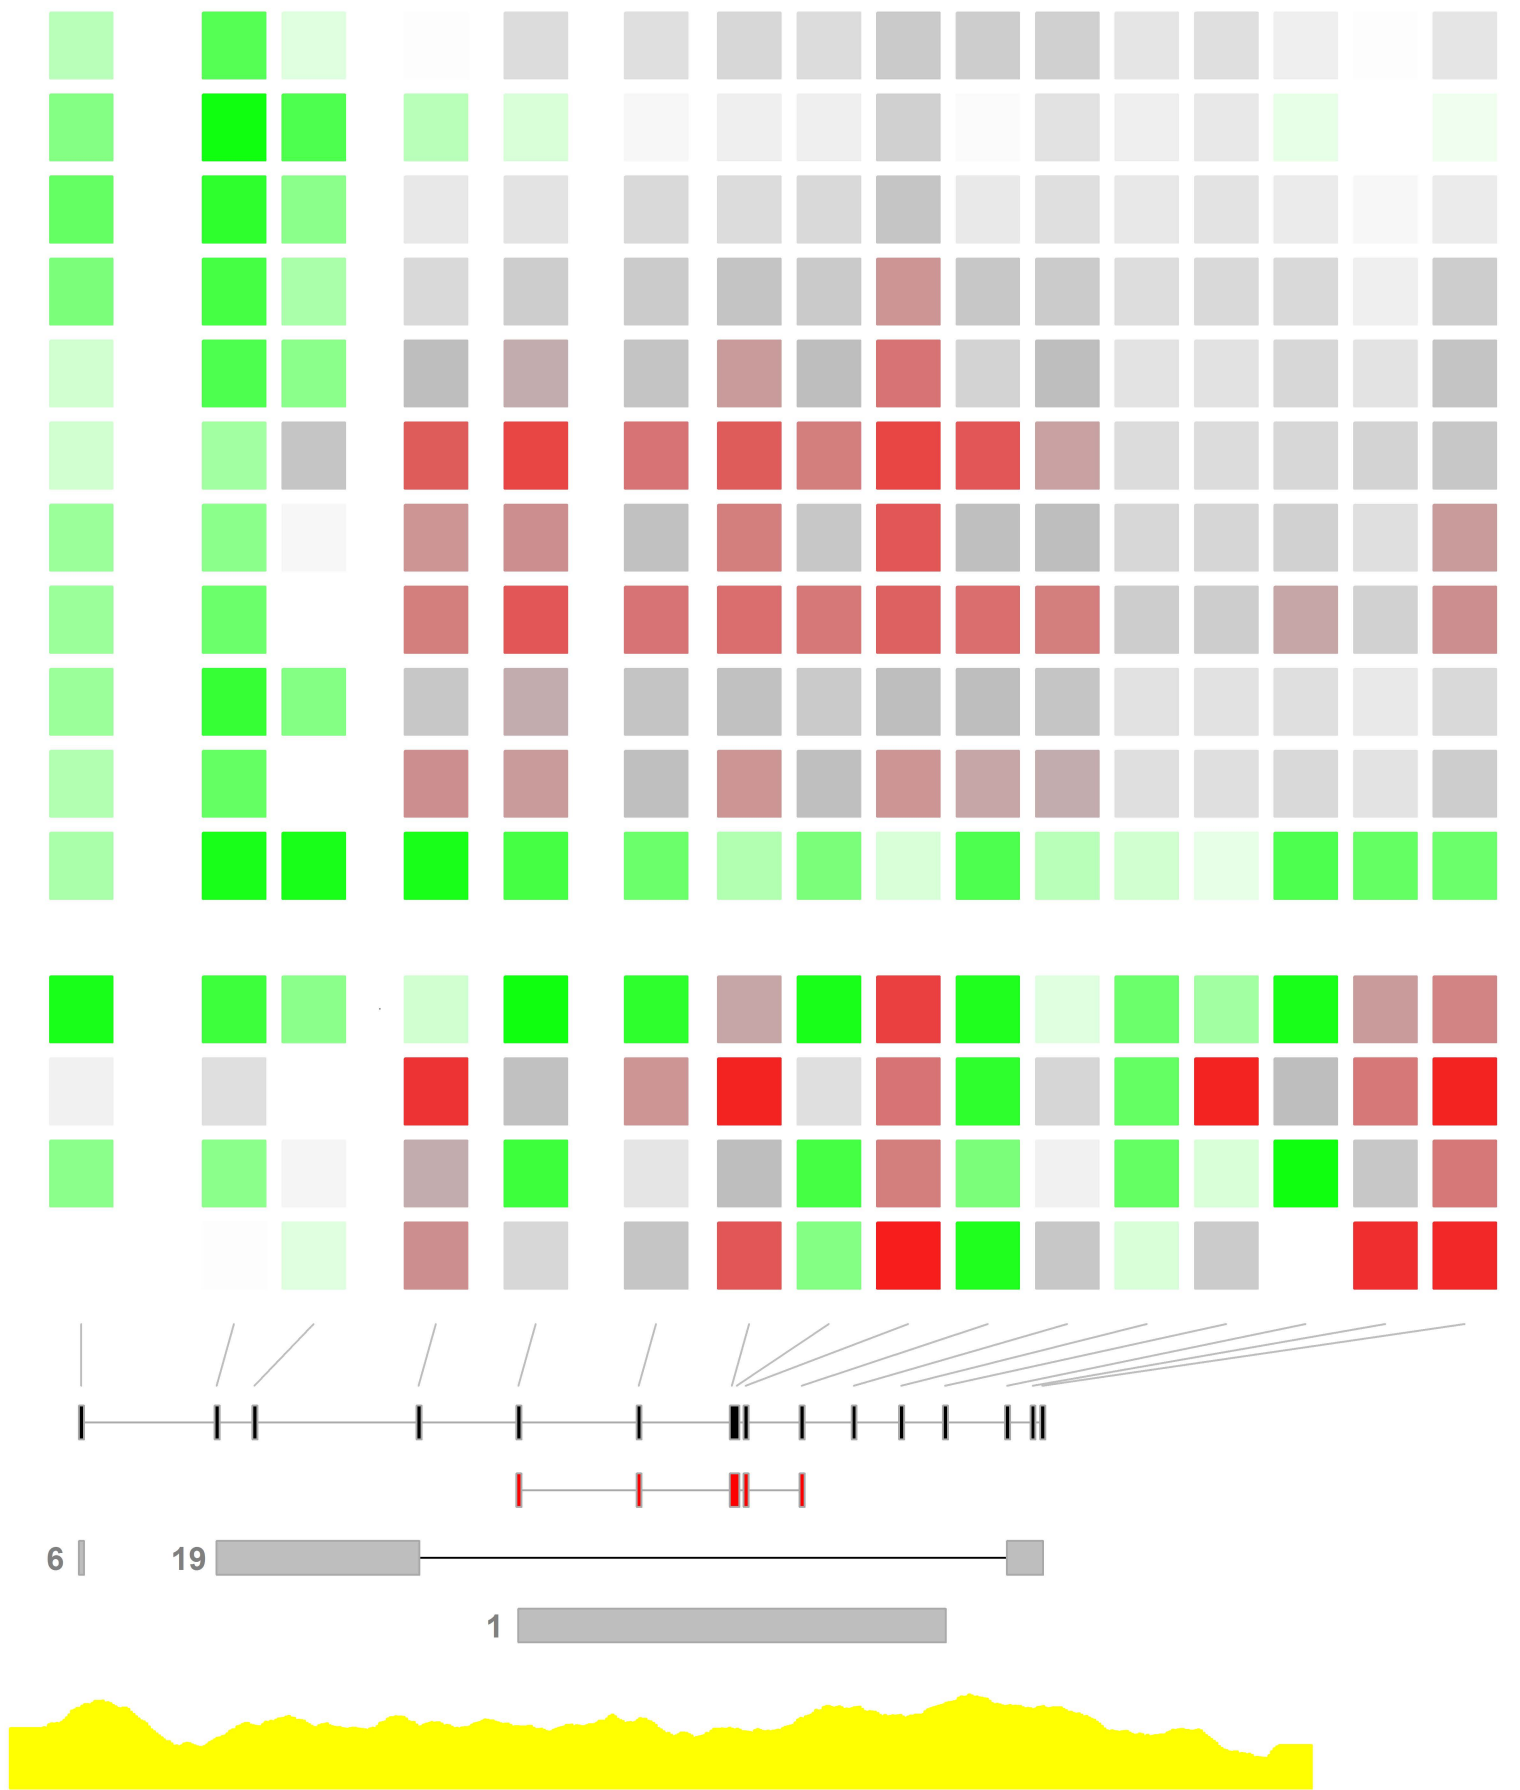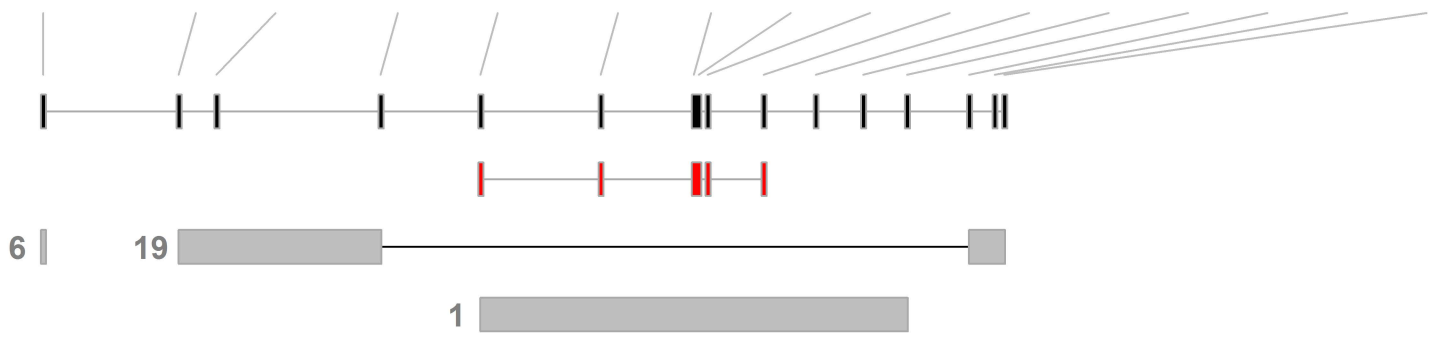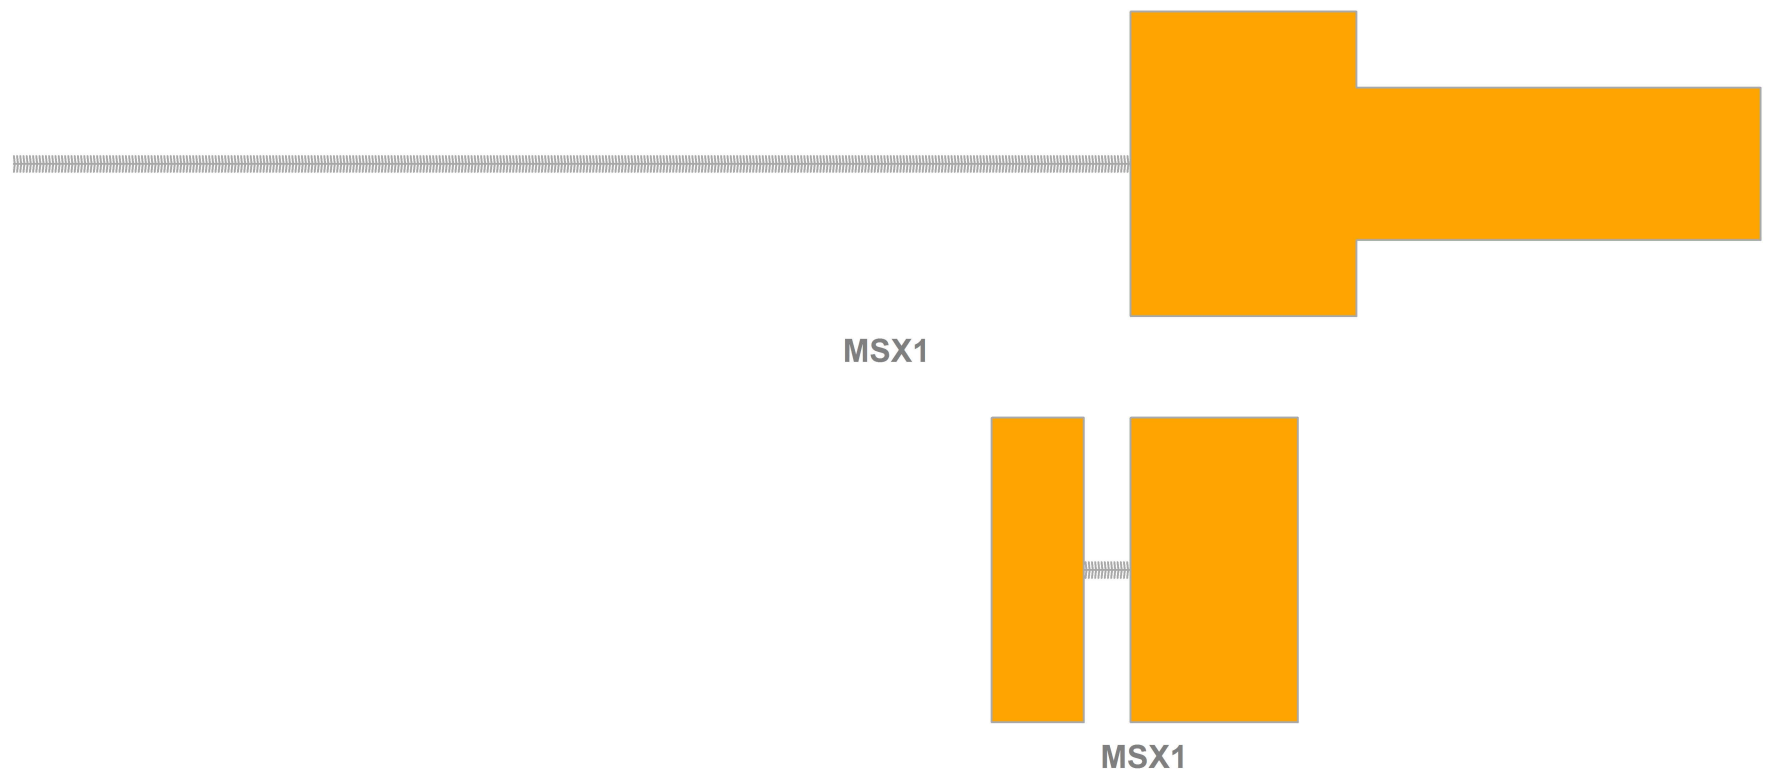



**./clusters/cluster769\_SE\_DGvsSShypermethylated\_SE\_DG\_chr12-124807992-124810934**

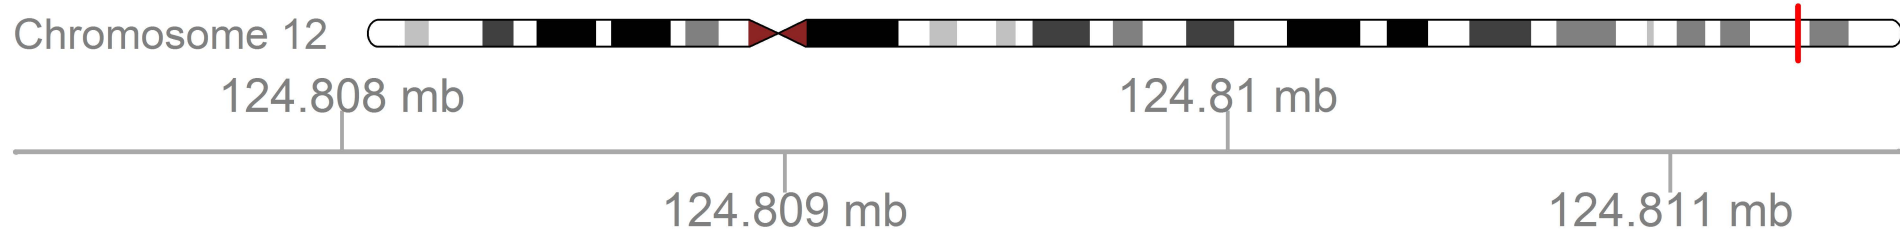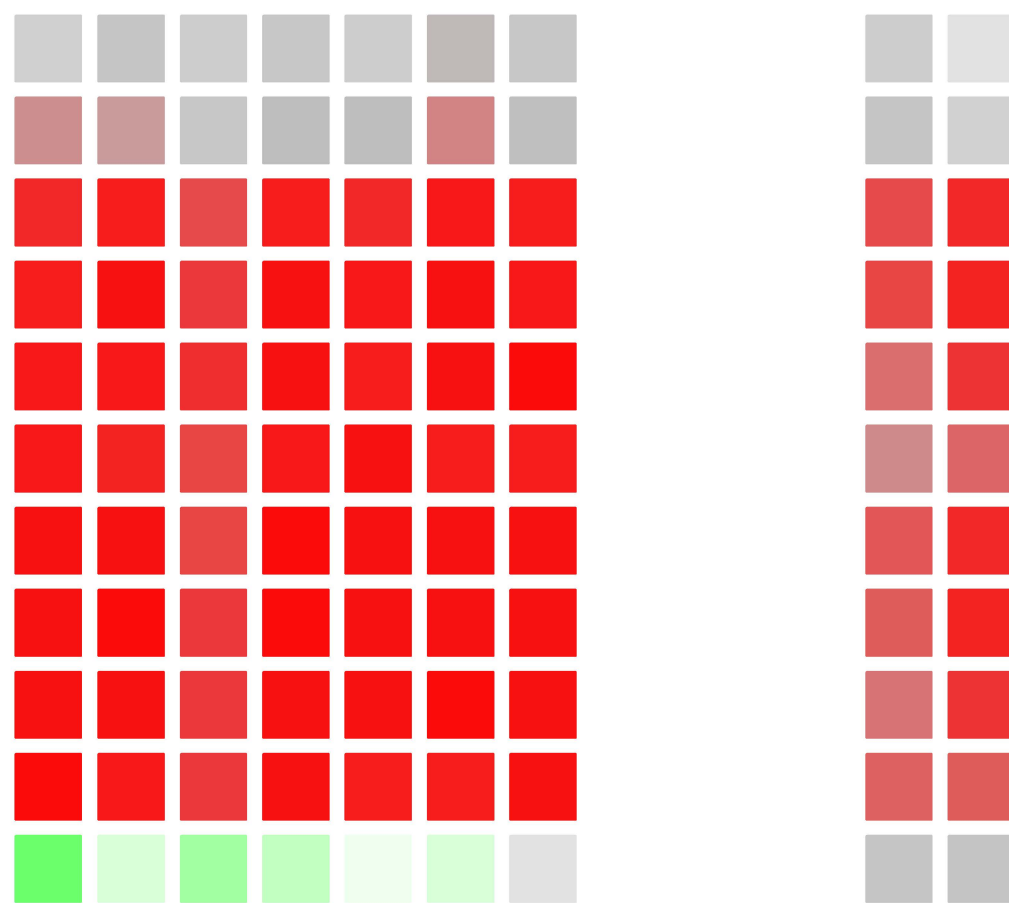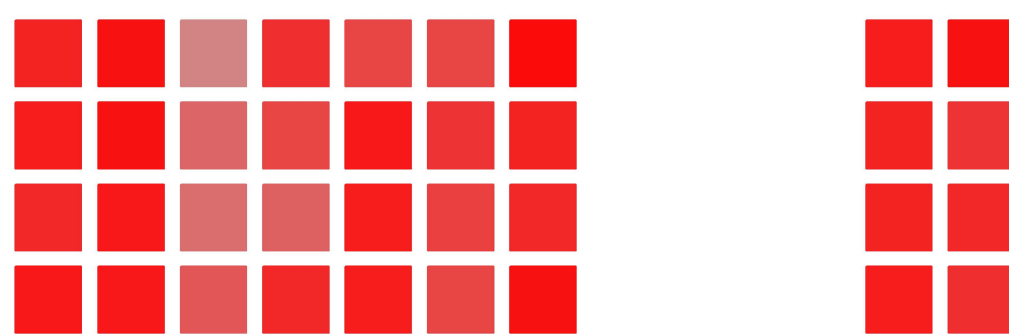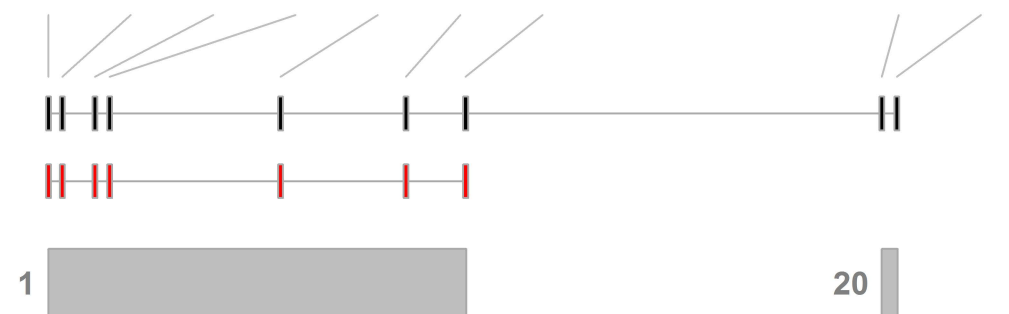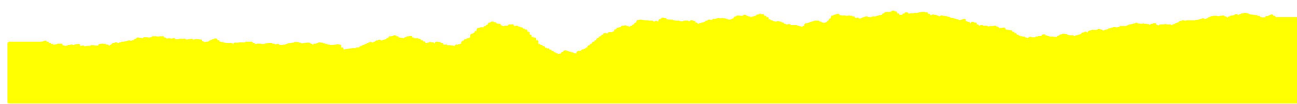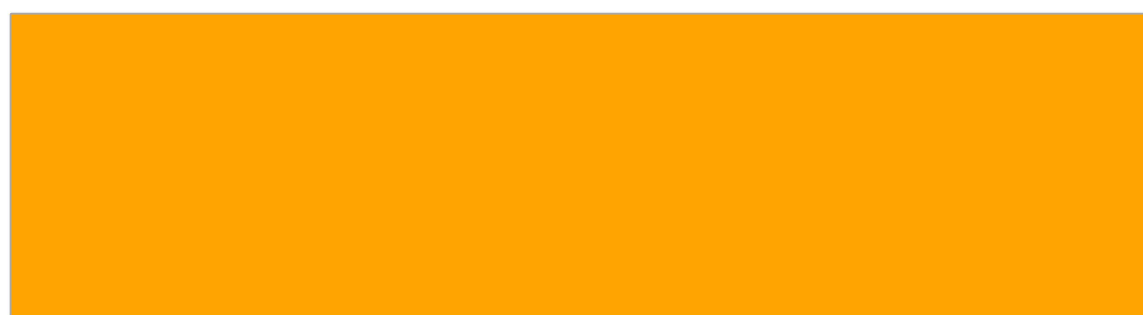

**./clusters/cluster881\_SE\_DGvsSShypermethylated\_SE\_DG\_chr13-110432636-110437780**

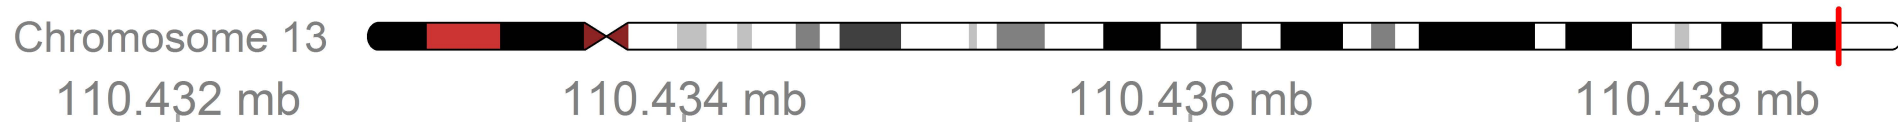

110.433 mb 110.435 mb 110.437 mb

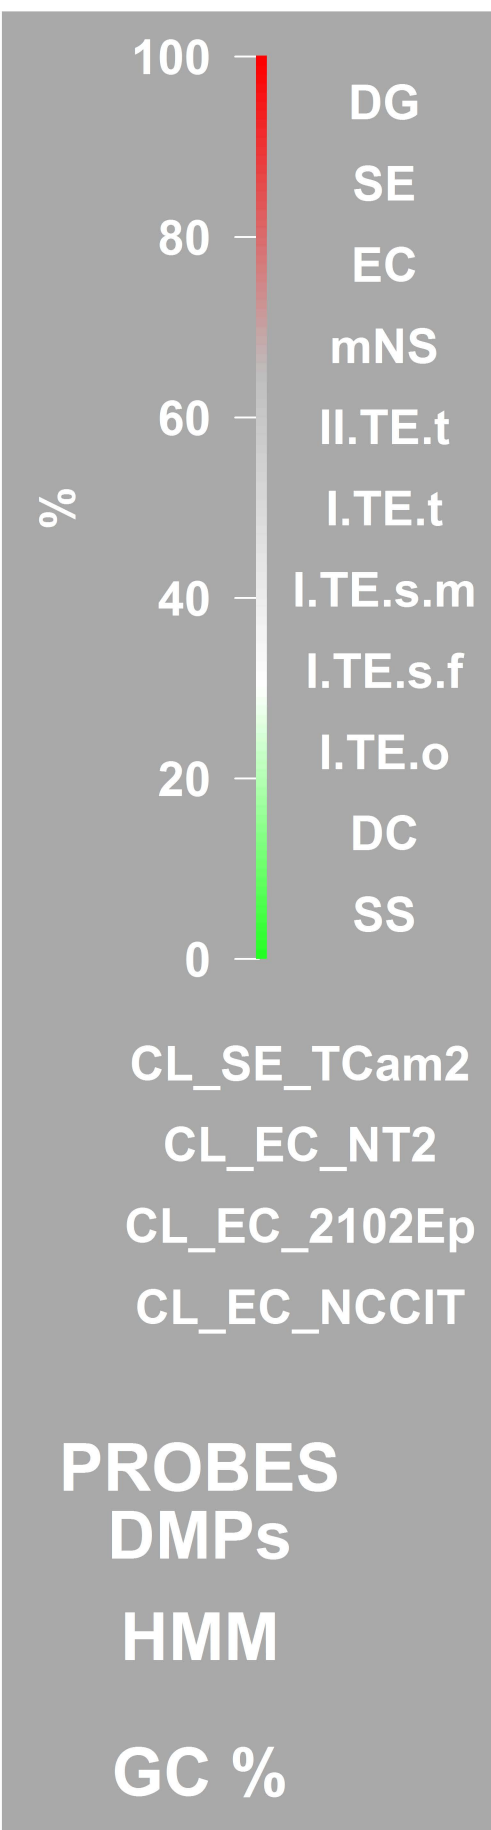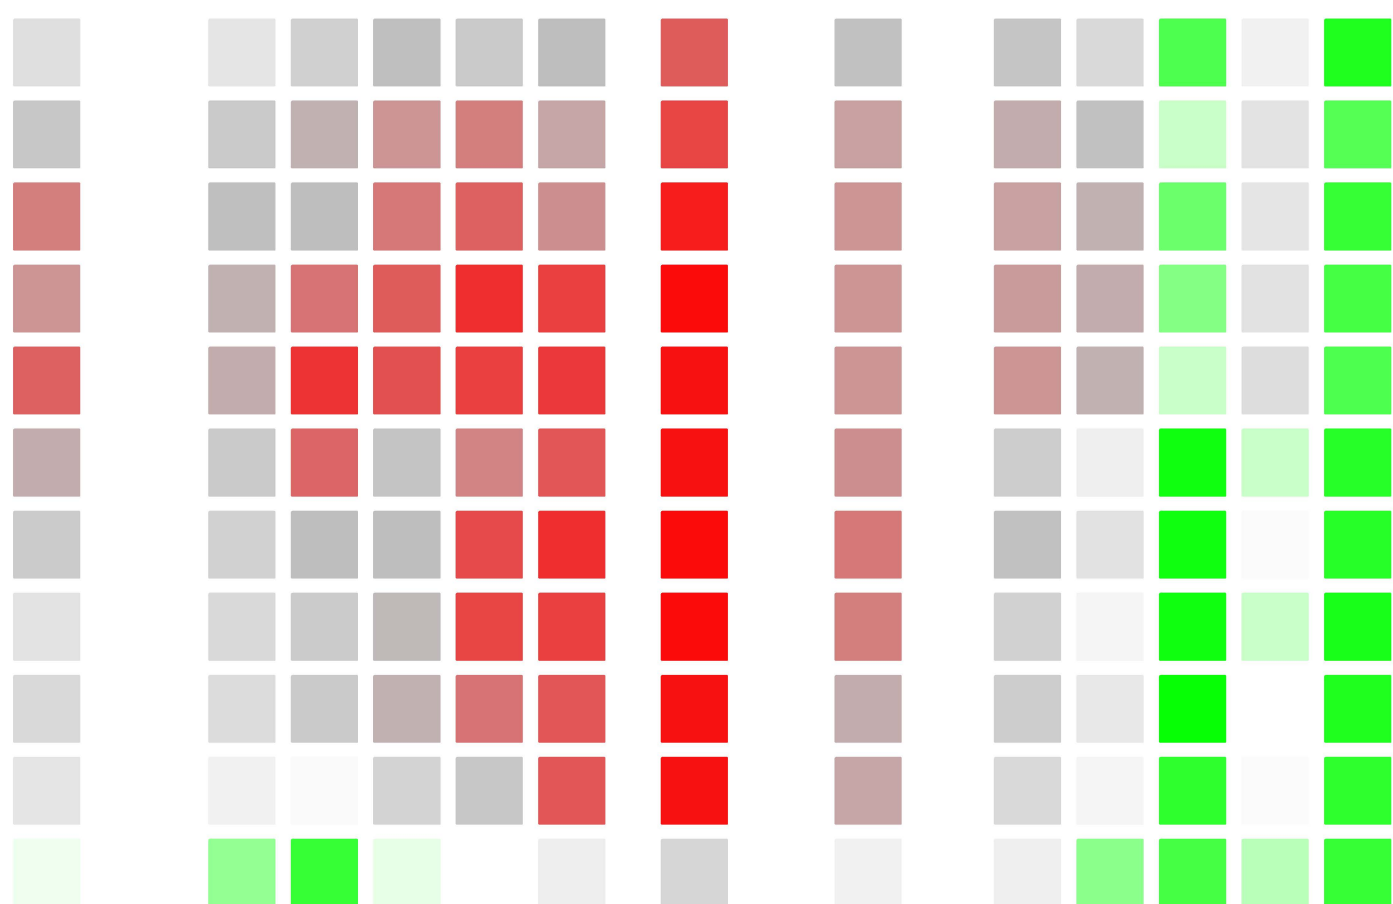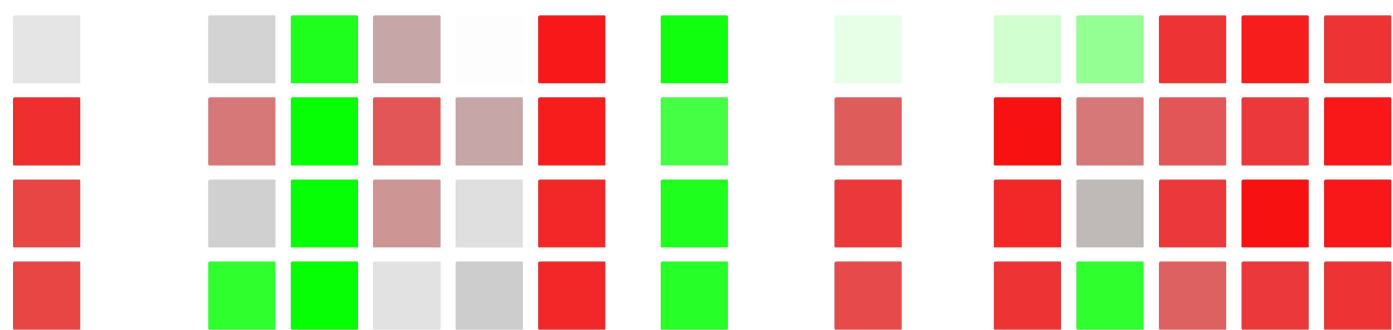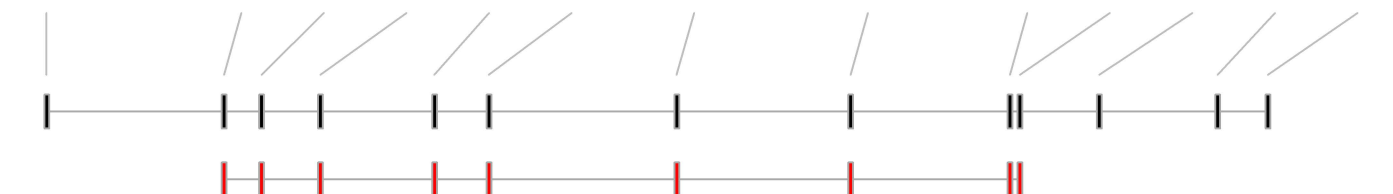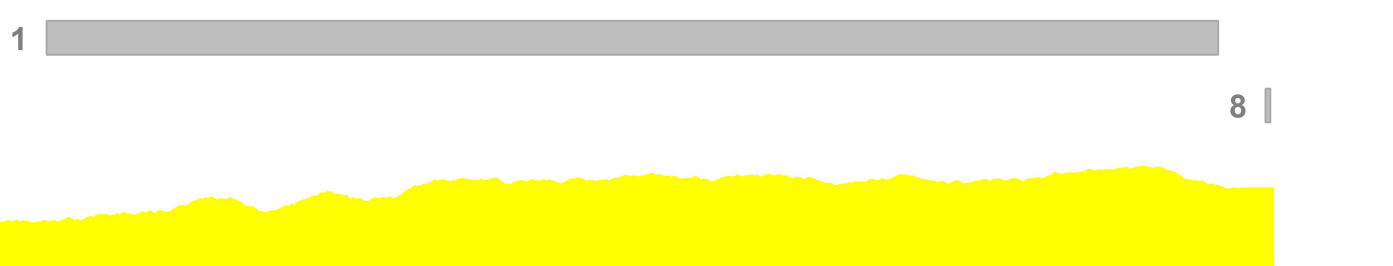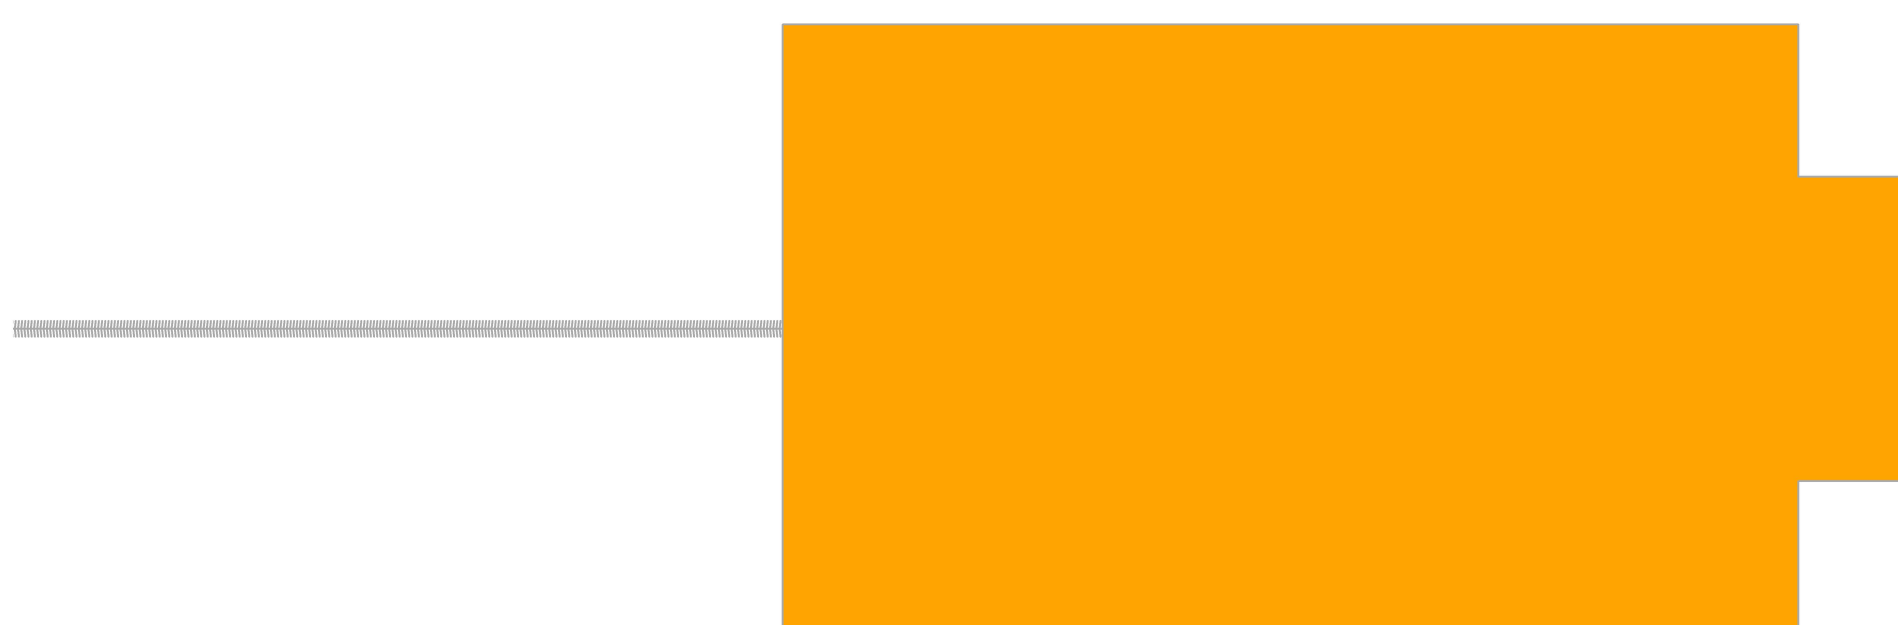

IRS2
