# Supplementary material for: Genome Wide DNA Methylation Profiles Provide Clues to the Origin and Pathogenesis of Germ Cell Tumors
Source: PubMed Central journal article supplement (PMC4479500; doi:10.1371/journal.pone.0122146), 2015-04-10
Supplement: pone.0122146.s005.pdf [file pone.0122146.s005.pdf]

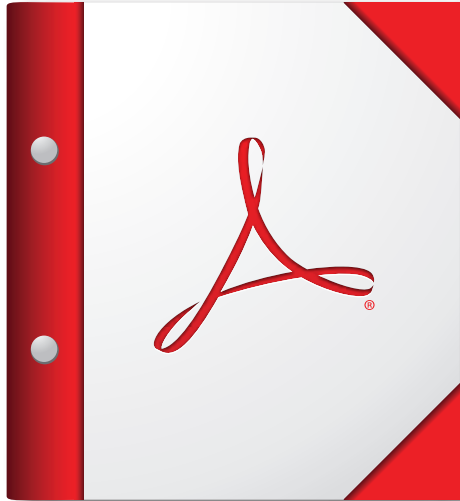

**For the best experience, open this PDF portfolio in  
Acrobat 9 or Adobe Reader 9, or later.**

[Get Adobe Reader Now!](#)
