# Supplementary material for: Genome Wide DNA Methylation Profiles Provide Clues to the Origin and Pathogenesis of Germ Cell Tumors
Source: PLoS One. 2015 Apr 10;10(4):e0122146. doi: 10.1371/journal.pone.0122146 (PMC4479500; doi:10.1371/journal.pone.0122146)
Supplement: S1 Table — (XLSX) [file pone.0122146.s007.xlsx]

## Sheet: SE_DGvsEC_mNS_HYPER-EC_mNS
cg00000108
cg00000109
cg00000321
cg00001249
cg00001269
cg00001446
cg00001534
cg00001593
cg00001791
cg00001809
cg00001930
cg00002145
cg00002190
cg00002449
cg00002464
cg00002473
cg00002591
cg00002597
cg00002809
cg00003091
cg00003181
cg00003625
cg00003858
cg00003965
cg00004055
cg00004067
cg00004072
cg00004562
cg00004608
cg00004700
cg00004773
cg00004859
cg00005166
cg00005297
cg00005817
cg00005847
cg00006459
cg00006867
cg00007064
cg00007326
cg00007426
cg00007540
cg00007644
cg00008544
cg00008564
cg00008621
cg00008695
cg00009053
cg00009349
cg00009421
cg00009436
cg00009553
cg00009750
cg00009922
cg00009927
cg00009944
cg00010078
cg00010108
cg00010672
cg00010890
cg00011239
cg00011513
cg00011564
cg00011605
cg00011740
cg00011924
cg00012317
cg00012576
cg00012698
cg00012960
cg00013015
cg00013369
cg00013409
cg00013618
cg00013804
cg00013809
cg00013899
cg00014118
cg00014194
cg00014260
cg00014301
cg00014333
cg00014377
cg00014561
cg00014638
cg00014667
cg00014786
cg00014830
cg00015343
cg00016324
cg00016439
cg00016718
cg00016892
cg00017059
cg00017546
cg00017601
cg00017639
cg00017826
cg00018128
cg00018181
cg00018229
cg00018696
cg00018828
cg00018850
cg00018866
cg00019308
cg00019366
cg00019458
cg00019511
cg00019678
cg00019826
cg00020175
cg00020348
cg00021325
cg00021540
cg00021600
cg00022054
cg00022101
cg00022145
cg00022871
cg00022900
cg00022966
cg00023001
cg00023024
cg00023132
cg00023321
cg00023415
cg00023673
cg00023702
cg00023726
cg00024192
cg00024416
cg00024443
cg00024516
cg00025347
cg00025405
cg00025823
cg00025877
cg00025972
cg00026075
cg00026104
cg00026141
cg00026362
cg00026412
cg00026458
cg00026776
cg00026857
cg00026919
cg00026938
cg00027114
cg00027120
cg00027155
cg00027454
cg00027466
cg00027669
cg00027990
cg00028014
cg00028034
cg00028135
cg00028184
cg00028507
cg00028929
cg00029246
cg00029282
cg00029583
cg00029619
cg00029678
cg00029821
cg00029922
cg00029928
cg00030466
cg00030501
cg00031235
cg00031346
cg00031779
cg00031973
cg00032366
cg00032490
cg00032609
cg00032610
cg00032664
cg00032666
cg00032756
cg00032852
cg00032879
cg00032959
cg00033165
cg00033490
cg00033834
cg00034604
cg00034755
cg00035220
cg00035347
cg00035398
cg00035889
cg00035923
cg00036110
cg00036137
cg00036258
cg00036324
cg00036369
cg00036588
cg00036664
cg00037013
cg00037856
cg00037952
cg00038020
cg00038298
cg00038584
cg00038857
cg00039057
cg00039478
cg00039801
cg00039936
cg00040027
cg00040047
cg00040103
cg00040322
cg00040530
cg00040566
cg00040749
cg00040986
cg00041328
cg00041564
cg00041599
cg00041641
cg00041865
cg00042059
cg00042263
cg00042409
cg00042478
cg00042683
cg00042882
cg00042914
cg00043043
cg00043524
cg00043591
cg00043792
cg00044372
cg00044729
cg00044995
cg00045114
cg00045690
cg00045762
cg00045910
cg00046105
cg00046156
cg00046537
cg00046991
cg00047079
cg00047147
cg00047185
cg00047338
cg00047532
cg00048370
cg00048697
cg00048705
cg00049047
cg00049323
cg00049475
cg00049868
cg00049892
cg00050250
cg00050294
cg00050496
cg00050618
cg00050872
cg00051068
cg00051307
cg00051818
cg00051952
cg00052385
cg00052665
cg00052853
cg00052964
cg00053135
cg00053361
cg00053755
cg00054173
cg00054352
cg00054409
cg00054496
cg00054692
cg00054741
cg00054774
cg00054971
cg00055073
cg00055341
cg00055434
cg00055462
cg00055603
cg00055726
cg00055764
cg00055771
cg00055811
cg00055881
cg00055986
cg00056002
cg00056497
cg00056578
cg00056754
cg00057092
cg00057208
cg00057517
cg00057603
cg00057722
cg00057900
cg00058026
cg00058413
cg00058515
cg00058857
cg00058879
cg00058938
cg00059309
cg00059374
cg00059399
cg00059652
cg00059911
cg00060605
cg00060627
cg00060641
cg00060882
cg00060956
cg00061764
cg00062285
cg00063246
cg00063369
cg00063535
cg00063699
cg00064589
cg00065385
cg00065569
cg00065726
cg00066153
cg00066184
cg00066270
cg00066449
cg00066512
cg00066722
cg00066805
cg00066817
cg00066942
cg00067032
cg00067124
cg00067196
cg00067518
cg00067528
cg00067538
cg00067588
cg00067600
cg00067606
cg00067720
cg00067742
cg00067884
cg00068153
cg00068377
cg00068433
cg00068909
cg00069014
cg00069391
cg00069815
cg00069969
cg00070042
cg00070162
cg00070181
cg00070529
cg00071012
cg00071210
cg00071265
cg00071381
cg00071408
cg00071618
cg00071727
cg00071984
cg00072426
cg00073244
cg00074348
cg00074365
cg00074415
cg00075615
cg00075975
cg00076774
cg00076797
cg00076880
cg00076936
cg00077281
cg00077297
cg00077477
cg00077566
cg00078513
cg00078911
cg00079056
cg00079375
cg00079485
cg00079551
cg00079598
cg00080060
cg00080068
cg00080148
cg00080188
cg00080252
cg00080333
cg00080418
cg00080423
cg00080682
cg00081087
cg00081105
cg00081404
cg00081439
cg00081827
cg00082178
cg00082656
cg00082729
cg00082787
cg00083188
cg00083193
cg00083194
cg00083399
cg00083535
cg00083616
cg00083790
cg00083959
cg00083993
cg00084019
cg00084131
cg00084184
cg00084604
cg00084720
cg00084798
cg00085013
cg00085256
cg00085619
cg00086171
cg00086266
cg00086346
cg00086426
cg00086429
cg00086577
cg00086710
cg00087023
cg00087073
cg00087368
cg00087482
cg00087511
cg00087799
cg00088079
cg00088148
cg00088428
cg00088464
cg00088504
cg00088885
cg00088916
cg00089154
cg00089162
cg00089314
cg00089451
cg00089528
cg00089695
cg00089864
cg00089966
cg00090091
cg00090135
cg00090282
cg00090452
cg00091146
cg00091178
cg00091302
cg00091693
cg00091827
cg00092235
cg00092443
cg00092565
cg00092682
cg00092821
cg00092967
cg00093058
cg00093087
cg00093095
cg00093099
cg00093149
cg00093177
cg00093542
cg00093686
cg00094006
cg00094487
cg00094585
cg00094817
cg00094898
cg00095333
cg00095431
cg00095526
cg00095728
cg00095846
cg00095859
cg00095930
cg00095936
cg00096307
cg00096418
cg00096440
cg00096603
cg00096742
cg00096747
cg00096845
cg00096956
cg00097038
cg00097432
cg00097518
cg00097539
cg00097550
cg00097645
cg00097968
cg00098182
cg00098286
cg00098750
cg00098819
cg00099017
cg00099094
cg00100114
cg00100538
cg00100680
cg00100703
cg00101287
cg00101350
cg00101436
cg00101555
cg00101712
cg00101713
cg00102093
cg00102439
cg00102920
cg00103398
cg00103401
cg00103448
cg00103806
cg00104072
cg00104348
cg00104562
cg00104707
cg00105640
cg00106093
cg00106196
cg00106565
cg00106767
cg00106808
cg00106923
cg00107577
cg00107603
cg00107629
cg00107630
cg00107631
cg00107667
cg00108282
cg00108351
cg00108524
cg00108694
cg00108873
cg00108894
cg00108938
cg00109069
cg00109131
cg00109164
cg00109293
cg00109776
cg00111102
cg00111629
cg00111665
cg00111948
cg00111978
cg00112260
cg00112309
cg00112314
cg00112341
cg00112558
cg00112588
cg00112798
cg00113020
cg00113225
cg00113315
cg00113321
cg00113712
cg00113951
cg00114132
cg00114159
cg00114569
cg00114694
cg00114784
cg00114963
cg00115194
cg00115297
cg00115747
cg00115954
cg00116234
cg00116305
cg00116418
cg00116463
cg00116658
cg00116686
cg00117335
cg00117914
cg00117965
cg00118103
cg00118158
cg00118199
cg00118783
cg00118966
cg00119127
cg00119314
cg00119364
cg00119387
cg00119687
cg00120147
cg00120157
cg00120286
cg00120332
cg00120416
cg00120464
cg00120810
cg00120932
cg00121366
cg00121876
cg00122362
cg00122628
cg00122659
cg00122679
cg00122765
cg00122944
cg00123072
cg00123128
cg00123317
cg00124045
cg00124902
cg00125159
cg00125601
cg00125744
cg00125893
cg00126261
cg00126498
cg00126536
cg00127070
cg00127487
cg00128171
cg00128425
cg00128482
cg00128560
cg00128718
cg00129556
cg00129827
cg00129981
cg00130393
cg00130528
cg00130707
cg00130778
cg00130817
cg00130866
cg00130947
cg00131244
cg00131261
cg00131423
cg00131758
cg00132135
cg00132716
cg00132972
cg00133595
cg00133629
cg00133811
cg00133857
cg00134190
cg00134340
cg00134563
cg00134934
cg00135293
cg00135371
cg00135399
cg00135870
cg00136400
cg00136405
cg00136477
cg00136822
cg00136852
cg00137016
cg00137385
cg00137611
cg00137745
cg00137750
cg00137840
cg00137846
cg00137918
cg00138407
cg00138451
cg00138710
cg00138766
cg00139056
cg00139242
cg00139455
cg00139683
cg00139726
cg00140189
cg00140335
cg00140361
cg00140494
cg00141548
cg00141688
cg00142239
cg00142482
cg00142815
cg00143220
cg00143308
cg00143364
cg00144039
cg00144673
cg00144832
cg00145079
cg00145150
cg00145438
cg00145672
cg00145683
cg00145866
cg00145961
cg00146027
cg00146437
cg00146565
cg00146612
cg00147244
cg00147863
cg00147943
cg00148325
cg00148501
cg00148513
cg00148926
cg00149061
cg00149455
cg00149679
cg00149734
cg00150012
cg00150025
cg00150080
cg00150128
cg00150774
cg00150785
cg00151048
cg00151491
cg00151565
cg00151676
cg00151919
cg00151922
cg00152041
cg00152047
cg00152117
cg00152126
cg00152340
cg00152646
cg00152878
cg00152948
cg00153306
cg00153448
cg00153543
cg00153707
cg00154119
cg00154557
cg00154727
cg00154920
cg00154957
cg00155063
cg00155345
cg00155526
cg00155535
cg00155679
cg00155846
cg00156057
cg00156336
cg00156506
cg00156569
cg00156684
cg00156802
cg00156948
cg00156995
cg00157228
cg00157359
cg00157439
cg00157656
cg00157962
cg00158081
cg00158308
cg00158434
cg00158539
cg00158770
cg00158789
cg00159159
cg00159379
cg00159614
cg00159682
cg00159764
cg00159873
cg00159987
cg00160027
cg00160066
cg00160301
cg00160302
cg00160478
cg00160872
cg00160886
cg00160976
cg00161124
cg00161345
cg00161770
cg00161878
cg00162859
cg00163089
cg00163217
cg00163668
cg00163674
cg00163702
cg00163727
cg00163861
cg00164121
cg00164301
cg00164546
cg00164641
cg00164678
cg00164906
cg00164941
cg00164949
cg00165067
cg00165078
cg00165121
cg00165360
cg00165862
cg00165994
cg00166352
cg00166653
cg00166770
cg00166915
cg00167076
cg00167158
cg00167248
cg00167259
cg00167670
cg00167783
cg00167836
cg00167916
cg00168032
cg00168193
cg00168417
cg00168439
cg00168693
cg00168694
cg00168942
cg00168967
cg00169019
cg00169419
cg00170037
cg00170188
cg00170242
cg00170295
cg00170796
cg00170799
cg00170931
cg00171154
cg00171281
cg00171783
cg00172085
cg00172189
cg00172631
cg00172872
cg00173776
cg00173804
cg00173906
cg00174093
cg00174179
cg00174508
cg00174654
cg00174713
cg00174967
cg00175150
cg00175487
cg00175641
cg00175734
cg00175823
cg00175987
cg00176309
cg00176496
cg00176657
cg00176672
cg00176740
cg00176876
cg00176949
cg00177211
cg00177237
cg00177243
cg00177431
cg00177456
cg00177698
cg00178030
cg00178249
cg00178506
cg00178648
cg00178661
cg00179070
cg00179217
cg00179576
cg00179598
cg00180559
cg00181061
cg00181669
cg00181849
cg00181889
cg00182202
cg00182416
cg00182639
cg00182758
cg00182877
cg00183100
cg00183239
cg00183647
cg00184512
cg00184893
cg00185103
cg00185189
cg00185413
cg00185660
cg00185829
cg00185867
cg00185988
cg00186143
cg00186207
cg00186374
cg00186580
cg00186815
cg00187129
cg00187299
cg00187437
cg00188032
cg00189389
cg00189533
cg00190162
cg00190206
cg00190835
cg00191178
cg00191858
cg00192046
cg00192275
cg00192468
cg00193490
cg00193859
cg00194044
cg00194374
cg00194585
cg00194771
cg00195144
cg00196151
cg00196372
cg00196407
cg00196474
cg00196715
cg00197006
cg00197191
cg00197266
cg00197322
cg00197373
cg00197728
cg00197993
cg00198141
cg00198586
cg00198759
cg00198994
cg00199000
cg00199065
cg00199091
cg00199399
cg00199428
cg00199753
cg00200645
cg00200658
cg00200667
cg00200734
cg00201192
cg00201257
cg00201275
cg00201760
cg00201819
cg00202568
cg00203037
cg00203564
cg00203594
cg00203736
cg00203915
cg00204262
cg00204512
cg00204748
cg00204782
cg00205605
cg00205703
cg00205756
cg00205786
cg00205813
cg00206233
cg00206332
cg00206542
cg00206553
cg00206779
cg00206853
cg00207428
cg00207890
cg00207939
cg00208218
cg00208504
cg00209623
cg00209786
cg00209923
cg00210856
cg00210994
cg00211086
cg00211489
cg00211661
cg00211961
cg00212119
cg00212470
cg00212520
cg00212786
cg00213044
cg00213177
cg00213189
cg00213295
cg00213331
cg00213745
cg00214012
cg00214171
cg00214395
cg00214504
cg00214856
cg00215017
cg00215019
cg00215066
cg00215182
cg00215521
cg00215587
cg00215611
cg00215896
cg00216913
cg00217055
cg00217225
cg00218103
cg00218215
cg00218404
cg00218409
cg00218484
cg00218792
cg00218945
cg00220102
cg00220661
cg00220736
cg00220952
cg00220965
cg00221096
cg00221658
cg00221747
cg00221788
cg00222053
cg00222175
cg00222341
cg00222684
cg00222799
cg00223135
cg00223681
cg00223715
cg00223863
cg00223899
cg00224086
cg00224312
cg00224417
cg00224465
cg00224471
cg00224480
cg00224508
cg00224523
cg00224671
cg00224929
cg00225858
cg00226580
cg00226822
cg00226849
cg00227110
cg00227156
cg00227222
cg00227355
cg00228118
cg00228240
cg00228281
cg00228476
cg00228708
cg00228738
cg00230074
cg00230183
cg00230450
cg00230509
cg00230837
cg00230924
cg00231085
cg00231239
cg00231274
cg00231299
cg00231389
cg00231483
cg00231504
cg00231528
cg00231754
cg00231927
cg00232445
cg00232453
cg00232535
cg00232679
cg00232806
cg00232816
cg00232831
cg00232903
cg00233948
cg00234017
cg00234027
cg00234046
cg00234095
cg00234321
cg00234613
cg00234655
cg00234961
cg00234998
cg00235336
cg00235442
cg00235484
cg00235657
cg00235786
cg00235887
cg00236005
cg00236150
cg00236305
cg00236576
cg00236729
cg00237010
cg00237489
cg00237606
cg00238182
cg00238283
cg00238353
cg00238391
cg00238468
cg00238543
cg00238662
cg00238897
cg00238910
cg00239071
cg00239272
cg00239490
cg00239529
cg00239657
cg00239660
cg00239899
cg00239915
cg00239988
cg00240205
cg00240378
cg00240719
cg00240860
cg00240875
cg00241274
cg00241427
cg00241663
cg00242020
cg00242098
cg00242233
cg00242285
cg00242325
cg00242786
cg00242950
cg00243040
cg00243574
cg00243661
cg00243747
cg00244034
cg00244111
cg00244299
cg00244308
cg00244317
cg00244747
cg00244854
cg00245057
cg00245192
cg00245454
cg00245502
cg00245613
cg00245635
cg00245778
cg00245896
cg00246402
cg00246840
cg00247334
cg00247361
cg00247426
cg00247489
cg00247631
cg00248242
cg00248439
cg00248488
cg00248713
cg00248828
cg00249503
cg00249511
cg00249584
cg00249614
cg00250391
cg00250483
cg00250645
cg00250711
cg00250743
cg00250761
cg00251405
cg00251678
cg00251716
cg00251767
cg00251824
cg00252057
cg00252418
cg00252529
cg00252533
cg00252804
cg00252813
cg00252814
cg00253065
cg00253171
cg00253185
cg00253346
cg00253379
cg00253681
cg00253735
cg00254258
cg00254338
cg00254378
cg00254426
cg00254470
cg00254714
cg00254771
cg00255135
cg00255631
cg00256166
cg00256201
cg00256226
cg00256512
cg00256593
cg00256675
cg00256816
cg00256873
cg00256928
cg00257296
cg00257473
cg00257659
cg00257704
cg00257769
cg00258081
cg00258203
cg00259518
cg00259584
cg00259834
cg00260235
cg00261082
cg00261325
cg00261621
cg00261832
cg00262054
cg00262159
cg00262415
cg00262489
cg00262621
cg00263368
cg00263619
cg00263677
cg00263700
cg00263759
cg00264419
cg00264578
cg00264994
cg00265769
cg00265783
cg00266389
cg00266566
cg00266604
cg00267078
cg00267122
cg00267142
cg00267156
cg00267286
cg00267352
cg00267694
cg00267883
cg00268547
cg00268644
cg00268793
cg00269140
cg00269245
cg00269606
cg00269615
cg00269643
cg00270141
cg00270259
cg00270520
cg00270974
cg00271096
cg00271177
cg00271210
cg00271925
cg00272286
cg00272484
cg00272903
cg00272992
cg00273037
cg00273267
cg00273657
cg00273754
cg00273863
cg00274357
cg00274909
cg00275181
cg00275362
cg00275449
cg00275479
cg00275626
cg00276389
cg00276443
cg00276455
cg00276799
cg00277685
cg00277714
cg00277797
cg00277804
cg00277898
cg00277927
cg00278517
cg00279700
cg00280235
cg00280239
cg00280504
cg00280799
cg00280812
cg00280858
cg00280895
cg00281100
cg00281725
cg00282267
cg00282877
cg00283046
cg00283187
cg00283283
cg00283524
cg00283887
cg00284146
cg00284179
cg00284420
cg00284438
cg00284511
cg00285317
cg00285343
cg00286014
cg00286067
cg00286513
cg00286853
cg00286909
cg00287012
cg00287413
cg00287589
cg00287713
cg00287717
cg00287841
cg00288463
cg00288736
cg00288957
cg00289258
cg00289362
cg00289558
cg00290101
cg00290303
cg00290355
cg00290483
cg00290627
cg00290868
cg00291164
cg00291213
cg00291292
cg00291329
cg00292073
cg00292305
cg00292636
cg00292896
cg00293191
cg00293599
cg00294065
cg00294149
cg00294538
cg00294550
cg00294684
cg00294940
cg00295259
cg00295293
cg00295744
cg00296018
cg00296121
cg00296348
cg00296578
cg00296894
cg00297282
cg00297334
cg00297362
cg00297584
cg00297741
cg00297843
cg00297993
cg00298242
cg00298399
cg00298919
cg00298951
cg00298977
cg00299105
cg00299257
cg00299396
cg00299558
cg00299737
cg00299767
cg00300216
cg00300627
cg00300637
cg00300794
cg00300822
cg00301033
cg00301660
cg00301762
cg00301792
cg00302081
cg00302270
cg00302340
cg00302763
cg00302979
cg00303026
cg00303111
cg00303262
cg00303429
cg00303606
cg00303641
cg00303811
cg00303919
cg00304076
cg00304185
cg00304388
cg00305740
cg00305947
cg00305993
cg00306063
cg00306284
cg00306378
cg00306523
cg00306728
cg00306951
cg00307066
cg00307073
cg00307150
cg00307497
cg00307530
cg00308021
cg00308065
cg00308133
cg00308361
cg00308440
cg00308594
cg00308618
cg00308659
cg00308665
cg00308792
cg00308841
cg00309133
cg00309232
cg00309965
cg00310145
cg00310404
cg00310523
cg00310588
cg00310792
cg00310855
cg00311131
cg00311360
cg00311772
cg00312474
cg00312508
cg00313297
cg00313498
cg00313685
cg00313750
cg00314343
cg00314368
cg00314627
cg00314741
cg00314827
cg00314892
cg00314943
cg00315239
cg00315395
cg00315487
cg00315837
cg00316015
cg00316151
cg00316508
cg00316803
cg00316939
cg00317626
cg00317754
cg00318000
cg00318013
cg00318243
cg00318380
cg00318543
cg00318573
cg00318643
cg00318682
cg00318877
cg00318899
cg00319661
cg00319692
cg00320094
cg00320138
cg00320453
cg00320539
cg00320597
cg00320790
cg00321234
cg00321286
cg00321478
cg00321555
cg00321638
cg00321775
cg00321824
cg00321901
cg00322121
cg00322212
cg00322262
cg00322509
cg00322618
cg00322919
cg00323014
cg00323313
cg00323522
cg00323916
cg00323962
cg00324097
cg00324108
cg00324128
cg00324161
cg00324205
cg00324223
cg00324366
cg00324719
cg00324748
cg00324827
cg00324979
cg00325113
cg00325381
cg00325491
cg00325531
cg00325910
cg00325917
cg00326231
cg00326836
cg00327383
cg00327437
cg00327544
cg00327669
cg00327947
cg00328284
cg00328597
cg00328711
cg00328740
cg00328813
cg00328916
cg00328935
cg00328965
cg00329157
cg00329180
cg00329472
cg00329728
cg00330059
cg00330455
cg00330929
cg00330958
cg00331027
cg00331101
cg00331135
cg00331257
cg00331283
cg00332048
cg00332067
cg00332146
cg00332248
cg00332305
cg00332307
cg00332421
cg00332689
cg00332850
cg00332882
cg00332951
cg00332961
cg00333512
cg00333528
cg00333583
cg00333678
cg00333848
cg00334453
cg00334498
cg00334691
cg00334794
cg00334821
cg00334863
cg00335361
cg00336149
cg00336376
cg00336475
cg00336700
cg00336791
cg00336867
cg00336946
cg00337070
cg00337558
cg00337658
cg00338377
cg00338391
cg00338479
cg00338519
cg00339012
cg00339241
cg00339319
cg00339356
cg00339441
cg00339695
cg00339769
cg00340127
cg00340251
cg00340326
cg00340919
cg00341732
cg00341843
cg00341885
cg00341935
cg00341950
cg00342415
cg00342590
cg00343092
cg00343305
cg00343747
cg00344308
cg00344644
cg00344888
cg00344920
cg00345270
cg00345344
cg00345366
cg00345704
cg00345744
cg00346074
cg00346300
cg00346326
cg00346716
cg00346898
cg00346951
cg00347071
cg00347198
cg00347643
cg00347673
cg00347757
cg00347863
cg00348113
cg00348244
cg00348802
cg00348858
cg00348891
cg00349071
cg00349948
cg00350199
cg00350405
cg00350448
cg00350478
cg00350615
cg00350835
cg00350914
cg00350920
cg00351119
cg00351202
cg00351443
cg00351635
cg00351750
cg00351804
cg00352031
cg00352043
cg00352417
cg00352576
cg00352913
cg00353643
cg00353659
cg00353844
cg00354549
cg00354641
cg00354775
cg00355019
cg00355188
cg00355286
cg00355325
cg00355690
cg00355799
cg00355804
cg00356045
cg00356183
cg00356251
cg00356500
cg00356815
cg00356875
cg00356916
cg00356999
cg00358459
cg00358936
cg00359590
cg00359661
cg00360077
cg00360840
cg00361155
cg00361380
cg00361609
cg00361695
cg00361898
cg00362401
cg00362680
cg00363114
cg00363737
cg00363830
cg00364001
cg00364016
cg00364026
cg00364304
cg00364325
cg00364339
cg00364747
cg00365004
cg00365481
cg00365670
cg00366103
cg00366252
cg00366359
cg00366880
cg00367135
cg00367281
cg00367424
cg00367488
cg00367532
cg00367596
cg00367962
cg00368577
cg00368924
cg00369056
cg00369058
cg00369181
cg00369351
cg00369414
cg00370123
cg00370589
cg00370968
cg00371195
cg00371301
cg00371568
cg00371829
cg00372132
cg00372692
cg00372774
cg00372886
cg00372908
cg00373020
cg00373245
cg00373247
cg00373256
cg00373436
cg00373763
cg00374056
cg00374101
cg00374346
cg00374492
cg00374747
cg00375025
cg00375132
cg00375691
cg00375983
cg00376316
cg00376334
cg00376448
cg00376464
cg00376553
cg00376979
cg00377070
cg00377301
cg00377591
cg00377865
cg00377953
cg00378292
cg00378492
cg00378658
cg00378999
cg00379266
cg00379377
cg00379382
cg00379528
cg00379559
cg00379713
cg00379983
cg00380266
cg00380283
cg00380428
cg00380435
cg00380930
cg00381033
cg00381057
cg00381391
cg00382053
cg00382138
cg00382572
cg00382740
cg00382919
cg00383020
cg00383167
cg00383763
cg00383793
cg00384537
cg00384707
cg00385983
cg00386007
cg00386035
cg00386405
cg00386460
cg00386586
cg00387090
cg00387117
cg00387357
cg00387621
cg00387872
cg00387941
cg00388197
cg00388262
cg00388287
cg00388391
cg00388660
cg00388754
cg00388871
cg00389036
cg00389081
cg00389446
cg00389463
cg00389619
cg00389918
cg00390049
cg00390143
cg00390176
cg00390253
cg00390941
cg00391067
cg00391379
cg00392196
cg00392316
cg00392505
cg00393050
cg00393248
cg00393283
cg00393348
cg00393407
cg00393487
cg00393673
cg00393992
cg00394021
cg00394247
cg00394261
cg00394385
cg00394522
cg00394712
cg00395501
cg00395579
cg00395657
cg00395783
cg00395825
cg00395929
cg00396783
cg00396894
cg00396910
cg00397103
cg00397274
cg00397422
cg00397559
cg00397575
cg00397714
cg00397849
cg00397871
cg00398268
cg00399807
cg00399938
cg00400126
cg00400165
cg00400452
cg00400532
cg00400547
cg00401233
cg00401429
cg00401456
cg00401463
cg00401753
cg00401796
cg00401797
cg00402222
cg00402547
cg00403315
cg00403724
cg00403784
cg00404400
cg00404436
cg00405078
cg00405086
cg00405232
cg00405789
cg00405825
cg00406188
cg00406392
cg00406489
cg00406844
cg00406976
cg00407105
cg00407150
cg00407329
cg00407812
cg00407820
cg00407866
cg00408567
cg00408678
cg00408773
cg00409309
cg00409696
cg00409861
cg00410719
cg00410831
cg00410872
cg00411011
cg00411413
cg00411595
cg00411647
cg00411945
cg00411948
cg00412294
cg00412931
cg00413030
cg00413097
cg00413250
cg00413380
cg00413403
cg00413426
cg00413543
cg00414041
cg00414354
cg00415057
cg00415333
cg00415822
cg00415939
cg00416176
cg00416206
cg00416208
cg00416409
cg00417197
cg00417304
cg00417408
cg00417605
cg00417692
cg00418183
cg00418303
cg00418528
cg00418613
cg00418663
cg00418943
cg00419094
cg00419159
cg00419512
cg00419564
cg00419568
cg00419757
cg00419822
cg00420095
cg00420347
cg00420532
cg00420559
cg00420929
cg00421032
cg00421089
cg00421173
cg00421223
cg00421262
cg00421541
cg00421612
cg00421735
cg00421815
[truncated: 108,462 more rows]

## Sheet: SE_DGvsEC_mNS_HYPER-SE_DG
cg00558990
cg01078706
cg02397686
cg14290468
cg20752420
cg25273427

## Sheet: SE_DGvsTE-HYPER-SE_DG
cg00318111
cg00955035
cg01054110
cg01838004
cg02493798
cg02524112
cg02812891
cg03100639
cg03404566
cg03407747
cg03456213
cg03760483
cg03762994
cg04043571
cg04347477
cg05391884
cg05657792
cg05860111
cg05948411
cg06618298
cg06933697
cg07578331
cg09364688
cg09490371
cg09737314
cg10292376
cg10388456
cg11639950
cg11971771
cg12049875
cg12262378
cg13060114
cg13138089
cg13912311
cg14375499
cg14582057
cg15085899
cg15451250
cg15736127
cg15925365
cg16495212
cg16854876
cg17187521
cg17204652
cg17453840
cg18161890
cg19327615
cg19701087
cg20050826
cg21237687
cg22033586
cg22486834
cg22580512
cg22727783
cg22820108
cg24257776
cg24296765
cg24395117
cg24409808
cg26406891
cg26581206

## Sheet: SE_DGvsTE-HYPER-TE
cg00000236
cg00000292
cg00000658
cg00000807
cg00000957
cg00001364
cg00001687
cg00002531
cg00002769
cg00003014
cg00003187
cg00003513
cg00004219
cg00004533
cg00004775
cg00004979
cg00005072
cg00005164
cg00005619
cg00007036
cg00007076
cg00007239
cg00007324
cg00007466
cg00007987
cg00008452
cg00008629
cg00008671
cg00008810
cg00008932
cg00009001
cg00009293
cg00010789
cg00011460
cg00011482
cg00011754
cg00012194
cg00012343
cg00012395
cg00012692
cg00012920
cg00013196
cg00013374
cg00013733
cg00013993
cg00014085
cg00014152
cg00014445
cg00014733
cg00014837
cg00014900
cg00015603
cg00015699
cg00016255
cg00016406
cg00016522
cg00016593
cg00016618
cg00016783
cg00016996
cg00017121
cg00017363
cg00017475
cg00017931
cg00018010
cg00018044
cg00018539
cg00019076
cg00019151
cg00019576
cg00019841
cg00020340
cg00020390
cg00020419
cg00020794
cg00020991
cg00021152
cg00021786
cg00021855
cg00022076
cg00022235
cg00024170
cg00024198
cg00024404
cg00024494
cg00024967
cg00025211
cg00025626
cg00025715
cg00026455
cg00026474
cg00026546
cg00027995
cg00028211
cg00028338
cg00028431
cg00028677
cg00028757
cg00028993
cg00029640
cg00029973
cg00030125
cg00030432
cg00030588
cg00030682
cg00030909
cg00031013
cg00031063
cg00031491
cg00031708
cg00032192
cg00032643
cg00032701
cg00032884
cg00033551
cg00033773
cg00033806
cg00033877
cg00033915
cg00034650
cg00035000
cg00035074
cg00035268
cg00035316
cg00035452
cg00036263
cg00036570
cg00037056
cg00037223
cg00037314
cg00037406
cg00037457
cg00037763
cg00037930
cg00037940
cg00038131
cg00038239
cg00038877
cg00039070
cg00039129
cg00039480
cg00039864
cg00040427
cg00041014
cg00041047
cg00041898
cg00041989
cg00042254
cg00042325
cg00042611
cg00042657
cg00043005
cg00043080
cg00043284
cg00043800
cg00044318
cg00044950
cg00045515
cg00045748
cg00045787
cg00045900
cg00046021
cg00046410
cg00047815
cg00048436
cg00049380
cg00049894
cg00050224
cg00050271
cg00050289
cg00050938
cg00051590
cg00052046
cg00052433
cg00053086
cg00053728
cg00053851
cg00054248
cg00054301
cg00054408
cg00054572
cg00054890
cg00055052
cg00056489
cg00056767
cg00057114
cg00057240
cg00057272
cg00057593
cg00057791
cg00058163
cg00058449
cg00058644
cg00058923
cg00059165
cg00059240
cg00059854
cg00059879
cg00061150
cg00061264
cg00061306
cg00061520
cg00061635
cg00061695
cg00061805
cg00062776
cg00063291
cg00063456
cg00063503
cg00063979
cg00064255
cg00064531
cg00065088
cg00065302
cg00066360
cg00066508
cg00066554
cg00066919
cg00067058
cg00069417
cg00069642
cg00070908
cg00071274
cg00071446
cg00071869
cg00072957
cg00073713
cg00074313
cg00074471
cg00074851
cg00075698
cg00075920
cg00076313
cg00076538
cg00077450
cg00077457
cg00077738
cg00077838
cg00078245
cg00078270
cg00078456
cg00078759
cg00078857
cg00079169
cg00079224
cg00079302
cg00079388
cg00079785
cg00081019
cg00081046
cg00081084
cg00081347
cg00081602
cg00081835
cg00082411
cg00082833
cg00082981
cg00083262
cg00083265
cg00083801
cg00084398
cg00084435
cg00084577
cg00085061
cg00085199
cg00085281
cg00085747
cg00086113
cg00086334
cg00086730
cg00087153
cg00087568
cg00087735
cg00087898
cg00088251
cg00088691
cg00088989
cg00089100
cg00089214
cg00089430
cg00089512
cg00089945
cg00090103
cg00090197
cg00090265
cg00091760
cg00092518
cg00092551
cg00092644
cg00092711
cg00093436
cg00093829
cg00093956
cg00094158
cg00094751
cg00094913
cg00094943
cg00095214
cg00095259
cg00095396
cg00095688
cg00095870
cg00095918
cg00096039
cg00096065
cg00096447
cg00096536
cg00096979
cg00097088
cg00097384
cg00097619
cg00097639
cg00098297
cg00098951
cg00099383
cg00099519
cg00100564
cg00101227
cg00101715
cg00102183
cg00102512
cg00102726
cg00103209
cg00103329
cg00103568
cg00103908
cg00105306
cg00105400
cg00105475
cg00105852
cg00106609
cg00106925
cg00107106
cg00107241
cg00107890
cg00107914
cg00108038
cg00108716
cg00109062
cg00109551
cg00110171
cg00110277
cg00110609
cg00110724
cg00110785
cg00110790
cg00111463
cg00111532
cg00111613
cg00111677
cg00111823
cg00112048
cg00113050
cg00113194
cg00114312
cg00114346
cg00114710
cg00115567
cg00116172
cg00116699
cg00117012
cg00117311
cg00117896
cg00118229
cg00118507
cg00118712
cg00119053
cg00119279
cg00120172
cg00120358
cg00120825
cg00121045
cg00121374
cg00121884
cg00122406
cg00122851
cg00123017
cg00123181
cg00123324
cg00123652
cg00123762
cg00123906
cg00124836
cg00125048
cg00125349
cg00125544
cg00126173
cg00126636
cg00126946
cg00126995
cg00127198
cg00129232
cg00129549
cg00129563
cg00130530
cg00130693
cg00130799
cg00130808
cg00131557
cg00131691
cg00131705
cg00131871
cg00132149
cg00133223
cg00133234
cg00133536
cg00133970
cg00134728
cg00135038
cg00136173
cg00136787
cg00136968
cg00137696
cg00139092
cg00139389
cg00139496
cg00140786
cg00141153
cg00141447
cg00141929
cg00142933
cg00143376
cg00143527
cg00144022
cg00144180
cg00144414
cg00144425
cg00145141
cg00145352
cg00145404
cg00145596
cg00145838
cg00145911
cg00145955
cg00146233
cg00146249
cg00146645
cg00146669
cg00146755
cg00147095
cg00147286
cg00147627
cg00147788
cg00148127
cg00148286
cg00148522
cg00148892
cg00149692
cg00149716
cg00149976
cg00150231
cg00150245
cg00150837
cg00150848
cg00150874
cg00150989
cg00151007
cg00151709
cg00151732
cg00151768
cg00151906
cg00152411
cg00152543
cg00152611
cg00152708
cg00152799
cg00154986
cg00156001
cg00156403
cg00156991
cg00157043
cg00157319
cg00157562
cg00157864
cg00158442
cg00158530
cg00159503
cg00159799
cg00159908
cg00160002
cg00160505
cg00160667
cg00161556
cg00161683
cg00162001
cg00162421
cg00162611
cg00163006
cg00163510
cg00164038
cg00164189
cg00164235
cg00164458
cg00164462
cg00164837
cg00164894
cg00166234
cg00166868
cg00167684
cg00167958
cg00168191
cg00169111
cg00169184
cg00169677
cg00169737
cg00169930
cg00170236
cg00170369
cg00171166
cg00171290
cg00172074
cg00172227
cg00172410
cg00172794
cg00173170
cg00173538
cg00174252
cg00174743
cg00175153
cg00175441
cg00175579
cg00175702
cg00175844
cg00176066
cg00176675
cg00176835
cg00176879
cg00177239
cg00177657
cg00178119
cg00178122
cg00178224
cg00178635
cg00178850
cg00178877
cg00178984
cg00179196
cg00179532
cg00179921
cg00180225
cg00180470
cg00180930
cg00181419
cg00182256
cg00182937
cg00182994
cg00183639
cg00184394
cg00184524
cg00185004
cg00185032
cg00185122
cg00186499
cg00187244
cg00187327
cg00187503
cg00188627
cg00188971
cg00189176
cg00189989
cg00190065
cg00190738
cg00190795
cg00191052
cg00191102
cg00192773
cg00193902
cg00194886
cg00195796
cg00195828
cg00196150
cg00196660
cg00197028
cg00197173
cg00198729
cg00199549
cg00200653
cg00201133
cg00201196
cg00201296
cg00201568
cg00202479
cg00202561
cg00202819
cg00203913
cg00204049
cg00204159
cg00204249
cg00204649
cg00205598
cg00206063
cg00206639
cg00207279
cg00207856
cg00207873
cg00208012
cg00208024
cg00208830
cg00209066
cg00209206
cg00209398
cg00209484
cg00209893
cg00209918
cg00210042
cg00210133
cg00210768
cg00211337
cg00211855
cg00212114
cg00212979
cg00213080
cg00213119
cg00213301
cg00213606
cg00213643
cg00215224
cg00215425
cg00215431
cg00216138
cg00216180
cg00216570
cg00216693
cg00217171
cg00217442
cg00217553
cg00218415
cg00218767
cg00218893
cg00219151
cg00219282
cg00219585
cg00219855
cg00220302
cg00220413
cg00221654
cg00221709
cg00221736
cg00222625
cg00222656
cg00223703
cg00223877
cg00223963
cg00224174
cg00225006
cg00225067
cg00225618
cg00225917
cg00226265
cg00226340
cg00226615
cg00227665
cg00228689
cg00229508
cg00229809
cg00229868
cg00230120
cg00230205
cg00231207
cg00231875
cg00232105
cg00232160
cg00232388
cg00232996
cg00233335
cg00233594
cg00233887
cg00234261
cg00234294
cg00234975
cg00235313
cg00235460
cg00236077
cg00236141
cg00236249
cg00236601
cg00236766
cg00237876
cg00238362
cg00238593
cg00238692
cg00238815
cg00238899
cg00239025
cg00239074
cg00239117
cg00239419
cg00239420
cg00239964
cg00240178
cg00240195
cg00240598
cg00241281
cg00241650
cg00241664
cg00241712
cg00241813
cg00243120
cg00243272
cg00244040
cg00244352
cg00244391
cg00244462
cg00245465
cg00245746
cg00245856
cg00246280
cg00246547
cg00247629
cg00248174
cg00248521
cg00248574
cg00248776
cg00248805
cg00248856
cg00248875
cg00249522
cg00250500
cg00250525
cg00250805
cg00251594
cg00251875
cg00252095
cg00252733
cg00252781
cg00253339
cg00253971
cg00254095
cg00254486
cg00254608
cg00254888
cg00255752
cg00255799
cg00255882
cg00255919
cg00256046
cg00256068
cg00256074
cg00256081
cg00256155
cg00256591
cg00256632
cg00256785
cg00256932
cg00257303
cg00257455
cg00257712
cg00257775
cg00258499
cg00258779
cg00259019
cg00259234
cg00259404
cg00260387
cg00260803
cg00260818
cg00261144
cg00261690
cg00261875
cg00261912
cg00262263
cg00263307
cg00263650
cg00264129
cg00264236
cg00264346
cg00264500
cg00264958
cg00265788
cg00265826
cg00266968
cg00267274
cg00267296
cg00267323
cg00267373
cg00267862
cg00268149
cg00268744
cg00268967
cg00269033
cg00269287
cg00269996
cg00270093
cg00270654
cg00271311
cg00273220
cg00273543
cg00274365
cg00275103
cg00275234
cg00275628
cg00276214
cg00276752
cg00276918
cg00277233
cg00278107
cg00278131
cg00278366
cg00279773
cg00280619
cg00281776
cg00282704
cg00282731
cg00283344
cg00283662
cg00283742
cg00284780
cg00286102
cg00286497
cg00286512
cg00286701
cg00286717
cg00287016
cg00287165
cg00287541
cg00287737
cg00287974
cg00288598
cg00289094
cg00289503
cg00289762
cg00290498
cg00290944
cg00291051
cg00291054
cg00291661
cg00292071
cg00292290
cg00292432
cg00292540
cg00292978
cg00293189
cg00293245
cg00293616
cg00293626
cg00293644
cg00294109
cg00294776
cg00295339
cg00295426
cg00296378
cg00296643
cg00296652
cg00297721
cg00298357
cg00298405
cg00298475
cg00298595
cg00300046
cg00300303
cg00300908
cg00300999
cg00301018
cg00301192
cg00301677
cg00301679
cg00301998
cg00302030
cg00302076
cg00302587
cg00303989
cg00304959
cg00305285
cg00305585
cg00305629
cg00305874
cg00305996
cg00306267
cg00306395
cg00306909
cg00307254
cg00307685
cg00308130
cg00308159
cg00308185
cg00308984
cg00310201
cg00310257
cg00310391
cg00310410
cg00310728
cg00311133
cg00311303
cg00311371
cg00311667
cg00311751
cg00311768
cg00311984
cg00312125
cg00312809
cg00312985
cg00313865
cg00313872
cg00314904
cg00314994
cg00315816
cg00316222
cg00316223
cg00316420
cg00318084
cg00318347
cg00318436
cg00319157
cg00319334
cg00319595
cg00321082
cg00321867
cg00322201
cg00322698
cg00323457
cg00324592
cg00325528
cg00325866
cg00326559
cg00326785
cg00326908
cg00327072
cg00327106
cg00327483
cg00327516
cg00328058
cg00328210
cg00328497
cg00328523
cg00328817
cg00328971
cg00329272
cg00330318
cg00330518
cg00330789
cg00330825
cg00331032
cg00331210
cg00331501
cg00331677
cg00331740
cg00332680
cg00332937
cg00332950
cg00333622
cg00334056
cg00334274
cg00336022
cg00336220
cg00336291
cg00337020
cg00337090
cg00337181
cg00337957
cg00338329
cg00338529
cg00339488
cg00339600
cg00340138
cg00340161
cg00340349
cg00340584
cg00340847
cg00341060
cg00341191
cg00341204
cg00341415
cg00342313
cg00342953
cg00343127
cg00343906
cg00343986
cg00344202
cg00344358
cg00344411
cg00344719
cg00344801
cg00345343
cg00345425
cg00345621
cg00345792
cg00346180
cg00346256
cg00346266
cg00346376
cg00346446
cg00346501
cg00346623
cg00346883
cg00347563
cg00347584
cg00347882
cg00347938
cg00348598
cg00348623
cg00348763
cg00349061
cg00349460
cg00349982
cg00350304
cg00351472
cg00352560
cg00353407
cg00353675
cg00354542
cg00354863
cg00355315
cg00355360
cg00355447
cg00355784
cg00356131
cg00356499
cg00356645
cg00356769
cg00356811
cg00357176
cg00357213
cg00357494
cg00357671
cg00357958
cg00357988
cg00358023
cg00358132
cg00358451
cg00358516
cg00359285
cg00359511
cg00359604
cg00360267
cg00360610
cg00360798
cg00362381
cg00362665
cg00364051
cg00364557
cg00364696
cg00364814
cg00365963
cg00367863
cg00368356
cg00369357
cg00369613
cg00369786
cg00370227
cg00371355
cg00373120
cg00373148
cg00373371
cg00373376
cg00373397
cg00373422
cg00373967
cg00373991
cg00374015
cg00374546
cg00374554
cg00375581
cg00376480
cg00376816
cg00377065
cg00377332
cg00377344
cg00378423
cg00381745
cg00381789
cg00382227
cg00382632
cg00383081
cg00384553
cg00384632
cg00384653
cg00385441
cg00385956
cg00386008
cg00386101
cg00386961
cg00386984
cg00387107
cg00387445
cg00387551
cg00387982
cg00388154
cg00388439
cg00389406
cg00389552
cg00390654
cg00390694
cg00391229
cg00391352
cg00391741
cg00392003
cg00392075
cg00392156
cg00392257
cg00392396
cg00393193
cg00393254
cg00393340
cg00393373
cg00393470
cg00394180
cg00394581
cg00394583
cg00395291
cg00395296
cg00396158
cg00396604
cg00396673
cg00396981
cg00397104
cg00397144
cg00397179
cg00397585
cg00397989
cg00398617
cg00398880
cg00399027
cg00399059
cg00399107
cg00399378
cg00400189
cg00400262
cg00400263
cg00400654
cg00400743
cg00401091
cg00401433
cg00402737
cg00402873
cg00403616
cg00404788
cg00405043
cg00405356
cg00405484
cg00405699
cg00406022
cg00406319
cg00407413
cg00407484
cg00407988
cg00408224
cg00408231
cg00408764
cg00408776
cg00408876
cg00409245
cg00409260
cg00409552
cg00409700
cg00409816
cg00410034
cg00410422
cg00410650
cg00411072
cg00411411
cg00412142
cg00412239
cg00413066
cg00414013
cg00414709
cg00415276
cg00415389
cg00415704
cg00415924
cg00416130
cg00416243
cg00416475
cg00416945
cg00417025
cg00417071
cg00417147
cg00417288
cg00417576
cg00417807
cg00417963
cg00418068
cg00418479
cg00418913
cg00419092
cg00419123
cg00420742
cg00420879
cg00420884
cg00421164
cg00421205
cg00421335
cg00421585
cg00421624
cg00421846
cg00422714
cg00423114
cg00423195
cg00423398
cg00423597
cg00423871
cg00424152
cg00424166
cg00426425
cg00427553
cg00427834
cg00427847
cg00428160
cg00428526
cg00430542
cg00431336
cg00431602
cg00431699
cg00431813
cg00432461
cg00432497
cg00432872
cg00433292
cg00433404
cg00433418
cg00433861
cg00433887
cg00434413
cg00434461
cg00434575
cg00434991
cg00435173
cg00435469
cg00435606
cg00436722
cg00437048
cg00437192
cg00437228
cg00437258
cg00438946
cg00439318
cg00439735
cg00441027
cg00441079
cg00441136
cg00441899
cg00442220
cg00442267
cg00442931
cg00443981
cg00445142
cg00445548
cg00446003
cg00446065
cg00446250
cg00446595
cg00446803
cg00446807
cg00447068
cg00447277
cg00447469
cg00447581
cg00447582
cg00447769
cg00447867
cg00448191
cg00450029
cg00450719
cg00450979
cg00451102
cg00451413
cg00451651
cg00451807
cg00452079
cg00452266
cg00452400
cg00452755
cg00452835
cg00453808
cg00454447
cg00454734
cg00454856
cg00454961
cg00455331
cg00455546
cg00457115
cg00457258
cg00457596
cg00457650
cg00457915
cg00458652
cg00458793
cg00458829
cg00458927
cg00459119
cg00459243
cg00459312
cg00460457
cg00460639
cg00460763
cg00460818
cg00460944
cg00461682
cg00461770
cg00461882
cg00462362
cg00462560
cg00462951
cg00463011
cg00463460
cg00463485
cg00464768
cg00464773
cg00464927
cg00465247
cg00465927
cg00466827
cg00466839
cg00467278
cg00467652
cg00467904
cg00469083
cg00469473
cg00469547
cg00469757
cg00469800
cg00469995
cg00470040
cg00470154
cg00470761
cg00471309
cg00471371
cg00471903
cg00472687
cg00472748
cg00472841
cg00473045
cg00473257
cg00473531
cg00473985
cg00474080
cg00474840
cg00474854
cg00474873
cg00474943
cg00475194
cg00475403
cg00476054
cg00476149
cg00476872
cg00477017
cg00477287
cg00477538
cg00477582
cg00479208
cg00479347
cg00479908
cg00480429
cg00480698
cg00480856
cg00482994
cg00483345
cg00483459
cg00483825
cg00483891
cg00484803
cg00485312
cg00485707
cg00486022
cg00486122
cg00486340
cg00486525
cg00487142
cg00487456
cg00487533
cg00487831
cg00487848
cg00487989
cg00488734
cg00488747
cg00488842
cg00489699
cg00489902
cg00489988
cg00490543
cg00491412
cg00492055
cg00492083
cg00492092
cg00492309
cg00492333
cg00492691
cg00492957
cg00493389
cg00494544
cg00494683
cg00494710
cg00495035
cg00495036
cg00495443
cg00495574
cg00495708
cg00495740
cg00495909
cg00496378
cg00496504
cg00496629
cg00496769
cg00496988
cg00497046
cg00497219
cg00497472
cg00497796
cg00497956
cg00498392
cg00499245
cg00499822
cg00500176
cg00500213
cg00500299
cg00500448
cg00501242
cg00501542
cg00501765
cg00502028
cg00502209
cg00502241
cg00502509
cg00502618
cg00502885
cg00503690
cg00503917
cg00503920
cg00503998
cg00504248
cg00504599
cg00505570
cg00505597
cg00506442
cg00506540
cg00506590
cg00506625
cg00506862
cg00507008
cg00507477
cg00507823
cg00508534
cg00508851
cg00508855
cg00509007
cg00509207
cg00509451
cg00509898
cg00510025
cg00510087
cg00510094
cg00510331
cg00510552
cg00510948
cg00510956
cg00510991
cg00511027
cg00512103
cg00512563
cg00513012
cg00513208
cg00513334
cg00513611
cg00513781
cg00513803
cg00513981
cg00513984
cg00514186
cg00514407
cg00515437
cg00516515
cg00516616
cg00516870
cg00516881
cg00517080
cg00517787
cg00518029
cg00518266
cg00519153
cg00519483
cg00520612
cg00520933
cg00521399
cg00521744
cg00522231
cg00522555
cg00522588
cg00523241
cg00524296
cg00524781
cg00525145
cg00525436
cg00525828
cg00526336
cg00526711
cg00528191
cg00529422
cg00529757
cg00529909
cg00529910
cg00530127
cg00530298
cg00530414
cg00530638
cg00530650
cg00531009
cg00531246
cg00531789
cg00531865
cg00532455
cg00532492
cg00532502
cg00533340
cg00534163
cg00534318
cg00534371
cg00534380
cg00534858
cg00535403
cg00535430
cg00535785
cg00537910
cg00537979
cg00538695
cg00538717
cg00539174
cg00539564
cg00539955
cg00540400
cg00540637
cg00540722
cg00540828
cg00540850
cg00541089
cg00541350
cg00541638
cg00542041
cg00542760
cg00543406
cg00543460
cg00543604
cg00543735
cg00543840
cg00544914
cg00547143
cg00547480
cg00547727
cg00547768
cg00548595
cg00548618
cg00548824
cg00549018
cg00549398
cg00549412
cg00549574
cg00549706
cg00549798
cg00549988
cg00550747
cg00551589
cg00551617
cg00551733
cg00551957
cg00552369
cg00552600
cg00552753
cg00552868
cg00552973
cg00553195
cg00553355
cg00554068
cg00554070
cg00554352
cg00554421
cg00554570
cg00554604
cg00554948
cg00554973
cg00556408
cg00556570
cg00556614
cg00558219
cg00558315
cg00558702
cg00559444
cg00559635
cg00559919
cg00559935
cg00560277
cg00561081
cg00561739
cg00561891
cg00562139
cg00562180
cg00562262
cg00562430
cg00562504
cg00562598
cg00562879
cg00562916
cg00563045
cg00563061
cg00563300
cg00564212
cg00564546
cg00565075
cg00565090
cg00565263
cg00565348
cg00565658
cg00566408
cg00566713
cg00567298
cg00567872
cg00568164
cg00568384
cg00568984
cg00569190
cg00569276
cg00569418
cg00569808
cg00570069
cg00570088
cg00570391
cg00570469
cg00570849
cg00571090
cg00571101
cg00571178
cg00571434
cg00572212
cg00573248
cg00573338
cg00573352
cg00573504
cg00574278
cg00575066
cg00575090
cg00575896
cg00576086
cg00576108
cg00576435
cg00576967
cg00577364
cg00577417
cg00578354
cg00578363
cg00578414
cg00578437
cg00578645
cg00578885
cg00579502
cg00579595
cg00579794
cg00579859
cg00580354
cg00580604
cg00581043
cg00581541
cg00581590
cg00581595
cg00581603
cg00581617
cg00581720
cg00582308
cg00582531
cg00582574
cg00582671
cg00583291
cg00584815
cg00584955
cg00585033
cg00585076
cg00585213
cg00585219
cg00585551
cg00585621
cg00585776
cg00586275
cg00586317
cg00586551
cg00586623
cg00587042
cg00587613
cg00587628
cg00588090
cg00588559
cg00589520
cg00589581
cg00589617
cg00590029
cg00590152
cg00590320
cg00590500
cg00591471
cg00591515
cg00592411
cg00593699
cg00594148
cg00595039
cg00595889
cg00596184
cg00597492
cg00597751
cg00597931
cg00598021
cg00598235
cg00598600
cg00599328
cg00599809
cg00599850
cg00599914
cg00600029
cg00600684
cg00601124
cg00601162
cg00601311
cg00601743
cg00602371
cg00602726
cg00603371
cg00604193
cg00604454
cg00605763
cg00605831
cg00606900
cg00607154
cg00607630
cg00607912
cg00608779
cg00609296
cg00609673
cg00609948
cg00609961
cg00611192
cg00611397
cg00611469
cg00612202
cg00612508
cg00612828
cg00613177
cg00613732
cg00613914
cg00614081
cg00614360
cg00614644
cg00614959
cg00615592
cg00615919
cg00616650
cg00616922
cg00617064
cg00617415
cg00617867
cg00617975
cg00618183
cg00618291
cg00618323
cg00618507
cg00619097
cg00619168
cg00619245
cg00619345
cg00619505
cg00619592
cg00620024
cg00620476
cg00620824
cg00620857
cg00621197
cg00621289
cg00621407
cg00621899
cg00622749
cg00622763
cg00623111
cg00624908
cg00625354
cg00625443
cg00625845
cg00625963
cg00626422
cg00626466
cg00627347
cg00628185
cg00628211
cg00629102
cg00629688
cg00630007
cg00630080
cg00630237
cg00630775
cg00630781
cg00632188
cg00632496
cg00632549
cg00632575
cg00633933
cg00634573
cg00634653
cg00635356
cg00635590
cg00636072
cg00636145
cg00636427
cg00637433
cg00638202
cg00638210
cg00638384
cg00639010
cg00639041
cg00639517
cg00640253
cg00640376
cg00640479
cg00640775
cg00641127
cg00642330
cg00642501
cg00643272
cg00643876
cg00645431
cg00645579
cg00646731
cg00647095
cg00647720
cg00647769
cg00647879
cg00647881
cg00648203
cg00648573
cg00648582
cg00648660
cg00649500
cg00649734
cg00650088
cg00651185
cg00651912
cg00653025
cg00653281
cg00653997
cg00654296
cg00655147
cg00656410
cg00657529
cg00657706
cg00659029
cg00659035
cg00660232
cg00660305
cg00660452
cg00660626
cg00660655
cg00660817
cg00661018
cg00661523
cg00662273
cg00662446
cg00662646
cg00663068
cg00663376
cg00663396
cg00663519
cg00663584
cg00663719
cg00664021
cg00665482
cg00665816
cg00666047
cg00666559
cg00667841
cg00668103
cg00669182
cg00669347
cg00670339
cg00670539
cg00670915
cg00671126
cg00671823
cg00672277
cg00672333
cg00672558
cg00673724
cg00674395
cg00674415
cg00674428
cg00674628
cg00675600
cg00676925
cg00676960
cg00677686
cg00677730
cg00678005
cg00678398
cg00678709
cg00678938
cg00679209
cg00679383
cg00679681
cg00679711
cg00679877
cg00679960
cg00680277
cg00681278
cg00682069
cg00682090
cg00682103
cg00682125
cg00682553
cg00682734
cg00682802
cg00683665
cg00684032
cg00684423
cg00685480
cg00685795
cg00685971
cg00686030
cg00686197
cg00686643
cg00686694
cg00686823
cg00688125
cg00688681
cg00688802
cg00688803
cg00688979
cg00689612
cg00690392
cg00690609
cg00691266
cg00691598
cg00691940
cg00692151
cg00692760
cg00693240
cg00694180
cg00694777
cg00695943
cg00696472
cg00696763
cg00697057
cg00697301
cg00697639
cg00697703
cg00697916
cg00698067
cg00698982
cg00699693
cg00700436
cg00700466
cg00700487
cg00700638
cg00701755
cg00701809
cg00701856
cg00701918
cg00701992
cg00702148
cg00702307
cg00702729
cg00703040
cg00703120
cg00703441
cg00703843
cg00703902
cg00704796
cg00704869
cg00704873
cg00705922
cg00706570
cg00707134
cg00707777
cg00708789
cg00709393
cg00709423
cg00709966
cg00710196
cg00710249
cg00710366
cg00710721
cg00710938
cg00711496
cg00711542
cg00711584
cg00711596
cg00711896
cg00712280
cg00712792
cg00713066
cg00713247
cg00713253
cg00713275
cg00714115
cg00714713
cg00715343
cg00715835
cg00716294
cg00716309
cg00716470
cg00716812
cg00716961
cg00717080
cg00717219
cg00717279
cg00717678
cg00717680
cg00717808
cg00717995
cg00718039
cg00718129
[truncated: 54,764 more rows]

## Sheet: EC_mNSvsTE_HYPER-EC_mNS
cg00000321
cg00000363
cg00002033
cg00002646
cg00004257
cg00005740
cg00006081
cg00006397
cg00007644
cg00008036
cg00014830
cg00017489
cg00017970
cg00021242
cg00021256
cg00021540
cg00023750
cg00024046
cg00024086
cg00024416
cg00024471
cg00025496
cg00026327
cg00026703
cg00027400
cg00028013
cg00030005
cg00030627
cg00035197
cg00035398
cg00035980
cg00036011
cg00036732
cg00039489
cg00039801
cg00040067
cg00040837
cg00041328
cg00041666
cg00043004
cg00043379
cg00043599
cg00043790
cg00044505
cg00044665
cg00044796
cg00046899
cg00049047
cg00053073
cg00056066
cg00056578
cg00058708
cg00058879
cg00060649
cg00062245
cg00062282
cg00063982
cg00064020
cg00064261
cg00066239
cg00066663
cg00066942
cg00068408
cg00070715
cg00072689
cg00076497
cg00081417
cg00081799
cg00084347
cg00085619
cg00086670
cg00087792
cg00088130
cg00089550
cg00090261
cg00092309
cg00093522
cg00093688
cg00097146
cg00097450
cg00097452
cg00098144
cg00101457
cg00101602
cg00101940
cg00107603
cg00107970
cg00109451
cg00113369
cg00113663
cg00113675
cg00117869
cg00118317
cg00118808
cg00119241
cg00120473
cg00120783
cg00121339
cg00123001
cg00123090
cg00125005
cg00126261
cg00126889
cg00127408
cg00133476
cg00145419
cg00145875
cg00146676
cg00147509
cg00148825
cg00151914
cg00154888
cg00155526
cg00156551
cg00157477
cg00158528
cg00158539
cg00160583
cg00160619
cg00162231
cg00162806
cg00164949
cg00167820
cg00169776
cg00170213
cg00171725
cg00172672
cg00172849
cg00173504
cg00173659
cg00176043
cg00176863
cg00177127
cg00177698
cg00177797
cg00179070
cg00180666
cg00181432
cg00182273
cg00182758
cg00186909
cg00187692
cg00187933
cg00190355
cg00191858
cg00192882
cg00193613
cg00193959
cg00195749
cg00197517
cg00200803
cg00202441
cg00202711
cg00203594
cg00207280
cg00207352
cg00210249
cg00211661
cg00214530
cg00218103
cg00218409
cg00220225
cg00220737
cg00220952
cg00221070
cg00222015
cg00231504
cg00231728
cg00232453
cg00232500
cg00234616
cg00236832
cg00237268
cg00237475
cg00238510
cg00239870
cg00243281
cg00245538
cg00247599
cg00247631
cg00248454
cg00249511
cg00250422
cg00251405
cg00252615
cg00253228
cg00254556
cg00254681
cg00255732
cg00257920
cg00258409
cg00258597
cg00258809
cg00259097
cg00259886
cg00260116
cg00261900
cg00262621
cg00264799
cg00266920
cg00266983
cg00270764
cg00270799
cg00272971
cg00273198
cg00277898
cg00278392
cg00280177
cg00280609
cg00281467
cg00283576
cg00283857
cg00284146
cg00286125
cg00286773
cg00287477
cg00289258
cg00291366
cg00292947
cg00296038
cg00296121
cg00299893
cg00300822
cg00303541
cg00304388
cg00305281
cg00312921
cg00314029
cg00317355
cg00317577
cg00318573
cg00318899
cg00320035
cg00321007
cg00321056
cg00330170
cg00330929
cg00333483
cg00334798
cg00335286
cg00338391
cg00338749
cg00339331
cg00339415
cg00339782
cg00339913
cg00341742
cg00343092
cg00343633
cg00344577
cg00345522
cg00346320
cg00346326
cg00346434
cg00346985
cg00347198
cg00350296
cg00352417
cg00354381
cg00354884
cg00356183
cg00356361
cg00357551
cg00358609
cg00360474
cg00363082
cg00363750
cg00366531
cg00367135
cg00369024
cg00369658
cg00370608
cg00371061
cg00371134
cg00371702
cg00373616
cg00374492
cg00374839
cg00376544
cg00376625
cg00376910
cg00377358
cg00378510
cg00378730
cg00379420
cg00380924
cg00381131
cg00381684
cg00384847
cg00388471
cg00394658
cg00395063
cg00397127
cg00399483
cg00399951
cg00400259
cg00400532
cg00400614
cg00400733
cg00400964
cg00401972
cg00406542
cg00407944
cg00409356
cg00409434
cg00410926
cg00412337
cg00413352
cg00413617
cg00414485
cg00415993
cg00416934
cg00417151
cg00417408
cg00417823
cg00419564
cg00420361
cg00420859
cg00421848
cg00421990
cg00422120
cg00423035
cg00423700
cg00425827
cg00425843
cg00425918
cg00427150
cg00430036
cg00430080
cg00431050
cg00431324
cg00433406
cg00436254
cg00439790
cg00442109
cg00442112
cg00447376
cg00447817
cg00449390
cg00455523
cg00457087
cg00457403
cg00458754
cg00458890
cg00459623
cg00459816
cg00460436
cg00460983
cg00461650
cg00463202
cg00463859
cg00465319
cg00466108
cg00473031
cg00473416
cg00478421
cg00479240
cg00480161
cg00481600
cg00481629
cg00481951
cg00483893
cg00484122
cg00484396
cg00489401
cg00490203
cg00490583
cg00490606
cg00491021
cg00492341
cg00495476
cg00496026
cg00498024
cg00498604
cg00498804
cg00499837
cg00500027
cg00500498
cg00500507
cg00501467
cg00502062
cg00502190
cg00503017
cg00503866
cg00504569
cg00505045
cg00505133
cg00508131
cg00508697
cg00509485
cg00509649
cg00511334
cg00511475
cg00512280
cg00513952
cg00514268
cg00514895
cg00515814
cg00516966
cg00517001
cg00521464
cg00522018
cg00524220
cg00525722
cg00526276
cg00527825
cg00529236
cg00532411
cg00532474
cg00533407
cg00533891
cg00536939
cg00537210
cg00538458
cg00539360
cg00541718
cg00543976
cg00544337
cg00545702
cg00546248
cg00546448
cg00547441
cg00547484
cg00548268
cg00549040
cg00549064
cg00555268
cg00555905
cg00556112
cg00557630
cg00557996
cg00558215
cg00560542
cg00562118
cg00562312
cg00563678
cg00566320
cg00566369
cg00567749
cg00571021
cg00571809
cg00572266
cg00572843
cg00574917
cg00575005
cg00577488
cg00578304
cg00579036
cg00581422
cg00582971
cg00583328
cg00586644
cg00588517
cg00590260
cg00590620
cg00591333
cg00591949
cg00592510
cg00593404
cg00594011
cg00594099
cg00594129
cg00598204
cg00600617
cg00603097
cg00604410
cg00605777
cg00606902
cg00607051
cg00609135
cg00610310
cg00611789
cg00612595
cg00613224
cg00613284
cg00614157
cg00624418
cg00624477
cg00626110
cg00626312
cg00626702
cg00627241
cg00628697
cg00628788
cg00633062
cg00634665
cg00636508
cg00637477
cg00638021
cg00642970
cg00643814
cg00646381
cg00647217
cg00647658
cg00649632
cg00651488
cg00652846
cg00653387
cg00653790
cg00655094
cg00655913
cg00657094
cg00657582
cg00660167
cg00661205
cg00663183
cg00663972
cg00663986
cg00664406
cg00665420
cg00668519
cg00673191
cg00674896
cg00677574
cg00677901
cg00679546
cg00680827
cg00684178
cg00686083
cg00686339
cg00686404
cg00686915
cg00687447
cg00689492
cg00691948
cg00692367
cg00692610
cg00694258
cg00695391
cg00698263
cg00698688
cg00699461
cg00699945
cg00699947
cg00700239
cg00700485
cg00701692
cg00702126
cg00702840
cg00703513
cg00705851
cg00710180
cg00711088
cg00716257
cg00719165
cg00719211
cg00722329
cg00725635
cg00726046
cg00727590
cg00727630
cg00730172
cg00730561
cg00730887
cg00732348
cg00734904
cg00735667
cg00736459
cg00739471
cg00740813
cg00741624
cg00741900
cg00745725
cg00748149
cg00748589
cg00752099
cg00752195
cg00753548
cg00753630
cg00756062
cg00756943
cg00757082
cg00758229
cg00760872
cg00765705
cg00765830
cg00765922
cg00766964
cg00767010
cg00769161
cg00769305
cg00770316
cg00773233
cg00773902
cg00780574
cg00780971
cg00781208
cg00782188
cg00783525
cg00783748
cg00785620
cg00785738
cg00785980
cg00787856
cg00788204
cg00788521
cg00789671
cg00790126
cg00790255
cg00791321
cg00794881
cg00795248
cg00795277
cg00797058
cg00801512
cg00801571
cg00803827
cg00805562
cg00805619
cg00806239
cg00807464
cg00808721
cg00810208
cg00810971
cg00813378
cg00814985
cg00815214
cg00816039
cg00819233
cg00819619
cg00820718
cg00822361
cg00822998
cg00826203
cg00827176
cg00830029
cg00830492
cg00831710
cg00832105
cg00835193
cg00838423
cg00838898
cg00838919
cg00844950
cg00847277
cg00848392
cg00849148
cg00849854
cg00852924
cg00854817
cg00855466
cg00858415
cg00861646
cg00861772
cg00862116
cg00862894
cg00864171
cg00864618
cg00868523
cg00869941
cg00870242
cg00871133
cg00872683
cg00874605
cg00875272
cg00875989
cg00876704
cg00880452
cg00881010
cg00881207
cg00882235
cg00884093
cg00884334
cg00885918
cg00887602
cg00889398
cg00890208
cg00890485
cg00891278
cg00892567
cg00893368
cg00901161
cg00902104
cg00903099
cg00904786
cg00906812
cg00907204
cg00909286
cg00910067
cg00910715
cg00912191
cg00914626
cg00916536
cg00916854
cg00917154
cg00918541
cg00919077
cg00919971
cg00920938
cg00924855
cg00926215
cg00927035
cg00927495
cg00930455
cg00930873
cg00931644
cg00934017
cg00934120
cg00937271
cg00938743
cg00939495
cg00941836
cg00942219
cg00943360
cg00944421
cg00946245
cg00948520
cg00950265
cg00950343
cg00950718
cg00952322
cg00953327
cg00954382
cg00956199
cg00956759
cg00956964
cg00960700
cg00961617
cg00961640
cg00966398
cg00966920
cg00970325
cg00970396
cg00977707
cg00980410
cg00981267
cg00982984
cg00983437
cg00983899
cg00985040
cg00986191
cg00986742
cg00987015
cg00989258
cg00990022
cg00990385
cg00990587
cg00991875
cg00994601
cg00995253
cg00998427
cg00998784
cg01004056
cg01007374
cg01012026
cg01013590
cg01014262
cg01014615
cg01017395
cg01019875
cg01020696
cg01020744
cg01020801
cg01022121
cg01022780
cg01023769
cg01023787
cg01025434
cg01025836
cg01027151
cg01027750
cg01030404
cg01030534
cg01033356
cg01035261
cg01038640
cg01041222
cg01042368
cg01043865
cg01045118
cg01046376
cg01046798
cg01047586
cg01048445
cg01052636
cg01052699
cg01053681
cg01054354
cg01055281
cg01055579
cg01055633
cg01057552
cg01057945
cg01058602
cg01059609
cg01059881
cg01059913
cg01061424
cg01062113
cg01062247
cg01065278
cg01066157
cg01066936
cg01068259
cg01069159
cg01070078
cg01070987
cg01072057
cg01072388
cg01072942
cg01074676
cg01076459
cg01076874
cg01079651
cg01080713
cg01080924
cg01081168
cg01084693
cg01085165
cg01085461
cg01085553
cg01085837
cg01086446
cg01087239
cg01087977
cg01088404
cg01094950
cg01095004
cg01097384
cg01097872
cg01097897
cg01099231
cg01102270
cg01102307
cg01103911
cg01104306
cg01105963
cg01106338
cg01106572
cg01107142
cg01107741
cg01107801
cg01110290
cg01114088
cg01114937
cg01115857
cg01116137
cg01116477
cg01117269
cg01119145
cg01119407
cg01120953
cg01127291
cg01127300
cg01129886
cg01130406
cg01132150
cg01132696
cg01133433
cg01137065
cg01138098
cg01138652
cg01142635
cg01142710
cg01143579
cg01146320
cg01146324
cg01154254
cg01155930
cg01157952
cg01158680
cg01158822
cg01160557
cg01161644
cg01161811
cg01162900
cg01163366
cg01164584
cg01166892
cg01167615
cg01169778
cg01172150
cg01172419
cg01176947
cg01178099
cg01181227
cg01183965
cg01185080
cg01185093
cg01185626
cg01185921
cg01187920
cg01189112
cg01190024
cg01194538
cg01195564
cg01196336
cg01200060
cg01204844
cg01205087
cg01205584
cg01207650
cg01209566
cg01209984
cg01210550
cg01211852
cg01219553
cg01220680
cg01226278
cg01228134
cg01228685
cg01229452
cg01231108
cg01231141
cg01232040
cg01232726
cg01233934
cg01234133
cg01234379
cg01237056
cg01243312
cg01246617
cg01249187
cg01250001
cg01257171
cg01257697
cg01258751
cg01261798
cg01262667
cg01263631
cg01263942
cg01264298
cg01265860
cg01266850
cg01268541
cg01269514
cg01269620
cg01271455
cg01272967
cg01274122
cg01274660
cg01275038
cg01275133
cg01276497
cg01281157
cg01282074
cg01283096
cg01283246
cg01286655
cg01287054
cg01287376
cg01287514
cg01287936
cg01287975
cg01290869
cg01291088
cg01292299
cg01292846
cg01293647
cg01294283
cg01294327
cg01295399
cg01295631
cg01296360
cg01297627
cg01297721
cg01298514
cg01300434
cg01300852
cg01302136
cg01302656
cg01303723
cg01304809
cg01304890
cg01305625
cg01307130
cg01308258
cg01308827
cg01312828
cg01314044
cg01314810
cg01315201
cg01321816
cg01323777
cg01324372
cg01326048
cg01328473
cg01328833
cg01329179
cg01330316
cg01331461
cg01336781
cg01336912
cg01338084
cg01341487
cg01342746
cg01344797
cg01346423
cg01346501
cg01347048
cg01348424
cg01350680
cg01352090
cg01352108
cg01352175
cg01353073
cg01353646
cg01355392
cg01355757
cg01356198
cg01356703
cg01356872
cg01357292
cg01357958
cg01360115
cg01360119
cg01363714
cg01368900
cg01373602
cg01375976
cg01376829
cg01377358
cg01377503
cg01378667
cg01380884
cg01381367
cg01382414
cg01385708
cg01386493
cg01387450
cg01387771
cg01392518
cg01395690
cg01396587
cg01399219
cg01405445
cg01406456
cg01408363
cg01408860
cg01410415
cg01411725
cg01416712
cg01418256
cg01419914
cg01420426
cg01420491
cg01422009
cg01422249
cg01423394
cg01424562
cg01425967
cg01426903
cg01426968
cg01427575
cg01428095
cg01428589
cg01429391
cg01429449
cg01431063
cg01434523
cg01437411
cg01437439
cg01439383
cg01439754
cg01441359
cg01442601
cg01443852
cg01445580
cg01446798
cg01447281
cg01451162
cg01453052
cg01453551
cg01454487
cg01456368
cg01457143
cg01457778
cg01459807
cg01460436
cg01466288
cg01466615
cg01466976
cg01467100
cg01467266
cg01467789
cg01471111
cg01471293
cg01473983
cg01474257
cg01475577
cg01477835
cg01484296
cg01484487
cg01485548
cg01486558
cg01486818
cg01487468
cg01490807
cg01492626
cg01493297
cg01494702
cg01496199
cg01496203
cg01498231
cg01498829
cg01498900
cg01501551
cg01502588
cg01502811
cg01503348
cg01505767
cg01508380
cg01509330
cg01511231
cg01511480
cg01511567
cg01511806
cg01512026
cg01512787
cg01513063
cg01513078
cg01513157
cg01514033
cg01514415
cg01515543
cg01518246
cg01518607
cg01519299
cg01521274
cg01524893
cg01525839
cg01528369
cg01532206
cg01536979
cg01537645
cg01537995
cg01538731
cg01538769
cg01538998
cg01539484
cg01539849
cg01540571
cg01542019
cg01544903
cg01545587
cg01547915
cg01548463
cg01549940
cg01552275
cg01553632
cg01554437
cg01555791
cg01556275
cg01557027
cg01557648
cg01558645
cg01559356
cg01562537
cg01563704
cg01564818
cg01565028
cg01565130
cg01565438
cg01566166
cg01571001
cg01572513
cg01572652
cg01572696
cg01573089
cg01573747
cg01574390
cg01578164
cg01578632
cg01580681
cg01581024
cg01583021
cg01583969
cg01585794
cg01590848
cg01591227
cg01595366
cg01596834
cg01599709
cg01601050
cg01603847
cg01603973
cg01604380
cg01604883
cg01605435
cg01607321
cg01607849
cg01608400
cg01610632
cg01611777
cg01613249
cg01616349
cg01618923
cg01619846
cg01620165
cg01620701
cg01621054
cg01622304
cg01623825
cg01624229
cg01624414
cg01624571
cg01626707
cg01628067
cg01629007
cg01633184
cg01634146
cg01634664
cg01635086
cg01635555
cg01636354
cg01636582
cg01636591
cg01637233
cg01638369
cg01641455
cg01642461
cg01642521
cg01644731
cg01646323
cg01646639
cg01647729
cg01648609
cg01649334
cg01649773
cg01651284
cg01652021
cg01652665
cg01656955
cg01657207
cg01658815
cg01661897
cg01664241
cg01670430
cg01675158
cg01678292
cg01678309
cg01678833
cg01679328
cg01679682
cg01681525
cg01681847
cg01683883
cg01684256
cg01684586
cg01687862
cg01688202
cg01693026
cg01694331
cg01695225
cg01695406
cg01695994
cg01696114
cg01698448
cg01699740
cg01700290
cg01701555
cg01702431
cg01703329
cg01705934
cg01708377
cg01710158
cg01711160
cg01713505
cg01715088
cg01715525
cg01715538
cg01721754
cg01726273
cg01726775
cg01729837
cg01729862
cg01731685
cg01733638
cg01734772
cg01735082
cg01735357
cg01743841
cg01743901
cg01747665
cg01749539
cg01751605
cg01751992
cg01753208
cg01753263
cg01753788
cg01754958
cg01757168
cg01758314
cg01763090
cg01763749
cg01764011
cg01764252
cg01765111
cg01765545
cg01766396
cg01770755
cg01775245
cg01776278
cg01779559
cg01781417
cg01781529
cg01781867
cg01782668
cg01782798
cg01783353
cg01783960
cg01786048
cg01786466
cg01787285
cg01788396
cg01788994
cg01789980
cg01790438
cg01790771
cg01793945
cg01794501
cg01795562
cg01795955
cg01798261
cg01802545
cg01804193
cg01806741
cg01810111
cg01810329
cg01812577
cg01813335
cg01815538
cg01815671
cg01817009
cg01820777
cg01820962
cg01821923
cg01824466
cg01824919
cg01826211
cg01826444
cg01827726
cg01827761
cg01827999
cg01828061
cg01829163
cg01832586
cg01834979
cg01839464
cg01843034
cg01843264
cg01851378
cg01851968
cg01856162
cg01856752
cg01859228
cg01859237
cg01860706
cg01860743
cg01863510
cg01863682
cg01866518
cg01868869
cg01870916
cg01871214
cg01872024
cg01872216
cg01874562
cg01877352
cg01877595
cg01877920
cg01878724
cg01879473
cg01882539
cg01883159
cg01883427
cg01884057
cg01885291
cg01887804
cg01893963
cg01894038
cg01894366
cg01894875
cg01895740
cg01897500
cg01899038
cg01899130
cg01899620
cg01900413
cg01904243
cg01906600
cg01906944
cg01909160
cg01910639
cg01912455
cg01912955
cg01915791
cg01915885
cg01918604
cg01919204
cg01919208
cg01919652
cg01923692
cg01924084
cg01924434
cg01926238
cg01926614
cg01927825
cg01931222
cg01931893
cg01932956
cg01934626
cg01935747
cg01937055
cg01937840
cg01942106
cg01942372
cg01945183
cg01946451
cg01946707
cg01947415
cg01947583
cg01948201
cg01948724
cg01950665
cg01953087
cg01954585
cg01955745
cg01960686
cg01961752
cg01962146
cg01963734
cg01964152
cg01964337
cg01965173
cg01966665
cg01968493
cg01971181
cg01971813
cg01973695
cg01980793
cg01981187
cg01982724
cg01983293
cg01986016
cg01987202
cg01989857
cg01989908
cg01990695
cg01995743
cg01995938
cg01996116
cg01997461
cg01998806
cg01998808
cg01999539
cg02000328
cg02002258
cg02003184
cg02007433
cg02010763
cg02011374
cg02011706
cg02013239
cg02014020
cg02016467
cg02017015
cg02017926
cg02018291
cg02019125
cg02022339
cg02023043
cg02026235
cg02027945
cg02030141
cg02030652
cg02033213
cg02034311
cg02034689
cg02035733
cg02038323
cg02042310
cg02042649
cg02045493
cg02045669
cg02049210
cg02050917
cg02050986
cg02051616
cg02051941
cg02052531
cg02052726
cg02056062
cg02056098
cg02056653
cg02056794
cg02057782
cg02057912
cg02057943
cg02058731
cg02059315
cg02059509
cg02059927
cg02060584
cg02063695
cg02063759
cg02066441
cg02066518
cg02067712
cg02069715
cg02069721
cg02070906
cg02071005
cg02073224
cg02073839
cg02076598
cg02077276
cg02077702
cg02078525
cg02078943
cg02081001
cg02081277
cg02086801
cg02087985
cg02090160
cg02090762
cg02092807
cg02093112
cg02093692
cg02093808
cg02099572
cg02100602
cg02103924
cg02104644
cg02105666
cg02106683
cg02106850
cg02108796
cg02109162
cg02109361
cg02110776
cg02114909
cg02114946
cg02115911
cg02117884
cg02118564
cg02119938
cg02120658
cg02120739
cg02124724
cg02124758
cg02124887
cg02124912
cg02127589
cg02128112
cg02129245
cg02129603
cg02130040
cg02132051
cg02133510
cg02137215
cg02138124
cg02141675
cg02142483
cg02145916
cg02147764
cg02150018
cg02151120
cg02154914
cg02156680
cg02161084
cg02162453
cg02164442
cg02165743
cg02167020
cg02167717
cg02168584
cg02170103
cg02170525
cg02171771
cg02171859
cg02173289
cg02174634
cg02176069
cg02177231
cg02177950
cg02178763
cg02181639
cg02182795
cg02184697
cg02187889
cg02188818
cg02191044
cg02191228
cg02192520
cg02192855
cg02193611
cg02195657
cg02197293
cg02197387
cg02203881
cg02205073
cg02206108
cg02210123
cg02211449
cg02212389
cg02213139
cg02215899
cg02216032
cg02216731
cg02217786
cg02219159
cg02221750
cg02223351
cg02224369
cg02227496
cg02228111
cg02228804
cg02229586
cg02230383
cg02231404
cg02232704
cg02232839
cg02238012
cg02239862
cg02239968
cg02240539
cg02243386
cg02244431
cg02244695
cg02245020
cg02245378
cg02247178
cg02247582
cg02249657
cg02249969
cg02250548
cg02250594
cg02250787
cg02251014
cg02251224
cg02252769
cg02253535
cg02254407
cg02257550
cg02258482
cg02258703
cg02260430
cg02260774
cg02262187
cg02263204
cg02263932
cg02264567
cg02266177
cg02266732
cg02271139
cg02274550
cg02275035
cg02275084
cg02278335
cg02278768
cg02279987
cg02283691
cg02284278
cg02286857
cg02287693
cg02287710
cg02288165
cg02288301
cg02288345
cg02290969
cg02291245
cg02293044
cg02293228
cg02293991
cg02296478
cg02297063
cg02297541
cg02297709
cg02300147
cg02304628
cg02305850
cg02306630
cg02308712
cg02311364
cg02312706
cg02314896
cg02315187
cg02316156
cg02316506
cg02318784
cg02319868
cg02320980
cg02321112
cg02322252
cg02322373
cg02322889
cg02325300
cg02326949
cg02328221
cg02328239
cg02329835
cg02330706
cg02331303
cg02332525
cg02332740
cg02333730
cg02335656
cg02338778
cg02339211
cg02339674
cg02342515
cg02343197
cg02343254
cg02344238
cg02344868
cg02345961
cg02347527
cg02349264
cg02351655
cg02352328
cg02354452
cg02356702
cg02360199
cg02361013
cg02361458
cg02364642
cg02367144
cg02369542
cg02370667
cg02372856
cg02375313
cg02376668
cg02378006
cg02378269
cg02379082
cg02379107
cg02380585
cg02380833
cg02381279
cg02382109
cg02384251
cg02386599
cg02391509
cg02391906
cg02392179
cg02392269
cg02393525
cg02393699
cg02393727
cg02394249
cg02395127
cg02395846
cg02397497
cg02400572
cg02401556
cg02403395
cg02404636
cg02409177
cg02410200
cg02410867
cg02411198
cg02415014
cg02415779
cg02416781
cg02417033
cg02417480
cg02420069
cg02421985
cg02423064
cg02424123
cg02427576
cg02428792
cg02430430
cg02430558
cg02430692
cg02432280
cg02432295
cg02432528
cg02433266
cg02434035
cg02434836
cg02436796
cg02438164
cg02441711
cg02442436
cg02442900
cg02443072
cg02445664
cg02447879
cg02448922
cg02449166
cg02451508
cg02451853
cg02453462
cg02455392
cg02455820
cg02456087
cg02456406
cg02456451
cg02457085
cg02457328
cg02458065
cg02458141
cg02461502
cg02462416
cg02462661
cg02464551
cg02467858
cg02467956
cg02471378
cg02473540
cg02473847
cg02474109
cg02478721
cg02479497
cg02479744
cg02479842
cg02480199
cg02481307
cg02481528
cg02482730
cg02484476
cg02485642
cg02486161
cg02487331
cg02489552
cg02489908
cg02493376
cg02497019
cg02498174
cg02501714
cg02501779
cg02501827
cg02502307
cg02503376
cg02503874
cg02505918
cg02506717
cg02506867
cg02506908
cg02508881
cg02509745
cg02510853
cg02512168
cg02512920
cg02515725
cg02517711
cg02519751
cg02520020
cg02520598
cg02523640
cg02524475
cg02527112
cg02527346
cg02529358
cg02529544
cg02530336
cg02531908
cg02532725
cg02533173
cg02534363
cg02537491
cg02539882
cg02540781
cg02540833
cg02541592
cg02544614
cg02545261
cg02547426
cg02549314
cg02553516
cg02553663
cg02554345
cg02554495
cg02555772
cg02555807
cg02557652
cg02560186
cg02563364
cg02565062
cg02565993
cg02566978
cg02569698
cg02570061
cg02570079
cg02570493
cg02571534
cg02571738
cg02571819
cg02573873
cg02574073
cg02574703
cg02575092
cg02575948
cg02577122
cg02577773
cg02578560
cg02579668
cg02582057
cg02582963
cg02586182
cg02586730
cg02588283
cg02589672
cg02590088
cg02595832
cg02596089
cg02596107
cg02596427
cg02596994
cg02597299
cg02598430
cg02600349
cg02600974
cg02601893
cg02603128
cg02604503
cg02604675
cg02604730
cg02607237
cg02607779
cg02611282
cg02614217
cg02616418
cg02619001
cg02619116
cg02621694
cg02625590
cg02626929
cg02627216
cg02630604
cg02633409
cg02633924
cg02634222
cg02634341
cg02637537
cg02638691
cg02642117
cg02643580
cg02644494
cg02645368
cg02646021
cg02648847
cg02649597
cg02649849
cg02651820
cg02652998
cg02654449
cg02656891
cg02657865
cg02658437
cg02658690
cg02659117
cg02659568
cg02660846
cg02662417
cg02663382
cg02665416
cg02670123
cg02670686
cg02671880
cg02674474
cg02676865
cg02677609
cg02681400
cg02681442
cg02682525
cg02685990
cg02687055
cg02689506
cg02691360
cg02697519
cg02699218
cg02700106
cg02700894
cg02701019
cg02702692
cg02704217
cg02705758
cg02705759
cg02706653
cg02708956
cg02710530
cg02710552
cg02711397
cg02711929
cg02712303
cg02714065
cg02715546
cg02715685
cg02718966
cg02719359
cg02719634
cg02721701
cg02721751
cg02721902
cg02723856
cg02724047
cg02724472
cg02726803
cg02728629
cg02729011
cg02730865
cg02731917
cg02732134
cg02732193
cg02734661
cg02735486
cg02736746
[truncated: 15,407 more rows]

## Sheet: EC_mNSvsTE_HYPER-TE
cg00011891
cg00016934
cg00032912
cg00040588
cg00072288
cg00108056
cg00111239
cg00112256
cg00116709
cg00117908
cg00128197
cg00131983
cg00151234
cg00241907
cg00253811
cg00255219
cg00258480
cg00260448
cg00265812
cg00316839
cg00329300
cg00332153
cg00382651
cg00416689
cg00428314
cg00456892
cg00473354
cg00553200
cg00580562
cg00604086
cg00604356
cg00621925
cg00622384
cg00623388
cg00627024
cg00650809
cg00680673
cg00681462
cg00682002
cg00685925
cg00769799
cg00776430
cg00799224
cg00804338
cg00805116
cg00810519
cg00813142
cg00813156
cg00816548
cg00818649
cg00849191
cg00877329
cg00901211
cg00904184
cg00919411
cg00920537
cg00940232
cg00963467
cg00968475
cg00988678
cg01000789
cg01043588
cg01047631
cg01062269
cg01080862
cg01121830
cg01127586
cg01187510
cg01212677
cg01215118
cg01215761
cg01241836
cg01254303
cg01283201
cg01286388
cg01301326
cg01303569
cg01309671
cg01309870
cg01314643
cg01320698
cg01329151
cg01333849
cg01342901
cg01346152
cg01353788
cg01372992
cg01381545
cg01384686
cg01403030
cg01405303
cg01408383
cg01410230
cg01415112
cg01434723
cg01436914
cg01438291
cg01445307
cg01462040
cg01477427
cg01486020
cg01491071
cg01514943
cg01543116
cg01555661
cg01567000
cg01572653
cg01614746
cg01659176
cg01668271
cg01669374
cg01673307
cg01706033
cg01716666
cg01752898
cg01755617
cg01780412
cg01782826
cg01807728
cg01826283
cg01832419
cg01857253
cg01885202
cg01887353
cg01910452
cg01913024
cg01916088
cg01938887
cg01951879
cg02004156
cg02004872
cg02012821
cg02035866
cg02049865
cg02058632
cg02062238
cg02121672
cg02124059
cg02161125
cg02161919
cg02165720
cg02179880
cg02181920
cg02195366
cg02205962
cg02210067
cg02225164
cg02232536
cg02238826
cg02261899
cg02274705
cg02285254
cg02286819
cg02288667
cg02291897
cg02304226
cg02337670
cg02354343
cg02360578
cg02402307
cg02434314
cg02461114
cg02492740
cg02497062
cg02510708
cg02538330
cg02540826
cg02559685
cg02571636
cg02573613
cg02573703
cg02581727
cg02624484
cg02634083
cg02642549
cg02647401
cg02651788
cg02698615
cg02699127
cg02732801
cg02742990
cg02770249
cg02791948
cg02803670
cg02804166
cg02846841
cg02859554
cg02869694
cg02871887
cg02872373
cg02890812
cg02896361
cg02899949
cg02902865
cg02921434
cg02936290
cg02937293
cg02944422
cg02971902
cg02975846
cg03031357
cg03049691
cg03104298
cg03122511
cg03157806
cg03189022
cg03210912
cg03244189
cg03272642
cg03273694
cg03301582
cg03323437
cg03334316
cg03370193
cg03424637
cg03431741
cg03516318
cg03517379
cg03523199
cg03552552
cg03590418
cg03595428
cg03605032
cg03607680
cg03655371
cg03672915
cg03682719
cg03692228
cg03705894
cg03707183
cg03751162
cg03753191
cg03753451
cg03765359
cg03771282
cg03787796
cg03805048
cg03831206
cg03858262
cg03858673
cg03892808
cg03900860
cg03927302
cg03968699
cg03971283
cg03971469
cg03971555
cg03978312
cg03983969
cg03989304
cg03992069
cg03993368
cg03996447
cg04010032
cg04059198
cg04061482
cg04065210
cg04075675
cg04134048
cg04153740
cg04166210
cg04184316
cg04212021
cg04217946
cg04238575
cg04241572
cg04277998
cg04278110
cg04283377
cg04287191
cg04290452
cg04292836
cg04297907
cg04314114
cg04327763
cg04330806
cg04334684
cg04341767
cg04344997
cg04369555
cg04371001
cg04402486
cg04419618
cg04490290
cg04514047
cg04524851
cg04533591
cg04552106
cg04562589
cg04574552
cg04602218
cg04626171
cg04626491
cg04645150
cg04653083
cg04663649
cg04665139
cg04667267
cg04685170
cg04686230
cg04691908
cg04703500
cg04716051
cg04739874
cg04744025
cg04764476
cg04768312
cg04771154
cg04777103
cg04786287
cg04791287
cg04791822
cg04812509
cg04833050
cg04871498
cg04924696
cg04944936
cg04948892
cg04961235
cg04978107
cg05014660
cg05026884
cg05045028
cg05059648
cg05065239
cg05091873
cg05103731
cg05109619
cg05138148
cg05140257
cg05153913
cg05181702
cg05184076
cg05191175
cg05212419
cg05238741
cg05257947
cg05260852
cg05275343
cg05288642
cg05288927
cg05327750
cg05371395
cg05379196
cg05385973
cg05397816
cg05418443
cg05418506
cg05422360
cg05424879
cg05425213
cg05442715
cg05452887
cg05476089
cg05477457
cg05482603
cg05494459
cg05515118
cg05526804
cg05534333
cg05551025
cg05575614
cg05618150
cg05630320
cg05658593
cg05697726
cg05699139
cg05706696
cg05732832
cg05782751
cg05785344
cg05803790
cg05806018
cg05837905
cg05866836
cg05887304
cg05905814
cg05908188
cg05935584
cg05941375
cg05942964
cg05958126
cg05965444
cg05994819
cg06022838
cg06029308
cg06039729
cg06041068
cg06042004
cg06051391
cg06069996
cg06093412
cg06104510
cg06135529
cg06136002
cg06137672
cg06144608
cg06144825
cg06144999
cg06148972
cg06158088
cg06172626
cg06174815
cg06178309
cg06185870
cg06206449
cg06269080
cg06270497
cg06273903
cg06295352
cg06297686
cg06300944
cg06302218
cg06315390
cg06363801
cg06374325
cg06376426
cg06409934
cg06428055
cg06428288
cg06464066
cg06473288
cg06481089
cg06505213
cg06507987
cg06513359
cg06514587
cg06558765
cg06614969
cg06615444
cg06616857
cg06619487
cg06630839
cg06645047
cg06650776
cg06657741
cg06667703
cg06691299
cg06700462
cg06746884
cg06776123
cg06803079
cg06807018
cg06809565
cg06834235
cg06895515
cg06919398
cg06921685
cg06937357
cg06944922
cg06945800
cg06980881
cg07004514
cg07005778
cg07012573
cg07038409
cg07039423
cg07056506
cg07086492
cg07086565
cg07109010
cg07121856
cg07137581
cg07153944
cg07171609
cg07177300
cg07187289
cg07210774
cg07211915
cg07215528
cg07240096
cg07264097
cg07284273
cg07309821
cg07363416
cg07368951
cg07375978
cg07381502
cg07388258
cg07393670
cg07434817
cg07455757
cg07458308
cg07464524
cg07464598
cg07474682
cg07492878
cg07507339
cg07507776
cg07519908
cg07573912
cg07581973
cg07585069
cg07627639
cg07635888
cg07647518
cg07653728
cg07659240
cg07674520
cg07681512
cg07682072
cg07693301
cg07734869
cg07748875
cg07750402
cg07751641
cg07779434
cg07781082
cg07792041
cg07806343
cg07809462
cg07810091
cg07823797
cg07825508
cg07837161
cg07852945
cg07861180
cg07863318
cg07867687
cg07868857
cg07869461
cg07887243
cg07890553
cg07908142
cg07910525
cg07930217
cg07933757
cg07951153
cg07989867
cg07992625
cg08062822
cg08076437
cg08076508
cg08087512
cg08108619
cg08115220
cg08167951
cg08195522
cg08199506
cg08202226
cg08214610
cg08221357
cg08239458
cg08248532
cg08275242
cg08324796
cg08338281
cg08352336
cg08374890
cg08408091
cg08422514
cg08437835
cg08454455
cg08456859
cg08470157
cg08474859
cg08479532
cg08520743
cg08529345
cg08560117
cg08578703
cg08617982
cg08627233
cg08637771
cg08648877
cg08656326
cg08695223
cg08715207
cg08752433
cg08774483
cg08785133
cg08818984
cg08828819
cg08830565
cg08873063
cg08873424
cg08881528
cg08882363
cg08898155
cg08950703
cg08952424
cg08955859
cg08969352
cg08973646
cg08980509
cg08991015
cg08994891
cg08998531
cg09055253
cg09061583
cg09080960
cg09176853
cg09250703
cg09285672
cg09319393
cg09322259
cg09324116
cg09342610
cg09366312
cg09411587
cg09418475
cg09494609
cg09520583
cg09522018
cg09526164
cg09559792
cg09575312
cg09597400
cg09666011
cg09701700
cg09725439
cg09734952
cg09738386
cg09756865
cg09761980
cg09810925
cg09897374
cg09904111
cg09909750
cg09920632
cg09923855
cg09965404
cg09966745
cg09978401
cg09985072
cg09990582
cg09996779
cg09998474
cg10008347
cg10009003
cg10026671
cg10030436
cg10052922
cg10055097
cg10155960
cg10169869
cg10174816
cg10196665
cg10201390
cg10207070
cg10256662
cg10305789
cg10305945
cg10315562
cg10380328
cg10401803
cg10418162
cg10432310
cg10455133
cg10460864
cg10495754
cg10500026
cg10526888
cg10536534
cg10543257
cg10549828
cg10571987
cg10575170
cg10655551
cg10699312
cg10717754
cg10739715
cg10767295
cg10783042
cg10869159
cg10912974
cg10926623
cg10950266
cg10978884
cg10991108
cg10995081
cg11035303
cg11082424
cg11102611
cg11102858
cg11152253
cg11152528
cg11166893
cg11184697
cg11185978
cg11186637
cg11186981
cg11190082
cg11193681
cg11235848
cg11290168
cg11308037
cg11330843
cg11333230
cg11337025
cg11344644
cg11366886
cg11371160
cg11377827
cg11420883
cg11435506
cg11463113
cg11509903
cg11520843
cg11550332
cg11616438
cg11631710
cg11633086
cg11637006
cg11641061
cg11667509
cg11675904
cg11727174
cg11731300
cg11749010
cg11837293
cg11839979
cg11850468
cg11857742
cg11863519
cg11869007
cg11870452
cg11875624
cg11886187
cg11901680
cg11923207
cg12039967
cg12047536
cg12058262
cg12058840
cg12118013
cg12128683
cg12145026
cg12147622
cg12165338
cg12175122
cg12184221
cg12194828
cg12217778
cg12228772
cg12234922
cg12263679
cg12279138
cg12291192
cg12298823
cg12336540
cg12378888
cg12396057
cg12396523
cg12417438
cg12417702
cg12419383
cg12419462
cg12443477
cg12464216
cg12469471
cg12472203
cg12481306
cg12492345
cg12513189
cg12521790
cg12523974
cg12530864
cg12544391
cg12549513
cg12591117
cg12598428
cg12614178
cg12614702
cg12637106
cg12689375
cg12727431
cg12755246
cg12763824
cg12861974
cg12865398
cg12883629
cg12930573
cg12980185
cg12981362
cg13008538
cg13014545
cg13014982
cg13016553
cg13023833
cg13024624
cg13033283
cg13069450
cg13115118
cg13121076
cg13129612
cg13137458
cg13173111
cg13178935
cg13182820
cg13183496
cg13189687
cg13190238
cg13195284
cg13203541
cg13204568
cg13208429
cg13241003
cg13244998
cg13282942
cg13304035
cg13369210
cg13371527
cg13380204
cg13390484
cg13420744
cg13442104
cg13466383
cg13550079
cg13555354
cg13558151
cg13558695
cg13566908
cg13569417
cg13574945
cg13616144
cg13634319
cg13638484
cg13649400
cg13655660
cg13658777
cg13680016
cg13682241
cg13699152
cg13723766
cg13741802
cg13744172
cg13766601
cg13771263
cg13788004
cg13797425
cg13797960
cg13809962
cg13815872
cg13818628
cg13839778
cg13879937
cg13906823
cg13907504
cg13928116
cg13935560
cg13937627
cg13974562
cg14004892
cg14022645
cg14029201
cg14042635
cg14116332
cg14127907
cg14145674
cg14196261
cg14251139
cg14260918
cg14267065
cg14287022
cg14295009
cg14314132
cg14314451
cg14331226
cg14332086
cg14350469
cg14370448
cg14397289
cg14460470
cg14496001
cg14520448
cg14539516
cg14541939
cg14544514
cg14549249
cg14550383
cg14564793
cg14570389
cg14625604
cg14680768
cg14755341
cg14783837
cg14793596
cg14794494
cg14831390
cg14849559
cg14854487
cg14872952
cg14893857
cg14954874
cg14961988
cg14964387
cg14986420
cg14990368
cg15001131
cg15008991
cg15024277
cg15039826
cg15050093
cg15165114
cg15165694
cg15187939
cg15192905
cg15199886
cg15225044
cg15236057
cg15253816
cg15257930
cg15259400
cg15259889
cg15308487
cg15317927
cg15322570
cg15342308
cg15373098
cg15450986
cg15474402
cg15480941
cg15511516
cg15565409
cg15582794
cg15612444
cg15628956
cg15636887
cg15672146
cg15679651
cg15686826
cg15696408
cg15733367
cg15755924
cg15757320
cg15769969
cg15771339
cg15806723
cg15821319
cg15830530
cg15831060
cg15831456
cg15841434
cg15845873
cg15867166
cg15874629
cg15906052
cg15919369
cg15922956
cg15953767
cg15967709
cg15968979
cg16078210
cg16082125
cg16086373
cg16119423
cg16153146
cg16170944
cg16181613
cg16200513
cg16204757
cg16216704
cg16218862
cg16245086
cg16314146
cg16318983
cg16327891
cg16356987
cg16387593
cg16411361
cg16416261
cg16487097
cg16488754
cg16501779
cg16510010
cg16510200
cg16551732
cg16580361
cg16586165
cg16611264
cg16617753
cg16617830
cg16625651
cg16638301
cg16641190
cg16678835
cg16680922
cg16714096
cg16734817
cg16770948
cg16783314
cg16794506
cg16807297
cg16888752
cg16890093
cg16940012
cg16940942
cg16949923
cg16956903
cg16976875
cg16984885
cg17003375
cg17044023
cg17070988
cg17077516
cg17122979
cg17125742
cg17149359
cg17152375
cg17203703
cg17246352
cg17291758
cg17385175
cg17396400
cg17399684
cg17410412
cg17425810
cg17454086
cg17467525
cg17475505
cg17477997
cg17499479
cg17517993
cg17526513
cg17547524
cg17548613
cg17619403
cg17626301
cg17627526
cg17658468
cg17677490
cg17716100
cg17720011
cg17740541
cg17742416
cg17791122
cg17795059
cg17811760
cg17824401
cg17831869
cg17847781
cg17853057
cg17858192
cg17876443
cg17877174
cg17926057
cg17959735
cg17987112
cg18016370
cg18031773
cg18044482
cg18093711
cg18107314
cg18116135
cg18122289
cg18132745
cg18140045
cg18144073
cg18155062
cg18164076
cg18232738
cg18233735
cg18240390
cg18259930
cg18274682
cg18289259
cg18307604
cg18323749
cg18364820
cg18371700
cg18383984
cg18388748
cg18395382
cg18396806
cg18399551
cg18406472
cg18414950
cg18432393
cg18476633
cg18478786
cg18599843
cg18610025
cg18636716
cg18653991
cg18675043
cg18715236
cg18717600
cg18779595
cg18780751
cg18816329
cg18818432
cg18885073
cg18885999
cg18892485
cg18912520
cg18932686
cg18976803
cg18989057
cg18990292
cg19005062
cg19010939
cg19014767
cg19022966
cg19039313
cg19039586
cg19060387
cg19143990
cg19144013
cg19153710
cg19168249
cg19258425
cg19265708
cg19269918
cg19279616
cg19325487
cg19334385
cg19355911
cg19360316
cg19405200
cg19407266
cg19410841
cg19447686
cg19457477
cg19476597
cg19528502
cg19532714
cg19541913
cg19548176
cg19572135
cg19580826
cg19583388
cg19605909
cg19616372
cg19629755
cg19638040
cg19716713
cg19736647
cg19741073
cg19748438
cg19770547
cg19778009
cg19780352
cg19780807
cg19797013
cg19840133
cg19856499
cg19911179
cg19918759
cg19922518
cg19924862
cg19932515
cg19937618
cg19943330
cg19963797
cg20010130
cg20042692
cg20046343
cg20057595
cg20098118
cg20106776
cg20178976
cg20203466
cg20208613
cg20219360
cg20275344
cg20279598
cg20293352
cg20293650
cg20327862
cg20340631
cg20372745
cg20399011
cg20437781
cg20450471
cg20455959
cg20465526
cg20497120
cg20497334
cg20504202
cg20517444
cg20527168
cg20589243
cg20660212
cg20662859
cg20662913
cg20664065
cg20668662
cg20731167
cg20766178
cg20781383
cg20796646
cg20816612
cg20825323
cg20839206
cg20847580
cg20859738
cg20887366
cg20891225
cg20919227
cg20929922
cg20964758
cg20971536
cg20979765
cg21030483
cg21040109
cg21050234
cg21080294
cg21113886
cg21119901
cg21126183
cg21126573
cg21137943
cg21139772
cg21142420
cg21156383
cg21158178
cg21161328
cg21166191
cg21201934
cg21202708
cg21209948
cg21224759
cg21267792
cg21273275
cg21274274
cg21284400
cg21290550
cg21290775
cg21317428
cg21330949
cg21337832
cg21360798
cg21389621
cg21411942
cg21473514
cg21474854
cg21545862
cg21547183
cg21557668
cg21593552
cg21597797
cg21601364
cg21602092
cg21606887
cg21608567
cg21657265
cg21662807
cg21693321
cg21697779
cg21727314
cg21758197
cg21781308
cg21834679
cg21841620
cg21887683
cg21888438
cg21900764
cg21903569
cg21910941
cg21940586
cg21953876
cg21960840
cg21970789
cg21983531
cg21994514
cg22016571
cg22053855
cg22069989
cg22121557
cg22170936
cg22178798
cg22191603
cg22219869
cg22238863
cg22265142
cg22275278
cg22412459
cg22417589
cg22449896
cg22462983
cg22470298
cg22561883
cg22575892
cg22674664
cg22682567
cg22784592
cg22795938
cg22807592
cg22820921
cg22826577
cg22840361
cg22850802
cg22876425
cg22881447
cg22892437
cg22912011
cg22913932
cg22939733
cg22974236
cg22991699
cg23009818
cg23050981
cg23091104
cg23127995
cg23175583
cg23181142
cg23212388
cg23230584
cg23244910
cg23280339
cg23289024
cg23299576
cg23323745
cg23339656
cg23408987
cg23443158
cg23475462
cg23484208
cg23524524
cg23530721
cg23534593
cg23554546
cg23590699
cg23612178
cg23643835
cg23660678
cg23687288
cg23696472
cg23698956
cg23708288
cg23712855
cg23742233
cg23756173
cg23773646
cg23832225
cg23834765
cg23851205
cg23857909
cg23872179
cg23875045
cg23881693
cg23892645
cg23893389
cg23896806
cg23904247
cg23905908
cg23919845
cg23932180
cg23934598
cg23939077
cg23941728
cg23948993
cg23951868
cg23963071
cg23991274
cg24033871
cg24034992
cg24035229
cg24035953
cg24054653
cg24092307
cg24112882
cg24114014
cg24126967
cg24139895
cg24156746
cg24157854
cg24192660
cg24264679
cg24324815
cg24327587
cg24337786
cg24351198
cg24364967
cg24378152
cg24392532
cg24461304
cg24461939
cg24468804
cg24479484
cg24522076
cg24550433
cg24552529
cg24553673
cg24616736
cg24627619
cg24627956
cg24657313
cg24701794
cg24714634
cg24740922
cg24741392
cg24748621
cg24770638
cg24782772
cg24787755
cg24814801
cg24818939
cg24831179
cg24850178
cg24863802
cg24882621
cg24923226
cg24925526
cg24931094
cg24931882
cg24964466
cg25042789
cg25052312
cg25063151
cg25093503
cg25124605
cg25156485
cg25161512
cg25165659
cg25166062
cg25206026
cg25226891
cg25270201
cg25279183
cg25359581
cg25410279
cg25416923
cg25441577
cg25449245
cg25457696
cg25477497
cg25553791
cg25572105
cg25622910
cg25661164
cg25685741
cg25714218
cg25775721
cg25777540
cg25790081
cg25832410
cg25843975
cg25845992
cg25851152
cg25858008
cg25881119
cg25892640
cg25911220
cg25918359
cg25918823
cg25932752
cg25933726
cg25940844
cg25941716
cg25947525
cg26001150
cg26020914
cg26023405
cg26035633
cg26059639
cg26067760
cg26114378
cg26116400
cg26121752
cg26135767
cg26144445
cg26146690
cg26159385
cg26179626
cg26206183
cg26211060
cg26222407
cg26267430
cg26309951
cg26323797
cg26333595
cg26333751
cg26341773
cg26368752
cg26376518
cg26380710
cg26411222
cg26421947
cg26428339
cg26431163
cg26450106
cg26457179
cg26457272
cg26487562
cg26501369
cg26510526
cg26519783
cg26545730
cg26578373
cg26620546
cg26624294
cg26680189
cg26703319
cg26704637
cg26714230
cg26745032
cg26777746
cg26786476
cg26799772
cg26802102
cg26829101
cg26955512
cg26979504
cg27010159
cg27058480
cg27059259
cg27062326
cg27078591
cg27138147
cg27140058
cg27151711
cg27180868
cg27248583
cg27260858
cg27264374
cg27271445
cg27296089
cg27311392
cg27336587
cg27377213
cg27403913
cg27429230
cg27432864
cg27435491
cg27470278
cg27559462
cg27586390
cg27665489

## Sheet: SE_DGvsSS- HYPER-SE_DG
cg00000292
cg00001534
cg00002426
cg00003625
cg00004883
cg00006626
cg00007324
cg00007426
cg00007466
cg00008665
cg00010445
cg00012238
cg00012395
cg00014118
cg00014152
cg00017363
cg00019196
cg00019678
cg00020991
cg00021855
cg00021933
cg00022024
cg00023024
cg00025715
cg00025972
cg00027669
cg00030125
cg00030432
cg00032366
cg00033165
cg00033915
cg00035268
cg00035347
cg00036263
cg00037223
cg00037406
cg00037952
cg00038167
cg00039129
cg00040575
cg00042325
cg00042409
cg00043005
cg00044299
cg00050271
cg00053851
cg00054774
cg00057231
cg00057603
cg00057722
cg00058163
cg00058887
cg00058938
cg00059374
cg00060374
cg00061413
cg00061695
cg00064531
cg00065396
cg00067518
cg00072426
cg00073650
cg00074818
cg00075467
cg00077312
cg00077457
cg00078456
cg00079302
cg00081602
cg00083072
cg00083206
cg00084643
cg00086171
cg00086426
cg00086577
cg00087153
cg00088688
cg00091060
cg00093478
cg00096747
cg00098799
cg00101728
cg00103329
cg00103908
cg00105400
cg00105475
cg00107241
cg00110277
cg00110609
cg00111463
cg00111823
cg00118365
cg00119053
cg00120172
cg00120810
cg00123128
cg00123652
cg00125048
cg00126498
cg00130819
cg00134667
cg00136173
cg00142036
cg00142670
cg00143376
cg00144335
cg00145079
cg00145404
cg00145732
cg00147286
cg00151768
cg00153707
cg00154986
cg00155882
cg00156991
cg00158539
cg00163199
cg00163549
cg00166234
cg00166372
cg00166722
cg00169930
cg00177431
cg00180470
cg00183639
cg00183684
cg00188627
cg00190738
cg00194519
cg00197728
cg00198680
cg00199059
cg00199091
cg00200734
cg00201779
cg00203915
cg00204262
cg00207890
cg00209623
cg00211115
cg00212979
cg00213643
cg00214044
cg00216693
cg00218914
cg00219626
cg00219653
cg00220102
cg00222472
cg00222799
cg00225618
cg00226822
cg00230074
cg00231389
cg00231483
cg00231812
cg00232105
cg00232160
cg00233335
cg00234998
cg00235887
cg00236576
cg00236601
cg00238848
cg00239420
cg00239915
cg00240195
cg00241813
cg00244308
cg00244391
cg00245454
cg00247334
cg00247629
cg00249584
cg00250409
cg00251622
cg00253735
cg00253971
cg00254486
cg00255889
cg00256593
cg00261875
cg00261912
cg00262621
cg00269606
cg00275103
cg00277804
cg00280220
cg00280814
cg00280858
cg00281776
cg00281837
cg00282731
cg00282953
cg00283283
cg00283472
cg00283742
cg00284153
cg00286878
cg00287012
cg00287165
cg00288957
cg00291292
cg00291661
cg00292513
cg00292978
cg00294852
cg00295293
cg00298065
cg00298639
cg00299511
cg00300627
cg00300794
cg00300908
cg00301660
cg00303378
cg00304185
cg00304785
cg00305996
cg00306728
cg00307066
cg00310139
cg00311303
cg00312125
cg00313722
cg00313750
cg00314115
cg00316420
cg00316875
cg00317010
cg00317886
cg00318111
cg00321234
cg00321619
cg00322919
cg00326300
cg00327072
cg00330318
cg00337090
cg00338996
cg00339319
cg00340958
cg00341060
cg00341387
cg00341843
cg00345366
cg00346256
cg00346446
cg00346898
cg00347518
cg00348900
cg00350199
cg00350942
cg00355447
cg00355514
cg00357671
cg00358516
cg00364016
cg00364281
cg00364304
cg00369333
cg00370962
cg00372375
cg00372774
cg00373120
cg00373967
cg00374554
cg00374747
cg00376979
cg00378423
cg00379467
cg00380435
cg00381745
cg00381789
cg00382053
cg00382138
cg00383081
cg00384205
cg00386008
cg00388897
cg00392196
cg00396673
cg00397104
cg00399059
cg00400263
cg00400452
cg00401032
cg00402352
cg00404187
cg00404788
cg00405939
cg00406338
cg00406460
cg00406976
cg00408678
cg00409260
cg00410534
cg00411411
cg00411413
cg00413066
cg00414384
cg00414835
cg00415276
cg00420929
cg00421205
cg00421335
cg00422699
cg00422714
cg00423030
cg00423364
cg00423487
cg00424690
cg00426668
cg00428179
cg00429497
cg00430895
cg00432454
cg00433418
cg00435064
cg00435606
cg00435616
cg00436603
cg00437360
cg00439384
cg00441136
cg00441918
cg00442267
cg00442430
cg00445475
cg00447646
cg00448191
cg00448560
cg00448814
cg00448868
cg00449482
cg00452039
cg00454856
cg00455331
cg00456557
cg00457915
cg00458890
cg00459243
cg00460286
cg00460436
cg00460818
cg00461685
cg00462362
cg00463502
cg00464757
cg00468846
cg00469395
cg00470040
cg00470183
cg00471141
cg00471371
cg00473597
cg00475109
cg00476896
cg00478479
cg00479908
cg00482398
cg00483459
cg00485312
cg00487155
cg00488501
cg00489394
cg00489772
cg00490976
cg00491255
cg00491603
cg00494710
cg00495303
cg00497046
cg00497172
cg00501542
cg00502209
cg00504595
cg00507154
cg00508534
cg00508604
cg00508851
cg00508855
cg00513941
cg00514241
cg00519063
cg00520247
cg00520378
cg00520612
cg00521255
cg00521428
cg00522403
cg00526455
cg00527805
cg00532802
cg00533182
cg00534624
cg00535430
cg00537910
cg00538212
cg00539564
cg00540067
cg00540400
cg00541066
cg00546307
cg00548824
cg00549412
cg00549574
cg00549601
cg00550040
cg00553833
cg00554192
cg00554948
cg00558219
cg00560072
cg00563845
cg00566516
cg00566949
cg00567854
cg00570269
cg00571178
cg00571819
cg00573338
cg00573857
cg00574740
cg00576435
cg00576967
cg00577417
cg00577560
cg00578614
cg00578885
cg00582671
cg00582970
cg00585076
cg00585219
cg00586094
cg00586527
cg00587228
cg00589488
cg00591660
cg00596763
cg00597492
cg00599530
cg00601836
cg00602416
cg00603340
cg00604142
cg00604840
cg00612633
cg00614959
cg00615592
cg00616000
cg00616135
cg00617064
cg00619561
cg00620190
cg00620857
cg00624589
cg00624737
cg00625110
cg00629117
cg00631221
cg00632486
cg00632853
cg00632863
cg00635356
cg00636737
cg00638020
cg00638945
cg00642501
cg00644351
cg00644847
cg00652332
cg00654637
cg00655706
cg00658411
cg00663396
cg00663575
cg00665405
cg00665816
cg00672147
cg00672802
cg00673189
cg00673685
cg00675721
cg00676394
cg00677574
cg00678286
cg00678938
cg00679383
cg00679681
cg00680696
cg00682096
cg00684594
cg00685480
cg00688323
cg00691729
cg00692774
cg00693599
cg00694520
cg00696763
cg00697057
cg00700487
cg00700638
cg00701946
cg00702148
cg00707741
cg00712409
cg00713400
cg00714115
cg00716579
cg00718261
cg00718400
cg00718418
cg00720845
cg00724728
cg00724839
cg00727310
cg00729875
cg00729885
cg00730857
cg00731874
cg00732970
cg00733190
cg00734567
cg00736299
cg00737208
cg00737979
cg00740721
cg00741410
cg00743269
cg00745046
cg00749672
cg00750518
cg00753399
cg00754253
cg00754896
cg00755561
cg00756338
cg00756648
cg00759420
cg00762185
cg00762662
cg00764369
cg00765635
cg00767000
cg00767010
cg00767042
cg00769818
cg00769843
cg00769882
cg00779166
cg00779638
cg00782645
cg00782839
cg00784654
cg00785877
cg00786761
cg00788063
cg00789427
cg00790916
cg00792053
cg00793719
cg00793990
cg00794911
cg00794963
cg00796569
cg00796963
cg00800780
cg00800809
cg00801514
cg00802484
cg00804210
cg00804934
cg00806056
cg00806138
cg00809820
cg00812799
cg00814239
cg00814580
cg00814780
cg00815230
cg00815325
cg00815658
cg00817731
cg00819338
cg00821604
cg00823110
cg00827893
cg00828709
cg00831222
cg00835825
cg00836940
cg00837398
cg00841001
cg00842076
cg00842549
cg00844821
cg00845883
cg00846036
cg00846968
cg00849267
cg00851732
cg00852414
cg00853853
cg00855731
cg00856580
cg00856997
cg00857137
cg00858483
cg00859314
cg00859655
cg00863661
cg00866500
cg00867901
cg00871207
cg00871215
cg00872270
cg00872695
cg00873919
cg00875636
cg00875849
cg00876681
cg00877321
cg00878163
cg00879218
cg00880562
cg00880872
cg00886770
cg00886780
cg00891125
cg00891761
cg00892742
cg00893603
cg00896043
cg00898447
cg00898986
cg00900231
cg00901198
cg00901554
cg00901675
cg00901687
cg00906762
cg00907505
cg00912149
cg00912164
cg00913283
cg00914963
cg00918738
cg00919055
cg00922301
cg00922310
cg00923880
cg00925802
cg00925831
cg00926894
cg00927594
cg00927699
cg00928191
cg00928816
cg00929465
cg00931339
cg00931874
cg00932612
cg00934355
cg00935504
cg00935887
cg00936626
cg00938816
cg00938819
cg00939432
cg00939649
cg00941576
cg00942918
cg00943384
cg00945260
cg00946187
cg00946479
cg00946921
cg00948664
cg00949532
cg00949980
cg00950244
cg00951879
cg00953006
cg00953825
cg00954833
cg00954875
cg00955035
cg00958651
cg00961252
cg00961616
cg00963786
cg00965133
cg00965168
cg00969323
cg00969446
cg00971737
cg00974629
cg00976381
cg00977696
cg00978102
cg00978855
cg00981070
cg00984540
cg00987379
cg00990020
cg00990874
cg00993308
cg00993677
cg00993881
cg00994307
cg00995582
cg00998135
cg01002242
cg01002622
cg01003599
cg01007458
cg01010285
cg01012394
cg01013054
cg01013317
cg01014029
cg01015245
cg01015662
cg01016592
cg01017926
cg01021742
cg01022219
cg01022250
cg01025774
cg01025800
cg01025894
cg01026796
cg01028223
cg01028379
cg01028796
cg01029592
cg01029669
cg01030213
cg01030476
cg01031251
cg01032119
cg01032398
cg01032650
cg01033001
cg01034754
cg01035640
cg01035826
cg01035931
cg01039355
cg01039763
cg01040434
cg01042334
cg01043076
cg01043616
cg01046951
cg01048195
cg01048561
cg01049674
cg01054110
cg01054282
cg01057705
cg01060989
cg01061714
cg01062126
cg01062504
cg01062849
cg01065586
cg01065697
cg01066220
cg01067216
cg01068823
cg01069141
cg01071153
cg01071367
cg01075918
cg01078174
cg01079515
cg01079738
cg01080552
cg01080902
cg01080924
cg01081263
cg01082057
cg01082091
cg01084566
cg01088863
cg01089516
cg01090026
cg01090609
cg01090686
cg01095837
cg01098142
cg01100521
cg01101873
cg01106114
cg01108921
cg01109227
cg01110312
cg01111093
cg01115569
cg01117549
cg01119278
cg01119585
cg01119718
cg01120132
cg01123965
cg01127320
cg01128736
cg01132443
cg01132502
cg01132893
cg01134139
cg01134643
cg01136335
cg01137047
cg01139880
cg01141459
cg01141838
cg01142066
cg01142302
cg01145903
cg01153451
cg01153834
cg01155039
cg01156012
cg01158679
cg01163369
cg01164291
cg01167177
cg01168339
cg01168890
cg01169396
cg01171339
cg01171786
cg01172872
cg01173474
cg01174240
cg01175767
cg01176433
cg01176782
cg01178624
cg01180479
cg01181307
cg01181499
cg01182620
cg01184149
cg01184449
cg01187496
cg01189606
cg01189982
cg01191566
cg01192077
cg01192869
cg01192875
cg01195404
cg01198111
cg01199494
cg01199618
cg01200104
cg01200376
cg01200585
cg01201215
cg01201399
cg01202519
cg01203651
cg01205019
cg01205058
cg01206970
cg01208614
cg01214061
cg01214155
cg01214458
cg01214587
cg01217601
cg01218148
cg01220192
cg01221157
cg01223336
cg01224715
cg01230325
cg01231921
cg01232138
cg01232511
cg01234299
cg01234610
cg01237677
cg01238343
cg01239651
cg01239735
cg01239928
cg01241390
cg01242451
cg01242872
cg01242977
cg01243513
cg01244775
cg01244934
cg01245155
cg01245721
cg01246665
cg01248855
cg01250490
cg01252496
cg01253386
cg01256165
cg01256227
cg01256846
cg01259104
cg01259126
cg01259220
cg01259891
cg01260820
cg01262217
cg01263574
cg01263877
cg01264539
cg01266853
cg01270709
cg01274233
cg01275934
cg01276845
cg01277438
cg01278720
cg01280366
cg01281904
cg01284033
cg01284415
cg01285926
cg01286685
cg01287000
cg01287037
cg01287476
cg01288904
cg01289103
cg01289343
cg01289769
cg01289861
cg01290153
cg01290565
cg01291665
cg01294431
cg01295188
cg01297370
cg01297744
cg01298000
cg01298991
cg01300096
cg01300914
cg01301660
cg01302119
cg01302593
cg01304027
cg01306563
cg01307115
cg01308419
cg01309141
cg01310365
cg01310397
cg01314574
cg01314743
cg01315092
cg01317569
cg01319471
cg01319892
cg01320298
cg01321174
cg01323381
cg01324550
cg01325116
cg01326942
cg01327147
cg01327767
cg01328500
cg01335785
cg01336162
cg01336552
cg01336862
cg01338043
cg01342115
cg01343041
cg01343363
cg01344797
cg01346767
cg01349489
cg01350728
cg01350934
cg01353907
cg01355108
cg01355753
cg01355876
cg01357771
cg01359999
cg01360119
cg01360281
cg01361555
cg01366338
cg01367322
cg01368488
cg01369689
cg01370241
cg01375262
cg01376763
cg01378158
cg01379009
cg01380361
cg01380634
cg01381795
cg01382860
cg01383082
cg01383287
cg01385052
cg01387797
cg01388889
cg01390039
cg01390419
cg01394884
cg01395667
cg01396774
cg01399485
cg01399860
cg01400468
cg01400884
cg01401641
cg01403655
cg01407254
cg01407927
cg01410314
cg01410740
cg01413268
cg01416295
cg01417692
cg01419713
cg01420159
cg01421548
cg01423389
cg01423643
cg01425021
cg01426041
cg01426713
cg01426743
cg01427142
cg01428953
cg01430385
cg01430588
cg01431184
cg01434025
cg01435564
cg01435791
cg01437235
cg01437781
cg01437917
cg01439568
cg01439670
cg01440556
cg01443946
cg01444487
cg01444801
cg01445240
cg01445659
cg01446287
cg01447748
cg01448562
cg01452110
cg01452115
cg01453111
cg01453814
cg01458088
cg01458510
cg01464748
cg01466133
cg01468220
cg01469284
cg01470704
cg01472113
cg01475377
cg01475649
cg01476969
cg01477015
cg01477326
cg01479473
cg01481690
cg01481976
cg01485067
cg01485548
cg01487386
cg01487910
cg01488679
cg01491398
cg01494339
cg01495363
cg01495379
cg01499623
cg01500733
cg01501018
cg01501264
cg01501491
cg01503706
cg01503938
cg01504212
cg01504718
cg01504784
cg01508548
cg01509715
cg01510051
cg01511567
cg01512854
cg01515136
cg01515960
cg01518138
cg01518723
cg01518846
cg01522083
cg01527407
cg01528913
cg01529207
cg01531431
cg01532075
cg01533397
cg01538305
cg01538605
cg01544405
cg01544777
cg01546047
cg01546472
cg01546820
cg01550017
cg01550445
cg01552731
cg01555764
cg01556706
cg01559302
cg01561259
cg01561869
cg01562356
cg01563465
cg01563671
cg01565918
cg01566170
cg01566552
cg01569660
cg01569664
cg01570480
cg01572513
cg01573501
cg01575836
cg01577029
cg01577745
cg01580782
cg01581111
cg01581360
cg01582947
cg01583915
cg01586208
cg01586432
cg01586952
cg01594262
cg01594949
cg01596520
cg01596834
cg01596963
cg01596995
cg01597480
cg01599094
cg01599742
cg01601760
cg01601926
cg01602287
cg01603559
cg01603733
cg01604994
cg01608477
cg01610915
cg01611679
cg01612037
cg01612247
cg01612285
cg01613406
cg01613691
cg01616529
cg01617211
cg01617280
cg01617990
cg01618287
cg01620082
cg01621764
cg01622018
cg01622304
cg01623261
cg01624637
cg01626707
cg01628053
cg01629722
cg01630925
cg01632240
cg01634213
cg01638225
cg01641620
cg01641930
cg01643250
cg01645806
cg01647314
cg01649879
cg01651290
cg01651710
cg01654560
cg01654770
cg01655356
cg01655667
cg01656996
cg01662869
cg01664382
cg01667007
cg01667185
cg01669366
cg01669732
cg01670771
cg01677623
cg01678084
cg01678833
cg01683215
cg01687558
cg01687997
cg01693305
cg01693350
cg01696984
cg01698632
cg01699298
cg01702513
cg01707330
cg01707361
cg01707976
cg01708014
cg01708427
cg01709189
cg01710852
cg01711322
cg01713272
cg01713311
cg01716419
cg01719663
cg01721410
cg01722584
cg01724917
cg01725864
cg01725872
cg01726393
cg01727431
cg01727686
cg01729262
cg01729837
cg01730148
cg01734628
cg01738202
cg01741924
cg01744412
cg01746241
cg01747664
cg01748193
cg01749467
cg01749500
cg01749651
cg01750170
cg01750654
cg01750783
cg01755100
cg01756421
cg01756799
cg01757586
cg01759155
cg01760090
cg01761236
cg01765416
cg01766193
cg01768001
cg01768131
cg01769392
cg01771096
cg01771416
cg01773515
cg01773927
cg01774093
cg01775612
cg01780171
cg01781018
cg01781617
cg01781850
cg01784220
cg01786048
cg01786585
cg01786967
cg01787798
cg01787944
cg01789463
cg01794929
cg01795964
cg01796075
cg01796511
cg01797169
cg01798419
cg01798661
cg01798813
cg01799734
cg01799818
cg01800146
cg01802295
cg01802713
cg01806181
cg01807241
cg01807688
cg01807735
cg01808762
cg01810926
cg01814364
cg01814731
cg01816191
cg01817364
cg01822785
cg01823275
cg01824138
cg01824517
cg01826728
cg01827781
cg01828530
cg01829926
cg01830463
cg01830726
cg01831160
cg01831657
cg01832325
cg01832802
cg01834160
cg01835384
cg01836096
cg01836137
cg01836455
cg01837364
cg01838004
cg01838863
cg01840333
cg01843272
cg01844176
cg01848372
cg01850202
cg01850541
cg01850889
cg01852543
cg01853216
cg01854076
cg01854491
cg01855613
cg01857704
cg01859312
cg01859360
cg01859616
cg01860271
cg01860693
cg01860821
cg01861555
cg01861913
cg01862688
cg01863042
cg01864230
cg01864564
cg01865484
cg01865609
cg01865721
cg01869360
cg01869548
cg01871581
cg01873305
cg01876338
cg01876670
cg01879039
cg01880569
cg01881265
cg01881464
cg01882260
cg01882566
cg01883966
cg01888601
cg01890435
cg01890858
cg01894846
cg01895439
cg01897036
cg01901022
cg01901466
cg01904812
cg01905210
cg01905773
cg01906944
cg01906946
cg01908551
cg01909242
cg01909621
cg01911191
cg01912298
cg01914314
cg01916237
cg01916685
cg01916743
cg01919701
cg01922516
cg01924435
cg01924493
cg01924715
cg01928553
cg01930518
cg01933073
cg01934408
cg01934638
cg01936942
cg01937247
cg01938422
cg01940055
cg01940181
cg01940490
cg01941586
cg01943414
cg01944226
cg01947751
cg01948275
cg01949002
cg01953615
cg01954649
cg01957150
cg01959838
cg01962414
cg01963297
cg01964856
cg01965047
cg01966129
cg01966791
cg01966922
cg01967580
cg01967642
cg01969115
cg01970040
cg01970325
cg01970383
cg01970716
cg01971224
cg01972576
cg01972979
cg01973394
cg01973920
cg01974027
cg01974091
cg01976810
cg01977762
cg01978246
cg01983248
cg01984743
cg01984854
cg01985186
cg01985396
cg01985833
cg01987536
cg01987962
cg01989521
cg01991514
cg01992280
cg01992512
cg01993478
cg01993552
cg01995067
cg01995145
cg01995289
cg01995393
cg02000808
cg02001694
cg02002684
cg02006610
cg02008285
cg02008416
cg02012242
cg02016195
cg02017814
cg02018681
cg02021641
cg02026498
cg02026801
cg02028524
cg02028663
cg02032841
cg02034168
cg02036364
cg02037794
cg02039234
cg02039634
cg02039839
cg02042156
cg02043000
cg02043219
cg02044612
cg02045451
cg02046665
cg02047547
cg02048657
cg02049404
cg02050426
cg02052797
cg02053678
cg02054493
cg02055353
cg02056986
cg02057501
cg02057561
cg02059080
cg02059813
cg02061804
cg02062466
cg02064284
cg02066144
cg02068015
cg02069524
cg02069674
cg02071172
cg02071463
cg02073081
cg02073525
cg02074191
cg02074956
cg02076378
cg02076624
cg02078844
cg02079122
cg02079741
cg02082462
cg02083080
cg02084948
cg02085119
cg02085660
cg02085794
cg02085953
cg02086046
cg02086866
cg02087005
cg02087067
cg02087454
cg02092295
cg02094273
cg02094827
cg02094983
cg02095605
cg02096229
cg02098273
cg02100410
cg02101892
cg02102075
cg02102533
cg02102684
cg02103401
cg02106072
cg02107842
cg02109073
cg02110529
cg02111951
cg02112229
cg02114696
cg02114909
cg02114946
cg02115117
cg02116225
cg02116768
cg02117656
cg02119755
cg02119837
cg02123734
cg02126477
cg02133098
cg02133324
cg02133624
cg02136201
cg02136590
cg02139338
cg02139853
cg02141543
cg02143404
cg02144030
cg02144874
cg02146026
cg02147681
cg02150218
cg02152351
cg02152399
cg02158199
cg02158755
cg02160627
cg02161292
cg02168584
cg02172669
cg02172891
cg02180915
cg02182272
cg02182754
cg02185216
cg02185402
cg02186277
cg02188515
cg02189483
cg02189760
cg02190211
cg02192974
cg02194396
cg02194684
cg02198617
cg02204442
cg02204637
cg02206980
cg02208657
cg02208848
cg02212772
cg02214783
cg02215611
cg02218200
cg02218506
cg02218884
cg02219026
cg02219116
cg02219878
cg02220125
cg02222844
cg02223028
cg02225346
cg02225520
cg02228913
cg02230383
cg02232284
cg02237755
cg02238362
cg02239163
cg02241145
cg02243061
cg02246427
cg02249732
cg02251349
cg02253236
cg02254181
cg02254574
cg02254885
cg02264079
cg02266849
cg02267838
cg02267992
cg02268013
cg02268370
cg02270952
cg02271687
cg02272489
cg02274728
cg02275418
cg02276822
cg02278728
cg02278912
cg02280038
cg02280132
cg02283238
cg02283487
cg02285386
cg02286665
cg02286761
cg02287817
cg02289287
cg02291439
cg02292206
cg02294312
cg02296171
cg02296564
cg02298401
cg02299020
cg02301319
cg02303651
cg02303933
cg02303941
cg02306936
cg02307597
cg02309594
cg02310421
cg02311337
cg02313554
cg02313829
cg02318535
cg02319016
cg02319392
cg02319549
cg02319972
cg02324006
cg02327604
cg02329430
cg02330106
cg02330214
cg02331025
cg02331812
cg02334775
cg02337388
cg02337614
cg02338538
cg02339211
cg02344113
cg02344636
cg02345317
cg02346282
cg02347904
cg02348437
cg02348462
cg02351745
cg02351804
cg02352370
cg02356435
cg02356993
cg02357046
cg02358323
cg02359160
cg02360175
cg02360445
cg02362984
cg02363677
cg02365397
cg02365945
cg02368508
cg02368587
cg02371119
cg02372820
cg02373627
cg02375503
cg02376097
cg02376426
cg02377915
cg02380750
cg02381468
cg02382037
cg02382400
cg02382532
cg02383285
cg02385173
cg02385820
cg02388253
cg02388416
cg02389682
cg02390447
cg02393756
cg02394395
cg02395779
cg02396005
cg02401589
cg02402368
cg02402946
cg02404507
cg02404974
cg02406484
cg02407048
cg02407068
cg02407762
cg02413092
cg02414468
cg02414889
cg02416986
cg02417264
cg02419321
cg02420617
cg02424007
cg02424103
cg02427200
cg02427468
cg02428178
cg02430039
cg02431687
cg02432487
cg02436605
cg02436616
cg02438545
cg02439266
cg02439789
cg02448244
cg02452552
cg02454815
cg02455346
cg02455703
cg02455827
cg02458062
cg02459827
cg02460935
cg02462868
cg02463440
cg02464608
cg02466349
cg02470287
cg02471028
cg02471578
cg02474116
cg02476374
cg02478793
cg02478829
cg02481528
cg02481918
cg02482001
cg02483204
cg02483701
cg02485328
cg02488299
cg02490460
cg02492170
cg02492835
cg02492873
cg02493798
cg02494593
cg02495057
cg02495569
cg02497584
cg02497830
cg02498422
cg02499281
cg02499453
cg02499669
cg02500042
cg02501418
cg02504902
cg02506248
cg02506501
cg02506867
cg02509027
cg02512108
cg02516288
cg02516696
cg02517215
cg02517337
cg02517528
cg02517686
cg02524112
cg02524205
cg02524725
cg02525719
cg02525826
cg02526277
cg02532017
cg02532293
cg02534048
cg02534659
cg02537091
cg02538783
cg02540440
cg02541210
cg02542103
cg02542218
cg02543796
cg02544002
cg02546490
cg02547263
cg02548777
cg02549834
cg02554564
cg02554712
cg02556430
cg02556855
cg02557934
cg02562761
cg02563906
cg02564313
cg02565147
cg02566861
cg02567769
cg02568531
cg02569115
cg02569554
cg02570888
cg02571819
cg02571857
cg02573587
cg02573703
cg02575092
cg02575675
cg02575937
cg02576528
cg02577387
cg02578709
cg02578944
cg02579469
cg02580917
cg02580923
cg02582520
cg02582940
cg02583796
cg02586198
cg02593305
cg02593507
cg02593924
cg02595823
cg02596508
cg02601489
cg02604095
cg02607130
cg02607319
cg02610070
cg02611507
cg02611770
cg02613286
cg02614016
cg02614657
cg02615582
cg02617702
cg02618550
cg02618733
cg02619656
cg02625222
cg02625638
cg02627227
cg02627599
cg02632227
cg02632643
cg02635592
cg02635932
cg02637101
cg02637838
cg02638589
cg02639181
cg02639793
cg02642949
cg02643589
cg02646480
cg02649063
cg02649698
cg02650323
cg02652072
cg02657823
cg02658272
cg02665578
cg02665650
cg02665727
cg02666566
cg02666638
cg02668405
cg02672759
cg02673986
cg02675859
cg02677192
cg02677388
cg02683114
cg02689640
cg02691264
cg02693033
cg02693870
cg02695628
cg02696201
cg02696327
cg02696685
cg02698576
cg02699915
cg02703145
cg02704667
cg02707307
cg02710090
cg02710163
cg02710346
cg02710481
cg02710553
cg02711212
cg02712165
cg02715006
cg02717454
cg02717866
cg02720091
cg02725334
cg02725485
cg02726930
cg02727079
cg02727423
cg02730492
cg02737321
cg02739437
cg02739593
cg02741548
cg02743632
cg02744937
cg02746340
cg02746781
cg02747822
cg02749784
cg02749843
cg02751838
cg02754470
cg02756176
cg02756845
cg02756856
cg02757609
cg02757970
cg02758247
cg02758987
cg02760293
cg02761733
cg02763002
cg02764093
cg02764188
cg02768694
cg02770252
cg02772823
cg02773436
cg02776313
cg02776514
[truncated: 13,340 more rows]

## Sheet: SE_DGvsSS- HYPER-SS
cg00003287
cg00011924
cg00016913
cg00022688
cg00025357
cg00027570
cg00028429
cg00047694
cg00049883
cg00052578
cg00068038
cg00068621
cg00073460
cg00081827
cg00083659
cg00089821
cg00095326
cg00096328
cg00114478
cg00115458
cg00119811
cg00122779
cg00133624
cg00154902
cg00157012
cg00159243
cg00160302
cg00164941
cg00174718
cg00184457
cg00193521
cg00198594
cg00200755
cg00212786
cg00237391
cg00239835
cg00240378
cg00242950
cg00245850
cg00252472
cg00287122
cg00288376
cg00290033
cg00296578
cg00308914
cg00316485
cg00319774
cg00320539
cg00326836
cg00326842
cg00335908
cg00365692
cg00366412
cg00378473
cg00395632
cg00397859
cg00403478
cg00422474
cg00428457
cg00436051
cg00447110
cg00455386
cg00459447
cg00495713
cg00502926
cg00520441
cg00522451
cg00526163
cg00539347
cg00543073
cg00547304
cg00568550
cg00571041
cg00579105
cg00587472
cg00594854
cg00602295
cg00610577
cg00619207
cg00627798
cg00661947
cg00664117
cg00664697
cg00673208
cg00676711
cg00689225
cg00698332
cg00700039
cg00700324
cg00712181
cg00713925
cg00728317
cg00729699
cg00733786
cg00751021
cg00768359
cg00807235
cg00813993
cg00816880
cg00834924
cg00839873
cg00863099
cg00868652
cg00872677
cg00888252
cg00889709
cg00893522
cg00898111
cg00901138
cg00911370
cg00924144
cg00929878
cg00943851
cg00965578
cg00973286
cg00990740
cg00992348
cg01006193
cg01015401
cg01028364
cg01037082
cg01040850
cg01059398
cg01093934
cg01099512
cg01113435
cg01113488
cg01130157
cg01143145
cg01143454
cg01146808
cg01152624
cg01175610
cg01179268
cg01181233
cg01190484
cg01224949
cg01226963
cg01228136
cg01232969
cg01242676
cg01246622
cg01280881
cg01284289
cg01299925
cg01306161
cg01337940
cg01350993
cg01364935
cg01379730
cg01395041
cg01409343
cg01415456
cg01420492
cg01427567
cg01445151
cg01452777
cg01454538
cg01455456
cg01466491
cg01502116
cg01505676
cg01515802
cg01534572
cg01537445
cg01546430
cg01552173
cg01558960
cg01569709
cg01578324
cg01586045
cg01611622
cg01613294
cg01613817
cg01627252
cg01635346
cg01644640
cg01644702
cg01649456
cg01663768
cg01701634
cg01720616
cg01755505
cg01759218
cg01761256
cg01765152
cg01765322
cg01774131
cg01780352
cg01786360
cg01793320
cg01796493
cg01806427
cg01813965
cg01818776
cg01831454
cg01832662
cg01833689
cg01855070
cg01870681
cg01882933
cg01891711
cg01891736
cg01893068
cg01932691
cg01937669
cg01950074
cg01951963
cg01955153
cg01956154
cg01959050
cg01965939
cg01987353
cg01987702
cg01990910
cg02001779
cg02016764
cg02043679
cg02046668
cg02052265
cg02054358
cg02055889
cg02059317
cg02060851
cg02065293
cg02073887
cg02085016
cg02091781
cg02099418
cg02104162
cg02140020
cg02142926
cg02164615
cg02174765
cg02177648
cg02184010
cg02196834
cg02201914
cg02202664
cg02212491
cg02219607
cg02225720
cg02238178
cg02243522
cg02246928
cg02261047
cg02264862
cg02269083
cg02273392
cg02273922
cg02284014
cg02290880
cg02291556
cg02295992
cg02309301
cg02330874
cg02340056
cg02352281
cg02353048
cg02366772
cg02371798
cg02381385
cg02383160
cg02384859
cg02395441
cg02398482
cg02400474
cg02402091
cg02402706
cg02402843
cg02403502
cg02404349
cg02424654
cg02452500
cg02465761
cg02466588
cg02470871
cg02473953
cg02487239
cg02488338
cg02494781
cg02501086
cg02511845
cg02517489
cg02524983
cg02537960
cg02543772
cg02554168
cg02556345
cg02565255
cg02570527
cg02574464
cg02583620
cg02584760
cg02585849
cg02589576
cg02589899
cg02600622
cg02609279
cg02627991
cg02677286
cg02695074
cg02697373
cg02700346
cg02710168
cg02716614
cg02752802
cg02759531
cg02773433
cg02776627
cg02779592
cg02782634
cg02787737
cg02790471
cg02816367
cg02818910
cg02821150
cg02828397
cg02836769
cg02861056
cg02870147
cg02875788
cg02880380
cg02886509
cg02898493
cg02905744
cg02919168
cg02919564
cg02926266
cg02927327
cg02929431
cg02936740
cg02943456
cg02947862
cg02966841
cg02968094
cg02983090
cg02988698
cg03001012
cg03009030
cg03017195
cg03024212
cg03029090
cg03048432
cg03049445
cg03050022
cg03053427
cg03055492
cg03067613
cg03079818
cg03093786
cg03096543
cg03097190
cg03119532
cg03140135
cg03146503
cg03163302
cg03163448
cg03188000
cg03196364
cg03198733
cg03199366
cg03211283
cg03218909
cg03222834
cg03223172
cg03224621
cg03226666
cg03245590
cg03252313
cg03271293
cg03271650
cg03275375
cg03278514
cg03281572
cg03290977
cg03293732
cg03307177
cg03310376
cg03311274
cg03312703
cg03314315
cg03315456
cg03348792
cg03355690
cg03370951
cg03373714
cg03393105
cg03414202
cg03430633
cg03434384
cg03460239
cg03463994
cg03464224
cg03467825
cg03476673
cg03490881
cg03496473
cg03498081
cg03505225
cg03505654
cg03511806
cg03526142
cg03536289
cg03550864
cg03559008
cg03561745
cg03575939
cg03584788
cg03602500
cg03623401
cg03649855
cg03660096
cg03665259
cg03706951
cg03728806
cg03744332
cg03746133
cg03760919
cg03781098
cg03792788
cg03796381
cg03837909
cg03840259
cg03844372
cg03848483
cg03852144
cg03875496
cg03887528
cg03889507
cg03901532
cg03915559
cg03928874
cg03930857
cg03938978
cg03986665
cg03989068
cg04002454
cg04005701
cg04007531
cg04039177
cg04039799
cg04041283
cg04041976
cg04043455
cg04097334
cg04098585
cg04103377
cg04124586
cg04131610
cg04131890
cg04134958
cg04145477
cg04156900
cg04163967
cg04168675
cg04173852
cg04184716
cg04185542
cg04210254
cg04214459
cg04214573
cg04228042
cg04229930
cg04241863
cg04244985
cg04259504
cg04264075
cg04271791
cg04275695
cg04292976
cg04305319
cg04311653
cg04312209
cg04329478
cg04329510
cg04331525
cg04336859
cg04345034
cg04347293
cg04349084
cg04357390
cg04365699
cg04368971
cg04396421
cg04398282
cg04406863
cg04407317
cg04423493
cg04441857
cg04454050
cg04486886
cg04493432
cg04499514
cg04505076
cg04516203
cg04519775
cg04530028
cg04544858
cg04569364
cg04572258
cg04573500
cg04599946
cg04602747
cg04622200
cg04625536
cg04631809
cg04636564
cg04642300
cg04652282
cg04655662
cg04657325
cg04658027
cg04661040
cg04663842
cg04664309
cg04674201
cg04676715
cg04680209
cg04681489
cg04689582
cg04697265
cg04709971
cg04710768
cg04721934
cg04742550
cg04753163
cg04755345
cg04756287
cg04773529
cg04781494
cg04786142
cg04791747
cg04795700
cg04845060
cg04872689
cg04877910
cg04880751
cg04881622
cg04895345
cg04924511
cg04927540
cg04932928
cg04949981
cg04953015
cg04961225
cg04976254
cg04976479
cg04978343
cg04998379
cg05002041
cg05033239
cg05039749
cg05043774
cg05057534
cg05061296
cg05076730
cg05083033
cg05083358
cg05091653
cg05094429
cg05111829
cg05117638
cg05130482
cg05136724
cg05160558
cg05170706
cg05177590
cg05177851
cg05180121
cg05184016
cg05194864
cg05205532
cg05212349
cg05267204
cg05270551
cg05289394
cg05307752
cg05312305
cg05359237
cg05366160
cg05374809
cg05386482
cg05403316
cg05419581
cg05421487
cg05433391
cg05445137
cg05447916
cg05451359
cg05479627
cg05492904
cg05493841
cg05498047
cg05502376
cg05513208
cg05521150
cg05524246
cg05533119
cg05539265
cg05541311
cg05544095
cg05547778
cg05570258
cg05570806
cg05583848
cg05589784
cg05598678
cg05607401
cg05607461
cg05607502
cg05616999
cg05627398
cg05639246
cg05640992
cg05645904
cg05656364
cg05670596
cg05671385
cg05710982
cg05712271
cg05716242
cg05722872
cg05746403
cg05750824
cg05783290
cg05787038
cg05793409
cg05814654
cg05817765
cg05826596
cg05835265
cg05844827
cg05849566
cg05852732
cg05861512
cg05868564
cg05869699
cg05874148
cg05875421
cg05876824
cg05884870
cg05885012
cg05886367
cg05897030
cg05901852
cg05902130
cg05906144
cg05911153
cg05915362
cg05937687
cg05951609
cg05955251
cg05984948
cg05985522
cg05995496
cg06024099
cg06041695
cg06042148
cg06060835
cg06083525
cg06085204
cg06104914
cg06112171
cg06124975
cg06127263
cg06141025
cg06144905
cg06155710
cg06162872
cg06178383
cg06183267
cg06190244
cg06200607
cg06208382
cg06216640
cg06225154
cg06230513
cg06238491
cg06255020
cg06277728
cg06282952
cg06297863
cg06363129
cg06370133
cg06370862
cg06372467
cg06375062
cg06379876
cg06385583
cg06398236
cg06474225
cg06486093
cg06551177
cg06551476
cg06552160
cg06558435
cg06558622
cg06610548
cg06613286
cg06624525
cg06627354
cg06632214
cg06636678
cg06640279
cg06676587
cg06687504
cg06694826
cg06699216
cg06699555
cg06710735
cg06719604
cg06723337
cg06727338
cg06733903
cg06741568
cg06758448
cg06762176
cg06762457
cg06764387
cg06766450
cg06774893
cg06775361
cg06778183
cg06786153
cg06787487
cg06792975
cg06794001
cg06800840
cg06820302
cg06825878
cg06834431
cg06837981
cg06853894
cg06871123
cg06892679
cg06926300
cg06937491
cg06941836
cg06946543
cg06952798
cg06961237
cg06963182
cg06972043
cg06974428
cg06978067
cg06983551
cg06986263
cg06993099
cg07020832
cg07025274
cg07026259
cg07040303
cg07042170
cg07048828
cg07054804
cg07063068
cg07074390
cg07074575
cg07077221
cg07080231
cg07095945
cg07106794
cg07122905
cg07133629
cg07144408
cg07145255
cg07150145
cg07177395
cg07181395
cg07182248
cg07188648
cg07214920
cg07218647
cg07220152
cg07222414
cg07226162
cg07254987
cg07259110
cg07274307
cg07288541
cg07313373
cg07333231
cg07345108
cg07349094
cg07363676
cg07368069
cg07372034
cg07405796
cg07405810
cg07421596
cg07422042
cg07453778
cg07468752
cg07483650
cg07498415
cg07499182
cg07500806
cg07532405
cg07536737
cg07537821
cg07539180
cg07547054
cg07550278
cg07554046
cg07554474
cg07621224
cg07649206
cg07652954
cg07658936
cg07660627
cg07679836
cg07695771
cg07737292
cg07741184
cg07744116
cg07744547
cg07745671
cg07754492
cg07755689
cg07774589
cg07787632
cg07805040
cg07816074
cg07824636
cg07830160
cg07856521
cg07858613
cg07866212
cg07880109
cg07906724
cg07911587
cg07911961
cg07915356
cg07921030
cg07934818
cg07946277
cg07966808
cg07970948
cg07974627
cg07984515
cg07992044
cg07997575
cg08003353
cg08005122
cg08018809
cg08021393
cg08035323
cg08047417
cg08055667
cg08070646
cg08078648
cg08108224
cg08123444
cg08127080
cg08130572
cg08178786
cg08180285
cg08189198
cg08190545
cg08194011
cg08198540
cg08210506
cg08224785
cg08261525
cg08264885
cg08269653
cg08273995
cg08275025
cg08281415
cg08284263
cg08288074
cg08302325
cg08307963
cg08339076
cg08344524
cg08349497
cg08367275
cg08421351
cg08425796
cg08433696
cg08445740
cg08486269
cg08500112
cg08500740
cg08508431
cg08535374
cg08539872
cg08540215
cg08572767
cg08585315
cg08596486
cg08623277
cg08628875
cg08634762
cg08637874
cg08640466
cg08651573
cg08660295
cg08675565
cg08691328
cg08711067
cg08719642
cg08752459
cg08754088
cg08755532
cg08757862
cg08769507
cg08774452
cg08804892
cg08811171
cg08811815
cg08822602
cg08824350
cg08832744
cg08845685
cg08861404
cg08863422
cg08863939
cg08878263
cg08885179
cg08886267
cg08888918
cg08893036
cg08895013
cg08899632
cg08903441
cg08913523
cg08931861
cg08939394
cg08955792
cg08974687
cg08978399
cg08985336
cg08986767
cg09000385
cg09010499
cg09036468
cg09059822
cg09063936
cg09076720
cg09077167
cg09078293
cg09079018
cg09080173
cg09100014
cg09114581
cg09120873
cg09121680
cg09134668
cg09150633
cg09155575
cg09157272
cg09171882
cg09179845
cg09186897
cg09196959
cg09212468
cg09223940
cg09225373
cg09228831
cg09231843
cg09247175
cg09247297
cg09248694
cg09249446
cg09251764
cg09252806
cg09258479
cg09272948
cg09293718
cg09298183
cg09312407
cg09316306
cg09321817
cg09326529
cg09334188
cg09341730
cg09347959
cg09354380
cg09401705
cg09410271
cg09412707
cg09435920
cg09439765
cg09442452
cg09452568
cg09456094
cg09487078
cg09493313
cg09508289
cg09517283
cg09518384
cg09540111
cg09567013
cg09569432
cg09576532
cg09577651
cg09584650
cg09596131
cg09599529
cg09607363
cg09610332
cg09617296
cg09627247
cg09636163
cg09645818
cg09650907
cg09652526
cg09656239
cg09659400
cg09678939
cg09684429
cg09696535
cg09701880
cg09705784
cg09717261
cg09732282
cg09747232
cg09759719
cg09800500
cg09814551
cg09814633
cg09826895
cg09837245
cg09840328
cg09852221
cg09852619
cg09862148
cg09862950
cg09867755
cg09876447
cg09877009
cg09887589
cg09905511
cg09909069
cg09914480
cg09933836
cg09937039
cg09941112
cg09946832
cg09948958
cg09955859
cg09966895
cg09971674
cg09972836
cg09985455
cg09985845
cg10011792
cg10040116
cg10044101
cg10058920
cg10076006
cg10088890
cg10090521
cg10092935
cg10103002
cg10103850
cg10104290
cg10106388
cg10108468
cg10111008
cg10111764
cg10129493
cg10169462
cg10172675
cg10185424
cg10191240
cg10207187
cg10215323
cg10218000
cg10224107
cg10237362
cg10244364
cg10244594
cg10251368
cg10257070
cg10259094
cg10259521
cg10260050
cg10267724
cg10278520
cg10283695
cg10340801
cg10345429
cg10364968
cg10366093
cg10372920
cg10388307
cg10397389
cg10406414
cg10418263
cg10423607
cg10439431
cg10455940
cg10460033
cg10462643
cg10465696
cg10495270
cg10497345
cg10503655
cg10509604
cg10513595
cg10521711
cg10522770
cg10529555
cg10543947
cg10550308
cg10566610
cg10585371
cg10600004
cg10601234
cg10602473
cg10606240
cg10612867
cg10629165
cg10635443
cg10664993
cg10699171
cg10726355
cg10728351
cg10735319
cg10758454
cg10759572
cg10774352
cg10777347
cg10782703
cg10784511
cg10784519
cg10790470
cg10790672
cg10791260
cg10794973
cg10812236
cg10814005
cg10816760
cg10821127
cg10824354
cg10832107
cg10854029
cg10855978
cg10857729
cg10861390
cg10868210
cg10870165
cg10876003
cg10877050
cg10884539
cg10887366
cg10900049
cg10907025
cg10916967
cg10923346
cg10929442
cg10936879
cg10937408
cg10943263
cg10949007
cg10952220
cg10955208
cg10961099
cg11005552
cg11009736
cg11012078
cg11029716
cg11033588
cg11063495
cg11081307
cg11088135
cg11097954
cg11107966
cg11127711
cg11137709
cg11145632
cg11150559
cg11150901
cg11183156
cg11206811
cg11212172
cg11219400
cg11220623
cg11238995
cg11247129
cg11263235
cg11265160
cg11270005
cg11278727
cg11313997
cg11316887
cg11316904
cg11316940
cg11324116
cg11326311
cg11347165
cg11352681
cg11380329
cg11381564
cg11390504
cg11394600
cg11414267
cg11419025
cg11422846
cg11437465
cg11451266
cg11468953
cg11484353
cg11493509
cg11496559
cg11503710
cg11508714
cg11519930
cg11541382
cg11558850
cg11563844
cg11570286
cg11571304
cg11581627
cg11584277
cg11608005
cg11610626
cg11626007
cg11653519
cg11654769
cg11664456
cg11671363
cg11679124
cg11695653
cg11702456
cg11714752
cg11757945
cg11767757
cg11775488
cg11789820
cg11796313
cg11798406
cg11810743
cg11811510
cg11813810
cg11819201
cg11827097
cg11854928
cg11861766
cg11880646
cg11883141
cg11901695
cg11902863
cg11934771
cg11934819
cg11964308
cg11988531
cg12005824
cg12011522
cg12015748
cg12024826
cg12033619
cg12042264
cg12048225
cg12054453
cg12056353
cg12062597
cg12064202
cg12073319
cg12074329
cg12087695
cg12096720
cg12098750
cg12102151
cg12116192
cg12133754
cg12135457
cg12136514
cg12140977
cg12155476
cg12161970
cg12181407
cg12186771
cg12190322
cg12205822
cg12209042
cg12209448
cg12230983
cg12237946
cg12241963
cg12245236
cg12263990
cg12296552
cg12342675
cg12350196
cg12364741
cg12383352
cg12391576
cg12403190
cg12412089
cg12412531
cg12417549
cg12420683
cg12421834
cg12422844
cg12434362
cg12442125
cg12447687
cg12456777
cg12457415
cg12463199
cg12476968
cg12518626
cg12527478
cg12534147
cg12542933
cg12549411
cg12569007
cg12582181
cg12590404
cg12591315
cg12593764
cg12598524
cg12614090
cg12622958
cg12623364
cg12625437
cg12633355
cg12648893
cg12656312
cg12658947
cg12661316
cg12664649
cg12666899
cg12697139
cg12715811
cg12723011
cg12725760
cg12728240
cg12738008
cg12743031
cg12753009
cg12761965
cg12769118
cg12769705
cg12788666
cg12792775
cg12799862
cg12820310
cg12835313
cg12845215
cg12845952
cg12856114
cg12903224
cg12907644
cg12907959
cg12910851
cg12911732
cg12912949
cg12914657
cg12921375
cg12942606
cg12951282
cg12999267
cg13013900
cg13017318
cg13031167
cg13041597
cg13043150
cg13043454
cg13048911
cg13060970
cg13062935
cg13069531
cg13070763
cg13074866
cg13077247
cg13091538
cg13098082
cg13114497
cg13126982
cg13136655
cg13144783
cg13170031
cg13172432
cg13176778
cg13191127
cg13198342
cg13217159
cg13224075
cg13225272
cg13245264
cg13252226
cg13257263
cg13273136
cg13275603
cg13279811
cg13280803
cg13337716
cg13341412
cg13376104
cg13376120
cg13408086
cg13411948
cg13418632
cg13425174
cg13427728
cg13427748
cg13432032
cg13434497
cg13434570
cg13435792
cg13447408
cg13475583
cg13480578
cg13480818
cg13482327
cg13485320
cg13486755
cg13487102
cg13488556
cg13500029
cg13502686
cg13519595
cg13533935
cg13544946
cg13548452
cg13559306
cg13563405
cg13569323
cg13573115
cg13574809
cg13581974
cg13585334
cg13585930
cg13591783
cg13594463
cg13598159
cg13608629
cg13609457
cg13610168
cg13615963
cg13617155
cg13622821
cg13628022
cg13656752
cg13667021
cg13674369
cg13689411
cg13690280
cg13693136
cg13695535
cg13696148
cg13699887
cg13712012
cg13713851
cg13716760
cg13720581
cg13727946
cg13731777
cg13739417
cg13747967
cg13748755
cg13762704
cg13763876
cg13764915
cg13772414
cg13772515
cg13775050
cg13787850
cg13790288
cg13792045
cg13794404
cg13802966
cg13805795
cg13815820
cg13819577
cg13822849
cg13840520
cg13850063
cg13855715
cg13857933
cg13875008
cg13889508
cg13895441
cg13897122
cg13900763
cg13918228
cg13919694
cg13972124
cg13981787
cg13983686
cg14013497
cg14020652
cg14030904
cg14033614
cg14057952
cg14069635
cg14072120
cg14076977
cg14082061
cg14085715
cg14093255
cg14116153
cg14128411
cg14129735
cg14133945
cg14138132
cg14138884
cg14141912
cg14149492
cg14155831
cg14173968
cg14183013
cg14185201
cg14195059
cg14195216
cg14213581
cg14219543
cg14230719
cg14239366
cg14260630
cg14269109
cg14272084
cg14291650
cg14330675
cg14331016
cg14385362
cg14389582
cg14409083
cg14411929
cg14416623
cg14424070
cg14424625
cg14441948
cg14455613
cg14478797
cg14479306
cg14484973
cg14488466
cg14499577
cg14503489
cg14506696
cg14518178
cg14518658
cg14519664
cg14529406
cg14537800
cg14554869
cg14564351
cg14565485
cg14569771
cg14575255
cg14575687
cg14577174
cg14592365
cg14606858
cg14622879
cg14628343
cg14633527
cg14637111
cg14640149
cg14640532
cg14645841
cg14656245
cg14671764
cg14673267
cg14687029
cg14687145
cg14701867
cg14717122
cg14718363
cg14719333
cg14721981
cg14723921
cg14731462
cg14741474
cg14743210
cg14754581
cg14762436
cg14769754
cg14789590
cg14817130
cg14825340
cg14825633
cg14834675
cg14846617
cg14856585
cg14864508
cg14884256
cg14891022
cg14893576
cg14904363
cg14911314
cg14916288
cg14940898
cg14943135
cg14944923
cg14947787
cg14954688
cg14958969
cg14959908
cg14960043
cg14965639
cg14967066
cg14975547
cg14976447
cg14991821
cg14992144
cg15001364
cg15010554
cg15028548
cg15029475
cg15034393
cg15046909
cg15082751
cg15090036
cg15094236
cg15112210
cg15120220
cg15132169
cg15153684
cg15158847
cg15160843
cg15173780
cg15175581
cg15189015
cg15193228
cg15202500
cg15227994
cg15233292
cg15239904
cg15241236
cg15241786
cg15253861
cg15266672
cg15270561
cg15276922
cg15287092
cg15291410
cg15302530
cg15348972
cg15355388
cg15360648
cg15363887
cg15367247
cg15374234
cg15405515
cg15415194
cg15418593
cg15435730
cg15439110
cg15454811
cg15463966
cg15493035
cg15497834
cg15506126
cg15518400
cg15520443
cg15535471
cg15549075
cg15554421
cg15566921
cg15577373
cg15587041
cg15598511
cg15609678
cg15621874
cg15626285
cg15640993
cg15645309
cg15647364
cg15648444
cg15680603
cg15686949
cg15699766
cg15702677
cg15705054
cg15710143
cg15733114
cg15742777
cg15771336
cg15777335
cg15797286
cg15827388
cg15829654
cg15840891
cg15841205
cg15845333
cg15848159
cg15858483
cg15858970
cg15867125
cg15874872
cg15897209
cg15898874
cg15900979
cg15903185
cg15934674
cg15935291
cg15938050
cg15941014
cg15943274
cg15947283
cg15952465
cg15958424
cg15964187
cg15971980
cg15977267
cg15977685
cg15999188
cg16000018
cg16008979
cg16021018
cg16022049
cg16037142
cg16047144
cg16052198
cg16066219
cg16072340
cg16093580
cg16100486
cg16101148
cg16104139
cg16107389
cg16108507
cg16109862
cg16117774
cg16123269
cg16125375
cg16130238
cg16143578
cg16143804
cg16163140
cg16163382
cg16163419
cg16173847
cg16188984
cg16190888
cg16196274
cg16205490
cg16206344
cg16244648
cg16252933
cg16259043
cg16263152
cg16271437
cg16276348
cg16296536
cg16318240
cg16323330
cg16327489
cg16329014
cg16331599
cg16335098
cg16339155
cg16360777
cg16371230
cg16379533
cg16384864
cg16386945
cg16387850
cg16398511
cg16408820
cg16410115
cg16449620
cg16451371
cg16465430
cg16472904
cg16474725
cg16491547
cg16518861
cg16534399
cg16543027
cg16544768
cg16548201
cg16550264
cg16555388
cg16557204
cg16557964
cg16558695
cg16567056
cg16575248
cg16581800
cg16586104
cg16597079
cg16612699
cg16617257
cg16644967
cg16659657
cg16675644
cg16676200
cg16684117
cg16705546
cg16717773
cg16723381
cg16730737
cg16745604
cg16782184
cg16793781
cg16795307
cg16795564
cg16798537
cg16809304
cg16809762
cg16814060
cg16849268
cg16884847
cg16889054
cg16904399
cg16914035
cg16931664
cg16939391
cg16942223
cg16943053
cg16960573
cg16962557
cg16965605
cg16993582
cg17004653
cg17033166
cg17034508
cg17069739
cg17083209
cg17091056
cg17095652
cg17113029
cg17126947
cg17133833
cg17157516
cg17171407
cg17182817
cg17222033
cg17244340
cg17248961
cg17256711
cg17263363
cg17271960
cg17272620
cg17272868
cg17279410
cg17282466
cg17311649
cg17330097
cg17332603
cg17335114
cg17347941
cg17352995
cg17373345
cg17375177
cg17383853
cg17388996
cg17407331
cg17423416
cg17445830
cg17449197
cg17453252
cg17459778
cg17464982
cg17489695
cg17501395
cg17510003
cg17511017
cg17514766
cg17526462
cg17552333
cg17555712
cg17566874
cg17583432
cg17584530
cg17585181
cg17587456
cg17591741
cg17607231
cg17617953
cg17640322
cg17663774
cg17666418
cg17679604
cg17681527
cg17684207
cg17689601
cg17694130
cg17699374
cg17701159
cg17702455
cg17713010
cg17731243
cg17738521
cg17740401
cg17751776
cg17753212
cg17753356
cg17786516
cg17789464
cg17813328
cg17815820
cg17824540
cg17828255
cg17834338
cg17836145
cg17837069
cg17837521
cg17854066
cg17868893
cg17879722
cg17888985
cg17896243
cg17916960
cg17918270
cg17939295
cg17941330
cg17945004
cg17945153
cg17962671
cg17967818
cg17972606
cg18009574
cg18049030
cg18049228
cg18049414
cg18051527
cg18052511
cg18066182
cg18084999
cg18097277
cg18101157
cg18107094
cg18147606
cg18148375
cg18154283
cg18172830
cg18195130
cg18220863
cg18257574
cg18265887
cg18275512
cg18294257
cg18301136
cg18334681
cg18373623
cg18381283
cg18390495
cg18400454
cg18407309
cg18417373
cg18419045
cg18419977
cg18434367
cg18437209
cg18451766
cg18458689
cg18463607
cg18489994
cg18502397
cg18527583
cg18545596
cg18564686
cg18572214
cg18595780
cg18603788
cg18607901
cg18626958
cg18631920
cg18635896
cg18642369
cg18645493
cg18650367
cg18669406
cg18670483
cg18716635
cg18719939
cg18733757
cg18736448
cg18748374
cg18752527
cg18757155
cg18773597
cg18774692
cg18780489
cg18805978
cg18810681
cg18824027
cg18846883
cg18853490
cg18877361
cg18887769
cg18890112
cg18890461
cg18908499
cg18951352
cg18951674
cg18956547
cg18972123
cg18994606
cg19000089
cg19005955
cg19017581
cg19024989
cg19034132
cg19088984
cg19116718
cg19128723
cg19136454
cg19143950
cg19153095
cg19159011
[truncated: 830 more rows]
