# Supplementary material for: Genome Wide DNA Methylation Profiles Provide Clues to the Origin and Pathogenesis of Germ Cell Tumors
Source: PLoS One. 2015 Apr 10;10(4):e0122146. doi: 10.1371/journal.pone.0122146 (PMC4479500; doi:10.1371/journal.pone.0122146)
Supplement: S2 Table — (A) SE/DG vs EC/mNS; (B) SE/DG vs type I TE; (C) EC/mNS vs type I TE; (D) SE/DG vs SS. Rows indicate the functional categories. Columns indicate the number of probes in the non-DMP and both subtype specific DMP sets. Next, the fraction (%) of this count relative to all non-DMPs or either set of DMPs is presented. The log-scores are calculated as log2(%DMP/%non-DMPs) and visually presented in Fig 3 for those categories showing significant over-/underrepresentation. Significance of the enrichment was evaluated using a two-sided Fisher Exact test with a Bonferroni corrected α threshold as specified in the Materials & Methods section. (XLSX) [file pone.0122146.s008.xlsx]

## Sheet: A. SE_DG.vs.EC_mNS
	COUNTS.non.significant	COUNTS.hypermethylated.EC/mNS	COUNTS.hypermethylated.SE/DG	PRC.non.significant	PRC.hypermethylated.EC/mNS	PRC.hypermethylated.SE/DG	LOGSCORE.hypermethylated.EC/mNS	LOGSCORE.hypermethylated.SE/DG	P.hypermethylated.EC/mNS	P.hypermethylated.SE/DG
TSS200	51743	5064	0	0.158036	0.0458438	0	-1.78545	NA	0	0.598784
TSSAssociated	108285	18751	1	0.330729	0.169751	0.166667	-0.962233	-0.988684	0	0.670809
GENE.EXON1	32628	3208	0	0.099654	0.0290417	0	-1.7788	NA	0	1
GENE.5UTR	49649	9688	1	0.15164	0.0877044	0.166667	-0.789932	0.136313	0	1
GENE.BODY	113041	45328	3	0.345255	0.410349	0.5	0.24919	0.534265	0	0.422147
GENE.3UTR	11898	5953	0	0.0363394	0.0538918	0	0.568531	NA	1.91428e-135	1
LINE	10794	7190	0	0.0329675	0.0650903	0	0.981396	NA	0	1
SINE	13351	7892	0	0.0407772	0.0714454	0	0.809077	NA	0	1
Island	127519	8819	1	0.389474	0.0798374	0.166667	-2.28639	-1.22456	0	0.414975
IslandAssociated	236315	44336	5	0.721764	0.401369	0.833333	-0.846599	0.207366	0	1
MIR200	924	419	0	0.00282212	0.00379316	0	0.426619	NA	8.77779e-07	1
MIR1500	2030	916	0	0.00620012	0.00829244	0	0.419501	NA	6.73514e-13	1
ICR-P	250	3	0	0.000763562	2.71587e-05	0	-4.81326	NA	1.84882e-27	1
IMPR_P200	572	66	0	0.00174703	0.000597491	0	-1.54792	NA	3.77154e-21	1
IMPR_P1500	1462	197	0	0.00446531	0.00178342	0	-1.32411	NA	8.47178e-42	1
ICR-M	18	0	0	5.49764e-05	0	0	NA	NA	0.0111489	1
IMPR_M200	563	47	0	0.00171954	0.000425486	0	-2.01484	NA	6.98848e-29	1
IMPR_M1500	1932	333	0	0.0059008	0.00301461	0	-0.96894	NA	2.7982e-34	1

## Sheet: B. SE_DG.vs.type.I.TE
	COUNTS.non.significant	COUNTS.hypermethylated.type.I.TE	COUNTS.hypermethylated.SE/DG	PRC.non.significant	PRC.hypermethylated.type.I.TE	PRC.hypermethylated.SE/DG	LOGSCORE.hypermethylated.type.I.TE	LOGSCORE.hypermethylated.SE/DG	P.hypermethylated.type.I.TE	P.hypermethylated.SE/DG
TSS200	54952	1844	11	0.14421	0.0324854	0.180328	-2.15031	0.322453	0	0.463586
TSSAssociated	118622	8396	19	0.311298	0.147911	0.311475	-1.07357	0.000821606	0	1
GENE.EXON1	34635	1195	6	0.0908922	0.0210521	0.0983607	-2.11019	0.113926	0	0.822346
GENE.5UTR	55241	4078	19	0.144968	0.0718413	0.311475	-1.01285	1.10338	0	0.000801569
GENE.BODY	122742	35613	17	0.32211	0.627387	0.278689	0.961802	-0.2089	0	0.583721
GENE.3UTR	12979	4872	0	0.0340606	0.085829	0	1.33336	NA	0	0.274834
LINE	15397	2587	0	0.0404061	0.0455747	0	0.173658	NA	1.17803e-08	0.180721
SINE	18322	2921	0	0.0480822	0.0514587	0	0.0979121	NA	0.000528802	0.121842
Island	124961	11337	41	0.327933	0.199722	0.672131	-0.715412	1.03534	0	5.39034e-08
IslandAssociated	241942	38662	52	0.634925	0.681101	0.852459	0.101282	0.425044	4.86131e-103	0.000261614
MIR200	1081	262	0	0.00283685	0.0046156	0	0.702227	NA	1.52529e-11	1
MIR1500	2425	521	0	0.00636389	0.00917835	0	0.528325	NA	2.6203e-13	1
ICR-P	229	24	0	0.000600962	0.000422803	0	-0.507286	NA	0.110954	1
IMPR_P200	591	47	0	0.00155095	0.00082799	0	-0.905471	NA	8.78966e-06	1
IMPR_P1500	1501	158	0	0.00393905	0.00278345	0	-0.500973	NA	1.51888e-05	1
ICR-M	18	0	0	4.72372e-05	0	0	NA	NA	0.155683	1
IMPR_M200	569	41	0	0.00149322	0.000722289	0	-1.04778	NA	8.89138e-07	1
IMPR_M1500	2078	187	0	0.00545327	0.00329434	0	-0.727131	NA	1.81095e-12	1

## Sheet: C. EC_mNS.vs.type.I.TE
	COUNTS.non.significant	COUNTS.hypermethylated.type.I.TE	COUNTS.hypermethylated.EC/mNS	PRC.non.significant	PRC.hypermethylated.type.I.TE	PRC.hypermethylated.EC/mNS	LOGSCORE.hypermethylated.type.I.TE	LOGSCORE.hypermethylated.EC/mNS	P.hypermethylated.type.I.TE	P.hypermethylated.EC/mNS
TSS200	54520	532	1755	0.130134	0.35	0.100822	1.42736	-0.36819	2.59769e-105	1.84129e-31
TSSAssociated	121911	827	4299	0.290989	0.544079	0.24697	0.902851	-0.236631	1.47865e-93	4.0666e-37
GENE.EXON1	34345	322	1169	0.081978	0.211842	0.0671569	1.36968	-0.287701	4.40705e-55	7.15105e-13
GENE.5UTR	56689	409	2240	0.135311	0.269079	0.128684	0.991753	-0.0724458	7.03869e-43	0.0119937
GENE.BODY	151418	340	6614	0.361419	0.223684	0.379962	-0.69221	0.0721825	6.24391e-31	6.84708e-07
GENE.3UTR	17253	8	590	0.0411811	0.00526316	0.0338944	-2.96798	-0.280936	4.01737e-18	1.14017e-06
LINE	17603	13	368	0.0420165	0.00855263	0.0211409	-2.29652	-0.990919	8.76572e-15	6.73188e-50
SINE	20803	20	420	0.0496546	0.0131579	0.0241282	-1.916	-1.04121	2.45653e-14	1.25737e-63
Island	130483	1071	4785	0.311449	0.704605	0.274889	1.17782	-0.180147	4.68912e-216	5.4441e-25
IslandAssociated	268211	1398	11047	0.640192	0.919737	0.63463	0.522716	-0.0125895	4.96349e-142	0.136055
MIR200	1303	0	40	0.00311013	0	0.00229793	NA	-0.436641	0.017784	0.0590888
MIR1500	2849	2	95	0.00680027	0.00131579	0.00545757	-2.36966	-0.317332	0.00420776	0.0333692
ICR-P	240	0	13	0.000572855	0	0.000746826	NA	0.382601	1	0.332777
IMPR_P200	612	0	26	0.00146078	0	0.00149365	NA	0.0321042	0.182172	0.839931
IMPR_P1500	1603	0	56	0.0038262	0	0.0032171	NA	-0.250151	0.00555312	0.231818
ICR-M	18	0	0	4.29641e-05	0	0	NA	NA	1	1
IMPR_M200	571	5	34	0.00136292	0.00328947	0.00195324	1.27116	0.519168	0.0599088	0.0474169
IMPR_M1500	2123	10	132	0.00506738	0.00657895	0.00758316	0.376616	0.581558	0.363895	1.89828e-05

## Sheet: D. SE_DG.vs.SS
	COUNTS.non.significant	COUNTS.hypermethylated.SS	COUNTS.hypermethylated.SE/DG	PRC.non.significant	PRC.hypermethylated.SS	PRC.hypermethylated.SE/DG	LOGSCORE.hypermethylated.SS	LOGSCORE.hypermethylated.SE/DG	P.hypermethylated.SS	P.hypermethylated.SE/DG
TSS200	55578	322	907	0.13242	0.113781	0.0591265	-0.218859	-1.16324	0.00316433	2.9378e-187
TSSAssociated	122074	580	4383	0.290853	0.204947	0.285724	-0.505037	-0.0256676	3.66042e-25	0.171687
GENE.EXON1	34875	231	730	0.0830929	0.0816254	0.047588	-0.0257061	-0.804127	0.810961	2.97287e-64
GENE.5UTR	57497	399	1442	0.136992	0.140989	0.0940026	0.0414963	-0.543318	0.528266	1.26192e-57
GENE.BODY	151726	865	5781	0.361501	0.305654	0.376858	-0.242102	0.0600204	4.64967e-10	0.000106888
GENE.3UTR	16911	63	877	0.040292	0.0222615	0.0571708	-0.855944	0.504785	1.89179e-07	8.97713e-23
LINE	17261	150	573	0.0411259	0.0530035	0.0373533	0.366041	-0.138811	0.00234924	0.0202312
SINE	20322	101	820	0.048419	0.035689	0.053455	-0.440093	0.142751	0.00130349	0.00494601
Island	131748	158	4433	0.313902	0.0558304	0.288983	-2.49119	-0.119328	1.20642e-252	4.76868e-11
IslandAssociated	267702	629	12325	0.637825	0.222261	0.803455	-1.5209	0.333058	0	0
MIR200	1305	6	32	0.00310928	0.00212014	0.00208605	-0.552421	-0.575808	0.493806	0.0212762
MIR1500	2865	14	67	0.00682613	0.004947	0.00436767	-0.464514	-0.644204	0.252262	0.000129747
ICR-P	201	0	52	0.000478901	0	0.00338983	NA	2.82341	0.64886	9.33483e-25
IMPR_P200	567	0	71	0.00135093	0	0.00462842	NA	1.77657	0.0376049	3.84603e-17
IMPR_P1500	1535	0	124	0.00365728	0	0.00808344	NA	1.1442	5.71706e-05	1.72238e-14
ICR-M	16	0	2	3.81215e-05	0	0.000130378	NA	1.77403	1	0.131163
IMPR_M200	583	2	25	0.00138905	0.000706714	0.00162973	-0.974902	0.23053	0.450696	0.439535
IMPR_M1500	2131	11	123	0.0050773	0.00388693	0.00801825	-0.385433	0.659226	0.504246	3.20014e-06
