# Supplementary material for: Genome Wide DNA Methylation Profiles Provide Clues to the Origin and Pathogenesis of Germ Cell Tumors
Source: PLoS One. 2015 Apr 10;10(4):e0122146. doi: 10.1371/journal.pone.0122146 (PMC4479500; doi:10.1371/journal.pone.0122146)
Supplement: S3 Table — List of DMRs for each pair of GCT subtypes. (Recurrent tumor DMRs) Gene symbols that occurred in more than one DMR; either irrespective of DMR subset (n.total.occurences) or in multiple independent DMR subsets (n.dmr.lists) (Overlap tumor and CL DMRs) Gene symbols involved in DMRs identified between both the tumor groups and the cell lines. The second column indicates in which tumor comparisons the gene symbol was involved in a DMR. (XLSX) [file pone.0122146.s009.xlsx]

## Sheet: EC_mNSvstype.I.TE-HYPER-EC_mNS
	chr	start.bp.no.wd	end.bp.no.wd	gene.symbol	nr.diff.probes	nr.probes	window.bp
1	1	1107820	1110832	RP11-465B22.8; TTLL10; TTLL10-AS1	8	12	602
2	1	1114083	1116920	TTLL10; TTLL10-AS1	5	13	567
3	1	1180757	1183658	FAM132A; RP5-902P8.12	7	9	580
4	1	1265178	1268436	GLTPD1; TAS1R3; DVL1	9	18	652
5	1	1368772	1371775	VWA1; RP4-758J18.10	5	10	601
6	1	1565351	1568820	MIB2; MMP23B; CDK11B	8	11	694
7	1	2003968	2006560	PRKCZ	5	14	518
8	1	2119985	2122724	AL590822.2; C1orf86	5	8	548
9	1	2137953	2140905	C1orf86; AL590822.1	6	8	590
10	1	2161001	2164437	SKI	5	9	687
11	1	2221253	2223674	SKI	5	6	484
12	1	2432226	2438658	PLCH2; PANK4	11	17	1286
13	1	3132763	3136001	PRDM16	5	10	648
14	1	3142018	3145209	PRDM16	6	9	638
15	1	3227966	3230921	PRDM16; RP11-22L13.1	5	10	591
16	1	3393013	3395871	ARHGEF16	5	7	572
17	1	3622319	3625292	TP73	6	7	595
18	1	6092972	6095993	KCNAB2	5	6	604
19	1	6302279	6305499	HES3; GPR153	6	12	644
20	1	6506693	6510182	ESPN; RP1-202O8.2	8	9	698
21	1	6544157	6547083	PLEKHG5	5	11	585
22	1	8402631	8405050	SLC45A1	5	6	484
23	1	15540182	15542446	TMEM51	5	7	453
24	1	18805700	18808594	KLHDC7A	5	9	579
25	1	20615975	20618456	VWA5B1; RP4-745E8.2	5	8	496
26	1	34630324	34634066	C1orf94; CSMD2	8	17	748
27	1	34641383	34644106	C1orf94; AC115286.1	9	15	545
28	1	38229769	38231887	EPHA10	5	12	424
29	1	39406387	39408851	RHBDL2	5	7	493
30	1	40136089	40139052	NT5C1A	5	9	593
31	1	41831032	41833649	FOXO6	5	5	523
32	1	44397868	44400776	ST3GAL3; ARTN	6	12	582
33	1	53097641	53100248	FAM159A	5	8	521
34	1	60391328	60393933	CYP2J2	5	9	521
35	1	65729351	65732689	DNAJC6	7	12	668
36	1	66256553	66259046	PDE4B	6	11	499
37	1	75592018	75595261	LHX8; RP11-510C10.4; RP11-510C10.2; RP11-510C10.3	6	11	649
38	1	78955268	78958515	PTGFR	5	8	649
39	1	91181128	91183856	BARHL2	7	13	546
40	1	110671769	110674319		5	7	510
41	1	112057236	112059750	ADORA3	5	5	503
42	1	119525882	119531702	TBX15	19	29	1164
43	1	146542992	146545645	NBPF13P	5	6	531
44	1	146548909	146553390	RNVU1-8; NBPF13P; RP11-325P15.2	10	14	896
45	1	147780600	147783558		5	8	592
46	1	149398174	149401082	RP5-998N21.7; HIST2H2BB; RP5-998N21.10; HIST2H3PS2	5	8	582
47	1	153506498	153509875	BX470102.3; S100A6; S100A5	10	16	675
48	1	153520712	153523973	S100A4; S100A3	5	7	652
49	1	156356839	156359612	RHBG; RP11-139I14.2	7	12	555
50	1	161227203	161230027	PCP4L1	6	9	565
51	1	162600334	162603295	DDR2	6	8	592
52	1	165512253	165514361	LRRC52; RP11-280O1.2	5	8	422
53	1	173637690	173640130	ANKRD45	5	10	488
54	1	179710583	179713158	RP11-12M5.1; FAM163A	6	14	515
55	1	180200206	180204837	LHX4	7	16	926
56	1	197880540	197883469	LHX9	5	14	586
57	1	197886955	197889512	LHX9	5	13	511
58	1	201251200	201254971	PKP1	8	14	754
59	1	201856296	201859661	SHISA4	5	14	673
60	1	202090865	202093296	GPR37L1	6	12	486
61	1	209847535	209850185	G0S2; RP1-28O10.1	7	11	530
62	1	228656381	228659397		5	9	603
63	1	229566560	229571288	ACTA1	13	24	946
64	1	234666087	234668500	RP5-855F14.1	5	5	483
65	10	529714	533409	DIP2C	8	20	739
66	10	8074716	8077969		5	6	651
67	10	8077038	8079357		5	9	464
68	10	23477530	23481316	PTF1A	8	11	757
69	10	23483025	23485867	PTF1A	5	5	568
70	10	30316625	30318994	KIAA1462	5	6	474
71	10	43817243	43819695	RP11-168L22.2	5	9	490
72	10	47082283	47084398	NPY4R; LINC00842	5	10	423
73	10	50819278	50823752	CHAT; SLC18A3	10	18	895
74	10	71335773	71339674	RP11-343J3.2; NEUROG3	6	14	780
75	10	73846257	73849463	SPOCK2	8	18	641
76	10	88426435	88429247	OPN4; LDB3	7	12	562
77	10	90711478	90713748	STAMBPL1; ACTA2	5	7	454
78	10	95325974	95328884	FFAR4	6	17	582
79	10	95359494	95362386	FFAR4; RBP4	5	7	578
80	10	98030125	98032750	BLNK	5	6	525
81	10	102278330	102280791	SEC31B; NDUFB8	9	13	492
82	10	102507286	102511568	PAX2	12	15	856
83	10	102879841	102882545	HUG1; TLX1NB	6	7	541
84	10	102881978	102885087	HUG1; TLX1NB	5	5	622
85	10	102894133	102897869	TLX1; RP11-31L23.3	6	12	747
86	10	102904079	102907949		6	7	774
87	10	102976637	102980058		7	14	684
88	10	102985636	102990254	LBX1-AS1; LBX1	7	31	924
89	10	102994987	102999662	LBX1-AS1	10	18	935
90	10	104534020	104537121	WBP1L	8	13	620
91	10	105210753	105213490	RP11-225H22.7; RP11-225H22.4; CALHM2; CALHM1	6	14	547
92	10	115997843	116000021	VWA2	5	12	436
93	10	120353081	120356756	PRLHR	8	17	735
94	10	124900456	124907930	HMX3; HMX2	15	30	1495
95	10	124907083	124909907	HMX2	5	15	565
96	10	126277272	126279502	LHPP	5	6	446
97	10	128992810	128995644	DOCK1; FAM196A	6	11	567
98	10	129532731	129538308	FOXI2; AL391005.1	13	21	1115
99	10	131810605	131812902		5	11	459
100	10	133999034	134002728	JAKMIP3; DPYSL4; RP11-140A10.3	5	15	739
101	10	134596884	134602341	INPP5A; RP11-288G11.3; NKX6-2	25	41	1091
102	10	134836806	134839656		5	13	570
103	10	134851810	134854344		5	7	507
104	10	134900199	134903278	GPR123; GPR123-AS1; AL445199.1	5	14	616
105	10	135049957	135053004	VENTX	12	42	609
106	10	135159697	135162047	ZNF511; PRAP1; BANF1P2; RP11-122K13.7	7	10	470
107	11	635659	638173	DRD4	6	13	503
108	11	1035471	1037938	MUC6	5	14	493
109	11	1240341	1245229	MUC5B	7	17	978
110	11	2010216	2012971	AC051649.6; MRPL23-AS1	6	10	551
111	11	2290652	2293691	ASCL2	15	44	608
112	11	2463970	2466491	KCNQ1	7	23	504
113	11	2870400	2872992	KCNQ1; KCNQ1-AS1	6	9	518
114	11	2889082	2891394	KCNQ1DN	5	39	462
115	11	2923523	2926623	SLC22A18; SLC22A18AS	7	25	620
116	11	10714175	10716595	MRVI1	8	13	484
117	11	14992562	14996231	CALCB; CALCA	18	40	734
118	11	17740925	17744610	MYOD1	6	17	737
119	11	18726321	18728949	TMEM86A; RP11-1081L13.4; IGSF22	5	6	526
120	11	19365654	19369112		5	11	692
121	11	20179437	20183575	DBX1	11	19	828
122	11	20616937	20621854	SLC6A5	16	26	983
123	11	20621652	20624913	SLC6A5	6	9	652
124	11	27014519	27016991	FIBIN	7	8	494
125	11	30036875	30040004	KCNA4	6	17	626
126	11	32448163	32451692	WT1	10	13	706
127	11	32453718	32456735	WT1-AS; WT1	10	15	603
128	11	32456727	32462240	WT1-AS; WT1	14	26	1103
129	11	43601920	43606269	HSD17B12; MIR129-2	6	20	870
130	11	45824445	45826518	SLC35C1	5	13	415
131	11	47277977	47280586	NR1H3	5	7	522
132	11	47735254	47738105	AGBL2; FNBP4	5	9	570
133	11	57088366	57091226	RP11-872D17.4; TNKS1BP1; SSRP1	5	5	572
134	11	57363841	57366088	SERPING1	6	11	449
135	11	62687748	62690557	AP000438.2; CHRM1	6	8	562
136	11	63869619	63872265	RP11-21A7A.2; FLRT1; MACROD1	5	9	529
137	11	64404346	64406993	NRXN2	5	6	529
138	11	65815463	65817819	SF3B2; GAL3ST3	6	10	471
139	11	66082224	66086250	RP11-867G23.13; CD248	8	15	805
140	11	67288522	67292531	CABP2	9	10	802
141	11	67382662	67385040	DOC2GP; RP11-655M14.13	5	7	476
142	11	67809742	67812641	TCIRG1	6	13	580
143	11	68778553	68782279	RP11-554A11.6; MRGPRF	11	20	745
144	11	68923746	68926191	RP11-554A11.9; RP11-554A11.8	5	5	489
145	11	69468175	69470719	CCND1; ORAOV1	5	11	509
146	11	69632959	69635400	FGF3	6	17	488
147	11	71723287	71725677	RP11-849H4.4; NUMA1	5	8	478
148	11	71750833	71753997	NUMA1	7	7	633
149	11	89223381	89226014	NOX4	6	13	527
150	11	93582253	93584763	VSTM5	7	12	502
151	11	105480283	105482988	GRIA4	5	16	541
152	11	113575693	113578528	TMPRSS5	6	7	567
153	11	115630116	115632452	AP000797.3; LINC00900	5	13	467
154	11	117746829	117749187	FXYD6-FXYD2; FXYD6	5	13	472
155	11	123395133	123397593	GRAMD1B	6	7	492
156	11	129684560	129687210	TMEM45B	5	9	530
157	12	6559162	6562547	CD27; TAPBPL; CD27-AS1	8	9	677
158	12	7022262	7024515	LRRC23; ENO2	5	13	451
159	12	7259608	7263021	C1RL-AS1; C1RL	11	19	683
160	12	16757112	16759836	MGST1; LMO3	5	22	545
161	12	47218737	47220841	SLC38A4	5	12	421
162	12	54319830	54323262		7	10	686
163	12	54365760	54368250	HOXC11; HOTAIR	5	13	498
164	12	56111820	56116029	RP11-644F5.10; BLOC1S1; RDH5; ITGA7	5	7	842
165	12	58118607	58122004	AGAP2-AS1; RP11-571M6.8; AGAP2	6	10	679
166	12	58128855	58134488	TSPAN31; AGAP2	13	16	1127
167	12	58289206	58291957	RP11-620J15.2	5	6	550
168	12	63024490	63027212		5	6	544
169	12	111617977	111621313	CUX2	6	11	667
170	12	121972871	121976669	KDM2B	8	9	760
171	12	124863528	124866130	RP11-408I18.9; NCOR2	5	5	520
172	12	131197873	131202389	RIMBP2; RP11-662M24.2	14	16	903
173	12	132662428	132664883		6	8	491
174	12	132903014	132907443	RP13-895J2.7; GALNT9	10	11	886
175	12	132972817	132977722		6	17	981
176	13	28363724	28369172	GSX1	8	22	1090
177	13	28393437	28397039		7	9	720
178	13	28495641	28499161	PDX1; PDX1-AS1	5	15	704
179	13	28499882	28504508	PDX1	12	13	925
180	13	28552805	28556387	URAD	5	10	716
181	13	36870646	36873155	SOHLH2; CCDC169-SOHLH2; CCDC169	9	15	502
182	13	46424210	46426904	SIAH3	7	14	539
183	13	53421381	53425716	PCDH8	9	21	867
184	13	95354117	95357202	RN7SL585P; LINC00391	6	9	617
185	13	99134543	99136804	STK24	6	6	452
186	13	110884015	110886926	COL4A1	5	5	582
187	13	112546341	112549065		6	7	545
188	13	112708256	112711548	SNORD44	6	9	658
189	13	112720725	112725221	SOX1	9	23	899
190	13	112759898	112762328	LINC00403; LINC00404	6	9	486
191	13	113775873	113778160	F7; F10	8	11	457
192	13	114105419	114109052	ADPRHL1; DCUN1D2	11	16	727
193	13	114320214	114322698	GRK1	5	10	497
194	13	114798652	114802132	RASA3	5	11	696
195	14	23304548	23306941	MRPL52; MMP14	5	9	479
196	14	36982146	36984949	RP11-896J10.3; SFTA3; NKX2-1	6	11	561
197	14	38676534	38681855	SSTR1	10	16	1064
198	14	69255677	69257977	ZFP36L1	5	6	460
199	14	76444988	76448413	IFT43; TGFB3	7	9	685
200	14	79745212	79747780	NRXN3	5	11	514
201	14	96669634	96672020	BDKRB2; RP11-404P21.8	6	10	477
202	14	101156915	101159251		5	5	467
203	14	101922218	101926619	RP11-1029J19.2	7	16	880
204	14	102025953	102028797	DIO3; DIO3OS	5	20	569
205	14	102028069	102032029	DIO3; DIO3OS	7	13	792
206	14	104685088	104688369	RP11-260M19.2	5	7	656
207	14	105035133	105038685	TMEM179	5	7	710
208	14	105308812	105311921	CTD-3051D23.1	5	8	622
209	14	105661787	105664478		6	6	538
210	15	28350607	28353347		5	8	548
211	15	45407574	45411236	DUOXA2; DUOX2; DUOXA1	5	9	732
212	15	45420068	45423083	DUOX1; DUOXA1	6	13	603
213	15	53078445	53082248	ONECUT1	5	7	761
214	15	53085630	53088887	ONECUT1	10	10	651
215	15	67416651	67419316	SMAD3	6	7	533
216	15	73610079	73612451	HCN4	5	6	474
217	15	74217418	74220307	LOXL1; LOXL1-AS1	9	19	578
218	15	74463972	74468158	ISLR; RP11-665J16.1	12	16	837
219	15	76003985	76006194	CSPG4	5	11	442
220	15	84046906	84049308	RP11-382A20.4	5	6	480
221	15	89909632	89913141	LINC00925; MIR9-3	6	11	702
222	15	96874210	96877367	NR2F2; MIR1469	5	13	631
223	16	215244	217757	HBM; HBZP1; Z84721.4	5	13	503
224	16	724416	726964	RHOT2; RHBDL1; LA16c-313D11.9	5	8	510
225	16	808679	811733	MSLN	6	17	611
226	16	831683	835201	MSLNL; RPUSD1	8	13	704
227	16	874257	877164		6	11	581
228	16	1059367	1062053		5	6	537
229	16	1127070	1129865	SSTR5; SSTR5-AS1	5	7	559
230	16	1128990	1132907	SSTR5; SSTR5-AS1	8	13	783
231	16	1580015	1583581	TMEM204; IFT140	6	7	713
232	16	1841146	1844753	NUBP2; SPSB3; IGFALS; HAGH	6	11	721
233	16	3999474	4002959	RP11-462G12.1; ADCY9	7	7	697
234	16	22958525	22961211		5	8	537
235	16	51145856	51148902		7	8	609
236	16	57405074	57407955	CX3CL1	5	7	576
237	16	66399320	66401599	CDH5	6	7	456
238	16	66877685	66880807	CA7; NAE1; RP11-61A14.1	6	13	624
239	16	67448835	67451719	ZDHHC1	5	9	577
240	16	67976865	67979450	LCAT; SLC12A4; CTC-479C5.17	7	11	517
241	16	69957189	69959964	WWP2	5	6	555
242	16	85318859	85321882	LINC00311	6	8	605
243	16	88133407	88136679	RP11-863P13.4	7	12	654
244	16	89136745	89140254		6	8	702
245	17	1955958	1960132	HIC1; MIR132; MIR212	17	46	835
246	17	4687629	4691632	TM4SF5; GLTPD2; VMO1	10	13	801
247	17	5024970	5027585	USP6; ZNF232; RP11-46I8.4	5	9	523
248	17	6678254	6680781	XAF1; FBXO39	10	11	505
249	17	6795745	6798771	ALOX12P2; AC027763.2	7	8	605
250	17	6944510	6948453	SLC16A13; SLC16A11	11	15	789
251	17	7282817	7285351	TNK1	6	7	507
252	17	7459690	7463249	TNFSF12; TNFSF12-TNFSF13; TNFSF13; SENP3	7	7	712
253	17	7831764	7834237	CNTROB; KCNAB3; RP11-1099M24.7; TRAPPC1	8	11	495
254	17	7904840	7907521	GUCY2D	5	10	536
255	17	7974779	7978057	ALOX12B	6	7	656
256	17	19650653	19653257	ALDH3A1	6	7	521
257	17	28561220	28565117	RP11-354P11.2; SLC6A4	8	13	779
258	17	32482950	32485259	ASIC2	6	14	462
259	17	33774779	33777683	SLFN13	10	16	581
260	17	33813163	33816451	RP11-1094M14.9; SLFN12L	7	10	658
261	17	35288432	35292580	LHX1; RP11-445F12.1	15	18	830
262	17	37306524	37309278	PLXDC1	6	12	551
263	17	37762735	37765706	NEUROD2	12	15	594
264	17	38706719	38709809	CCR7	6	6	618
265	17	40336534	40338892	HCRT; GHDC	5	6	472
266	17	43042737	43045808	C1QL1	5	9	614
267	17	46017654	46020184	PNPO; AC003665.1	8	9	506
268	17	46113615	46115933	COPZ2; MIR152	5	10	464
269	17	46680111	46684047	HOXB-AS3; HOXB3; HOXB6; HOXB7	10	19	787
270	17	46823292	46826371		5	5	616
271	17	48265593	48269233	COL1A1	6	9	728
272	17	48277852	48280076	COL1A1	6	7	445
273	17	48544950	48547554	ACSF2; CHAD	10	11	521
274	17	50235765	50238604	CA10	5	14	568
275	17	65039527	65041616	CACNG1	5	13	418
276	17	72207433	72210198	RPL38; TTYH2; CTD-2514K5.2	5	15	553
277	17	72919309	72921598	OTOP2; USH1G	5	17	458
278	17	74069269	74074876	ZACN; GALR2; SRP68; EXOC7	10	16	1121
279	17	75083623	75086390	LINC00338; SEC14L1; AC015815.3; AC015815.2; AC015815.6	10	12	553
280	17	75314081	75318185	2014-09-09	12	14	821
281	17	75882546	75885349		5	5	561
282	17	77763329	77766733	CBX2; CBX8	7	12	681
283	17	78160467	78162706	CARD14	5	9	448
284	17	78416789	78419076		5	7	457
285	17	78998362	79001676	CTD-2561B21.10; BAIAP2-AS1	5	11	663
286	17	79373340	79376254	RP11-1055B8.6; RP11-1055B8.7; MIR4740	5	11	583
287	17	79502642	79505745	FSCN2; C17orf70	6	8	621
288	17	79858809	79861645	ANAPC11; NPB; PCYT2	7	10	567
289	17	80290105	80293081	SECTM1	5	9	595
290	18	902764	906450	ADCYAP1; RP11-672L10.3; RP11-672L10.2	6	17	737
291	18	35145668	35149483	CELF4	5	28	763
292	18	44772985	44776413	SKOR2	5	7	686
293	18	49865097	49869552	DCC; RP11-25O3.1	17	33	891
294	18	72123660	72126544	FAM69C	5	8	577
295	19	494355	497428	MADCAM1; AC005775.2	7	8	615
296	19	1131256	1133537	SBNO2	8	10	456
297	19	1154030	1156738	SBNO2	5	7	542
298	19	1759259	1764800	ONECUT3	9	10	1108
299	19	2281010	2283729	C19orf35	5	7	544
300	19	2288682	2292780	LINGO3	8	10	820
301	19	2301474	2304032	LINGO3	5	6	512
302	19	10404083	10408184	ICAM5	6	10	820
303	19	10927172	10929696	DNM2; MIR199A1	8	9	505
304	19	12996997	12999435	CTD-2265O21.7; GCDH; KLF1	5	9	488
305	19	13079124	13081743	DAND5	5	6	524
306	19	13111283	13114893	NFIX	6	7	722
307	19	15120297	15122591	CCDC105; SLC1A6	5	15	459
308	19	15374283	15376418	BRD4	5	7	427
309	19	17876419	17878733	FCHO1	5	6	463
310	19	18384244	18386930	KIAA1683	5	7	537
311	19	23652200	23655274		5	6	615
312	19	35628275	35631474	FXYD1; CTD-2527I21.4; LGI4; AC020907.2	12	14	640
313	19	36245406	36249020	AC002398.9; LIN37; AC002398.12; C19orf55; AC002398.11; HSPB6	5	17	723
314	19	37824307	37827008	HKR1; CTD-3220F14.2	8	9	540
315	19	39522158	39524626	CTB-189B5.3; FBXO27	5	10	494
316	19	39753796	39757248	IFNL4P1; IFNL2	6	10	690
317	19	49925586	49928244	GFY; PTH2	6	11	532
318	19	50014523	50017850	FCGRT	6	12	665
319	19	50920997	50923484	POLD1; CTD-2545M3.6; SPIB	5	9	497
320	19	51016123	51019365	JOSD2; ASPDH; LRRC4B	6	9	648
321	19	51169816	51173144	SYT3; SHANK1	6	8	666
322	19	54384865	54388435	PRKCG	5	13	714
323	19	54926528	54929185	TTYH1	5	8	531
324	19	55887146	55890611	TMEM190; CTD-2105E13.15; TMEM238	5	12	693
325	2	23838710	23841763	KLHL29	7	8	611
326	2	24231856	24234341	MFSD2B	8	16	497
327	2	26784290	26786891	C2orf70	10	14	520
328	2	27300057	27302943	EMILIN1	7	8	577
329	2	27529455	27532535	TRIM54; UCN; MPV17	9	15	616
330	2	45167507	45170681	SIX3; RP11-89K21.1; SIX3-AS1	7	11	635
331	2	51258552	51261399	AC007682.1; NRXN1	5	9	569
332	2	74724040	74727892	TTC31; RP11-523H20.3; LBX2-AS1; LBX2; AC005041.17	5	10	770
333	2	87015259	87019585	CD8A	9	15	865
334	2	106680831	106683640	C2orf40	7	8	562
335	2	119612877	119617825		9	14	990
336	2	119912996	119916783	C1QL2	7	15	757
337	2	121103187	121106464	INHBB	7	11	655
338	2	121623862	121626735	GLI2; RP11-297J22.1	6	6	575
339	2	157175971	157180512	NR4A2	9	15	908
340	2	176930864	176934407		8	12	709
341	2	176935377	176938971		9	11	719
342	2	219847258	219850133	FEV	5	11	575
343	2	220281977	220284442	DES	5	13	493
344	2	223158838	223161569	CCDC140; PAX3	7	9	546
345	2	229044020	229047590	SPHKAP	5	8	714
346	2	233214546	233218476	ECEL1P3	8	8	786
347	2	233282329	233286929	AC068134.5; AC068134.6	7	15	920
348	2	233349365	233353148	ECEL1	7	11	757
349	2	234295280	234298039	DGKD; AC019221.4	5	5	552
350	2	240229452	240231892	MIR4269; HDAC4	5	5	488
351	2	241078766	241081464	OTOS	5	7	540
352	2	241495830	241498599	DUSP28; ANKMY1	5	12	554
353	20	17207109	17210845	PCSK2	7	12	747
354	20	19865743	19868145	RIN2	6	6	480
355	20	21682478	21685417	PAX1	5	7	588
356	20	21684834	21687282	PAX1	8	14	490
357	20	25063806	25066553	VSX1	5	9	549
358	20	25128126	25130562	RP4-738P15.1	9	17	487
359	20	30072399	30075041	REM1; LINC00028	5	8	528
360	20	35168539	35170886	MYL9; RP5-977B1.7	6	9	469
361	20	43935853	43938289	RBPJL; MATN4	5	10	487
362	20	44097223	44100675	WFDC2; AL031663.1	7	12	690
363	20	45438769	45441346	AL031055.1	5	6	515
364	20	57088461	57091317	APCDD1L-AS1; APCDD1L	5	10	571
365	20	57874094	57877125	EDN3	10	12	606
366	20	61296564	61300190	SLCO4A1; RP11-93B14.5	9	9	725
367	21	34391029	34394668	AP000282.2	6	8	728
368	21	34394093	34402798	OLIG2; AP000282.2	29	32	1741
369	21	38075709	38080019	SIM2; AP000697.6	10	14	862
370	21	38079526	38084099	SIM2	6	12	915
371	21	42217551	42220299	DSCAM	7	10	550
372	21	42687468	42690051	FAM3B	6	12	517
373	21	46873243	46876417	COL18A1	5	7	635
374	21	47715443	47719080	YBEY; C21orf58	6	7	727
375	22	18592362	18594816	PEX26; TUBA8	5	11	491
376	22	19745368	19748140	TBX1	5	7	554
377	22	23521341	23523511	BCR; BCRP8	6	10	434
378	22	24978254	24980755	SNRPD3; GGT1; FAM211B	8	8	500
379	22	31217227	31220085	OSBP2	5	6	572
380	22	31534981	31538064	PLA2G3	6	9	617
381	22	38713001	38715466	CSNK1E	5	13	493
382	22	41762093	41764512	TEF	10	11	484
383	22	45607492	45609713	KIAA0930	5	12	444
384	22	46448430	46450821	RP6-109B7.5; RP6-109B7.3; FLJ27365; C22orf26; RP6-109B7.2	6	12	478
385	22	46479891	46483023	FLJ27365	9	12	626
386	22	50450054	50452414	IL17REL; TTLL8	5	6	472
387	22	50584216	50586427	MOV10L1	7	8	442
388	22	50746014	50748878	PLXNB2; DENND6B	5	6	573
389	3	6901824	6906031	GRM7	6	12	841
390	3	13112959	13116168	IQSEC1	5	11	642
391	3	26662593	26667060	LRRC3B; AC099754.1	10	18	893
392	3	27763810	27767382	EOMES	9	15	714
393	3	38034601	38037060	VILL	5	7	492
394	3	42304063	42307974	CCK	5	22	782
395	3	42946481	42949169	RP11-141M3.5; KRBOX1; ZNF662	6	11	538
396	3	46606599	46609179	LRRC2	6	10	516
397	3	48631484	48634144	COL7A1; UQCRC1	6	13	532
398	3	49169496	49172343	LAMB2	7	9	569
399	3	50377407	50379611	ZMYND10-AS1; RASSF1; ZMYND10	7	14	441
400	3	51739741	51742473	TEX264; GRM2	6	7	546
401	3	73672231	73675702	PDZRN3-AS1; PDZRN3	7	16	694
402	3	79814639	79818232	ROBO1	6	11	719
403	3	111716793	111719245	TAGLN3	5	11	490
404	3	112358488	112360935	CCDC80	6	9	489
405	3	119378414	119381012	POPDC2; COX17	5	6	520
406	3	126112454	126114918	CCDC37; RP11-71E19.5	8	12	493
407	3	127174552	127177257		5	11	541
408	3	128293769	128296134	C3orf27	5	8	473
409	3	129406365	129408548	TMCC1	5	6	437
410	3	137478436	137481853	SOX14	5	8	683
411	3	160821268	160824318	NMD3; B3GALNT1	5	13	610
412	3	170302286	170305045	CLDN11; SLC7A14	5	16	552
413	3	183992571	183995242	EIF2B5; ECE2	8	12	534
414	3	191047308	191049439	CCDC50; UTS2B	5	9	426
415	3	192443985	192446594	FGF12; RNU1-20P	5	10	522
416	4	205232	207877	ZNF876P	5	12	529
417	4	618162	620392	PDE6B	5	12	446
418	4	643572	646551	PDE6B; RP11-1191J2.2	6	12	596
419	4	994849	998012	IDUA	7	10	633
420	4	1204359	1207150	SPON2; CTBP1	6	7	558
421	4	1395306	1403434	NKX1-1	19	23	1626
422	4	1406052	1409557		5	11	701
423	4	3370236	3373123	RGS12	7	11	577
424	4	3872127	3875143		5	7	603
425	4	5020084	5022328	CYTL1	8	12	449
426	4	8593413	8595857	GPR78; CPZ	5	8	489
427	4	9782059	9784623	DRD5; SLC2A9	8	13	513
428	4	13528102	13531948		10	14	769
429	4	41749362	41752830	RP11-227F19.1; RP11-227F19.2; PHOX2B	5	12	694
430	4	41879440	41882933	LINC00682; RP11-457P14.5	9	19	699
431	4	77340841	77343550	CCDC158	5	7	542
432	4	83673615	83676797	SCD5; MIR575	6	6	636
433	4	113440703	113443804	RP11-402J6.1	6	10	620
434	4	114212574	114215449	ANK2	5	7	575
435	4	154124439	154126681	TRIM2	5	10	448
436	4	158140936	158144917	GRIA2	5	15	796
437	4	187474891	187477703	RP11-215A19.2; MTNR1A	5	15	562
438	4	190937265	190941723	RNA5SP174; RNA5SP175; DUX4L9	9	11	892
439	5	190486	192628	PLEKHG4B; LRRC14B	6	12	428
440	5	397758	400887	AHRR	5	9	626
441	5	496520	499425	SLC9A3	5	7	581
442	5	522430	525941	RP11-310P5.2; SLC9A3	7	11	702
443	5	849745	852892	ZDHHC11; BRD9	8	9	629
444	5	1551688	1554224	CTD-2245E15.3	5	8	507
445	5	1878525	1881310	IRX4	6	8	557
446	5	32712112	32715525	NPR3	5	9	683
447	5	34042140	34044509	RP11-1084J3.4; C1QTNF3	6	7	474
448	5	37836463	37840407	GDNF-AS1; GDNF	8	20	789
449	5	44387596	44390406	FGF10-AS1; FGF10	6	10	562
450	5	63255926	63258941	RP11-158J3.2; HTR1A	9	14	603
451	5	71013761	71016162	CARTPT	5	10	480
452	5	76931016	76934224	OTP	5	7	642
453	5	78984425	78987111	PAPD4; CMYA5	11	11	537
454	5	87438075	87442654		9	13	916
455	5	87966728	87970213	CTC-467M3.1; LINC00461	5	13	697
456	5	87972439	87975464	CTC-467M3.1; LINC00461	5	12	605
457	5	102200490	102202890	PAM	5	6	480
458	5	115296488	115300646	AQPEP	10	14	832
459	5	131591959	131595335	PDLIM4; P4HA2	7	12	675
460	5	131990491	131993455	IL13; AC004041.2	5	6	593
461	5	134912559	134916085	CTC-321K16.1; CXCL14	5	9	705
462	5	145712607	145715097	RBM27; CTC-359M8.1	7	8	498
463	5	145719805	145723909	RBM27; POU4F3; CTC-359M8.1	8	10	821
464	5	149568501	149571189	SLC6A7	6	10	538
465	5	149978572	149981674	SYNPO	6	7	620
466	5	151303547	151306143	GLRA1	7	16	519
467	5	161272853	161277001	GABRA1	10	18	830
468	5	161493500	161496049	GABRG2	5	12	510
469	5	170738853	170741870	TLX3	6	12	603
470	5	170741118	170745407	TLX3	8	9	858
471	5	170762642	170765152		5	8	502
472	5	172304927	172307136	ERGIC1	5	6	442
473	5	172654948	172657713	RPL7AP33; NKX2-5	6	8	553
474	5	172660132	172663328	NKX2-5	5	13	639
475	5	176169374	176172236	RP11-375B1.3	6	10	572
476	5	177410528	177413718	RP11-1252I4.2	6	11	638
477	5	178420711	178423415	GRM6; RP11-281O15.5	7	10	541
478	5	180016195	180019722	SCGB3A1	14	15	705
479	5	180525995	180528697	FOXO1B	5	5	540
480	5	180540897	180543581	CTB-14A14.2	5	13	537
481	6	1634578	1636847	GMDS	6	6	454
482	6	10554808	10557523	GCNT2	5	5	543
483	6	10880891	10885891	SYCP2L; RP11-637O19.3; RP11-637O19.2; GCM2	11	21	1000
484	6	15503844	15507085	JARID2	8	9	648
485	6	26270227	26274556	HIST1H2BI; HIST1H3G; HIST1H2APS4	14	20	866
486	6	26756706	26759750		6	7	609
487	6	27773969	27776964	HIST1H4PS1; HIST1H2AI; HIST1H3H; HIST1H2BL	7	13	599
488	6	28983341	28985874		8	21	507
489	6	29854347	29856473	HLA-H; HCG4P7	5	37	425
490	6	29973251	29976416	HLA-J; ZNRD1-AS1; HCG4P3	7	47	633
491	6	30093960	30096802		17	28	568
492	6	30180529	30183186	TRIM26	10	50	531
493	6	30417581	30420373		9	31	558
494	6	30689213	30691712	TUBB; XXbac-BPG252P9.9	5	38	500
495	6	30719108	30721491	RN7SL353P	5	5	477
496	6	31630762	31633541	C6orf47-AS1; Y_RNA; CSNK2B; CSNK2B-LY6G5B-1181; C6orf47; GPANK1	8	48	556
497	6	31732889	31735580	MSH5; MSH5-SAPCD1; SAPCD1; SAPCD1-AS1; VWA7	10	21	538
498	6	31837528	31840025	SLC44A4	5	15	499
499	6	31912250	31915265	C2; CFB	6	20	603
500	6	32012699	32016297	TNXB	18	46	720
501	6	32047632	32050376	TNXB; RNA5SP206	7	23	549
502	6	32076744	32079624	TNXB; ATF6B	6	17	576
503	6	32117399	32119457	PPT2; PPT2-EGFL8; PRRT1	5	17	412
504	6	32163503	32165801	GPSM3; NOTCH4	8	47	460
505	6	32941494	32945067	BRD2; XXbac-BPG181M17.6	8	15	715
506	6	33046944	33049760	HLA-DPB1; RPL32P1; HLA-DPA1	15	28	563
507	6	33395160	33397405	SYNGAP1	8	20	449
508	6	34522925	34525290	SPDEF	5	8	473
509	6	35478350	35481129	TULP1	5	9	556
510	6	37502610	37505484	RP1-153P14.8	5	7	575
511	6	50673399	50676674		6	6	655
512	6	50689590	50693605	TFAP2D	7	9	803
513	6	50802820	50805174	TFAP2B	5	5	471
514	6	76202530	76204675	FILIP1	5	7	429
515	6	85473087	85475585	TBX18	5	13	500
516	6	100052930	100055615	PRDM13	6	16	537
517	6	100893513	100898081	SIM1	10	18	914
518	6	100900371	100903470	SIM1	5	6	620
519	6	100904587	100907895	SIM1	5	9	662
520	6	100910240	100912949	SIM1	8	16	542
521	6	117583596	117586815	VGLL2	5	12	644
522	6	138865865	138868080	NHSL1	5	5	443
523	6	146349131	146352044	GRM1	7	14	583
524	6	150258601	150261358	RP11-244K5.6; ULBP2	5	5	551
525	6	150345497	150348012	RAET1L	8	11	503
526	6	151645312	151648133	AKAP12	10	11	564
527	6	152701330	152703660	SYNE1-AS1; SYNE1	6	6	466
528	6	154359344	154361894	OPRM1	5	8	510
529	6	168415740	168418743	KIF25	5	16	601
530	6	168784355	168786970		6	8	523
531	6	169652612	169655018	THBS2	8	11	481
532	7	750331	753456	PRKAR1B	9	20	625
533	7	1021213	1024156	CYP2W1	8	10	589
534	7	1249088	1251519		10	18	486
535	7	1282255	1287149		8	15	979
536	7	2652733	2655530	IQCE	5	7	559
537	7	6198437	6201140	USP42; CYTH3	5	9	541
538	7	12609124	12611833	SCIN; AC005281.2	7	16	542
539	7	29604624	29607349	PRR15; AC007255.8	6	9	545
540	7	30789683	30793301	INMT; INMT-FAM188B	5	6	724
541	7	30950272	30952498	AQP1	8	13	445
542	7	73440538	73443531	ELN	8	10	599
543	7	73893573	73896278	GTF2IRD1	6	7	541
544	7	96625151	96629435	DLX6-AS1	8	15	857
545	7	100074304	100076506	TSC22D4	5	6	440
546	7	102552045	102554457	LRRC17; FBXL13	6	7	482
547	7	105318437	105320819	ATXN7L1	6	8	476
548	7	121941915	121946445	FEZF1-AS1; FEZF1	6	24	906
549	7	128576819	128579755	IRF5	9	13	587
550	7	135432540	135434790	FAM180A	7	9	450
551	7	136552243	136555731	CHRM2; hsa-mir-490	7	19	698
552	7	137027165	137029617	PTN; AC078842.3	6	10	490
553	7	150496065	150499205	TMEM176A; TMEM176B	11	14	628
554	7	150743274	150746680	ABCB8; ASIC3	7	12	681
555	7	154000891	154003372	DPP6	5	8	496
556	7	155173129	155176340	AC008060.7	8	8	642
557	7	155251201	155253944	EN2; AC008060.8	6	7	549
558	7	155282140	155284817	CNPY1	5	10	535
559	7	156808644	156816030	MNX1-AS1	20	25	1477
560	7	157360564	157363062	PTPRN2	5	7	500
561	8	22083861	22086417	PHYHIP	5	8	511
562	8	23558839	23561590	NKX2-6	5	5	550
563	8	23561918	23566098	RP11-175E9.1; NKX2-6	16	16	836
564	8	23565799	23568941	RP11-175E9.1; NKX2-6	7	8	628
565	8	26720736	26724365	ADRA1A	7	12	726
566	8	37822292	37825529	ADRB3	8	13	647
567	8	41166113	41169001	SFRP1	6	19	578
568	8	42063673	42067228	PLAT	6	7	711
569	8	50821195	50824173	SNTG1; RP11-401N18.1	6	9	596
570	8	55293566	55295882		5	5	463
571	8	57357130	57361586	RP11-17A4.2; PENK	10	25	891
572	8	143866942	143869136	RP11-706C16.8; LY6D	6	17	439
573	8	144119335	144121681	C8orf31	5	7	469
574	8	144652570	144654975	RP11-661A12.9; MROH6; NAPRT1	5	8	481
575	8	145023929	145026760	PLEC	8	15	566
576	8	145727138	145730537	PPP1R16A; GPT; CTD-2517M22.14; CTD-2517M14.5	15	21	680
577	8	145924258	145926767	AF186192.5; AF186192.1	5	7	502
578	9	973533	976997	DMRT3	5	9	693
579	9	96713295	96716843	RP11-231K24.2; BARX1	7	11	710
580	9	135460935	135466030	BARHL1; DDX31	8	11	1019

## Sheet: EC_mNSvstype.I.TE-HYPER-TE
	chr	start.bp.no.wd	end.bp.no.wd	gene.symbol	nr.diff.probes	nr.probes	window.bp
1	1	48448748	48451218	TRABD2B	5	6	494
2	1	161007462	161009824	RP11-544M22.13; TSTD1; USF1	5	11	472
3	12	19556038	19558343	AEBP2	5	5	461
4	12	52213320	52216216	RP11-923I11.6; RP11-923I11.4; RP11-923I11.7	5	8	579
5	15	96893509	96896542	RP11-522B15.3	5	6	607
6	16	54969523	54974579	IRX5; CTD-3032H12.2; CTD-3032H12.1	8	19	1011
7	17	66254210	66256666	AMZ2; ARSG	5	8	491
8	3	181427280	181429563	SOX2-OT; SOX2	5	21	457
9	4	4866102	4869723	MSX1	5	19	724
10	4	188952092	188954969		6	7	575
11	5	134825244	134828512		5	10	654
12	6	28583035	28585172	SCAND3	12	18	427
13	6	32818911	32821201	PSMB9; TAP1	5	33	458
14	6	41527395	41529785	FOXP4	6	9	478
15	7	95024611	95027097	PON1; PON3	11	22	497
16	X	11774676	11778744	MSL3	12	17	814
17	X	12808216	12811444	PRPS2	8	12	646
18	X	13670259	13672632	TCEANC	5	13	475
19	X	14890338	14892453	MOSPD2; FANCB	6	10	423
20	X	15352254	15355150	PIGA	8	11	579
21	X	15510430	15512773	BMX; PIR	9	10	469
22	X	16963684	16965808	REPS2	5	12	425
23	X	18442256	18445361	CDKL5	5	8	621
24	X	19001006	19004035	PHKA2	8	13	606
25	X	19360727	19363342	PDHA1	6	9	523
26	X	19532340	19534577	MAP3K15	7	11	447
27	X	23684407	23686984	PRDX4	5	8	515
28	X	23760412	23762492	ACOT9	5	13	416
29	X	23800067	23802656	Y_RNA; SAT1; RP13-314C10.5	5	11	518
30	X	23924746	23927141	CXorf58; APOO	6	14	479
31	X	24664458	24666932	PCYT1B-AS1; PCYT1B	6	11	495
32	X	30670090	30672787	GK	8	11	539
33	X	30905829	30908780	TAB3	10	15	590
34	X	38185399	38187919	TM4SF2; RPGR	8	12	504
35	X	41781196	41783695	CASK	7	10	500
36	X	45708881	45712234	RP5-1158E12.3	5	5	671
37	X	46305474	46307863	KRBOX4	5	10	478
38	X	46403859	46406123	ZNF674-AS1; ZNF674	7	15	453
39	X	47003051	47006131	RBM10; NDUFB11	14	19	616
40	X	47048948	47051296	UBA1	8	12	470
41	X	47076361	47078986	UBA1; CDK16	8	14	525
42	X	47340898	47343498	CXorf24; ZNF41	6	13	520
43	X	47419348	47421742	ARAF	8	12	479
44	X	47508941	47511405	ELK1; UXT	5	9	493
45	X	47517114	47519769	UXT-AS1; UXT	10	15	531
46	X	47694789	47697333	ZNF81	7	10	509
47	X	48333335	48335621	FTSJ1	5	13	457
48	X	48396760	48399133	TBC1D25	6	14	475
49	X	48658624	48661813	HDAC6	8	9	638
50	X	48753200	48756706	PQBP1; TIMM17B	16	25	701
51	X	48767927	48770380	SLC35A2; PIM2	6	18	491
52	X	48774820	48777812	PIM2; OTUD5	6	12	598
53	X	48813580	48816822	OTUD5; RNU6-722P; KCND1	11	17	648
54	X	48857587	48859921	GRIPAP1	5	10	467
55	X	48899769	48902405	TFE3	5	9	527
56	X	48957025	48959423	WDR45	6	15	480
57	X	49055661	49057711	SYP-AS1; SYP; AF196779.1	5	9	410
58	X	49686028	49688792	CLCN5	6	14	553
59	X	51074126	51077119	NUDT10	5	13	599
60	X	53460213	53462540	RIBC1; HSD17B10; RP3-339A18.6	7	12	465
61	X	54069176	54072365	PHF8	7	9	638
62	X	54208370	54210968	FAM120C	6	7	520
63	X	54465697	54468052	TSR2	6	11	471
64	X	67717299	67720066	YIPF6	9	10	553
65	X	69351975	69354812	IGBP1	7	10	567
66	X	70314657	70317670	FOXO4	6	9	603
67	X	70472929	70475783	ZMYM3	8	17	571
68	X	71129538	71132703	NHSL2	5	7	633
69	X	71932616	71935394	PHKA1-AS1; PHKA1	6	9	556
70	X	73511004	73514464	FTX	7	9	692
71	X	77150042	77152316	MAGT1	10	12	455
72	X	77153732	77155996	COX7B	5	8	453
73	X	77358363	77361510	PGK1	9	16	629
74	X	100602678	100605147	TIMM8A; BTK	8	17	494
75	X	102468889	102471223	BEX4	5	10	467
76	X	102940669	102943485	MORF4L2-AS1; MORF4L2	6	12	563
77	X	103410244	103412709	FAM199X	6	9	493
78	X	105853952	105856218	CXorf57	5	10	453
79	X	106958609	106961378	TSC22D3	5	11	554
80	X	107333429	107335934	ATG4A; PSMD10	5	10	501
81	X	109244514	109247372	TMEM164	6	11	572
82	X	109559744	109562549	AMMECR1	7	13	561
83	X	110923355	110926018	ALG13	6	11	533
84	X	117628163	117631565	DOCK11	8	11	680
85	X	118369148	118371461	PGRMC1	5	14	463
86	X	118601187	118604301	SLC25A5; SLC25A5-AS1	5	11	623
87	X	118706913	118710227	UBE2A	8	13	663
88	X	118738824	118741514	NKRF	5	7	538
89	X	118825802	118828369	2014-09-06	5	11	513
90	X	118924442	118927253	RPL39	9	11	562
91	X	118985581	118988251	UPF3B	10	12	534
92	X	119004413	119006989	NDUFA1; RNF113A	10	15	515
93	X	119076171	119078820	NKAP	7	11	530
94	X	119736620	119739402	MCTS1	9	14	556
95	X	119762815	119765469	C1GALT1C1	6	9	531
96	X	123092616	123096692	STAG2; RP1-315G1.3	6	9	815
97	X	129113666	129117500	BCORL1	7	14	767
98	X	129298788	129301230	AIFM1	7	12	488
99	X	133592973	133595827	HPRT1	7	11	571
100	X	134047490	134050419	MOSPD1; RNU6-616P	6	11	586
101	X	134476590	134480056	ZNF449; ZNF75D	10	16	693
102	X	135066436	135069018	SLC9A6	5	12	516
103	X	135577793	135581098	BRS3; HTATSF1	13	19	661
104	X	135961199	135964051	RBMX; SNORD61	6	13	570
105	X	135990334	135993020	RP11-308D16.4	6	6	537
106	X	146992092	146995166	FMR1; FMR1-AS1	7	12	615
107	X	147581041	147584309	AFF2; AC002368.4	8	15	654
108	X	148712279	148714678	TMEM185A	5	13	480
109	X	149735729	149738755	MTM1	5	10	605
110	X	149860694	149862947	MTMR1	5	10	451
111	X	150150572	150154136	HMGB3	13	15	713
112	X	151998239	152000649	NSDHL; CETN2	7	11	482
113	X	152065328	152067708		5	7	476
114	X	152734637	152737387	TREX2; HAUS7	6	11	550
115	X	153058444	153061166	SSR4; IDH3G	10	14	544
116	X	153093947	153097506	PDZD4	6	10	712
117	X	153199189	153201906	ARHGAP4; NAA10; RENBP	5	10	543
118	X	153235083	153239133	HCFC1-AS1; TMEM187; HCFC1	14	18	810
119	X	153361589	153364369	MECP2	6	13	556
120	X	153606129	153608806	EMD	5	11	535
121	X	153625455	153628317	RPL10; SNORA70; DNASE1L1	7	17	572
122	X	153717920	153720406	BX664739.1; SLC10A3	6	11	497
123	X	153743384	153745915	FAM3A; WI2-89031B12.1	6	12	506
124	X	153773927	153777107	IKBKG; G6PD	13	18	636
125	X	153978233	153980635	GAB3	5	12	480
126	X	153989874	153992165	DKC1	6	10	458
127	X	154253823	154256950	FUNDC2; F8	6	12	625
128	X	154298274	154300794	BRCC3; CMC4; MTCP1	5	9	504

## Sheet: SE_DGvsSS-HYPER-SE_DG
	chr	start.bp.no.wd	end.bp.no.wd	gene.symbol	nr.diff.probes	nr.probes	window.bp
1	1	869791	873235	SAMD11	7	11	689
2	1	1002126	1004755	RP11-465B22.3; RNF223	5	9	526
3	1	1227011	1231440	SCNN1D; ACAP3	10	14	886
4	1	1373310	1377051	VWA1	6	10	748
5	1	2124114	2126243	AL590822.2; C1orf86	6	9	426
6	1	2235443	2240065	SKI	13	18	924
7	1	2344333	2346475	PEX10	7	17	428
8	1	2770846	2773664		6	6	564
9	1	2927145	2930594		5	7	690
10	1	3027230	3030070	PRDM16	11	12	568
11	1	3156480	3160208	PRDM16	8	10	746
12	1	3181620	3185704	PRDM16	9	11	817
13	1	3558559	3560966	WRAP73	5	8	481
14	1	3773858	3776334	DFFB; CEP104	5	11	495
15	1	4220331	4223311		5	6	596
16	1	6529615	6532813	PLEKHG5	7	11	640
17	1	10731333	10734030	CASZ1	7	15	539
18	1	15270830	15273238	KAZN	5	6	482
19	1	16269657	16272762	ZBTB17	6	11	621
20	1	16859563	16863212	FAM231B; U1	5	8	730
21	1	19663276	19666757	CAPZB	7	8	696
22	1	22776266	22778839	ZBTB40	5	11	515
23	1	23762279	23764782	ASAP3	5	7	501
24	1	27188298	27191639	SFN	8	13	668
25	1	27960680	27963021	FGR	5	12	468
26	1	32740152	32743037	LCK	5	7	577
27	1	33230070	33232382	KIAA1522	8	8	462
28	1	36642743	36645849	MAP7D1	5	7	621
29	1	38019399	38022830	RP3-423B22.5; DNALI1; SNIP1	5	26	686
30	1	40024232	40027202	PPIEL; PABPC4	5	7	594
31	1	40348633	40351052	TRIT1; Y_RNA	5	11	484
32	1	41302356	41305435	KCNQ4	5	6	616
33	1	42383310	42385647	HIVEP3	5	9	467
34	1	46086792	46091169	NASP; CCDC17; GPBP1L1	8	10	875
35	1	86046239	86048911	CYR61; DDAH1; RP11-290M5.4	5	15	534
36	1	86080443	86083316		6	6	575
37	1	154126138	154129002	NUP210L; TPM3	7	8	573
38	1	178454607	178457270		5	5	533
39	1	178992784	178995355	FAM20B	5	12	514
40	1	200840646	200843282	GPR25	5	9	527
41	1	205496713	205499551	CDK18	5	6	568
42	1	205817956	205820609	PM20D1	8	9	531
43	1	221056236	221059198	HLX	6	8	592
44	1	221067171	221070136		6	11	593
45	1	223565278	223567794	C1orf65	7	12	503
46	10	5405423	5408119	UCN3	10	11	539
47	10	11910449	11913597	PROSER2; PROSER2-AS1	5	5	630
48	10	18548413	18551223	CACNB2; RP11-109I13.2	5	11	562
49	10	18628497	18630677	CACNB2	5	8	436
50	10	21796661	21799698		6	11	607
51	10	50505748	50508298	C10orf71; C10orf71-AS1	8	10	510
52	10	50648666	50651248	RP11-123B3.2	5	5	516
53	10	63808073	63810170	ARID5B	5	5	419
54	10	75490470	75494387	GLUD1P3; DUSP8P5; RP11-464F9.1; RP11-574K11.28; BMS1P4	6	7	783
55	10	76802270	76804925	DUPD1	5	5	531
56	10	77164750	77167684	ZNF503-AS2; RP11-399K21.14; RP11-399K21.13	5	11	587
57	10	77870618	77873458	C10orf11	7	8	568
58	10	81965990	81968666	LINC00857; ANXA11	5	5	535
59	10	93803898	93806870	CPEB3	8	8	594
60	10	105231723	105234423	CALHM3	5	6	540
61	10	118562175	118564859		5	9	537
62	10	127461344	127465762	MMP21	11	15	884
63	10	130827579	130830645		5	9	613
64	10	131842517	131846025		10	10	702
65	10	131986192	131990849		12	14	931
66	10	133795348	133798327	BNIP3	6	11	596
67	10	134060662	134063614	STK32C	6	7	590
68	10	134565316	134568309	INPP5A	6	11	599
69	10	134592236	134594761	INPP5A; RP11-288G11.3	5	8	505
70	10	134595302	134598358	INPP5A; RP11-288G11.3; NKX6-2	5	12	611
71	11	610791	614478	PHRF1; IRF7; CDHR5	5	12	737
72	11	626582	629677	CDHR5; SCT	8	11	619
73	11	1480925	1484291	BRSK2	6	13	673
74	11	1768152	1770443	IFITM10; RP11-295K3.1	5	11	458
75	11	2291890	2294305	ASCL2	14	37	483
76	11	2422043	2424586	TSSC4; AC124057.5; TRPM5	9	35	509
77	11	3252581	3255452	AC109309.4; MRGPRE	8	14	574
78	11	8831907	8834095	RP11-318C2.1; ST5	5	11	438
79	11	18476153	18478753	LDHAL6A	9	9	520
80	11	57518282	57520470	TMX2-CTNND1; RP11-691N7.6; CTNND1; BTBD18	5	9	438
81	11	62456014	62458345	LRRN4CL; BSCL2; HNRNPUL2-BSCL2	6	8	466
82	11	62473725	62476078	GNG3; BSCL2; HNRNPUL2-BSCL2	6	12	471
83	11	63675370	63678197	MARK2; RCOR2	5	6	565
84	11	63751561	63754210	AP000721.4; OTUB1	5	11	530
85	11	64134674	64140406	RPS6KA4; MIR1237	15	18	1146
86	11	64950536	64953034	CAPN1; AP003068.23	5	6	500
87	11	65304575	65308006	SCYL1; LTBP3	5	7	686
88	11	65358521	65361509	EHBP1L1; AP001362.1; KCNK7	6	6	598
89	11	65373663	65376704	MAP3K11	7	7	608
90	11	65413099	65416260	SIPA1; MIR4489	5	5	632
91	11	65683313	65686787	DRAP1; C11orf68	5	16	695
92	11	66624106	66628706	LRFN4; PC	11	19	920
93	11	67259414	67263714	AIP; PITPNM1	8	10	860
94	11	67417106	67419365	ACY3; AP003385.2	9	12	452
95	11	69284633	69287293	AP000439.5	5	7	532
96	11	70671388	70673878	SHANK2	8	11	498
97	11	94277324	94280068	PIWIL4; FUT4; RP11-867G2.8	9	10	549
98	11	94769418	94772514	RP11-60C6.5; RP11-60C6.6	5	5	619
99	11	118841230	118844000	Y_RNA; FOXR1	10	11	554
100	11	120037190	120040029	AP000679.2; TRIM29	6	12	568
101	11	128556589	128560399	FLI1; RP11-744N12.3; SENCR	6	16	762
102	11	131778750	131781094	NTM	6	19	469
103	12	246261	250286	IQSEC3; RP11-598F7.4	7	9	805
104	12	2337945	2340614	CACNA1C	5	6	534
105	12	5935877	5938409	ANO2	5	5	506
106	12	52214972	52218558	RP11-923I11.6; RP11-923I11.4; RP11-923I11.7	7	10	717
107	12	52694270	52696568	KRT86	5	7	460
108	12	52994070	52996446	RP11-641A6.2; KRT72	6	10	475
109	12	122710988	122713925	DIABLO; RP11-512M8.5; VPS33A	10	12	587
110	12	123756070	123759853	CDK2AP1	8	16	757
111	12	124807992	124810934	NCOR2	7	9	588
112	12	125001332	125004407	RP11-83B20.1; NCOR2	8	10	615
113	12	130501003	130503586		7	10	517
114	12	130820453	130825403	PIWIL1	15	16	990
115	12	132602220	132604990	EP400NL	6	7	554
116	12	132999028	133001830		6	8	560
117	12	133018977	133022135		6	13	632
118	12	133157791	133162907	FBRSL1	8	12	1023
119	12	133166806	133170908		7	10	820
120	13	20750257	20752945	PPIAP28	5	6	538
121	13	21899392	21901854	LINC00422	5	7	492
122	13	23308892	23311464		5	8	514
123	13	27331979	27334986	GPR12	5	8	601
124	13	30726927	30729819	LINC00385; LINC00384	5	5	578
125	13	41495235	41497979	TPTE2P5; SUGT1P3	5	12	549
126	13	98827625	98831116	FARP1; RNF113B	10	14	698
127	13	100216995	100220013	TM9SF2	5	5	604
128	13	101172617	101175420	PCCA	7	7	561
129	13	110395942	110399293		5	6	670
130	13	110432636	110437780	IRS2	9	13	1029
131	13	111521651	111523985	LINC00346	6	9	467
132	13	112330836	112333213		5	10	475
133	13	112506773	112509206		6	9	487
134	13	112608986	112611918		5	11	586
135	13	112625684	112629792		6	8	822
136	13	112629296	112632009		5	9	543
137	13	112873202	112875850		5	8	530
138	13	112978932	112981703	LINC01044	5	9	554
139	13	112983478	112987285	LINC01044	9	15	761
140	13	112995049	112998643		8	10	719
141	13	113409966	113412977	ATP11A; ATP11A-AS1	8	12	602
142	13	113538207	113541557	ATP11A; AL356740.1	5	7	670
143	13	113703976	113707721	MCF2L	8	11	749
144	13	113712970	113716159	MCF2L	7	9	638
145	13	114839698	114844624	RASA3	8	15	985
146	14	20902410	20905020	RP11-203M5.6; KLHL33	8	10	522
147	14	21557656	21562590	ARHGEF40; RP11-998D10.7; ZNF219	10	11	987
148	14	93697216	93700254	UBR7	7	8	608
149	14	95329880	95332466		5	5	517
150	14	97090489	97093150		5	6	532
151	14	101002657	101006680	CTD-2062F14.3; BEGAIN	6	9	805
152	14	101191190	101193860	DLK1	9	19	534
153	14	101289556	101292469	MEG3	9	23	583
154	14	102049490	102052071		5	5	516
155	14	102694264	102696875	MOK	7	7	522
156	14	103387656	103390966	AMN	7	9	662
157	14	103592088	103594995	TNFAIP2	6	11	581
158	14	104799568	104802102		5	5	507
159	14	105165740	105169639	INF2	9	10	780
160	14	105450249	105452561	C14orf79	5	9	462
161	14	105712866	105715400	BTBD6; BRF1	5	9	507
162	14	105944287	105947891	CRIP2	5	9	721
163	15	27110440	27112884	GABRA5; GABRB3	5	23	489
164	15	31514750	31517481	RP11-16E12.1; RP11-16E12.2	8	9	546
165	15	40570997	40574976	RP11-133K1.2; PAK6; PLCB2; ANKRD63	7	10	796
166	15	41058627	41061394	GCHFR; C15orf62; DNAJC17	7	8	553
167	15	65368005	65370928	KBTBD13; RASL12	6	8	585
168	15	67456767	67459398	SMAD3	5	8	526
169	15	80542353	80544685	RP11-2E17.1	5	8	466
170	15	82333984	82337202	AC026956.1; MEX3B	5	8	644
171	15	90189822	90193724	KIF7	8	9	780
172	15	99407636	99410506	IGF1R	7	9	574
173	16	280115	282424	Z69890.1; ITFG3; LUC7L	5	5	462
174	16	730772	734280	RHBDL1; STUB1; LA16c-313D11.9; JMJD8; WDR24	5	11	702
175	16	935480	939327	LA16c-306A4.1; LMF1	6	8	769
176	16	1092274	1096865		5	11	918
177	16	1114517	1117397	RP11-161M6.5; SSTR5-AS1; AC009041.1	5	8	576
178	16	1812796	1815481	MAPK8IP3	5	8	537
179	16	1842915	1846113	SPSB3; IGFALS; HAGH	8	15	640
180	16	2139326	2142745	TSC2; RP11-304L19.1; PKD1; MIR1225; RP11-304L19.3	6	6	684
181	16	2847409	2850144	PRSS41; SNORA3	6	10	547
182	16	2865901	2869001	PRSS21	6	7	620
183	16	2901608	2904392	PRSS22	6	6	557
184	16	3016593	3019470	KREMEN2; PAQR4; PKMYT1	6	12	575
185	16	4310628	4315246	TFAP4	9	9	924
186	16	4728905	4731657	MGRN1	5	5	550
187	16	8805359	8808043	ABAT	9	9	537
188	16	8984638	8988215	USP7	5	6	715
189	16	19125242	19128305	ITPRIPL2; CTD-2349B8.1	5	6	613
190	16	29818931	29821592	KIF22; MAZ; PRRT2; AC009133.15; AC009133.14; AC009133.20	5	11	532
191	16	30904768	30908679	MIR4519; MIR762; CTF1; BCL7C; AC106782.20	6	20	782
192	16	49731376	49734377	ZNF423	5	6	600
193	16	66598843	66601700	CKLF; CKLF-CMTM1; CMTM1	10	10	571
194	16	66833571	66837048	CCDC79; NAE1	8	11	695
195	16	67231557	67234983	E2F4; ELMO3; MIR328	7	11	685
196	16	67681005	67684817	RLTPR	7	8	762
197	16	67694670	67697204	PARD6A; ACD; ENKD1	9	22	507
198	16	68012968	68015374	DPEP3	5	7	481
199	16	70712203	70715606	MTSS1L	7	7	681
200	16	71474279	71476926	RP11-510M2.8	5	5	529
201	16	72458595	72461114	AC004158.3; AC004158.2	6	7	504
202	16	73264937	73267785	AC140912.1	5	6	570
203	16	75146500	75151456	ZNRF1; RP11-252E2.2; RP11-252E2.1; LDHD	8	14	991
204	16	81742671	81745554	CMIP	5	5	577
205	16	84223564	84226080	ADAD2; RP11-486L19.2	5	7	503
206	16	85606562	85609934		8	10	674
207	16	86793539	86796490		5	7	590
208	16	87100534	87103691	RP11-134D3.2	10	13	631
209	16	87522700	87526539	RP11-482M8.1; ZCCHC14	5	6	768
210	16	87738377	87741757	KLHDC4; FLJ00104	6	14	676
211	16	87758400	87762016	KLHDC4	5	6	723
212	16	88597320	88601155	ZFPM1; RP11-21B21.4	6	6	767
213	17	1395074	1398079	MYO1C; INPP5K	5	8	601
214	17	6337181	6340302	AIPL1	8	12	624
215	17	6897738	6901356	ALOX12; AC027763.2; RP11-589P10.7; RP11-589P10.5	13	16	724
216	17	7310030	7313041	NLGN2; TMEM256	7	8	602
217	17	7491352	7494710	MPDU1; SOX15; FXR2	5	8	672
218	17	7753956	7760140	KDM6B; TMEM88; CYB5D1; LSMD1	15	31	1237
219	17	14212447	14215081	HS3ST3B1	5	8	527
220	17	17108936	17111353	MPRIP; PLD6; RP11-45M22.4	5	14	483
221	17	17602531	17605184	RAI1	6	6	531
222	17	17711609	17715414	RAI1; SREBF1; MIR33B	8	8	761
223	17	19770548	19773177	ULK2	5	10	526
224	17	46626484	46631630	HOXB-AS1; HOXB-AS3; HOXB-AS2; HOXB3	13	14	1029
225	17	46650186	46652920	HOXB-AS3; HOXB3; HOXB4	7	12	547
226	17	46670861	46674002	HOXB-AS3; HOXB3; HOXB5; HOXB6	5	20	628
227	17	47112061	47114596	IGF2BP1; RNU6-826P; RP11-501C14.7	6	7	507
228	17	48910141	48913764	WFIKKN2	16	23	725
229	17	56768387	56770767	RAD51C; TEX14	8	14	476
230	17	60756134	60759287	MRC2; RNU6-446P	6	7	631
231	17	61513690	61516312	CYB561	5	6	524
232	17	75522478	75525350	RP11-13K12.2	6	11	574
233	17	76036035	76038562	TNRC6C	6	6	505
234	17	76226227	76228508	TMEM235	5	11	456
235	17	76986812	76990965	CANT1	8	11	831
236	17	77806201	77809999	CBX4	5	9	760
237	17	77996453	77998997	CTD-2529O21.2; TBC1D16	5	7	509
238	17	78193695	78196518	SLC26A11; SGSH	5	13	565
239	17	79092482	79097582	BAIAP2; MIR338; AATK; MIR657	8	14	1020
240	17	79182386	79184966	AZI1	5	5	516
241	17	79376272	79379207	RP11-1055B8.6; RP11-1055B8.7; MIR4740	5	6	587
242	17	80327607	80331415	UTS2R	5	12	762
243	17	80544020	80546705	FOXK2; RP13-638C3.3	9	12	537
244	18	5890602	5893753	RP11-945C19.4; TMEM200C	6	9	630
245	18	13610370	13612489	LDLRAD4; MIR4526	5	7	424
246	18	19475805	19478059	RP11-268I9.3	5	6	451
247	18	56527679	56530866	ZNF532	6	10	637
248	18	60050870	60053464	TNFRSF11A	5	5	519
249	18	74798250	74801029	MBP	6	8	556
250	18	77155876	77159676	NFATC1	6	8	760
251	18	77291063	77293947	NFATC1	5	5	577
252	18	77375639	77379261		6	6	724
253	18	77607384	77610786		5	6	680
254	19	290986	293271	PPAP2C	8	16	457
255	19	405407	409233	C2CD4C	6	9	765
256	19	851311	854540	ELANE	5	7	646
257	19	1006843	1012150	GRIN3B; TMEM259	11	16	1061
258	19	1106911	1110252	GPX4; SBNO2	5	5	668
259	19	1225523	1232292	STK11; C19orf26	14	14	1354
260	19	2036662	2039600	BTBD2; MKNK2	5	5	588
261	19	3461653	3466071	NFIC	9	11	884
262	19	3480788	3484428	C19orf77	5	7	728
263	19	4036609	4039956	PIAS4; AC016586.1	7	8	669
264	19	4044025	4047108	AC016586.1; ZBTB7A	6	6	617
265	19	4046755	4049427	ZBTB7A	5	5	534
266	19	4454316	4456957	CTB-50L17.9; UBXN6; CTB-50L17.16	5	5	528
267	19	4474009	4476216	HDGFRP2; AC011498.1	5	7	441
268	19	6474456	6478198	DENND1C	7	7	748
269	19	7503512	7506344	CTD-2207O23.3; ARHGEF18	7	8	566
270	19	7583241	7586086	CTD-2207O23.12; ZNF358; MCOLN1; CTD-2207O23.11	5	6	569
271	19	7613864	7617011	PNPLA6	6	6	629
272	19	8562373	8565224	PRAM1	5	6	570
273	19	10419263	10421441	ZGLP1; FDX1L; CTD-2369P2.10	7	9	436
274	19	10462037	10466257	TYK2	7	7	844
275	19	14071358	14075823	DCAF15; RFX1	7	8	893
276	19	14223992	14226172	PRKACA	5	9	436
277	19	15082616	15085527	SLC1A6	5	10	582
278	19	15283853	15286108	NOTCH3	5	6	451
279	19	18760132	18762792	KLHL26	6	6	532
280	19	19624264	19627428	NDUFA13; YJEFN3; CTC-260F20.3; TSSK6	5	18	633
281	19	19638568	19641075	NDUFA13; YJEFN3; CTC-260F20.3	5	5	501
282	19	19646899	19649890	YJEFN3; CTC-260F20.3; CILP2	5	12	598
283	19	21539536	21542358	ZNF738	5	11	564
284	19	31639194	31641849	AC020952.1	8	9	531
285	19	33621600	33624230	GPATCH1; WDR88	10	14	526
286	19	36434543	36437010	LRFN3; AF038458.3	5	5	493
287	19	36483731	36486360	SDHAF1	6	12	526
288	19	38875094	38878220	PSMD8; AC005789.9; SPRED3; GGN	5	7	625
289	19	39736768	39740555	IFNL3; IFNL4	7	8	757
290	19	44004808	44007432	PHLDB3	5	5	525
291	19	44038345	44040870	ZNF575	6	7	505
292	19	45865874	45868461	ERCC2	5	6	517
293	19	46213108	46217471	FBXO46	6	7	873
294	19	46805907	46808660	HIF3A; RNU6-924P	6	7	551
295	19	48203530	48207119	CTD-2571L23.8; GLTSCR1	5	5	718
296	19	48673746	48676305	C19orf68; ZNF114; LIG1	5	8	512
297	19	49827347	49829833	SLC6A16	7	8	497
298	19	49840458	49844160	CD37; CTC-301O7.4; TEAD2	5	9	740
299	19	50057328	50061306	NOSIP	7	9	796
300	19	50362877	50367381	PTOV1; AC018766.5; AC018766.4; PNKP	6	7	901
301	19	50390064	50392885	TBC1D17; MIR4750; IL4I1	5	5	564
302	19	54494381	54497611	CACNG8; CACNG6	6	9	646
303	19	55991744	55996851	ZNF628; NAT14; SSC5D	8	15	1021
304	19	55996780	55999931	ZNF628; NAT14; SSC5D	6	6	630
305	19	56088012	56091781	CTD-2537I9.5; ZNF579	6	7	754
306	19	56597342	56601361	ZNF787	6	6	804
307	19	57701324	57703500	ZNF264	7	26	435
308	19	58594668	58598097	ZNF135; ZSCAN18	5	6	686
309	19	58714251	58717517	ZNF274	8	8	653
310	19	58860502	58863398	A1BG-AS1; A1BG; CTD-2619J13.8; ZNF497	6	6	579
311	2	393115	395572	AC105393.1	5	6	491
312	2	465712	468135		7	9	485
313	2	3451347	3453624	TRAPPC12	6	9	455
314	2	3641098	3643967	COLEC11	9	11	574
315	2	24396539	24399695	RP11-507M3.1; FAM228A; AC008073.7	10	11	631
316	2	43294011	43296753		5	7	548
317	2	43327033	43329536	AC093609.1	5	6	501
318	2	47381427	47383739	C2orf61; RP11-761B3.1	6	7	462
319	2	54085854	54088552	GPR75-ASB3; ASB3; GPR75	14	14	540
320	2	71786615	71789134	DYSF	5	6	504
321	2	88582529	88584845		5	6	463
322	2	91775322	91779264	AC116050.1	6	7	788
323	2	97172713	97176065	NEURL3	7	17	670
324	2	99437242	99440997	KIAA1211L	7	8	751
325	2	105852157	105855051		7	8	579
326	2	109745735	109748264	SH3RF3; SH3RF3-AS1	6	11	506
327	2	129249637	129252945		5	6	662
328	2	131672406	131675687	ARHGEF4	5	13	656
329	2	157183137	157185978	NR4A2	7	12	568
330	2	209223225	209226183	PIKFYVE; PTH2R; AC012362.3	6	8	592
331	2	223915502	223919000	KCNE4	7	12	700
332	2	231853570	231857059	SPATA3-AS1	6	7	698
333	2	233250770	233254378	ECEL1P2	5	6	722
334	2	238706009	238709555	LRRFIP1; RBM44	7	14	709
335	2	239034964	239038533	ESPNL	5	6	714
336	2	239929734	239932250	RP11-648F7.1	5	6	503
337	2	240398084	240400738		5	5	531
338	2	241075583	241078066	MYEOV2; OTOS	5	25	497
339	2	241261258	241264067		8	10	562
340	2	242662858	242667066	ING5; AC114730.11	8	11	842
341	2	242842030	242845174	AC131097.3; AC131097.4	6	12	629
342	2	242886938	242890699	AC131097.3	5	12	752
343	20	5450695	5452900	RP5-828H9.1; LINC00658	5	9	441
344	20	5484144	5486511	RP5-1022P6.7; LINC00654; RP5-1022P6.4	5	8	473
345	20	30070726	30074546	REM1; LINC00028	8	11	764
346	20	30224517	30226851	COX4I2	6	8	467
347	20	36147264	36150455	NNAT; BLCAP	27	40	638
348	20	36156405	36158764	PPIAP3; BLCAP	6	35	472
349	20	55903633	55905875	RP3-481F12.1; SPO11	6	11	448
350	20	57040489	57043703	APCDD1L	5	6	643
351	20	57413162	57415407	GNAS; GNAS-AS1; RP4-806M20.3	5	19	449
352	20	62569397	62573875	DNAJC5; UCKL1; MIR1914; MIR647	7	8	896
353	20	62714942	62717606	OPRL1; C20orf201	5	10	533
354	20	62794658	62797417	MYT1	9	12	552
355	21	34349407	34352148	AP000282.2	7	7	548
356	21	45704429	45707101	AIRE	8	12	534
357	21	46676482	46679524	LINC00334	5	5	608
358	21	47559127	47563057	FTCD	5	5	786
359	22	22900145	22903237	LL22NC03-63E9.3; PRAME	10	13	618
360	22	24889330	24892666	UPB1; ADORA2A-AS1	9	13	667
361	22	29705704	29709647	GAS2L1; RASL10A	7	10	789
362	22	30475089	30477452	HORMAD2; CTA-85E5.10	10	10	473
363	22	31362807	31365349	TUG1; MORC2	5	8	508
364	22	38478099	38480708	SLC16A8; BAIAP2L2	8	10	522
365	22	42547153	42550153	CYP2D8P	6	6	600
366	22	50527179	50530698	MOV10L1	9	14	704
367	22	50613877	50618822	PANX2	6	10	989
368	22	50984117	50988527	CTA-384D8.34; CTA-384D8.31; KLHDC7B; CTA-384D8.35; SYCE3	6	12	882
369	22	51157550	51160995	SHANK3	5	6	689
370	3	10148803	10151083	FANCD2OS	7	10	456
371	3	11745183	11748650	VGLL4	6	6	693
372	3	13859204	13861812	WNT7A	5	5	522
373	3	16923563	16926533	PLCL2	5	11	594
374	3	32508018	32510212	CMTM7	5	8	439
375	3	46758096	46760698	PRSS50; PRSS46	7	9	520
376	3	113159071	113161821	WDR52; SPICE1	9	10	550
377	3	125676491	125679407	RP11-666A20.3	5	8	583
378	3	133501540	133503952	SRPRB	6	7	482
379	3	141494400	141497003	GRK7	6	11	521
380	3	142680015	142682704	RP11-372E1.7; RP11-372E1.6; U2SURP; PAQR9	5	11	538
381	3	148803720	148806709	HLTF-AS1; HLTF	14	24	598
382	3	183958000	183960465	EIF2B5; VWA5B2; MIR1224; ALG3	5	11	493
383	3	195488306	195491309	MUC4	8	11	601
384	3	196692809	196696320	PIGZ	6	7	702
385	4	735398	740962	PCGF3	10	15	1113
386	4	896587	899773	GAK	5	8	637
387	4	1040044	1043225		5	6	636
388	4	1165767	1168650	SPON2	11	19	577
389	4	1200315	1204653	SPON2; CTBP1	19	21	868
390	4	1242849	1246565	CTBP1-AS2; CTBP1	9	15	743
391	4	1341161	1344273	UVSSA	5	11	622
392	4	1503654	1506838		8	11	637
393	4	1511820	1514259		6	8	488
394	4	1593181	1596726		8	9	709
395	4	1979206	1982090	WHSC1; NELFA	6	7	577
396	4	1993281	1996036	NELFA	6	9	551
397	4	2276349	2279594	ZFYVE28	5	14	649
398	4	3249690	3251921	MSANTD1	6	12	446
399	4	4862874	4865430	MSX1	6	16	511
400	4	7798191	7800701	AFAP1	5	5	502
401	4	26490963	26493488	CCKAR	7	8	505
402	4	39446968	39449464	KLB	5	10	499
403	4	39770851	39774308	UBE2K; ZBTB12P1	7	9	691
404	4	41879440	41882933	LINC00682; RP11-457P14.5	6	19	699
405	4	183727479	183730343		5	8	573
406	4	184907254	184910018	STOX2; RP11-739P1.2	7	7	553
407	4	186731837	186734428	SORBS2	6	11	518
408	5	1461612	1465321	LPCAT1	9	9	742
409	5	1465132	1469749	LPCAT1	12	14	923
410	5	2111260	2113561		5	7	460
411	5	2168371	2171490		7	7	624
412	5	3324150	3327444		6	11	659
413	5	37834506	37837119	GDNF	6	17	523
414	5	43036123	43038666	CTD-2035E11.4; CTD-2201E18.3; ANXA2R	6	7	509
415	5	43043573	43046001	AC025171.1; CTD-2201E18.3; ANXA2R	5	6	486
416	5	55031703	55035148	DDX4; SLC38A9	6	9	689
417	5	67584399	67587928	PIK3R1	5	5	706
418	5	112823614	112825920	MCC	5	9	461
419	5	115696214	115698696	COMMD10	5	5	496
420	5	131280112	131282574	AC034228.4; ACSL6; AC034228.7	5	7	492
421	5	138712750	138715654	SLC23A1	7	8	581
422	5	140050861	140054460	WDR55; DND1; HARS	7	11	720
423	5	140479218	140481967	PCDHB2; PCDHB3; AC005754.7	7	14	550
424	5	140682196	140685561	SLC25A2	11	13	673
425	5	149545073	149548566	CDX1	8	12	699
426	5	154068670	154071385		5	7	543
427	5	157077082	157080520	SOX30	7	11	688
428	5	158521427	158524907	RP11-175K6.1; EBF1	5	7	696
429	5	172109211	172112778	NEURL1B	6	6	713
430	5	176917190	176920739	RP11-1334A24.6; PDLIM7	5	9	710
431	5	177029568	177032502	B4GALT7	6	6	587
432	5	179562200	179565602	RASGEF1C	8	12	680
433	5	180045528	180049893	FLT4	9	12	873
434	5	180621072	180623643	CTC-338M12.5; CTC-338M12.6; CTC-338M12.2; TRIM7	5	5	514
435	5	180645608	180649409	TRIM41; MIR4638; CTC-338M12.7	10	14	760
436	6	1522751	1525618		6	8	573
437	6	1593034	1597254		11	12	844
438	6	1614843	1618377	FOXC1	5	8	707
439	6	2509144	2511637		5	5	499
440	6	4077943	4080649	snoU13; C6orf201; FAM217A	8	10	541
441	6	7141024	7143638	RREB1	5	9	523
442	6	16216067	16219683		5	8	723
443	6	26017534	26021421	HIST1H1PS2; HIST1H3A; HIST1H4A; HIST1H1A	5	16	777
444	6	26106687	26109404	HIST1H4C; HIST1H1T	6	8	543
445	6	26224539	26227256	HIST1H3E	5	10	543
446	6	26245843	26248270	HIST1H4G; HIST1H3F	7	8	485
447	6	28828283	28831310	RPL13P; XXbac-BPG308K3.6	22	37	605
448	6	28982143	28985234		5	25	618
449	6	29923067	29925299	HLA-W	6	14	446
450	6	30037712	30040025	PPP1R11; RNF39	15	40	463
451	6	30139325	30141417	TRIM15	5	23	418
452	6	30289258	30293755	TRIM39; HCG17; HCG18	6	23	899
453	6	30683278	30685406	MDC1-AS1; MDC1	5	31	426
454	6	30685511	30687922	TUBB; MDC1	5	16	482
455	6	31147332	31149666	POU5F1; PSORS1C3	13	15	467
456	6	31694970	31697729	C6orf25; DDAH2; CLIC1	22	42	552
457	6	31865508	31870120	C2; EHMT2; ZBTB12	28	81	922
458	6	31869600	31871990	C2; ZBTB12	6	20	478
459	6	31937527	31940085	SKIV2L; STK19; DXO	13	45	512
460	6	32053771	32056068	TNXB	7	29	459
461	6	32063810	32066034	TNXB; ATF6B	5	46	445
462	6	32095716	32098507	ATF6B; FKBPL	9	62	558
463	6	32116377	32119315	PPT2; PPT2-EGFL8; PRRT1	6	37	588
464	6	32163585	32166237	GPSM3; NOTCH4	9	46	530
465	6	32373926	32376447	BTNL2	5	9	504
466	6	33127903	33131034	COL11A2	11	30	626
467	6	33244619	33247390	RPS18; B3GALT4; WDR46	12	56	554
468	6	33282189	33286075	TAPBP; ZBTB22; DAXX	16	66	777
469	6	33383179	33385490	PHF1; SYNGAP1; CUTA	6	24	462
470	6	34497714	34500504	PACSIN1	6	6	558
471	6	42926629	42928993	GNMT; RPL24P4	6	32	473
472	6	43021044	43023213	KLC4; CUL7; MRPL2	5	9	434
473	6	43477455	43479829	POLR1C; LRRC73; YIPF3	7	10	475
474	6	90595366	90598394	RP11-63K6.5	6	9	606
475	6	138744349	138746739	HEBP2; NHSL1	5	5	478
476	6	149770845	149773892	ZC3H12D	6	7	609
477	6	160219721	160223116	MRPL18; PNLDC1	11	15	679
478	6	163729368	163732903	PACRG	5	12	707
479	6	166099251	166101650	PDE10A	5	6	480
480	6	168119635	168123963		7	15	866
481	6	168375134	168380113	MLLT4; RP3-470B24.5	17	18	996
482	6	169284077	169288304		8	14	845
483	6	170448858	170452590		5	9	746
484	6	170489375	170493847	RP11-302L19.3	5	6	894
485	6	170588483	170592088	RP5-894D12.3; RP5-894D12.5; DLL1	7	15	721
486	7	751624	753800	PRKAR1B	5	15	435
487	7	806608	810078	HEATR2	6	10	694
488	7	1079473	1082709	AC073957.15; GPR146; C7orf50	6	9	647
489	7	1313422	1316866		5	7	689
490	7	2294998	2299727	SNX8	6	9	946
491	7	5425831	5430036	TNRC18	5	5	841
492	7	5645477	5649122	FSCN1	10	13	729
493	7	6692838	6696121	ZNF316; RP11-611L7.1	5	9	657
494	7	27183125	27185271	HOXA-AS3; HOXA3; RP1-170O19.22; HOXA5; HOXA6; RP1-170O19.23	6	44	429
495	7	44151238	44154500	AEBP1; MIR4649; POLD2	7	9	652
496	7	44613305	44615519	DDX56; TMED4	5	9	443
497	7	45001112	45003919	RP4-647J21.1; MYO1G	5	6	561
498	7	47091254	47094015	AC004870.5; AC004901.1; AC004870.3	5	6	552
499	7	50848168	50851564	GRB10	5	7	679
500	7	55515436	55518538	VOPP1	7	7	620
501	7	56241072	56243554	RP4-725G10.4	5	8	496
502	7	73440538	73443531	ELN	5	10	599
503	7	75955931	75958902	YWHAG	5	12	594
504	7	92671484	92674015		5	6	506
505	7	100169610	100173231	RP11-44M6.3; SAP25; LRCH4	9	10	724
506	7	114054074	114056419	FOXP2; AC073626.2	5	8	469
507	7	127909494	127912367		5	6	575
508	7	130129122	130132869	MEST	28	54	749
509	7	144099630	144102769	NOBOX	5	5	628
510	7	148920808	148924218	ZNF282	9	12	682
511	7	149127171	149131015	ZNF777	8	10	769
512	7	149568715	149571071	ATP6V0E2; ATP6V0E2-AS1	5	17	471
513	7	150036297	150040342	LRRC61; RP4-584D14.7; RARRES2	5	10	809
514	7	150777818	150780710	AGAP3; FASTK; TMUB1	10	24	578
515	7	150818554	150821714	AGAP3	5	7	632
516	7	151825950	151830209	YBX1P4; KMT2C	9	18	852
517	7	152590099	152593038		7	12	588
518	7	155622690	155625308		5	7	524
519	7	157200622	157204490	DNAJB6	7	11	774
520	7	157548667	157552024	PTPRN2	7	13	671
521	7	157807584	157810596	PTPRN2	7	8	602
522	7	158747055	158751417	WDR60	7	13	872
523	8	1047486	1050477	ERICH1-AS1	5	13	598
524	8	1363458	1366906		8	10	690
525	8	6636707	6639123		6	7	483
526	8	8747536	8750494	MFHAS1	5	8	592
527	8	22131563	22134375	PIWIL2; CTD-2530N21.4	12	15	562
528	8	28927948	28930689	CTD-2647L4.5; KIF13B	5	8	548
529	8	38507024	38509780		5	6	551
530	8	41503890	41506495	NKX6-3	5	11	521
531	8	42035781	42039135	PLAT	5	8	671
532	8	42267294	42270559		7	8	653
533	8	48171283	48173992	SPIDR	5	12	542
534	8	53325305	53328079	ST18	6	7	555
535	8	61833373	61836708	AC022182.1	8	10	667
536	8	74196678	74199210		5	5	506
537	8	97344492	97347037	PTDSS1	5	6	509
538	8	105378392	105380985	DPYS	5	6	519
539	8	124217573	124220699	FAM83A; FAM83A-AS1	6	12	625
540	8	143858669	143860990	LYNX1	6	13	464
541	8	143915017	143917377	GML; RP11-706C16.5	5	10	472
542	8	145161483	145164102	MAF1; KIAA1875; SHARPIN	6	10	524
543	8	145848073	145850886	ARHGAP39	5	9	563
544	8	145937564	145940778	AF186192.6	6	6	643
545	9	34369820	34373821	KIAA1161	7	8	800
546	9	131153899	131157065	URM1; RP11-339B21.11; MIR219-2	5	7	633
547	9	136073886	136076868		5	5	596
548	9	139835323	139839089	C8G; FBXW5	6	13	753
549	9	140172549	140176219	TOR4A	5	10	734
550	9	140725863	140730712	EHMT1; MIR602	7	8	970
551	X	39865161	39868548	AC092198.1	6	9	677
552	X	70271769	70274384		5	6	523
553	X	70796476	70799610	OGT; ACRC	8	8	627
554	X	100545517	100548965	TAF7L; Y_RNA	6	16	690
555	X	102583953	102586202	TCEAL7	5	7	450
556	X	118283520	118286064	KIAA1210	5	13	509
557	X	133678545	133681974	LINC00629; MIR503HG; MIR503	9	13	686
558	X	152759034	152761248	BGN; HAUS7	5	9	443
559	X	153068926	153071352	PDZD4	5	7	485

## Sheet: SE_DGvsSS-HYPER-SS
	chr	start.bp.no.wd	end.bp.no.wd	gene.symbol	nr.diff.probes	nr.probes	window.bp
1	1	206315396	206318854	CTSE	5	7	692
2	10	49891861	49894463	WDFY4	7	14	520
3	10	114133878	114137011	ACSL5	9	13	627
4	11	124766801	124769015	ROBO4	5	11	443
5	12	70082090	70084213	BEST3	5	7	425
6	12	128849196	128851903	TMEM132C	6	7	541
7	14	75987356	75990203	BATF	6	9	569
8	15	33358788	33361271	FMN1	5	7	497
9	15	40598680	40601635	PLCB2	5	7	591
10	17	6658070	6660562	XAF1	7	10	498
11	17	62096918	62099230	ICAM2	5	5	462
12	19	39825668	39827927	GMFG	6	9	452
13	19	51669315	51671666	SIGLEC17P; CTD-3187F8.14	5	7	470
14	19	52003992	52006188	SIGLEC12; CTD-3073N11.7	6	10	439
15	2	231279698	231282474	SP100	6	9	555
16	22	37639250	37641514	RAC2	6	7	453
17	3	11057836	11060010	SLC6A1; SLC6A1-AS1	5	6	435
18	3	46447496	46450313	CCRL2; RP11-24F11.2	7	12	563
19	6	29625990	29628845	MOG	7	12	571
20	6	29931621	29934971		6	9	670
21	6	31700944	31705774	MSH5; MSH5-SAPCD1; DDAH2; CLIC1	14	28	966
22	6	31743612	31745918	VWA7; VARS; Y_RNA	5	26	461
23	6	32075147	32078103	TNXB; ATF6B	5	17	591
24	6	33035958	33038662	HLA-DPA1	6	16	541
25	6	33038481	33042406	HLA-DPB1; HLA-DPA1	8	18	785
26	6	33546969	33549425	GGNBP1; BAK1	6	10	491
27	6	35264379	35266759	ZNF76; DEF6	9	12	476
28	6	149804995	149807732	ZC3H12D	9	10	547
29	7	100768903	100771476	SERPINE1	5	10	515
30	7	140102726	140105086	RAB19; SLC37A3	6	9	472

## Sheet: SE_DGvstype.I.TE-HYPER-SE_DG
	chr	start.bp.no.wd	end.bp.no.wd	gene.symbol	nr.diff.probes	nr.probes	window.bp
1	12	125001007	125004558	RP11-83B20.1; NCOR2	10	11	710
2	17	6898207	6900758	ALOX12; AC027763.2; RP11-589P10.7; RP11-589P10.5	10	15	510
3	2	233250770	233254378	ECEL1P2	5	6	722

## Sheet: recurrent DMRs tumors
	gene.symbol	n.dmr.lists	n.total.occurences	details
1	RP11-923I11.6	2	2	; EC_mNSvstype.I.TEhypermethylated_type.I.TE-n=1; EC_mNSvstype.I.TEhypermethylated_EC_mNS-n=0; SE_DGvsSShypermethylated_SE_DG-n=1; SE_DGvsSShypermethylated_SS-n=0; SE_DGvstype.I.TEhypermethylated_SE_DG-n=0
2	RP11-923I11.4	2	2	; EC_mNSvstype.I.TEhypermethylated_type.I.TE-n=1; EC_mNSvstype.I.TEhypermethylated_EC_mNS-n=0; SE_DGvsSShypermethylated_SE_DG-n=1; SE_DGvsSShypermethylated_SS-n=0; SE_DGvstype.I.TEhypermethylated_SE_DG-n=0
3	RP11-923I11.7	2	2	; EC_mNSvstype.I.TEhypermethylated_type.I.TE-n=1; EC_mNSvstype.I.TEhypermethylated_EC_mNS-n=0; SE_DGvsSShypermethylated_SE_DG-n=1; SE_DGvsSShypermethylated_SS-n=0; SE_DGvstype.I.TEhypermethylated_SE_DG-n=0
4	MSX1	2	2	; EC_mNSvstype.I.TEhypermethylated_type.I.TE-n=1; EC_mNSvstype.I.TEhypermethylated_EC_mNS-n=0; SE_DGvsSShypermethylated_SE_DG-n=1; SE_DGvsSShypermethylated_SS-n=0; SE_DGvstype.I.TEhypermethylated_SE_DG-n=0
5	Y_RNA	4	6	; EC_mNSvstype.I.TEhypermethylated_type.I.TE-n=1; EC_mNSvstype.I.TEhypermethylated_EC_mNS-n=1; SE_DGvsSShypermethylated_SE_DG-n=3; SE_DGvsSShypermethylated_SS-n=1; SE_DGvstype.I.TEhypermethylated_SE_DG-n=0
6	UBA1	1	2	; EC_mNSvstype.I.TEhypermethylated_type.I.TE-n=2; EC_mNSvstype.I.TEhypermethylated_EC_mNS-n=0; SE_DGvsSShypermethylated_SE_DG-n=0; SE_DGvsSShypermethylated_SS-n=0; SE_DGvstype.I.TEhypermethylated_SE_DG-n=0
7	UXT	1	2	; EC_mNSvstype.I.TEhypermethylated_type.I.TE-n=2; EC_mNSvstype.I.TEhypermethylated_EC_mNS-n=0; SE_DGvsSShypermethylated_SE_DG-n=0; SE_DGvsSShypermethylated_SS-n=0; SE_DGvstype.I.TEhypermethylated_SE_DG-n=0
8	PIM2	1	2	; EC_mNSvstype.I.TEhypermethylated_type.I.TE-n=2; EC_mNSvstype.I.TEhypermethylated_EC_mNS-n=0; SE_DGvsSShypermethylated_SE_DG-n=0; SE_DGvsSShypermethylated_SS-n=0; SE_DGvstype.I.TEhypermethylated_SE_DG-n=0
9	OTUD5	1	2	; EC_mNSvstype.I.TEhypermethylated_type.I.TE-n=2; EC_mNSvstype.I.TEhypermethylated_EC_mNS-n=0; SE_DGvsSShypermethylated_SE_DG-n=0; SE_DGvsSShypermethylated_SS-n=0; SE_DGvstype.I.TEhypermethylated_SE_DG-n=0
10	HAUS7	2	2	; EC_mNSvstype.I.TEhypermethylated_type.I.TE-n=1; EC_mNSvstype.I.TEhypermethylated_EC_mNS-n=0; SE_DGvsSShypermethylated_SE_DG-n=1; SE_DGvsSShypermethylated_SS-n=0; SE_DGvstype.I.TEhypermethylated_SE_DG-n=0
11	PDZD4	2	2	; EC_mNSvstype.I.TEhypermethylated_type.I.TE-n=1; EC_mNSvstype.I.TEhypermethylated_EC_mNS-n=0; SE_DGvsSShypermethylated_SE_DG-n=1; SE_DGvsSShypermethylated_SS-n=0; SE_DGvstype.I.TEhypermethylated_SE_DG-n=0
12	TTLL10	1	2	; EC_mNSvstype.I.TEhypermethylated_type.I.TE-n=0; EC_mNSvstype.I.TEhypermethylated_EC_mNS-n=2; SE_DGvsSShypermethylated_SE_DG-n=0; SE_DGvsSShypermethylated_SS-n=0; SE_DGvstype.I.TEhypermethylated_SE_DG-n=0
13	TTLL10-AS1	1	2	; EC_mNSvstype.I.TEhypermethylated_type.I.TE-n=0; EC_mNSvstype.I.TEhypermethylated_EC_mNS-n=2; SE_DGvsSShypermethylated_SE_DG-n=0; SE_DGvsSShypermethylated_SS-n=0; SE_DGvstype.I.TEhypermethylated_SE_DG-n=0
14	VWA1	2	2	; EC_mNSvstype.I.TEhypermethylated_type.I.TE-n=0; EC_mNSvstype.I.TEhypermethylated_EC_mNS-n=1; SE_DGvsSShypermethylated_SE_DG-n=1; SE_DGvsSShypermethylated_SS-n=0; SE_DGvstype.I.TEhypermethylated_SE_DG-n=0
15	AL590822.2	2	2	; EC_mNSvstype.I.TEhypermethylated_type.I.TE-n=0; EC_mNSvstype.I.TEhypermethylated_EC_mNS-n=1; SE_DGvsSShypermethylated_SE_DG-n=1; SE_DGvsSShypermethylated_SS-n=0; SE_DGvstype.I.TEhypermethylated_SE_DG-n=0
16	C1orf86	2	3	; EC_mNSvstype.I.TEhypermethylated_type.I.TE-n=0; EC_mNSvstype.I.TEhypermethylated_EC_mNS-n=2; SE_DGvsSShypermethylated_SE_DG-n=1; SE_DGvsSShypermethylated_SS-n=0; SE_DGvstype.I.TEhypermethylated_SE_DG-n=0
17	SKI	2	3	; EC_mNSvstype.I.TEhypermethylated_type.I.TE-n=0; EC_mNSvstype.I.TEhypermethylated_EC_mNS-n=2; SE_DGvsSShypermethylated_SE_DG-n=1; SE_DGvsSShypermethylated_SS-n=0; SE_DGvstype.I.TEhypermethylated_SE_DG-n=0
18	PRDM16	2	6	; EC_mNSvstype.I.TEhypermethylated_type.I.TE-n=0; EC_mNSvstype.I.TEhypermethylated_EC_mNS-n=3; SE_DGvsSShypermethylated_SE_DG-n=3; SE_DGvsSShypermethylated_SS-n=0; SE_DGvstype.I.TEhypermethylated_SE_DG-n=0
19	PLEKHG5	2	2	; EC_mNSvstype.I.TEhypermethylated_type.I.TE-n=0; EC_mNSvstype.I.TEhypermethylated_EC_mNS-n=1; SE_DGvsSShypermethylated_SE_DG-n=1; SE_DGvsSShypermethylated_SS-n=0; SE_DGvstype.I.TEhypermethylated_SE_DG-n=0
20	C1orf94	1	2	; EC_mNSvstype.I.TEhypermethylated_type.I.TE-n=0; EC_mNSvstype.I.TEhypermethylated_EC_mNS-n=2; SE_DGvsSShypermethylated_SE_DG-n=0; SE_DGvsSShypermethylated_SS-n=0; SE_DGvstype.I.TEhypermethylated_SE_DG-n=0
21	NBPF13P	1	2	; EC_mNSvstype.I.TEhypermethylated_type.I.TE-n=0; EC_mNSvstype.I.TEhypermethylated_EC_mNS-n=2; SE_DGvsSShypermethylated_SE_DG-n=0; SE_DGvsSShypermethylated_SS-n=0; SE_DGvstype.I.TEhypermethylated_SE_DG-n=0
22	LHX9	1	2	; EC_mNSvstype.I.TEhypermethylated_type.I.TE-n=0; EC_mNSvstype.I.TEhypermethylated_EC_mNS-n=2; SE_DGvsSShypermethylated_SE_DG-n=0; SE_DGvsSShypermethylated_SS-n=0; SE_DGvstype.I.TEhypermethylated_SE_DG-n=0
23	PTF1A	1	2	; EC_mNSvstype.I.TEhypermethylated_type.I.TE-n=0; EC_mNSvstype.I.TEhypermethylated_EC_mNS-n=2; SE_DGvsSShypermethylated_SE_DG-n=0; SE_DGvsSShypermethylated_SS-n=0; SE_DGvstype.I.TEhypermethylated_SE_DG-n=0
24	FFAR4	1	2	; EC_mNSvstype.I.TEhypermethylated_type.I.TE-n=0; EC_mNSvstype.I.TEhypermethylated_EC_mNS-n=2; SE_DGvsSShypermethylated_SE_DG-n=0; SE_DGvsSShypermethylated_SS-n=0; SE_DGvstype.I.TEhypermethylated_SE_DG-n=0
25	HUG1	1	2	; EC_mNSvstype.I.TEhypermethylated_type.I.TE-n=0; EC_mNSvstype.I.TEhypermethylated_EC_mNS-n=2; SE_DGvsSShypermethylated_SE_DG-n=0; SE_DGvsSShypermethylated_SS-n=0; SE_DGvstype.I.TEhypermethylated_SE_DG-n=0
26	TLX1NB	1	2	; EC_mNSvstype.I.TEhypermethylated_type.I.TE-n=0; EC_mNSvstype.I.TEhypermethylated_EC_mNS-n=2; SE_DGvsSShypermethylated_SE_DG-n=0; SE_DGvsSShypermethylated_SS-n=0; SE_DGvstype.I.TEhypermethylated_SE_DG-n=0
27	LBX1-AS1	1	2	; EC_mNSvstype.I.TEhypermethylated_type.I.TE-n=0; EC_mNSvstype.I.TEhypermethylated_EC_mNS-n=2; SE_DGvsSShypermethylated_SE_DG-n=0; SE_DGvsSShypermethylated_SS-n=0; SE_DGvstype.I.TEhypermethylated_SE_DG-n=0
28	HMX2	1	2	; EC_mNSvstype.I.TEhypermethylated_type.I.TE-n=0; EC_mNSvstype.I.TEhypermethylated_EC_mNS-n=2; SE_DGvsSShypermethylated_SE_DG-n=0; SE_DGvsSShypermethylated_SS-n=0; SE_DGvstype.I.TEhypermethylated_SE_DG-n=0
29	INPP5A	2	4	; EC_mNSvstype.I.TEhypermethylated_type.I.TE-n=0; EC_mNSvstype.I.TEhypermethylated_EC_mNS-n=1; SE_DGvsSShypermethylated_SE_DG-n=3; SE_DGvsSShypermethylated_SS-n=0; SE_DGvstype.I.TEhypermethylated_SE_DG-n=0
30	RP11-288G11.3	2	3	; EC_mNSvstype.I.TEhypermethylated_type.I.TE-n=0; EC_mNSvstype.I.TEhypermethylated_EC_mNS-n=1; SE_DGvsSShypermethylated_SE_DG-n=2; SE_DGvsSShypermethylated_SS-n=0; SE_DGvstype.I.TEhypermethylated_SE_DG-n=0
31	NKX6-2	2	2	; EC_mNSvstype.I.TEhypermethylated_type.I.TE-n=0; EC_mNSvstype.I.TEhypermethylated_EC_mNS-n=1; SE_DGvsSShypermethylated_SE_DG-n=1; SE_DGvsSShypermethylated_SS-n=0; SE_DGvstype.I.TEhypermethylated_SE_DG-n=0
32	ASCL2	2	2	; EC_mNSvstype.I.TEhypermethylated_type.I.TE-n=0; EC_mNSvstype.I.TEhypermethylated_EC_mNS-n=1; SE_DGvsSShypermethylated_SE_DG-n=1; SE_DGvsSShypermethylated_SS-n=0; SE_DGvstype.I.TEhypermethylated_SE_DG-n=0
33	KCNQ1	1	2	; EC_mNSvstype.I.TEhypermethylated_type.I.TE-n=0; EC_mNSvstype.I.TEhypermethylated_EC_mNS-n=2; SE_DGvsSShypermethylated_SE_DG-n=0; SE_DGvsSShypermethylated_SS-n=0; SE_DGvstype.I.TEhypermethylated_SE_DG-n=0
34	SLC6A5	1	2	; EC_mNSvstype.I.TEhypermethylated_type.I.TE-n=0; EC_mNSvstype.I.TEhypermethylated_EC_mNS-n=2; SE_DGvsSShypermethylated_SE_DG-n=0; SE_DGvsSShypermethylated_SS-n=0; SE_DGvstype.I.TEhypermethylated_SE_DG-n=0
35	WT1	1	3	; EC_mNSvstype.I.TEhypermethylated_type.I.TE-n=0; EC_mNSvstype.I.TEhypermethylated_EC_mNS-n=3; SE_DGvsSShypermethylated_SE_DG-n=0; SE_DGvsSShypermethylated_SS-n=0; SE_DGvstype.I.TEhypermethylated_SE_DG-n=0
36	WT1-AS	1	2	; EC_mNSvstype.I.TEhypermethylated_type.I.TE-n=0; EC_mNSvstype.I.TEhypermethylated_EC_mNS-n=2; SE_DGvsSShypermethylated_SE_DG-n=0; SE_DGvsSShypermethylated_SS-n=0; SE_DGvstype.I.TEhypermethylated_SE_DG-n=0
37	NUMA1	1	2	; EC_mNSvstype.I.TEhypermethylated_type.I.TE-n=0; EC_mNSvstype.I.TEhypermethylated_EC_mNS-n=2; SE_DGvsSShypermethylated_SE_DG-n=0; SE_DGvsSShypermethylated_SS-n=0; SE_DGvstype.I.TEhypermethylated_SE_DG-n=0
38	AGAP2	1	2	; EC_mNSvstype.I.TEhypermethylated_type.I.TE-n=0; EC_mNSvstype.I.TEhypermethylated_EC_mNS-n=2; SE_DGvsSShypermethylated_SE_DG-n=0; SE_DGvsSShypermethylated_SS-n=0; SE_DGvstype.I.TEhypermethylated_SE_DG-n=0
39	NCOR2	3	4	; EC_mNSvstype.I.TEhypermethylated_type.I.TE-n=0; EC_mNSvstype.I.TEhypermethylated_EC_mNS-n=1; SE_DGvsSShypermethylated_SE_DG-n=2; SE_DGvsSShypermethylated_SS-n=0; SE_DGvstype.I.TEhypermethylated_SE_DG-n=1
40	PDX1	1	2	; EC_mNSvstype.I.TEhypermethylated_type.I.TE-n=0; EC_mNSvstype.I.TEhypermethylated_EC_mNS-n=2; SE_DGvsSShypermethylated_SE_DG-n=0; SE_DGvsSShypermethylated_SS-n=0; SE_DGvstype.I.TEhypermethylated_SE_DG-n=0
41	RASA3	2	2	; EC_mNSvstype.I.TEhypermethylated_type.I.TE-n=0; EC_mNSvstype.I.TEhypermethylated_EC_mNS-n=1; SE_DGvsSShypermethylated_SE_DG-n=1; SE_DGvsSShypermethylated_SS-n=0; SE_DGvstype.I.TEhypermethylated_SE_DG-n=0
42	DIO3	1	2	; EC_mNSvstype.I.TEhypermethylated_type.I.TE-n=0; EC_mNSvstype.I.TEhypermethylated_EC_mNS-n=2; SE_DGvsSShypermethylated_SE_DG-n=0; SE_DGvsSShypermethylated_SS-n=0; SE_DGvstype.I.TEhypermethylated_SE_DG-n=0
43	DIO3OS	1	2	; EC_mNSvstype.I.TEhypermethylated_type.I.TE-n=0; EC_mNSvstype.I.TEhypermethylated_EC_mNS-n=2; SE_DGvsSShypermethylated_SE_DG-n=0; SE_DGvsSShypermethylated_SS-n=0; SE_DGvstype.I.TEhypermethylated_SE_DG-n=0
44	DUOXA1	1	2	; EC_mNSvstype.I.TEhypermethylated_type.I.TE-n=0; EC_mNSvstype.I.TEhypermethylated_EC_mNS-n=2; SE_DGvsSShypermethylated_SE_DG-n=0; SE_DGvsSShypermethylated_SS-n=0; SE_DGvstype.I.TEhypermethylated_SE_DG-n=0
45	ONECUT1	1	2	; EC_mNSvstype.I.TEhypermethylated_type.I.TE-n=0; EC_mNSvstype.I.TEhypermethylated_EC_mNS-n=2; SE_DGvsSShypermethylated_SE_DG-n=0; SE_DGvsSShypermethylated_SS-n=0; SE_DGvstype.I.TEhypermethylated_SE_DG-n=0
46	SMAD3	2	2	; EC_mNSvstype.I.TEhypermethylated_type.I.TE-n=0; EC_mNSvstype.I.TEhypermethylated_EC_mNS-n=1; SE_DGvsSShypermethylated_SE_DG-n=1; SE_DGvsSShypermethylated_SS-n=0; SE_DGvstype.I.TEhypermethylated_SE_DG-n=0
47	RHBDL1	2	2	; EC_mNSvstype.I.TEhypermethylated_type.I.TE-n=0; EC_mNSvstype.I.TEhypermethylated_EC_mNS-n=1; SE_DGvsSShypermethylated_SE_DG-n=1; SE_DGvsSShypermethylated_SS-n=0; SE_DGvstype.I.TEhypermethylated_SE_DG-n=0
48	LA16c-313D11.9	2	2	; EC_mNSvstype.I.TEhypermethylated_type.I.TE-n=0; EC_mNSvstype.I.TEhypermethylated_EC_mNS-n=1; SE_DGvsSShypermethylated_SE_DG-n=1; SE_DGvsSShypermethylated_SS-n=0; SE_DGvstype.I.TEhypermethylated_SE_DG-n=0
49	SSTR5	1	2	; EC_mNSvstype.I.TEhypermethylated_type.I.TE-n=0; EC_mNSvstype.I.TEhypermethylated_EC_mNS-n=2; SE_DGvsSShypermethylated_SE_DG-n=0; SE_DGvsSShypermethylated_SS-n=0; SE_DGvstype.I.TEhypermethylated_SE_DG-n=0
50	SSTR5-AS1	2	3	; EC_mNSvstype.I.TEhypermethylated_type.I.TE-n=0; EC_mNSvstype.I.TEhypermethylated_EC_mNS-n=2; SE_DGvsSShypermethylated_SE_DG-n=1; SE_DGvsSShypermethylated_SS-n=0; SE_DGvstype.I.TEhypermethylated_SE_DG-n=0
51	SPSB3	2	2	; EC_mNSvstype.I.TEhypermethylated_type.I.TE-n=0; EC_mNSvstype.I.TEhypermethylated_EC_mNS-n=1; SE_DGvsSShypermethylated_SE_DG-n=1; SE_DGvsSShypermethylated_SS-n=0; SE_DGvstype.I.TEhypermethylated_SE_DG-n=0
52	IGFALS	2	2	; EC_mNSvstype.I.TEhypermethylated_type.I.TE-n=0; EC_mNSvstype.I.TEhypermethylated_EC_mNS-n=1; SE_DGvsSShypermethylated_SE_DG-n=1; SE_DGvsSShypermethylated_SS-n=0; SE_DGvstype.I.TEhypermethylated_SE_DG-n=0
53	HAGH	2	2	; EC_mNSvstype.I.TEhypermethylated_type.I.TE-n=0; EC_mNSvstype.I.TEhypermethylated_EC_mNS-n=1; SE_DGvsSShypermethylated_SE_DG-n=1; SE_DGvsSShypermethylated_SS-n=0; SE_DGvstype.I.TEhypermethylated_SE_DG-n=0
54	NAE1	2	2	; EC_mNSvstype.I.TEhypermethylated_type.I.TE-n=0; EC_mNSvstype.I.TEhypermethylated_EC_mNS-n=1; SE_DGvsSShypermethylated_SE_DG-n=1; SE_DGvsSShypermethylated_SS-n=0; SE_DGvstype.I.TEhypermethylated_SE_DG-n=0
55	XAF1	2	2	; EC_mNSvstype.I.TEhypermethylated_type.I.TE-n=0; EC_mNSvstype.I.TEhypermethylated_EC_mNS-n=1; SE_DGvsSShypermethylated_SE_DG-n=0; SE_DGvsSShypermethylated_SS-n=1; SE_DGvstype.I.TEhypermethylated_SE_DG-n=0
56	AC027763.2	3	3	; EC_mNSvstype.I.TEhypermethylated_type.I.TE-n=0; EC_mNSvstype.I.TEhypermethylated_EC_mNS-n=1; SE_DGvsSShypermethylated_SE_DG-n=1; SE_DGvsSShypermethylated_SS-n=0; SE_DGvstype.I.TEhypermethylated_SE_DG-n=1
57	HOXB-AS3	2	4	; EC_mNSvstype.I.TEhypermethylated_type.I.TE-n=0; EC_mNSvstype.I.TEhypermethylated_EC_mNS-n=1; SE_DGvsSShypermethylated_SE_DG-n=3; SE_DGvsSShypermethylated_SS-n=0; SE_DGvstype.I.TEhypermethylated_SE_DG-n=0
58	HOXB3	2	4	; EC_mNSvstype.I.TEhypermethylated_type.I.TE-n=0; EC_mNSvstype.I.TEhypermethylated_EC_mNS-n=1; SE_DGvsSShypermethylated_SE_DG-n=3; SE_DGvsSShypermethylated_SS-n=0; SE_DGvstype.I.TEhypermethylated_SE_DG-n=0
59	HOXB6	2	2	; EC_mNSvstype.I.TEhypermethylated_type.I.TE-n=0; EC_mNSvstype.I.TEhypermethylated_EC_mNS-n=1; SE_DGvsSShypermethylated_SE_DG-n=1; SE_DGvsSShypermethylated_SS-n=0; SE_DGvstype.I.TEhypermethylated_SE_DG-n=0
60	COL1A1	1	2	; EC_mNSvstype.I.TEhypermethylated_type.I.TE-n=0; EC_mNSvstype.I.TEhypermethylated_EC_mNS-n=2; SE_DGvsSShypermethylated_SE_DG-n=0; SE_DGvsSShypermethylated_SS-n=0; SE_DGvstype.I.TEhypermethylated_SE_DG-n=0
61	RP11-1055B8.6	2	2	; EC_mNSvstype.I.TEhypermethylated_type.I.TE-n=0; EC_mNSvstype.I.TEhypermethylated_EC_mNS-n=1; SE_DGvsSShypermethylated_SE_DG-n=1; SE_DGvsSShypermethylated_SS-n=0; SE_DGvstype.I.TEhypermethylated_SE_DG-n=0
62	RP11-1055B8.7	2	2	; EC_mNSvstype.I.TEhypermethylated_type.I.TE-n=0; EC_mNSvstype.I.TEhypermethylated_EC_mNS-n=1; SE_DGvsSShypermethylated_SE_DG-n=1; SE_DGvsSShypermethylated_SS-n=0; SE_DGvstype.I.TEhypermethylated_SE_DG-n=0
63	MIR4740	2	2	; EC_mNSvstype.I.TEhypermethylated_type.I.TE-n=0; EC_mNSvstype.I.TEhypermethylated_EC_mNS-n=1; SE_DGvsSShypermethylated_SE_DG-n=1; SE_DGvsSShypermethylated_SS-n=0; SE_DGvstype.I.TEhypermethylated_SE_DG-n=0
64	SBNO2	2	3	; EC_mNSvstype.I.TEhypermethylated_type.I.TE-n=0; EC_mNSvstype.I.TEhypermethylated_EC_mNS-n=2; SE_DGvsSShypermethylated_SE_DG-n=1; SE_DGvsSShypermethylated_SS-n=0; SE_DGvstype.I.TEhypermethylated_SE_DG-n=0
65	LINGO3	1	2	; EC_mNSvstype.I.TEhypermethylated_type.I.TE-n=0; EC_mNSvstype.I.TEhypermethylated_EC_mNS-n=2; SE_DGvsSShypermethylated_SE_DG-n=0; SE_DGvsSShypermethylated_SS-n=0; SE_DGvstype.I.TEhypermethylated_SE_DG-n=0
66	SLC1A6	2	2	; EC_mNSvstype.I.TEhypermethylated_type.I.TE-n=0; EC_mNSvstype.I.TEhypermethylated_EC_mNS-n=1; SE_DGvsSShypermethylated_SE_DG-n=1; SE_DGvsSShypermethylated_SS-n=0; SE_DGvstype.I.TEhypermethylated_SE_DG-n=0
67	NR4A2	2	2	; EC_mNSvstype.I.TEhypermethylated_type.I.TE-n=0; EC_mNSvstype.I.TEhypermethylated_EC_mNS-n=1; SE_DGvsSShypermethylated_SE_DG-n=1; SE_DGvsSShypermethylated_SS-n=0; SE_DGvstype.I.TEhypermethylated_SE_DG-n=0
68	OTOS	2	2	; EC_mNSvstype.I.TEhypermethylated_type.I.TE-n=0; EC_mNSvstype.I.TEhypermethylated_EC_mNS-n=1; SE_DGvsSShypermethylated_SE_DG-n=1; SE_DGvsSShypermethylated_SS-n=0; SE_DGvstype.I.TEhypermethylated_SE_DG-n=0
69	PAX1	1	2	; EC_mNSvstype.I.TEhypermethylated_type.I.TE-n=0; EC_mNSvstype.I.TEhypermethylated_EC_mNS-n=2; SE_DGvsSShypermethylated_SE_DG-n=0; SE_DGvsSShypermethylated_SS-n=0; SE_DGvstype.I.TEhypermethylated_SE_DG-n=0
70	REM1	2	2	; EC_mNSvstype.I.TEhypermethylated_type.I.TE-n=0; EC_mNSvstype.I.TEhypermethylated_EC_mNS-n=1; SE_DGvsSShypermethylated_SE_DG-n=1; SE_DGvsSShypermethylated_SS-n=0; SE_DGvstype.I.TEhypermethylated_SE_DG-n=0
71	LINC00028	2	2	; EC_mNSvstype.I.TEhypermethylated_type.I.TE-n=0; EC_mNSvstype.I.TEhypermethylated_EC_mNS-n=1; SE_DGvsSShypermethylated_SE_DG-n=1; SE_DGvsSShypermethylated_SS-n=0; SE_DGvstype.I.TEhypermethylated_SE_DG-n=0
72	APCDD1L	2	2	; EC_mNSvstype.I.TEhypermethylated_type.I.TE-n=0; EC_mNSvstype.I.TEhypermethylated_EC_mNS-n=1; SE_DGvsSShypermethylated_SE_DG-n=1; SE_DGvsSShypermethylated_SS-n=0; SE_DGvstype.I.TEhypermethylated_SE_DG-n=0
73	AP000282.2	2	3	; EC_mNSvstype.I.TEhypermethylated_type.I.TE-n=0; EC_mNSvstype.I.TEhypermethylated_EC_mNS-n=2; SE_DGvsSShypermethylated_SE_DG-n=1; SE_DGvsSShypermethylated_SS-n=0; SE_DGvstype.I.TEhypermethylated_SE_DG-n=0
74	SIM2	1	2	; EC_mNSvstype.I.TEhypermethylated_type.I.TE-n=0; EC_mNSvstype.I.TEhypermethylated_EC_mNS-n=2; SE_DGvsSShypermethylated_SE_DG-n=0; SE_DGvsSShypermethylated_SS-n=0; SE_DGvstype.I.TEhypermethylated_SE_DG-n=0
75	FLJ27365	1	2	; EC_mNSvstype.I.TEhypermethylated_type.I.TE-n=0; EC_mNSvstype.I.TEhypermethylated_EC_mNS-n=2; SE_DGvsSShypermethylated_SE_DG-n=0; SE_DGvsSShypermethylated_SS-n=0; SE_DGvstype.I.TEhypermethylated_SE_DG-n=0
76	MOV10L1	2	2	; EC_mNSvstype.I.TEhypermethylated_type.I.TE-n=0; EC_mNSvstype.I.TEhypermethylated_EC_mNS-n=1; SE_DGvsSShypermethylated_SE_DG-n=1; SE_DGvsSShypermethylated_SS-n=0; SE_DGvstype.I.TEhypermethylated_SE_DG-n=0
77	EIF2B5	2	2	; EC_mNSvstype.I.TEhypermethylated_type.I.TE-n=0; EC_mNSvstype.I.TEhypermethylated_EC_mNS-n=1; SE_DGvsSShypermethylated_SE_DG-n=1; SE_DGvsSShypermethylated_SS-n=0; SE_DGvstype.I.TEhypermethylated_SE_DG-n=0
78	PDE6B	1	2	; EC_mNSvstype.I.TEhypermethylated_type.I.TE-n=0; EC_mNSvstype.I.TEhypermethylated_EC_mNS-n=2; SE_DGvsSShypermethylated_SE_DG-n=0; SE_DGvsSShypermethylated_SS-n=0; SE_DGvstype.I.TEhypermethylated_SE_DG-n=0
79	SPON2	2	3	; EC_mNSvstype.I.TEhypermethylated_type.I.TE-n=0; EC_mNSvstype.I.TEhypermethylated_EC_mNS-n=1; SE_DGvsSShypermethylated_SE_DG-n=2; SE_DGvsSShypermethylated_SS-n=0; SE_DGvstype.I.TEhypermethylated_SE_DG-n=0
80	CTBP1	2	3	; EC_mNSvstype.I.TEhypermethylated_type.I.TE-n=0; EC_mNSvstype.I.TEhypermethylated_EC_mNS-n=1; SE_DGvsSShypermethylated_SE_DG-n=2; SE_DGvsSShypermethylated_SS-n=0; SE_DGvstype.I.TEhypermethylated_SE_DG-n=0
81	LINC00682	2	2	; EC_mNSvstype.I.TEhypermethylated_type.I.TE-n=0; EC_mNSvstype.I.TEhypermethylated_EC_mNS-n=1; SE_DGvsSShypermethylated_SE_DG-n=1; SE_DGvsSShypermethylated_SS-n=0; SE_DGvstype.I.TEhypermethylated_SE_DG-n=0
82	RP11-457P14.5	2	2	; EC_mNSvstype.I.TEhypermethylated_type.I.TE-n=0; EC_mNSvstype.I.TEhypermethylated_EC_mNS-n=1; SE_DGvsSShypermethylated_SE_DG-n=1; SE_DGvsSShypermethylated_SS-n=0; SE_DGvstype.I.TEhypermethylated_SE_DG-n=0
83	SLC9A3	1	2	; EC_mNSvstype.I.TEhypermethylated_type.I.TE-n=0; EC_mNSvstype.I.TEhypermethylated_EC_mNS-n=2; SE_DGvsSShypermethylated_SE_DG-n=0; SE_DGvsSShypermethylated_SS-n=0; SE_DGvstype.I.TEhypermethylated_SE_DG-n=0
84	GDNF	2	2	; EC_mNSvstype.I.TEhypermethylated_type.I.TE-n=0; EC_mNSvstype.I.TEhypermethylated_EC_mNS-n=1; SE_DGvsSShypermethylated_SE_DG-n=1; SE_DGvsSShypermethylated_SS-n=0; SE_DGvstype.I.TEhypermethylated_SE_DG-n=0
85	CTC-467M3.1	1	2	; EC_mNSvstype.I.TEhypermethylated_type.I.TE-n=0; EC_mNSvstype.I.TEhypermethylated_EC_mNS-n=2; SE_DGvsSShypermethylated_SE_DG-n=0; SE_DGvsSShypermethylated_SS-n=0; SE_DGvstype.I.TEhypermethylated_SE_DG-n=0
86	LINC00461	1	2	; EC_mNSvstype.I.TEhypermethylated_type.I.TE-n=0; EC_mNSvstype.I.TEhypermethylated_EC_mNS-n=2; SE_DGvsSShypermethylated_SE_DG-n=0; SE_DGvsSShypermethylated_SS-n=0; SE_DGvstype.I.TEhypermethylated_SE_DG-n=0
87	RBM27	1	2	; EC_mNSvstype.I.TEhypermethylated_type.I.TE-n=0; EC_mNSvstype.I.TEhypermethylated_EC_mNS-n=2; SE_DGvsSShypermethylated_SE_DG-n=0; SE_DGvsSShypermethylated_SS-n=0; SE_DGvstype.I.TEhypermethylated_SE_DG-n=0
88	CTC-359M8.1	1	2	; EC_mNSvstype.I.TEhypermethylated_type.I.TE-n=0; EC_mNSvstype.I.TEhypermethylated_EC_mNS-n=2; SE_DGvsSShypermethylated_SE_DG-n=0; SE_DGvsSShypermethylated_SS-n=0; SE_DGvstype.I.TEhypermethylated_SE_DG-n=0
89	TLX3	1	2	; EC_mNSvstype.I.TEhypermethylated_type.I.TE-n=0; EC_mNSvstype.I.TEhypermethylated_EC_mNS-n=2; SE_DGvsSShypermethylated_SE_DG-n=0; SE_DGvsSShypermethylated_SS-n=0; SE_DGvstype.I.TEhypermethylated_SE_DG-n=0
90	NKX2-5	1	2	; EC_mNSvstype.I.TEhypermethylated_type.I.TE-n=0; EC_mNSvstype.I.TEhypermethylated_EC_mNS-n=2; SE_DGvsSShypermethylated_SE_DG-n=0; SE_DGvsSShypermethylated_SS-n=0; SE_DGvstype.I.TEhypermethylated_SE_DG-n=0
91	TUBB	2	2	; EC_mNSvstype.I.TEhypermethylated_type.I.TE-n=0; EC_mNSvstype.I.TEhypermethylated_EC_mNS-n=1; SE_DGvsSShypermethylated_SE_DG-n=1; SE_DGvsSShypermethylated_SS-n=0; SE_DGvstype.I.TEhypermethylated_SE_DG-n=0
92	MSH5	2	2	; EC_mNSvstype.I.TEhypermethylated_type.I.TE-n=0; EC_mNSvstype.I.TEhypermethylated_EC_mNS-n=1; SE_DGvsSShypermethylated_SE_DG-n=0; SE_DGvsSShypermethylated_SS-n=1; SE_DGvstype.I.TEhypermethylated_SE_DG-n=0
93	MSH5-SAPCD1	2	2	; EC_mNSvstype.I.TEhypermethylated_type.I.TE-n=0; EC_mNSvstype.I.TEhypermethylated_EC_mNS-n=1; SE_DGvsSShypermethylated_SE_DG-n=0; SE_DGvsSShypermethylated_SS-n=1; SE_DGvstype.I.TEhypermethylated_SE_DG-n=0
94	VWA7	2	2	; EC_mNSvstype.I.TEhypermethylated_type.I.TE-n=0; EC_mNSvstype.I.TEhypermethylated_EC_mNS-n=1; SE_DGvsSShypermethylated_SE_DG-n=0; SE_DGvsSShypermethylated_SS-n=1; SE_DGvstype.I.TEhypermethylated_SE_DG-n=0
95	C2	2	3	; EC_mNSvstype.I.TEhypermethylated_type.I.TE-n=0; EC_mNSvstype.I.TEhypermethylated_EC_mNS-n=1; SE_DGvsSShypermethylated_SE_DG-n=2; SE_DGvsSShypermethylated_SS-n=0; SE_DGvstype.I.TEhypermethylated_SE_DG-n=0
96	TNXB	3	6	; EC_mNSvstype.I.TEhypermethylated_type.I.TE-n=0; EC_mNSvstype.I.TEhypermethylated_EC_mNS-n=3; SE_DGvsSShypermethylated_SE_DG-n=2; SE_DGvsSShypermethylated_SS-n=1; SE_DGvstype.I.TEhypermethylated_SE_DG-n=0
97	ATF6B	3	4	; EC_mNSvstype.I.TEhypermethylated_type.I.TE-n=0; EC_mNSvstype.I.TEhypermethylated_EC_mNS-n=1; SE_DGvsSShypermethylated_SE_DG-n=2; SE_DGvsSShypermethylated_SS-n=1; SE_DGvstype.I.TEhypermethylated_SE_DG-n=0
98	PPT2	2	2	; EC_mNSvstype.I.TEhypermethylated_type.I.TE-n=0; EC_mNSvstype.I.TEhypermethylated_EC_mNS-n=1; SE_DGvsSShypermethylated_SE_DG-n=1; SE_DGvsSShypermethylated_SS-n=0; SE_DGvstype.I.TEhypermethylated_SE_DG-n=0
99	PPT2-EGFL8	2	2	; EC_mNSvstype.I.TEhypermethylated_type.I.TE-n=0; EC_mNSvstype.I.TEhypermethylated_EC_mNS-n=1; SE_DGvsSShypermethylated_SE_DG-n=1; SE_DGvsSShypermethylated_SS-n=0; SE_DGvstype.I.TEhypermethylated_SE_DG-n=0
100	PRRT1	2	2	; EC_mNSvstype.I.TEhypermethylated_type.I.TE-n=0; EC_mNSvstype.I.TEhypermethylated_EC_mNS-n=1; SE_DGvsSShypermethylated_SE_DG-n=1; SE_DGvsSShypermethylated_SS-n=0; SE_DGvstype.I.TEhypermethylated_SE_DG-n=0
101	GPSM3	2	2	; EC_mNSvstype.I.TEhypermethylated_type.I.TE-n=0; EC_mNSvstype.I.TEhypermethylated_EC_mNS-n=1; SE_DGvsSShypermethylated_SE_DG-n=1; SE_DGvsSShypermethylated_SS-n=0; SE_DGvstype.I.TEhypermethylated_SE_DG-n=0
102	NOTCH4	2	2	; EC_mNSvstype.I.TEhypermethylated_type.I.TE-n=0; EC_mNSvstype.I.TEhypermethylated_EC_mNS-n=1; SE_DGvsSShypermethylated_SE_DG-n=1; SE_DGvsSShypermethylated_SS-n=0; SE_DGvstype.I.TEhypermethylated_SE_DG-n=0
103	HLA-DPB1	2	2	; EC_mNSvstype.I.TEhypermethylated_type.I.TE-n=0; EC_mNSvstype.I.TEhypermethylated_EC_mNS-n=1; SE_DGvsSShypermethylated_SE_DG-n=0; SE_DGvsSShypermethylated_SS-n=1; SE_DGvstype.I.TEhypermethylated_SE_DG-n=0
104	HLA-DPA1	2	3	; EC_mNSvstype.I.TEhypermethylated_type.I.TE-n=0; EC_mNSvstype.I.TEhypermethylated_EC_mNS-n=1; SE_DGvsSShypermethylated_SE_DG-n=0; SE_DGvsSShypermethylated_SS-n=2; SE_DGvstype.I.TEhypermethylated_SE_DG-n=0
105	SYNGAP1	2	2	; EC_mNSvstype.I.TEhypermethylated_type.I.TE-n=0; EC_mNSvstype.I.TEhypermethylated_EC_mNS-n=1; SE_DGvsSShypermethylated_SE_DG-n=1; SE_DGvsSShypermethylated_SS-n=0; SE_DGvstype.I.TEhypermethylated_SE_DG-n=0
106	SIM1	1	4	; EC_mNSvstype.I.TEhypermethylated_type.I.TE-n=0; EC_mNSvstype.I.TEhypermethylated_EC_mNS-n=4; SE_DGvsSShypermethylated_SE_DG-n=0; SE_DGvsSShypermethylated_SS-n=0; SE_DGvstype.I.TEhypermethylated_SE_DG-n=0
107	NHSL1	2	2	; EC_mNSvstype.I.TEhypermethylated_type.I.TE-n=0; EC_mNSvstype.I.TEhypermethylated_EC_mNS-n=1; SE_DGvsSShypermethylated_SE_DG-n=1; SE_DGvsSShypermethylated_SS-n=0; SE_DGvstype.I.TEhypermethylated_SE_DG-n=0
108	PRKAR1B	2	2	; EC_mNSvstype.I.TEhypermethylated_type.I.TE-n=0; EC_mNSvstype.I.TEhypermethylated_EC_mNS-n=1; SE_DGvsSShypermethylated_SE_DG-n=1; SE_DGvsSShypermethylated_SS-n=0; SE_DGvstype.I.TEhypermethylated_SE_DG-n=0
109	ELN	2	2	; EC_mNSvstype.I.TEhypermethylated_type.I.TE-n=0; EC_mNSvstype.I.TEhypermethylated_EC_mNS-n=1; SE_DGvsSShypermethylated_SE_DG-n=1; SE_DGvsSShypermethylated_SS-n=0; SE_DGvstype.I.TEhypermethylated_SE_DG-n=0
110	PTPRN2	2	3	; EC_mNSvstype.I.TEhypermethylated_type.I.TE-n=0; EC_mNSvstype.I.TEhypermethylated_EC_mNS-n=1; SE_DGvsSShypermethylated_SE_DG-n=2; SE_DGvsSShypermethylated_SS-n=0; SE_DGvstype.I.TEhypermethylated_SE_DG-n=0
111	NKX2-6	1	3	; EC_mNSvstype.I.TEhypermethylated_type.I.TE-n=0; EC_mNSvstype.I.TEhypermethylated_EC_mNS-n=3; SE_DGvsSShypermethylated_SE_DG-n=0; SE_DGvsSShypermethylated_SS-n=0; SE_DGvstype.I.TEhypermethylated_SE_DG-n=0
112	RP11-175E9.1	1	2	; EC_mNSvstype.I.TEhypermethylated_type.I.TE-n=0; EC_mNSvstype.I.TEhypermethylated_EC_mNS-n=2; SE_DGvsSShypermethylated_SE_DG-n=0; SE_DGvsSShypermethylated_SS-n=0; SE_DGvstype.I.TEhypermethylated_SE_DG-n=0
113	PLAT	2	2	; EC_mNSvstype.I.TEhypermethylated_type.I.TE-n=0; EC_mNSvstype.I.TEhypermethylated_EC_mNS-n=1; SE_DGvsSShypermethylated_SE_DG-n=1; SE_DGvsSShypermethylated_SS-n=0; SE_DGvstype.I.TEhypermethylated_SE_DG-n=0
114	CACNB2	1	2	; EC_mNSvstype.I.TEhypermethylated_type.I.TE-n=0; EC_mNSvstype.I.TEhypermethylated_EC_mNS-n=0; SE_DGvsSShypermethylated_SE_DG-n=2; SE_DGvsSShypermethylated_SS-n=0; SE_DGvstype.I.TEhypermethylated_SE_DG-n=0
115	CDHR5	1	2	; EC_mNSvstype.I.TEhypermethylated_type.I.TE-n=0; EC_mNSvstype.I.TEhypermethylated_EC_mNS-n=0; SE_DGvsSShypermethylated_SE_DG-n=2; SE_DGvsSShypermethylated_SS-n=0; SE_DGvstype.I.TEhypermethylated_SE_DG-n=0
116	BSCL2	1	2	; EC_mNSvstype.I.TEhypermethylated_type.I.TE-n=0; EC_mNSvstype.I.TEhypermethylated_EC_mNS-n=0; SE_DGvsSShypermethylated_SE_DG-n=2; SE_DGvsSShypermethylated_SS-n=0; SE_DGvstype.I.TEhypermethylated_SE_DG-n=0
117	HNRNPUL2-BSCL2	1	2	; EC_mNSvstype.I.TEhypermethylated_type.I.TE-n=0; EC_mNSvstype.I.TEhypermethylated_EC_mNS-n=0; SE_DGvsSShypermethylated_SE_DG-n=2; SE_DGvsSShypermethylated_SS-n=0; SE_DGvstype.I.TEhypermethylated_SE_DG-n=0
118	RP11-83B20.1	2	2	; EC_mNSvstype.I.TEhypermethylated_type.I.TE-n=0; EC_mNSvstype.I.TEhypermethylated_EC_mNS-n=0; SE_DGvsSShypermethylated_SE_DG-n=1; SE_DGvsSShypermethylated_SS-n=0; SE_DGvstype.I.TEhypermethylated_SE_DG-n=1
119	LINC01044	1	2	; EC_mNSvstype.I.TEhypermethylated_type.I.TE-n=0; EC_mNSvstype.I.TEhypermethylated_EC_mNS-n=0; SE_DGvsSShypermethylated_SE_DG-n=2; SE_DGvsSShypermethylated_SS-n=0; SE_DGvstype.I.TEhypermethylated_SE_DG-n=0
120	ATP11A	1	2	; EC_mNSvstype.I.TEhypermethylated_type.I.TE-n=0; EC_mNSvstype.I.TEhypermethylated_EC_mNS-n=0; SE_DGvsSShypermethylated_SE_DG-n=2; SE_DGvsSShypermethylated_SS-n=0; SE_DGvstype.I.TEhypermethylated_SE_DG-n=0
121	MCF2L	1	2	; EC_mNSvstype.I.TEhypermethylated_type.I.TE-n=0; EC_mNSvstype.I.TEhypermethylated_EC_mNS-n=0; SE_DGvsSShypermethylated_SE_DG-n=2; SE_DGvsSShypermethylated_SS-n=0; SE_DGvstype.I.TEhypermethylated_SE_DG-n=0
122	PLCB2	2	2	; EC_mNSvstype.I.TEhypermethylated_type.I.TE-n=0; EC_mNSvstype.I.TEhypermethylated_EC_mNS-n=0; SE_DGvsSShypermethylated_SE_DG-n=1; SE_DGvsSShypermethylated_SS-n=1; SE_DGvstype.I.TEhypermethylated_SE_DG-n=0
123	KLHDC4	1	2	; EC_mNSvstype.I.TEhypermethylated_type.I.TE-n=0; EC_mNSvstype.I.TEhypermethylated_EC_mNS-n=0; SE_DGvsSShypermethylated_SE_DG-n=2; SE_DGvsSShypermethylated_SS-n=0; SE_DGvstype.I.TEhypermethylated_SE_DG-n=0
124	ALOX12	2	2	; EC_mNSvstype.I.TEhypermethylated_type.I.TE-n=0; EC_mNSvstype.I.TEhypermethylated_EC_mNS-n=0; SE_DGvsSShypermethylated_SE_DG-n=1; SE_DGvsSShypermethylated_SS-n=0; SE_DGvstype.I.TEhypermethylated_SE_DG-n=1
125	RP11-589P10.7	2	2	; EC_mNSvstype.I.TEhypermethylated_type.I.TE-n=0; EC_mNSvstype.I.TEhypermethylated_EC_mNS-n=0; SE_DGvsSShypermethylated_SE_DG-n=1; SE_DGvsSShypermethylated_SS-n=0; SE_DGvstype.I.TEhypermethylated_SE_DG-n=1
126	RP11-589P10.5	2	2	; EC_mNSvstype.I.TEhypermethylated_type.I.TE-n=0; EC_mNSvstype.I.TEhypermethylated_EC_mNS-n=0; SE_DGvsSShypermethylated_SE_DG-n=1; SE_DGvsSShypermethylated_SS-n=0; SE_DGvstype.I.TEhypermethylated_SE_DG-n=1
127	RAI1	1	2	; EC_mNSvstype.I.TEhypermethylated_type.I.TE-n=0; EC_mNSvstype.I.TEhypermethylated_EC_mNS-n=0; SE_DGvsSShypermethylated_SE_DG-n=2; SE_DGvsSShypermethylated_SS-n=0; SE_DGvstype.I.TEhypermethylated_SE_DG-n=0
128	NFATC1	1	2	; EC_mNSvstype.I.TEhypermethylated_type.I.TE-n=0; EC_mNSvstype.I.TEhypermethylated_EC_mNS-n=0; SE_DGvsSShypermethylated_SE_DG-n=2; SE_DGvsSShypermethylated_SS-n=0; SE_DGvstype.I.TEhypermethylated_SE_DG-n=0
129	AC016586.1	1	2	; EC_mNSvstype.I.TEhypermethylated_type.I.TE-n=0; EC_mNSvstype.I.TEhypermethylated_EC_mNS-n=0; SE_DGvsSShypermethylated_SE_DG-n=2; SE_DGvsSShypermethylated_SS-n=0; SE_DGvstype.I.TEhypermethylated_SE_DG-n=0
130	ZBTB7A	1	2	; EC_mNSvstype.I.TEhypermethylated_type.I.TE-n=0; EC_mNSvstype.I.TEhypermethylated_EC_mNS-n=0; SE_DGvsSShypermethylated_SE_DG-n=2; SE_DGvsSShypermethylated_SS-n=0; SE_DGvstype.I.TEhypermethylated_SE_DG-n=0
131	NDUFA13	1	2	; EC_mNSvstype.I.TEhypermethylated_type.I.TE-n=0; EC_mNSvstype.I.TEhypermethylated_EC_mNS-n=0; SE_DGvsSShypermethylated_SE_DG-n=2; SE_DGvsSShypermethylated_SS-n=0; SE_DGvstype.I.TEhypermethylated_SE_DG-n=0
132	YJEFN3	1	3	; EC_mNSvstype.I.TEhypermethylated_type.I.TE-n=0; EC_mNSvstype.I.TEhypermethylated_EC_mNS-n=0; SE_DGvsSShypermethylated_SE_DG-n=3; SE_DGvsSShypermethylated_SS-n=0; SE_DGvstype.I.TEhypermethylated_SE_DG-n=0
133	CTC-260F20.3	1	3	; EC_mNSvstype.I.TEhypermethylated_type.I.TE-n=0; EC_mNSvstype.I.TEhypermethylated_EC_mNS-n=0; SE_DGvsSShypermethylated_SE_DG-n=3; SE_DGvsSShypermethylated_SS-n=0; SE_DGvstype.I.TEhypermethylated_SE_DG-n=0
134	ZNF628	1	2	; EC_mNSvstype.I.TEhypermethylated_type.I.TE-n=0; EC_mNSvstype.I.TEhypermethylated_EC_mNS-n=0; SE_DGvsSShypermethylated_SE_DG-n=2; SE_DGvsSShypermethylated_SS-n=0; SE_DGvstype.I.TEhypermethylated_SE_DG-n=0
135	NAT14	1	2	; EC_mNSvstype.I.TEhypermethylated_type.I.TE-n=0; EC_mNSvstype.I.TEhypermethylated_EC_mNS-n=0; SE_DGvsSShypermethylated_SE_DG-n=2; SE_DGvsSShypermethylated_SS-n=0; SE_DGvstype.I.TEhypermethylated_SE_DG-n=0
136	SSC5D	1	2	; EC_mNSvstype.I.TEhypermethylated_type.I.TE-n=0; EC_mNSvstype.I.TEhypermethylated_EC_mNS-n=0; SE_DGvsSShypermethylated_SE_DG-n=2; SE_DGvsSShypermethylated_SS-n=0; SE_DGvstype.I.TEhypermethylated_SE_DG-n=0
137	ECEL1P2	2	2	; EC_mNSvstype.I.TEhypermethylated_type.I.TE-n=0; EC_mNSvstype.I.TEhypermethylated_EC_mNS-n=0; SE_DGvsSShypermethylated_SE_DG-n=1; SE_DGvsSShypermethylated_SS-n=0; SE_DGvstype.I.TEhypermethylated_SE_DG-n=1
138	AC131097.3	1	2	; EC_mNSvstype.I.TEhypermethylated_type.I.TE-n=0; EC_mNSvstype.I.TEhypermethylated_EC_mNS-n=0; SE_DGvsSShypermethylated_SE_DG-n=2; SE_DGvsSShypermethylated_SS-n=0; SE_DGvstype.I.TEhypermethylated_SE_DG-n=0
139	BLCAP	1	2	; EC_mNSvstype.I.TEhypermethylated_type.I.TE-n=0; EC_mNSvstype.I.TEhypermethylated_EC_mNS-n=0; SE_DGvsSShypermethylated_SE_DG-n=2; SE_DGvsSShypermethylated_SS-n=0; SE_DGvstype.I.TEhypermethylated_SE_DG-n=0
140	NELFA	1	2	; EC_mNSvstype.I.TEhypermethylated_type.I.TE-n=0; EC_mNSvstype.I.TEhypermethylated_EC_mNS-n=0; SE_DGvsSShypermethylated_SE_DG-n=2; SE_DGvsSShypermethylated_SS-n=0; SE_DGvstype.I.TEhypermethylated_SE_DG-n=0
141	LPCAT1	1	2	; EC_mNSvstype.I.TEhypermethylated_type.I.TE-n=0; EC_mNSvstype.I.TEhypermethylated_EC_mNS-n=0; SE_DGvsSShypermethylated_SE_DG-n=2; SE_DGvsSShypermethylated_SS-n=0; SE_DGvstype.I.TEhypermethylated_SE_DG-n=0
142	CTD-2201E18.3	1	2	; EC_mNSvstype.I.TEhypermethylated_type.I.TE-n=0; EC_mNSvstype.I.TEhypermethylated_EC_mNS-n=0; SE_DGvsSShypermethylated_SE_DG-n=2; SE_DGvsSShypermethylated_SS-n=0; SE_DGvstype.I.TEhypermethylated_SE_DG-n=0
143	ANXA2R	1	2	; EC_mNSvstype.I.TEhypermethylated_type.I.TE-n=0; EC_mNSvstype.I.TEhypermethylated_EC_mNS-n=0; SE_DGvsSShypermethylated_SE_DG-n=2; SE_DGvsSShypermethylated_SS-n=0; SE_DGvstype.I.TEhypermethylated_SE_DG-n=0
144	MDC1	1	2	; EC_mNSvstype.I.TEhypermethylated_type.I.TE-n=0; EC_mNSvstype.I.TEhypermethylated_EC_mNS-n=0; SE_DGvsSShypermethylated_SE_DG-n=2; SE_DGvsSShypermethylated_SS-n=0; SE_DGvstype.I.TEhypermethylated_SE_DG-n=0
145	DDAH2	2	2	; EC_mNSvstype.I.TEhypermethylated_type.I.TE-n=0; EC_mNSvstype.I.TEhypermethylated_EC_mNS-n=0; SE_DGvsSShypermethylated_SE_DG-n=1; SE_DGvsSShypermethylated_SS-n=1; SE_DGvstype.I.TEhypermethylated_SE_DG-n=0
146	CLIC1	2	2	; EC_mNSvstype.I.TEhypermethylated_type.I.TE-n=0; EC_mNSvstype.I.TEhypermethylated_EC_mNS-n=0; SE_DGvsSShypermethylated_SE_DG-n=1; SE_DGvsSShypermethylated_SS-n=1; SE_DGvstype.I.TEhypermethylated_SE_DG-n=0
147	ZBTB12	1	2	; EC_mNSvstype.I.TEhypermethylated_type.I.TE-n=0; EC_mNSvstype.I.TEhypermethylated_EC_mNS-n=0; SE_DGvsSShypermethylated_SE_DG-n=2; SE_DGvsSShypermethylated_SS-n=0; SE_DGvstype.I.TEhypermethylated_SE_DG-n=0
148	ZC3H12D	2	2	; EC_mNSvstype.I.TEhypermethylated_type.I.TE-n=0; EC_mNSvstype.I.TEhypermethylated_EC_mNS-n=0; SE_DGvsSShypermethylated_SE_DG-n=1; SE_DGvsSShypermethylated_SS-n=1; SE_DGvstype.I.TEhypermethylated_SE_DG-n=0
149	AGAP3	1	2	; EC_mNSvstype.I.TEhypermethylated_type.I.TE-n=0; EC_mNSvstype.I.TEhypermethylated_EC_mNS-n=0; SE_DGvsSShypermethylated_SE_DG-n=2; SE_DGvsSShypermethylated_SS-n=0; SE_DGvstype.I.TEhypermethylated_SE_DG-n=0

## Sheet: overlap tumor and CL DMRs
	Gene.Symbol	overlap.DMRs.in.CLS.and...
1	SEP9	EC_mNSvstype.I.TEhypermethylated_EC_mNS
2	A1BG	SE_DGvsSShypermethylated_SE_DG
3	A1BG-AS1	SE_DGvsSShypermethylated_SE_DG
4	AATK	SE_DGvsSShypermethylated_SE_DG
5	ABCB8	EC_mNSvstype.I.TEhypermethylated_EC_mNS
6	AC003665.1	EC_mNSvstype.I.TEhypermethylated_EC_mNS
7	AC005281.2	EC_mNSvstype.I.TEhypermethylated_EC_mNS
8	AC005754.7	SE_DGvsSShypermethylated_SE_DG
9	AC005775.2	EC_mNSvstype.I.TEhypermethylated_EC_mNS
10	AC015815.3	EC_mNSvstype.I.TEhypermethylated_EC_mNS
11	AC015815.6	EC_mNSvstype.I.TEhypermethylated_EC_mNS
12	AC025171.1	SE_DGvsSShypermethylated_SE_DG
13	AC027763.2	EC_mNSvstype.I.TEhypermethylated_EC_mNS; SE_DGvsSShypermethylated_SE_DG; SE_DGvstype.I.TEhypermethylated_SE_DG
14	AC073626.2	SE_DGvsSShypermethylated_SE_DG
15	AC099754.1	EC_mNSvstype.I.TEhypermethylated_EC_mNS
16	AC106782.20	SE_DGvsSShypermethylated_SE_DG
17	AC115286.1	EC_mNSvstype.I.TEhypermethylated_EC_mNS
18	AC116050.1	SE_DGvsSShypermethylated_SE_DG
19	AC131097.3	SE_DGvsSShypermethylated_SE_DG
20	ACSF2	EC_mNSvstype.I.TEhypermethylated_EC_mNS
21	ACSL5	SE_DGvsSShypermethylated_SS
22	ACTA1	EC_mNSvstype.I.TEhypermethylated_EC_mNS
23	ACTA2	EC_mNSvstype.I.TEhypermethylated_EC_mNS
24	ADCYAP1	EC_mNSvstype.I.TEhypermethylated_EC_mNS
25	ADPRHL1	EC_mNSvstype.I.TEhypermethylated_EC_mNS
26	AHRR	EC_mNSvstype.I.TEhypermethylated_EC_mNS
27	AKAP12	EC_mNSvstype.I.TEhypermethylated_EC_mNS
28	AL031663.1	EC_mNSvstype.I.TEhypermethylated_EC_mNS
29	AL391005.1	EC_mNSvstype.I.TEhypermethylated_EC_mNS
30	AL445199.1	EC_mNSvstype.I.TEhypermethylated_EC_mNS
31	AL590822.2	EC_mNSvstype.I.TEhypermethylated_EC_mNS; SE_DGvsSShypermethylated_SE_DG
32	ALDH3A1	EC_mNSvstype.I.TEhypermethylated_EC_mNS
33	ALG3	SE_DGvsSShypermethylated_SE_DG
34	ALOX12	SE_DGvsSShypermethylated_SE_DG; SE_DGvstype.I.TEhypermethylated_SE_DG
35	ALOX12P2	EC_mNSvstype.I.TEhypermethylated_EC_mNS
36	ANAPC11	EC_mNSvstype.I.TEhypermethylated_EC_mNS
37	ANK2	EC_mNSvstype.I.TEhypermethylated_EC_mNS
38	ANKMY1	EC_mNSvstype.I.TEhypermethylated_EC_mNS
39	ANXA2R	SE_DGvsSShypermethylated_SE_DG
40	AP000282.2	EC_mNSvstype.I.TEhypermethylated_EC_mNS; SE_DGvsSShypermethylated_SE_DG
41	AP000439.5	SE_DGvsSShypermethylated_SE_DG
42	AP000697.6	EC_mNSvstype.I.TEhypermethylated_EC_mNS
43	AP000721.4	SE_DGvsSShypermethylated_SE_DG
44	AP000797.3	EC_mNSvstype.I.TEhypermethylated_EC_mNS
45	AP001362.1	SE_DGvsSShypermethylated_SE_DG
46	APCDD1L	EC_mNSvstype.I.TEhypermethylated_EC_mNS; SE_DGvsSShypermethylated_SE_DG
47	APCDD1L-AS1	EC_mNSvstype.I.TEhypermethylated_EC_mNS
48	ARID5B	SE_DGvsSShypermethylated_SE_DG
49	ASAP3	SE_DGvsSShypermethylated_SE_DG
50	ASB3	SE_DGvsSShypermethylated_SE_DG
51	ASCL2	EC_mNSvstype.I.TEhypermethylated_EC_mNS; SE_DGvsSShypermethylated_SE_DG
52	ASIC2	EC_mNSvstype.I.TEhypermethylated_EC_mNS
53	ASIC3	EC_mNSvstype.I.TEhypermethylated_EC_mNS
54	ASPDH	EC_mNSvstype.I.TEhypermethylated_EC_mNS
55	ATF6B	EC_mNSvstype.I.TEhypermethylated_EC_mNS; SE_DGvsSShypermethylated_SE_DG; SE_DGvsSShypermethylated_SS
56	ATP11A	SE_DGvsSShypermethylated_SE_DG
57	ATP6V0E2	SE_DGvsSShypermethylated_SE_DG
58	ATP6V0E2-AS1	SE_DGvsSShypermethylated_SE_DG
59	B3GALNT1	EC_mNSvstype.I.TEhypermethylated_EC_mNS
60	BAIAP2	SE_DGvsSShypermethylated_SE_DG
61	BAIAP2L2	SE_DGvsSShypermethylated_SE_DG
62	BARHL2	EC_mNSvstype.I.TEhypermethylated_EC_mNS
63	BCL7C	SE_DGvsSShypermethylated_SE_DG
64	BGN	SE_DGvsSShypermethylated_SE_DG
65	BLCAP	SE_DGvsSShypermethylated_SE_DG
66	BMX	EC_mNSvstype.I.TEhypermethylated_type.I.TE
67	BNIP3	SE_DGvsSShypermethylated_SE_DG
68	BRCC3	EC_mNSvstype.I.TEhypermethylated_type.I.TE
69	BRD2	EC_mNSvstype.I.TEhypermethylated_EC_mNS
70	BRD9	EC_mNSvstype.I.TEhypermethylated_EC_mNS
71	BRF1	SE_DGvsSShypermethylated_SE_DG
72	BSCL2	SE_DGvsSShypermethylated_SE_DG
73	BTBD18	SE_DGvsSShypermethylated_SE_DG
74	BTBD2	SE_DGvsSShypermethylated_SE_DG
75	BTBD6	SE_DGvsSShypermethylated_SE_DG
76	BTNL2	SE_DGvsSShypermethylated_SE_DG
77	BX470102.3	EC_mNSvstype.I.TEhypermethylated_EC_mNS
78	C10orf71	SE_DGvsSShypermethylated_SE_DG
79	C10orf71-AS1	SE_DGvsSShypermethylated_SE_DG
80	C19orf77	SE_DGvsSShypermethylated_SE_DG
81	C1orf65	SE_DGvsSShypermethylated_SE_DG
82	C1orf86	EC_mNSvstype.I.TEhypermethylated_EC_mNS; SE_DGvsSShypermethylated_SE_DG
83	C1orf94	EC_mNSvstype.I.TEhypermethylated_EC_mNS
84	C1RL	EC_mNSvstype.I.TEhypermethylated_EC_mNS
85	C1RL-AS1	EC_mNSvstype.I.TEhypermethylated_EC_mNS
86	C2	EC_mNSvstype.I.TEhypermethylated_EC_mNS; SE_DGvsSShypermethylated_SE_DG
87	C20orf201	SE_DGvsSShypermethylated_SE_DG
88	C2orf40	EC_mNSvstype.I.TEhypermethylated_EC_mNS
89	C2orf70	EC_mNSvstype.I.TEhypermethylated_EC_mNS
90	C6orf25	SE_DGvsSShypermethylated_SE_DG
91	C6orf47	EC_mNSvstype.I.TEhypermethylated_EC_mNS
92	C6orf47-AS1	EC_mNSvstype.I.TEhypermethylated_EC_mNS
93	C8orf31	EC_mNSvstype.I.TEhypermethylated_EC_mNS
94	CA10	EC_mNSvstype.I.TEhypermethylated_EC_mNS
95	CA7	EC_mNSvstype.I.TEhypermethylated_EC_mNS
96	CACNA1C	SE_DGvsSShypermethylated_SE_DG
97	CACNB2	SE_DGvsSShypermethylated_SE_DG
98	CACNG1	EC_mNSvstype.I.TEhypermethylated_EC_mNS
99	CACNG8	SE_DGvsSShypermethylated_SE_DG
100	CALCA	EC_mNSvstype.I.TEhypermethylated_EC_mNS
101	CALCB	EC_mNSvstype.I.TEhypermethylated_EC_mNS
102	CALHM1	EC_mNSvstype.I.TEhypermethylated_EC_mNS
103	CALHM2	EC_mNSvstype.I.TEhypermethylated_EC_mNS
104	CAPN1	SE_DGvsSShypermethylated_SE_DG
105	CARD14	EC_mNSvstype.I.TEhypermethylated_EC_mNS
106	CARTPT	EC_mNSvstype.I.TEhypermethylated_EC_mNS
107	CCDC140	EC_mNSvstype.I.TEhypermethylated_EC_mNS
108	CCDC169	EC_mNSvstype.I.TEhypermethylated_EC_mNS
109	CCDC169-SOHLH2	EC_mNSvstype.I.TEhypermethylated_EC_mNS
110	CCDC37	EC_mNSvstype.I.TEhypermethylated_EC_mNS
111	CCDC50	EC_mNSvstype.I.TEhypermethylated_EC_mNS
112	CCDC80	EC_mNSvstype.I.TEhypermethylated_EC_mNS
113	CCK	EC_mNSvstype.I.TEhypermethylated_EC_mNS
114	CFB	EC_mNSvstype.I.TEhypermethylated_EC_mNS
115	CHAD	EC_mNSvstype.I.TEhypermethylated_EC_mNS
116	CHAT	EC_mNSvstype.I.TEhypermethylated_EC_mNS
117	CHRM2	EC_mNSvstype.I.TEhypermethylated_EC_mNS
118	CILP2	SE_DGvsSShypermethylated_SE_DG
119	CKLF	SE_DGvsSShypermethylated_SE_DG
120	CKLF-CMTM1	SE_DGvsSShypermethylated_SE_DG
121	CLCN5	EC_mNSvstype.I.TEhypermethylated_type.I.TE
122	CLDN11	EC_mNSvstype.I.TEhypermethylated_EC_mNS
123	CLIC1	SE_DGvsSShypermethylated_SE_DG; SE_DGvsSShypermethylated_SS
124	CMC4	EC_mNSvstype.I.TEhypermethylated_type.I.TE
125	CMTM1	SE_DGvsSShypermethylated_SE_DG
126	CMYA5	EC_mNSvstype.I.TEhypermethylated_EC_mNS
127	CNPY1	EC_mNSvstype.I.TEhypermethylated_EC_mNS
128	COL11A2	SE_DGvsSShypermethylated_SE_DG
129	COL18A1	EC_mNSvstype.I.TEhypermethylated_EC_mNS
130	COL1A1	EC_mNSvstype.I.TEhypermethylated_EC_mNS
131	COL7A1	EC_mNSvstype.I.TEhypermethylated_EC_mNS
132	COLEC11	SE_DGvsSShypermethylated_SE_DG
133	COMMD10	SE_DGvsSShypermethylated_SE_DG
134	COPZ2	EC_mNSvstype.I.TEhypermethylated_EC_mNS
135	CPEB3	SE_DGvsSShypermethylated_SE_DG
136	CSNK1E	EC_mNSvstype.I.TEhypermethylated_EC_mNS
137	CSPG4	EC_mNSvstype.I.TEhypermethylated_EC_mNS
138	CTA-85E5.10	SE_DGvsSShypermethylated_SE_DG
139	CTB-14A14.2	EC_mNSvstype.I.TEhypermethylated_EC_mNS
140	CTBP1	EC_mNSvstype.I.TEhypermethylated_EC_mNS; SE_DGvsSShypermethylated_SE_DG
141	CTBP1-AS2	SE_DGvsSShypermethylated_SE_DG
142	CTC-359M8.1	EC_mNSvstype.I.TEhypermethylated_EC_mNS
143	CTD-2105E13.15	EC_mNSvstype.I.TEhypermethylated_EC_mNS
144	CTD-2201E18.3	SE_DGvsSShypermethylated_SE_DG
145	CTD-2349B8.1	SE_DGvsSShypermethylated_SE_DG
146	CTD-2530N21.4	SE_DGvsSShypermethylated_SE_DG
147	CTD-2545M3.6	EC_mNSvstype.I.TEhypermethylated_EC_mNS
148	CTD-2571L23.8	SE_DGvsSShypermethylated_SE_DG
149	CTD-2619J13.8	SE_DGvsSShypermethylated_SE_DG
150	CTNND1	SE_DGvsSShypermethylated_SE_DG
151	CUTA	SE_DGvsSShypermethylated_SE_DG
152	CYP2J2	EC_mNSvstype.I.TEhypermethylated_EC_mNS
153	CYR61	SE_DGvsSShypermethylated_SE_DG
154	CYTL1	EC_mNSvstype.I.TEhypermethylated_EC_mNS
155	DAXX	SE_DGvsSShypermethylated_SE_DG
156	DCC	EC_mNSvstype.I.TEhypermethylated_EC_mNS
157	DDAH1	SE_DGvsSShypermethylated_SE_DG
158	DDX56	SE_DGvsSShypermethylated_SE_DG
159	DENND1C	SE_DGvsSShypermethylated_SE_DG
160	DIP2C	EC_mNSvstype.I.TEhypermethylated_EC_mNS
161	DKC1	EC_mNSvstype.I.TEhypermethylated_type.I.TE
162	DNAJC6	EC_mNSvstype.I.TEhypermethylated_EC_mNS
163	DNALI1	SE_DGvsSShypermethylated_SE_DG
164	DNASE1L1	EC_mNSvstype.I.TEhypermethylated_type.I.TE
165	DPP6	EC_mNSvstype.I.TEhypermethylated_EC_mNS
166	DPYS	SE_DGvsSShypermethylated_SE_DG
167	DRD5	EC_mNSvstype.I.TEhypermethylated_EC_mNS
168	DSCAM	EC_mNSvstype.I.TEhypermethylated_EC_mNS
169	DUOX1	EC_mNSvstype.I.TEhypermethylated_EC_mNS
170	DUOX2	EC_mNSvstype.I.TEhypermethylated_EC_mNS
171	DUOXA1	EC_mNSvstype.I.TEhypermethylated_EC_mNS
172	DUOXA2	EC_mNSvstype.I.TEhypermethylated_EC_mNS
173	DUSP28	EC_mNSvstype.I.TEhypermethylated_EC_mNS
174	DXO	SE_DGvsSShypermethylated_SE_DG
175	DYSF	SE_DGvsSShypermethylated_SE_DG
176	ECE2	EC_mNSvstype.I.TEhypermethylated_EC_mNS
177	ECEL1	EC_mNSvstype.I.TEhypermethylated_EC_mNS
178	EDN3	EC_mNSvstype.I.TEhypermethylated_EC_mNS
179	EHBP1L1	SE_DGvsSShypermethylated_SE_DG
180	EHMT2	SE_DGvsSShypermethylated_SE_DG
181	EIF2B5	EC_mNSvstype.I.TEhypermethylated_EC_mNS; SE_DGvsSShypermethylated_SE_DG
182	ELANE	SE_DGvsSShypermethylated_SE_DG
183	EN2	EC_mNSvstype.I.TEhypermethylated_EC_mNS
184	ENO2	EC_mNSvstype.I.TEhypermethylated_EC_mNS
185	EPHA10	EC_mNSvstype.I.TEhypermethylated_EC_mNS
186	ESPN	EC_mNSvstype.I.TEhypermethylated_EC_mNS
187	EXOC7	EC_mNSvstype.I.TEhypermethylated_EC_mNS
188	F10	EC_mNSvstype.I.TEhypermethylated_EC_mNS
189	F7	EC_mNSvstype.I.TEhypermethylated_EC_mNS
190	FAM180A	EC_mNSvstype.I.TEhypermethylated_EC_mNS
191	FAM20B	SE_DGvsSShypermethylated_SE_DG
192	FAM3A	EC_mNSvstype.I.TEhypermethylated_type.I.TE
193	FAM3B	EC_mNSvstype.I.TEhypermethylated_EC_mNS
194	FAM69C	EC_mNSvstype.I.TEhypermethylated_EC_mNS
195	FASTK	SE_DGvsSShypermethylated_SE_DG
196	FBRSL1	SE_DGvsSShypermethylated_SE_DG
197	FBXL13	EC_mNSvstype.I.TEhypermethylated_EC_mNS
198	FBXO39	EC_mNSvstype.I.TEhypermethylated_EC_mNS
199	FCHO1	EC_mNSvstype.I.TEhypermethylated_EC_mNS
200	FGF12	EC_mNSvstype.I.TEhypermethylated_EC_mNS
201	FGR	SE_DGvsSShypermethylated_SE_DG
202	FIBIN	EC_mNSvstype.I.TEhypermethylated_EC_mNS
203	FILIP1	EC_mNSvstype.I.TEhypermethylated_EC_mNS
204	FKBPL	SE_DGvsSShypermethylated_SE_DG
205	FLI1	SE_DGvsSShypermethylated_SE_DG
206	FLJ27365	EC_mNSvstype.I.TEhypermethylated_EC_mNS
207	FLRT1	EC_mNSvstype.I.TEhypermethylated_EC_mNS
208	FOXI2	EC_mNSvstype.I.TEhypermethylated_EC_mNS
209	FOXK2	SE_DGvsSShypermethylated_SE_DG
210	FOXP2	SE_DGvsSShypermethylated_SE_DG
211	FOXP4	EC_mNSvstype.I.TEhypermethylated_type.I.TE
212	FSCN2	EC_mNSvstype.I.TEhypermethylated_EC_mNS
213	FTSJ1	EC_mNSvstype.I.TEhypermethylated_type.I.TE
214	FUT4	SE_DGvsSShypermethylated_SE_DG
215	G0S2	EC_mNSvstype.I.TEhypermethylated_EC_mNS
216	G6PD	EC_mNSvstype.I.TEhypermethylated_type.I.TE
217	GAB3	EC_mNSvstype.I.TEhypermethylated_type.I.TE
218	GABRA1	EC_mNSvstype.I.TEhypermethylated_EC_mNS
219	GABRA5	SE_DGvsSShypermethylated_SE_DG
220	GABRB3	SE_DGvsSShypermethylated_SE_DG
221	GABRG2	EC_mNSvstype.I.TEhypermethylated_EC_mNS
222	GAL3ST3	EC_mNSvstype.I.TEhypermethylated_EC_mNS
223	GALNT9	EC_mNSvstype.I.TEhypermethylated_EC_mNS
224	GALR2	EC_mNSvstype.I.TEhypermethylated_EC_mNS
225	GCM2	EC_mNSvstype.I.TEhypermethylated_EC_mNS
226	GDNF	EC_mNSvstype.I.TEhypermethylated_EC_mNS; SE_DGvsSShypermethylated_SE_DG
227	GDNF-AS1	EC_mNSvstype.I.TEhypermethylated_EC_mNS
228	GFY	EC_mNSvstype.I.TEhypermethylated_EC_mNS
229	GHDC	EC_mNSvstype.I.TEhypermethylated_EC_mNS
230	GLRA1	EC_mNSvstype.I.TEhypermethylated_EC_mNS
231	GNAS	SE_DGvsSShypermethylated_SE_DG
232	GNAS-AS1	SE_DGvsSShypermethylated_SE_DG
233	GNG3	SE_DGvsSShypermethylated_SE_DG
234	GNMT	SE_DGvsSShypermethylated_SE_DG
235	GPANK1	EC_mNSvstype.I.TEhypermethylated_EC_mNS
236	GPR12	SE_DGvsSShypermethylated_SE_DG
237	GPR123	EC_mNSvstype.I.TEhypermethylated_EC_mNS
238	GPR123-AS1	EC_mNSvstype.I.TEhypermethylated_EC_mNS
239	GPR75	SE_DGvsSShypermethylated_SE_DG
240	GPR75-ASB3	SE_DGvsSShypermethylated_SE_DG
241	GRAMD1B	EC_mNSvstype.I.TEhypermethylated_EC_mNS
242	GRB10	SE_DGvsSShypermethylated_SE_DG
243	GRIA4	EC_mNSvstype.I.TEhypermethylated_EC_mNS
244	GRIPAP1	EC_mNSvstype.I.TEhypermethylated_type.I.TE
245	GRM1	EC_mNSvstype.I.TEhypermethylated_EC_mNS
246	GRM6	EC_mNSvstype.I.TEhypermethylated_EC_mNS
247	GUCY2D	EC_mNSvstype.I.TEhypermethylated_EC_mNS
248	HAUS7	EC_mNSvstype.I.TEhypermethylated_type.I.TE; SE_DGvsSShypermethylated_SE_DG
249	HBM	EC_mNSvstype.I.TEhypermethylated_EC_mNS
250	HBZP1	EC_mNSvstype.I.TEhypermethylated_EC_mNS
251	HCG17	SE_DGvsSShypermethylated_SE_DG
252	HCG4P3	EC_mNSvstype.I.TEhypermethylated_EC_mNS
253	HCG4P7	EC_mNSvstype.I.TEhypermethylated_EC_mNS
254	HCN4	EC_mNSvstype.I.TEhypermethylated_EC_mNS
255	HCRT	EC_mNSvstype.I.TEhypermethylated_EC_mNS
256	HES3	EC_mNSvstype.I.TEhypermethylated_EC_mNS
257	HIC1	EC_mNSvstype.I.TEhypermethylated_EC_mNS
258	HIST1H1A	SE_DGvsSShypermethylated_SE_DG
259	HIST1H1PS2	SE_DGvsSShypermethylated_SE_DG
260	HIST1H2AI	EC_mNSvstype.I.TEhypermethylated_EC_mNS
261	HIST1H2APS4	EC_mNSvstype.I.TEhypermethylated_EC_mNS
262	HIST1H2BI	EC_mNSvstype.I.TEhypermethylated_EC_mNS
263	HIST1H2BL	EC_mNSvstype.I.TEhypermethylated_EC_mNS
264	HIST1H3A	SE_DGvsSShypermethylated_SE_DG
265	HIST1H3G	EC_mNSvstype.I.TEhypermethylated_EC_mNS
266	HIST1H3H	EC_mNSvstype.I.TEhypermethylated_EC_mNS
267	HIST1H4A	SE_DGvsSShypermethylated_SE_DG
268	HIST1H4C	SE_DGvsSShypermethylated_SE_DG
269	HIST1H4PS1	EC_mNSvstype.I.TEhypermethylated_EC_mNS
270	HIVEP3	SE_DGvsSShypermethylated_SE_DG
271	HKR1	EC_mNSvstype.I.TEhypermethylated_EC_mNS
272	HLA-DPA1	EC_mNSvstype.I.TEhypermethylated_EC_mNS; SE_DGvsSShypermethylated_SS
273	HLA-DPB1	EC_mNSvstype.I.TEhypermethylated_EC_mNS; SE_DGvsSShypermethylated_SS
274	HLA-H	EC_mNSvstype.I.TEhypermethylated_EC_mNS
275	HLA-J	EC_mNSvstype.I.TEhypermethylated_EC_mNS
276	HLA-W	SE_DGvsSShypermethylated_SE_DG
277	HNRNPUL2-BSCL2	SE_DGvsSShypermethylated_SE_DG
278	HORMAD2	SE_DGvsSShypermethylated_SE_DG
279	HOXA-AS3	SE_DGvsSShypermethylated_SE_DG
280	HOXA3	SE_DGvsSShypermethylated_SE_DG
281	HOXA5	SE_DGvsSShypermethylated_SE_DG
282	HOXA6	SE_DGvsSShypermethylated_SE_DG
283	HOXB-AS1	SE_DGvsSShypermethylated_SE_DG
284	HOXB-AS3	EC_mNSvstype.I.TEhypermethylated_EC_mNS; SE_DGvsSShypermethylated_SE_DG
285	HOXB3	EC_mNSvstype.I.TEhypermethylated_EC_mNS; SE_DGvsSShypermethylated_SE_DG
286	HOXB6	EC_mNSvstype.I.TEhypermethylated_EC_mNS; SE_DGvsSShypermethylated_SE_DG
287	HOXB7	EC_mNSvstype.I.TEhypermethylated_EC_mNS
288	HS3ST3B1	SE_DGvsSShypermethylated_SE_DG
289	hsa-mir-490	EC_mNSvstype.I.TEhypermethylated_EC_mNS
290	HSD17B10	EC_mNSvstype.I.TEhypermethylated_type.I.TE
291	HTATSF1	EC_mNSvstype.I.TEhypermethylated_type.I.TE
292	HTR1A	EC_mNSvstype.I.TEhypermethylated_EC_mNS
293	HUG1	EC_mNSvstype.I.TEhypermethylated_EC_mNS
294	ICAM2	SE_DGvsSShypermethylated_SS
295	IDH3G	EC_mNSvstype.I.TEhypermethylated_type.I.TE
296	IFITM10	SE_DGvsSShypermethylated_SE_DG
297	IFT140	EC_mNSvstype.I.TEhypermethylated_EC_mNS
298	IGF1R	SE_DGvsSShypermethylated_SE_DG
299	IGSF22	EC_mNSvstype.I.TEhypermethylated_EC_mNS
300	IKBKG	EC_mNSvstype.I.TEhypermethylated_type.I.TE
301	INF2	SE_DGvsSShypermethylated_SE_DG
302	INHBB	EC_mNSvstype.I.TEhypermethylated_EC_mNS
303	INPP5K	SE_DGvsSShypermethylated_SE_DG
304	IQSEC1	EC_mNSvstype.I.TEhypermethylated_EC_mNS
305	IRF5	EC_mNSvstype.I.TEhypermethylated_EC_mNS
306	ITPRIPL2	SE_DGvsSShypermethylated_SE_DG
307	KCNAB3	EC_mNSvstype.I.TEhypermethylated_EC_mNS
308	KCNE4	SE_DGvsSShypermethylated_SE_DG
309	KCNK7	SE_DGvsSShypermethylated_SE_DG
310	KCNQ1	EC_mNSvstype.I.TEhypermethylated_EC_mNS
311	KCNQ1-AS1	EC_mNSvstype.I.TEhypermethylated_EC_mNS
312	KCNQ1DN	EC_mNSvstype.I.TEhypermethylated_EC_mNS
313	KDM2B	EC_mNSvstype.I.TEhypermethylated_EC_mNS
314	KDM6B	SE_DGvsSShypermethylated_SE_DG
315	KIAA0930	EC_mNSvstype.I.TEhypermethylated_EC_mNS
316	KIAA1210	SE_DGvsSShypermethylated_SE_DG
317	KIF25	EC_mNSvstype.I.TEhypermethylated_EC_mNS
318	KIF7	SE_DGvsSShypermethylated_SE_DG
319	KRBOX4	EC_mNSvstype.I.TEhypermethylated_type.I.TE
320	KREMEN2	SE_DGvsSShypermethylated_SE_DG
321	KRT72	SE_DGvsSShypermethylated_SE_DG
322	KRT86	SE_DGvsSShypermethylated_SE_DG
323	LBX1	EC_mNSvstype.I.TEhypermethylated_EC_mNS
324	LBX1-AS1	EC_mNSvstype.I.TEhypermethylated_EC_mNS
325	LBX2	EC_mNSvstype.I.TEhypermethylated_EC_mNS
326	LBX2-AS1	EC_mNSvstype.I.TEhypermethylated_EC_mNS
327	LDHD	SE_DGvsSShypermethylated_SE_DG
328	LDLRAD4	SE_DGvsSShypermethylated_SE_DG
329	LHX9	EC_mNSvstype.I.TEhypermethylated_EC_mNS
330	LINC00028	EC_mNSvstype.I.TEhypermethylated_EC_mNS; SE_DGvsSShypermethylated_SE_DG
331	LINC00338	EC_mNSvstype.I.TEhypermethylated_EC_mNS
332	LINC00346	SE_DGvsSShypermethylated_SE_DG
333	LINC00403	EC_mNSvstype.I.TEhypermethylated_EC_mNS
334	LINC00404	EC_mNSvstype.I.TEhypermethylated_EC_mNS
335	LINC00654	SE_DGvsSShypermethylated_SE_DG
336	LINC00682	EC_mNSvstype.I.TEhypermethylated_EC_mNS; SE_DGvsSShypermethylated_SE_DG
337	LINC00842	EC_mNSvstype.I.TEhypermethylated_EC_mNS
338	LINC00900	EC_mNSvstype.I.TEhypermethylated_EC_mNS
339	LL22NC03-63E9.3	SE_DGvsSShypermethylated_SE_DG
340	LMF1	SE_DGvsSShypermethylated_SE_DG
341	LMO3	EC_mNSvstype.I.TEhypermethylated_EC_mNS
342	LRRC14B	EC_mNSvstype.I.TEhypermethylated_EC_mNS
343	LRRC17	EC_mNSvstype.I.TEhypermethylated_EC_mNS
344	LRRC23	EC_mNSvstype.I.TEhypermethylated_EC_mNS
345	LRRC3B	EC_mNSvstype.I.TEhypermethylated_EC_mNS
346	LRRC61	SE_DGvsSShypermethylated_SE_DG
347	LRRN4CL	SE_DGvsSShypermethylated_SE_DG
348	LSMD1	SE_DGvsSShypermethylated_SE_DG
349	LTBP3	SE_DGvsSShypermethylated_SE_DG
350	LY6D	EC_mNSvstype.I.TEhypermethylated_EC_mNS
351	LYNX1	SE_DGvsSShypermethylated_SE_DG
352	MACROD1	EC_mNSvstype.I.TEhypermethylated_EC_mNS
353	MADCAM1	EC_mNSvstype.I.TEhypermethylated_EC_mNS
354	MAGT1	EC_mNSvstype.I.TEhypermethylated_type.I.TE
355	MATN4	EC_mNSvstype.I.TEhypermethylated_EC_mNS
356	MCF2L	SE_DGvsSShypermethylated_SE_DG
357	MECP2	EC_mNSvstype.I.TEhypermethylated_type.I.TE
358	MEST	SE_DGvsSShypermethylated_SE_DG
359	MFSD2B	EC_mNSvstype.I.TEhypermethylated_EC_mNS
360	MGST1	EC_mNSvstype.I.TEhypermethylated_EC_mNS
361	MIB2	EC_mNSvstype.I.TEhypermethylated_EC_mNS
362	MIR1224	SE_DGvsSShypermethylated_SE_DG
363	MIR152	EC_mNSvstype.I.TEhypermethylated_EC_mNS
364	MIR338	SE_DGvsSShypermethylated_SE_DG
365	MIR4519	SE_DGvsSShypermethylated_SE_DG
366	MIR4526	SE_DGvsSShypermethylated_SE_DG
367	MIR657	SE_DGvsSShypermethylated_SE_DG
368	MIR762	SE_DGvsSShypermethylated_SE_DG
369	MOK	SE_DGvsSShypermethylated_SE_DG
370	MOV10L1	EC_mNSvstype.I.TEhypermethylated_EC_mNS; SE_DGvsSShypermethylated_SE_DG
371	MPRIP	SE_DGvsSShypermethylated_SE_DG
372	MPV17	EC_mNSvstype.I.TEhypermethylated_EC_mNS
373	MRGPRF	EC_mNSvstype.I.TEhypermethylated_EC_mNS
374	MRPL18	SE_DGvsSShypermethylated_SE_DG
375	MRVI1	EC_mNSvstype.I.TEhypermethylated_EC_mNS
376	MSH5	EC_mNSvstype.I.TEhypermethylated_EC_mNS; SE_DGvsSShypermethylated_SS
377	MSH5-SAPCD1	EC_mNSvstype.I.TEhypermethylated_EC_mNS; SE_DGvsSShypermethylated_SS
378	MSLN	EC_mNSvstype.I.TEhypermethylated_EC_mNS
379	MSLNL	EC_mNSvstype.I.TEhypermethylated_EC_mNS
380	MTCP1	EC_mNSvstype.I.TEhypermethylated_type.I.TE
381	MTMR1	EC_mNSvstype.I.TEhypermethylated_type.I.TE
382	MTNR1A	EC_mNSvstype.I.TEhypermethylated_EC_mNS
383	MUC6	EC_mNSvstype.I.TEhypermethylated_EC_mNS
384	MYO1C	SE_DGvsSShypermethylated_SE_DG
385	MYOD1	EC_mNSvstype.I.TEhypermethylated_EC_mNS
386	MYT1	SE_DGvsSShypermethylated_SE_DG
387	NAE1	EC_mNSvstype.I.TEhypermethylated_EC_mNS; SE_DGvsSShypermethylated_SE_DG
388	NAPRT1	EC_mNSvstype.I.TEhypermethylated_EC_mNS
389	NBPF13P	EC_mNSvstype.I.TEhypermethylated_EC_mNS
390	NCOR2	EC_mNSvstype.I.TEhypermethylated_EC_mNS; SE_DGvsSShypermethylated_SE_DG; SE_DGvstype.I.TEhypermethylated_SE_DG
391	NDUFA1	EC_mNSvstype.I.TEhypermethylated_type.I.TE
392	NDUFB8	EC_mNSvstype.I.TEhypermethylated_EC_mNS
393	NEURL3	SE_DGvsSShypermethylated_SE_DG
394	NEUROD2	EC_mNSvstype.I.TEhypermethylated_EC_mNS
395	NFIC	SE_DGvsSShypermethylated_SE_DG
396	NFIX	EC_mNSvstype.I.TEhypermethylated_EC_mNS
397	NHSL1	EC_mNSvstype.I.TEhypermethylated_EC_mNS; SE_DGvsSShypermethylated_SE_DG
398	NKX2-1	EC_mNSvstype.I.TEhypermethylated_EC_mNS
399	NKX2-5	EC_mNSvstype.I.TEhypermethylated_EC_mNS
400	NKX2-6	EC_mNSvstype.I.TEhypermethylated_EC_mNS
401	NKX6-2	EC_mNSvstype.I.TEhypermethylated_EC_mNS; SE_DGvsSShypermethylated_SE_DG
402	NKX6-3	SE_DGvsSShypermethylated_SE_DG
403	NLGN2	SE_DGvsSShypermethylated_SE_DG
404	NMD3	EC_mNSvstype.I.TEhypermethylated_EC_mNS
405	NNAT	SE_DGvsSShypermethylated_SE_DG
406	NOTCH4	EC_mNSvstype.I.TEhypermethylated_EC_mNS; SE_DGvsSShypermethylated_SE_DG
407	NOX4	EC_mNSvstype.I.TEhypermethylated_EC_mNS
408	NPB	EC_mNSvstype.I.TEhypermethylated_EC_mNS
409	NPY4R	EC_mNSvstype.I.TEhypermethylated_EC_mNS
410	NR1H3	EC_mNSvstype.I.TEhypermethylated_EC_mNS
411	NR2F2	EC_mNSvstype.I.TEhypermethylated_EC_mNS
412	NRXN2	EC_mNSvstype.I.TEhypermethylated_EC_mNS
413	NT5C1A	EC_mNSvstype.I.TEhypermethylated_EC_mNS
414	NUMA1	EC_mNSvstype.I.TEhypermethylated_EC_mNS
415	OGT	SE_DGvsSShypermethylated_SE_DG
416	OLIG2	EC_mNSvstype.I.TEhypermethylated_EC_mNS
417	ONECUT1	EC_mNSvstype.I.TEhypermethylated_EC_mNS
418	OPRL1	SE_DGvsSShypermethylated_SE_DG
419	OTOP2	EC_mNSvstype.I.TEhypermethylated_EC_mNS
420	OTUB1	SE_DGvsSShypermethylated_SE_DG
421	OTUD5	EC_mNSvstype.I.TEhypermethylated_type.I.TE
422	P4HA2	EC_mNSvstype.I.TEhypermethylated_EC_mNS
423	PAK6	SE_DGvsSShypermethylated_SE_DG
424	PANK4	EC_mNSvstype.I.TEhypermethylated_EC_mNS
425	PAQR4	SE_DGvsSShypermethylated_SE_DG
426	PAQR9	SE_DGvsSShypermethylated_SE_DG
427	PAX1	EC_mNSvstype.I.TEhypermethylated_EC_mNS
428	PAX3	EC_mNSvstype.I.TEhypermethylated_EC_mNS
429	PCDH8	EC_mNSvstype.I.TEhypermethylated_EC_mNS
430	PCDHB3	SE_DGvsSShypermethylated_SE_DG
431	PCSK2	EC_mNSvstype.I.TEhypermethylated_EC_mNS
432	PCYT1B	EC_mNSvstype.I.TEhypermethylated_type.I.TE
433	PCYT2	EC_mNSvstype.I.TEhypermethylated_EC_mNS
434	PDE6B	EC_mNSvstype.I.TEhypermethylated_EC_mNS
435	PDLIM4	EC_mNSvstype.I.TEhypermethylated_EC_mNS
436	PDX1	EC_mNSvstype.I.TEhypermethylated_EC_mNS
437	PDX1-AS1	EC_mNSvstype.I.TEhypermethylated_EC_mNS
438	PENK	EC_mNSvstype.I.TEhypermethylated_EC_mNS
439	PEX10	SE_DGvsSShypermethylated_SE_DG
440	PEX26	EC_mNSvstype.I.TEhypermethylated_EC_mNS
441	PHF1	SE_DGvsSShypermethylated_SE_DG
442	PHYHIP	EC_mNSvstype.I.TEhypermethylated_EC_mNS
443	PIK3R1	SE_DGvsSShypermethylated_SE_DG
444	PIM2	EC_mNSvstype.I.TEhypermethylated_type.I.TE
445	PIR	EC_mNSvstype.I.TEhypermethylated_type.I.TE
446	PIWIL1	SE_DGvsSShypermethylated_SE_DG
447	PIWIL2	SE_DGvsSShypermethylated_SE_DG
448	PIWIL4	SE_DGvsSShypermethylated_SE_DG
449	PKMYT1	SE_DGvsSShypermethylated_SE_DG
450	PKP1	EC_mNSvstype.I.TEhypermethylated_EC_mNS
451	PLCL2	SE_DGvsSShypermethylated_SE_DG
452	PLD6	SE_DGvsSShypermethylated_SE_DG
453	PLEC	EC_mNSvstype.I.TEhypermethylated_EC_mNS
454	PLEKHG4B	EC_mNSvstype.I.TEhypermethylated_EC_mNS
455	PLEKHG5	EC_mNSvstype.I.TEhypermethylated_EC_mNS; SE_DGvsSShypermethylated_SE_DG
456	PLXDC1	EC_mNSvstype.I.TEhypermethylated_EC_mNS
457	PNKP	SE_DGvsSShypermethylated_SE_DG
458	PNPO	EC_mNSvstype.I.TEhypermethylated_EC_mNS
459	PON1	EC_mNSvstype.I.TEhypermethylated_type.I.TE
460	PON3	EC_mNSvstype.I.TEhypermethylated_type.I.TE
461	POU4F3	EC_mNSvstype.I.TEhypermethylated_EC_mNS
462	POU5F1	SE_DGvsSShypermethylated_SE_DG
463	PPAP2C	SE_DGvsSShypermethylated_SE_DG
464	PPP1R11	SE_DGvsSShypermethylated_SE_DG
465	PPT2	EC_mNSvstype.I.TEhypermethylated_EC_mNS; SE_DGvsSShypermethylated_SE_DG
466	PPT2-EGFL8	EC_mNSvstype.I.TEhypermethylated_EC_mNS; SE_DGvsSShypermethylated_SE_DG
467	PQBP1	EC_mNSvstype.I.TEhypermethylated_type.I.TE
468	PRAME	SE_DGvsSShypermethylated_SE_DG
469	PRDM16	EC_mNSvstype.I.TEhypermethylated_EC_mNS; SE_DGvsSShypermethylated_SE_DG
470	PRLHR	EC_mNSvstype.I.TEhypermethylated_EC_mNS
471	PROSER2	SE_DGvsSShypermethylated_SE_DG
472	PRPS2	EC_mNSvstype.I.TEhypermethylated_type.I.TE
473	PRR15	EC_mNSvstype.I.TEhypermethylated_EC_mNS
474	PRRT1	EC_mNSvstype.I.TEhypermethylated_EC_mNS; SE_DGvsSShypermethylated_SE_DG
475	PRSS22	SE_DGvsSShypermethylated_SE_DG
476	PSMB9	EC_mNSvstype.I.TEhypermethylated_type.I.TE
477	PTF1A	EC_mNSvstype.I.TEhypermethylated_EC_mNS
478	PTH2	EC_mNSvstype.I.TEhypermethylated_EC_mNS
479	PTH2R	SE_DGvsSShypermethylated_SE_DG
480	PTPRN2	EC_mNSvstype.I.TEhypermethylated_EC_mNS; SE_DGvsSShypermethylated_SE_DG
481	RAB19	SE_DGvsSShypermethylated_SS
482	RAC2	SE_DGvsSShypermethylated_SS
483	RAET1L	EC_mNSvstype.I.TEhypermethylated_EC_mNS
484	RASA3	EC_mNSvstype.I.TEhypermethylated_EC_mNS; SE_DGvsSShypermethylated_SE_DG
485	RASGEF1C	SE_DGvsSShypermethylated_SE_DG
486	RASL10A	SE_DGvsSShypermethylated_SE_DG
487	RASSF1	EC_mNSvstype.I.TEhypermethylated_EC_mNS
488	RBM27	EC_mNSvstype.I.TEhypermethylated_EC_mNS
489	RBPJL	EC_mNSvstype.I.TEhypermethylated_EC_mNS
490	REM1	EC_mNSvstype.I.TEhypermethylated_EC_mNS; SE_DGvsSShypermethylated_SE_DG
491	RIN2	EC_mNSvstype.I.TEhypermethylated_EC_mNS
492	RNA5SP206	EC_mNSvstype.I.TEhypermethylated_EC_mNS
493	RNF113A	EC_mNSvstype.I.TEhypermethylated_type.I.TE
494	RNF39	SE_DGvsSShypermethylated_SE_DG
495	RNU1-20P	EC_mNSvstype.I.TEhypermethylated_EC_mNS
496	RNU6-722P	EC_mNSvstype.I.TEhypermethylated_type.I.TE
497	ROBO1	EC_mNSvstype.I.TEhypermethylated_EC_mNS
498	RP1-170O19.22	SE_DGvsSShypermethylated_SE_DG
499	RP1-170O19.23	SE_DGvsSShypermethylated_SE_DG
500	RP1-28O10.1	EC_mNSvstype.I.TEhypermethylated_EC_mNS
501	RP11-1029J19.2	EC_mNSvstype.I.TEhypermethylated_EC_mNS
502	RP11-1055B8.7	EC_mNSvstype.I.TEhypermethylated_EC_mNS; SE_DGvsSShypermethylated_SE_DG
503	RP11-1081L13.4	EC_mNSvstype.I.TEhypermethylated_EC_mNS
504	RP11-1099M24.7	EC_mNSvstype.I.TEhypermethylated_EC_mNS
505	RP11-109I13.2	SE_DGvsSShypermethylated_SE_DG
506	RP11-133K1.2	SE_DGvsSShypermethylated_SE_DG
507	RP11-158J3.2	EC_mNSvstype.I.TEhypermethylated_EC_mNS
508	RP11-168L22.2	EC_mNSvstype.I.TEhypermethylated_EC_mNS
509	RP11-175E9.1	EC_mNSvstype.I.TEhypermethylated_EC_mNS
510	RP11-175K6.1	SE_DGvsSShypermethylated_SE_DG
511	RP11-17A4.2	EC_mNSvstype.I.TEhypermethylated_EC_mNS
512	RP11-215A19.2	EC_mNSvstype.I.TEhypermethylated_EC_mNS
513	RP11-21A7A.2	EC_mNSvstype.I.TEhypermethylated_EC_mNS
514	RP11-225H22.4	EC_mNSvstype.I.TEhypermethylated_EC_mNS
515	RP11-225H22.7	EC_mNSvstype.I.TEhypermethylated_EC_mNS
516	RP11-25O3.1	EC_mNSvstype.I.TEhypermethylated_EC_mNS
517	RP11-260M19.2	EC_mNSvstype.I.TEhypermethylated_EC_mNS
518	RP11-288G11.3	EC_mNSvstype.I.TEhypermethylated_EC_mNS; SE_DGvsSShypermethylated_SE_DG
519	RP11-290M5.4	SE_DGvsSShypermethylated_SE_DG
520	RP11-295K3.1	SE_DGvsSShypermethylated_SE_DG
521	RP11-2E17.1	SE_DGvsSShypermethylated_SE_DG
522	RP11-310P5.2	EC_mNSvstype.I.TEhypermethylated_EC_mNS
523	RP11-318C2.1	SE_DGvsSShypermethylated_SE_DG
524	RP11-31L23.3	EC_mNSvstype.I.TEhypermethylated_EC_mNS
525	RP11-382A20.4	EC_mNSvstype.I.TEhypermethylated_EC_mNS
526	RP11-445F12.1	EC_mNSvstype.I.TEhypermethylated_EC_mNS
527	RP11-457P14.5	EC_mNSvstype.I.TEhypermethylated_EC_mNS; SE_DGvsSShypermethylated_SE_DG
528	RP11-45M22.4	SE_DGvsSShypermethylated_SE_DG
529	RP11-523H20.3	EC_mNSvstype.I.TEhypermethylated_EC_mNS
530	RP11-544M22.13	EC_mNSvstype.I.TEhypermethylated_type.I.TE
531	RP11-554A11.6	EC_mNSvstype.I.TEhypermethylated_EC_mNS
532	RP11-589P10.5	SE_DGvsSShypermethylated_SE_DG; SE_DGvstype.I.TEhypermethylated_SE_DG
533	RP11-589P10.7	SE_DGvsSShypermethylated_SE_DG; SE_DGvstype.I.TEhypermethylated_SE_DG
534	RP11-61A14.1	EC_mNSvstype.I.TEhypermethylated_EC_mNS
535	RP11-637O19.2	EC_mNSvstype.I.TEhypermethylated_EC_mNS
536	RP11-637O19.3	EC_mNSvstype.I.TEhypermethylated_EC_mNS
537	RP11-641A6.2	SE_DGvsSShypermethylated_SE_DG
538	RP11-648F7.1	SE_DGvsSShypermethylated_SE_DG
539	RP11-661A12.9	EC_mNSvstype.I.TEhypermethylated_EC_mNS
540	RP11-672L10.2	EC_mNSvstype.I.TEhypermethylated_EC_mNS
541	RP11-672L10.3	EC_mNSvstype.I.TEhypermethylated_EC_mNS
542	RP11-691N7.6	SE_DGvsSShypermethylated_SE_DG
543	RP11-706C16.8	EC_mNSvstype.I.TEhypermethylated_EC_mNS
544	RP11-71E19.5	EC_mNSvstype.I.TEhypermethylated_EC_mNS
545	RP11-739P1.2	SE_DGvsSShypermethylated_SE_DG
546	RP11-744N12.3	SE_DGvsSShypermethylated_SE_DG
547	RP11-867G2.8	SE_DGvsSShypermethylated_SE_DG
548	RP11-896J10.3	EC_mNSvstype.I.TEhypermethylated_EC_mNS
549	RP11-89K21.1	EC_mNSvstype.I.TEhypermethylated_EC_mNS
550	RP11-93B14.5	EC_mNSvstype.I.TEhypermethylated_EC_mNS
551	RP11-945C19.4	SE_DGvsSShypermethylated_SE_DG
552	RP13-895J2.7	EC_mNSvstype.I.TEhypermethylated_EC_mNS
553	RP3-339A18.6	EC_mNSvstype.I.TEhypermethylated_type.I.TE
554	RP3-423B22.5	SE_DGvsSShypermethylated_SE_DG
555	RP5-1022P6.7	SE_DGvsSShypermethylated_SE_DG
556	RPL10	EC_mNSvstype.I.TEhypermethylated_type.I.TE
557	RPL13P	SE_DGvsSShypermethylated_SE_DG
558	RPL32P1	EC_mNSvstype.I.TEhypermethylated_EC_mNS
559	RPS6KA4	SE_DGvsSShypermethylated_SE_DG
560	RPUSD1	EC_mNSvstype.I.TEhypermethylated_EC_mNS
561	S100A5	EC_mNSvstype.I.TEhypermethylated_EC_mNS
562	S100A6	EC_mNSvstype.I.TEhypermethylated_EC_mNS
563	SAMD11	SE_DGvsSShypermethylated_SE_DG
564	SAPCD1	EC_mNSvstype.I.TEhypermethylated_EC_mNS
565	SAPCD1-AS1	EC_mNSvstype.I.TEhypermethylated_EC_mNS
566	SBNO2	EC_mNSvstype.I.TEhypermethylated_EC_mNS; SE_DGvsSShypermethylated_SE_DG
567	SCAND3	EC_mNSvstype.I.TEhypermethylated_type.I.TE
568	SCIN	EC_mNSvstype.I.TEhypermethylated_EC_mNS
569	SEC14L1	EC_mNSvstype.I.TEhypermethylated_EC_mNS
570	SEC31B	EC_mNSvstype.I.TEhypermethylated_EC_mNS
571	SENCR	SE_DGvsSShypermethylated_SE_DG
572	SERPINE1	SE_DGvsSShypermethylated_SS
573	SERPING1	EC_mNSvstype.I.TEhypermethylated_EC_mNS
574	SF3B2	EC_mNSvstype.I.TEhypermethylated_EC_mNS
575	SFRP1	EC_mNSvstype.I.TEhypermethylated_EC_mNS
576	SFTA3	EC_mNSvstype.I.TEhypermethylated_EC_mNS
577	SHANK1	EC_mNSvstype.I.TEhypermethylated_EC_mNS
578	SHANK2	SE_DGvsSShypermethylated_SE_DG
579	SHISA4	EC_mNSvstype.I.TEhypermethylated_EC_mNS
580	SIAH3	EC_mNSvstype.I.TEhypermethylated_EC_mNS
581	SIGLEC12	SE_DGvsSShypermethylated_SS
582	SIM1	EC_mNSvstype.I.TEhypermethylated_EC_mNS
583	SIM2	EC_mNSvstype.I.TEhypermethylated_EC_mNS
584	SIX3	EC_mNSvstype.I.TEhypermethylated_EC_mNS
585	SIX3-AS1	EC_mNSvstype.I.TEhypermethylated_EC_mNS
586	SKIV2L	SE_DGvsSShypermethylated_SE_DG
587	SLC10A3	EC_mNSvstype.I.TEhypermethylated_type.I.TE
588	SLC12A4	EC_mNSvstype.I.TEhypermethylated_EC_mNS
589	SLC16A11	EC_mNSvstype.I.TEhypermethylated_EC_mNS
590	SLC16A13	EC_mNSvstype.I.TEhypermethylated_EC_mNS
591	SLC16A8	SE_DGvsSShypermethylated_SE_DG
592	SLC18A3	EC_mNSvstype.I.TEhypermethylated_EC_mNS
593	SLC22A18	EC_mNSvstype.I.TEhypermethylated_EC_mNS
594	SLC22A18AS	EC_mNSvstype.I.TEhypermethylated_EC_mNS
595	SLC23A1	SE_DGvsSShypermethylated_SE_DG
596	SLC2A9	EC_mNSvstype.I.TEhypermethylated_EC_mNS
597	SLC35A2	EC_mNSvstype.I.TEhypermethylated_type.I.TE
598	SLC35C1	EC_mNSvstype.I.TEhypermethylated_EC_mNS
599	SLC37A3	SE_DGvsSShypermethylated_SS
600	SLC38A4	EC_mNSvstype.I.TEhypermethylated_EC_mNS
601	SLC44A4	EC_mNSvstype.I.TEhypermethylated_EC_mNS
602	SLC6A1	SE_DGvsSShypermethylated_SS
603	SLC6A1-AS1	SE_DGvsSShypermethylated_SS
604	SLC6A4	EC_mNSvstype.I.TEhypermethylated_EC_mNS
605	SLC9A3	EC_mNSvstype.I.TEhypermethylated_EC_mNS
606	SLCO4A1	EC_mNSvstype.I.TEhypermethylated_EC_mNS
607	SLFN12L	EC_mNSvstype.I.TEhypermethylated_EC_mNS
608	SLFN13	EC_mNSvstype.I.TEhypermethylated_EC_mNS
609	SNORA70	EC_mNSvstype.I.TEhypermethylated_type.I.TE
610	snoU13	SE_DGvsSShypermethylated_SE_DG
611	SOHLH2	EC_mNSvstype.I.TEhypermethylated_EC_mNS
612	SORBS2	SE_DGvsSShypermethylated_SE_DG
613	SOX2	EC_mNSvstype.I.TEhypermethylated_type.I.TE
614	SOX2-OT	EC_mNSvstype.I.TEhypermethylated_type.I.TE
615	SOX30	SE_DGvsSShypermethylated_SE_DG
616	SPDEF	EC_mNSvstype.I.TEhypermethylated_EC_mNS
617	SPIB	EC_mNSvstype.I.TEhypermethylated_EC_mNS
618	SPICE1	SE_DGvsSShypermethylated_SE_DG
619	SPIDR	SE_DGvsSShypermethylated_SE_DG
620	SPOCK2	EC_mNSvstype.I.TEhypermethylated_EC_mNS
621	SPON2	EC_mNSvstype.I.TEhypermethylated_EC_mNS; SE_DGvsSShypermethylated_SE_DG
622	SPRED3	SE_DGvsSShypermethylated_SE_DG
623	SSR4	EC_mNSvstype.I.TEhypermethylated_type.I.TE
624	ST5	SE_DGvsSShypermethylated_SE_DG
625	STAMBPL1	EC_mNSvstype.I.TEhypermethylated_EC_mNS
626	STK19	SE_DGvsSShypermethylated_SE_DG
627	STOX2	SE_DGvsSShypermethylated_SE_DG
628	SUGT1P3	SE_DGvsSShypermethylated_SE_DG
629	SYCP2L	EC_mNSvstype.I.TEhypermethylated_EC_mNS
630	SYNE1	EC_mNSvstype.I.TEhypermethylated_EC_mNS
631	SYNE1-AS1	EC_mNSvstype.I.TEhypermethylated_EC_mNS
632	SYNGAP1	EC_mNSvstype.I.TEhypermethylated_EC_mNS; SE_DGvsSShypermethylated_SE_DG
633	SYT3	EC_mNSvstype.I.TEhypermethylated_EC_mNS
634	TAP1	EC_mNSvstype.I.TEhypermethylated_type.I.TE
635	TAPBP	SE_DGvsSShypermethylated_SE_DG
636	TBC1D16	SE_DGvsSShypermethylated_SE_DG
637	TBC1D25	EC_mNSvstype.I.TEhypermethylated_type.I.TE
638	TBX1	EC_mNSvstype.I.TEhypermethylated_EC_mNS
639	TBX15	EC_mNSvstype.I.TEhypermethylated_EC_mNS
640	TBX18	EC_mNSvstype.I.TEhypermethylated_EC_mNS
641	TEF	EC_mNSvstype.I.TEhypermethylated_EC_mNS
642	TFAP2B	EC_mNSvstype.I.TEhypermethylated_EC_mNS
643	THBS2	EC_mNSvstype.I.TEhypermethylated_EC_mNS
644	TIMM17B	EC_mNSvstype.I.TEhypermethylated_type.I.TE
645	TLX1	EC_mNSvstype.I.TEhypermethylated_EC_mNS
646	TLX1NB	EC_mNSvstype.I.TEhypermethylated_EC_mNS
647	TLX3	EC_mNSvstype.I.TEhypermethylated_EC_mNS
648	TM4SF2	EC_mNSvstype.I.TEhypermethylated_type.I.TE
649	TMCC1	EC_mNSvstype.I.TEhypermethylated_EC_mNS
650	TMEM132C	SE_DGvsSShypermethylated_SS
651	TMEM176A	EC_mNSvstype.I.TEhypermethylated_EC_mNS
652	TMEM176B	EC_mNSvstype.I.TEhypermethylated_EC_mNS
653	TMEM185A	EC_mNSvstype.I.TEhypermethylated_type.I.TE
654	TMEM190	EC_mNSvstype.I.TEhypermethylated_EC_mNS
655	TMEM200C	SE_DGvsSShypermethylated_SE_DG
656	TMEM45B	EC_mNSvstype.I.TEhypermethylated_EC_mNS
657	TMEM86A	EC_mNSvstype.I.TEhypermethylated_EC_mNS
658	TMEM88	SE_DGvsSShypermethylated_SE_DG
659	TMUB1	SE_DGvsSShypermethylated_SE_DG
660	TMX2-CTNND1	SE_DGvsSShypermethylated_SE_DG
661	TNFRSF11A	SE_DGvsSShypermethylated_SE_DG
662	TNK1	EC_mNSvstype.I.TEhypermethylated_EC_mNS
663	TNRC6C	SE_DGvsSShypermethylated_SE_DG
664	TNXB	EC_mNSvstype.I.TEhypermethylated_EC_mNS; SE_DGvsSShypermethylated_SE_DG; SE_DGvsSShypermethylated_SS
665	TP73	EC_mNSvstype.I.TEhypermethylated_EC_mNS
666	TPTE2P5	SE_DGvsSShypermethylated_SE_DG
667	TRAPPC1	EC_mNSvstype.I.TEhypermethylated_EC_mNS
668	TRAPPC12	SE_DGvsSShypermethylated_SE_DG
669	TREX2	EC_mNSvstype.I.TEhypermethylated_type.I.TE
670	TRIM15	SE_DGvsSShypermethylated_SE_DG
671	TRIM2	EC_mNSvstype.I.TEhypermethylated_EC_mNS
672	TRIM26	EC_mNSvstype.I.TEhypermethylated_EC_mNS
673	TRIM29	SE_DGvsSShypermethylated_SE_DG
674	TRIM54	EC_mNSvstype.I.TEhypermethylated_EC_mNS
675	TRPM5	SE_DGvsSShypermethylated_SE_DG
676	TSC22D3	EC_mNSvstype.I.TEhypermethylated_type.I.TE
677	TSC22D4	EC_mNSvstype.I.TEhypermethylated_EC_mNS
678	TSSC4	SE_DGvsSShypermethylated_SE_DG
679	TSTD1	EC_mNSvstype.I.TEhypermethylated_type.I.TE
680	TUBA8	EC_mNSvstype.I.TEhypermethylated_EC_mNS
681	TUBB	EC_mNSvstype.I.TEhypermethylated_EC_mNS; SE_DGvsSShypermethylated_SE_DG
682	UCN	EC_mNSvstype.I.TEhypermethylated_EC_mNS
683	UCN3	SE_DGvsSShypermethylated_SE_DG
684	USF1	EC_mNSvstype.I.TEhypermethylated_type.I.TE
685	USH1G	EC_mNSvstype.I.TEhypermethylated_EC_mNS
686	UTS2B	EC_mNSvstype.I.TEhypermethylated_EC_mNS
687	UXT	EC_mNSvstype.I.TEhypermethylated_type.I.TE
688	UXT-AS1	EC_mNSvstype.I.TEhypermethylated_type.I.TE
689	VARS	SE_DGvsSShypermethylated_SS
690	VENTX	EC_mNSvstype.I.TEhypermethylated_EC_mNS
691	VGLL2	EC_mNSvstype.I.TEhypermethylated_EC_mNS
692	VILL	EC_mNSvstype.I.TEhypermethylated_EC_mNS
693	VOPP1	SE_DGvsSShypermethylated_SE_DG
694	VSTM5	EC_mNSvstype.I.TEhypermethylated_EC_mNS
695	VSX1	EC_mNSvstype.I.TEhypermethylated_EC_mNS
696	VWA2	EC_mNSvstype.I.TEhypermethylated_EC_mNS
697	VWA5B2	SE_DGvsSShypermethylated_SE_DG
698	VWA7	EC_mNSvstype.I.TEhypermethylated_EC_mNS; SE_DGvsSShypermethylated_SS
699	WBP1L	EC_mNSvstype.I.TEhypermethylated_EC_mNS
700	WDR45	EC_mNSvstype.I.TEhypermethylated_type.I.TE
701	WDR46	SE_DGvsSShypermethylated_SE_DG
702	WDR52	SE_DGvsSShypermethylated_SE_DG
703	WFDC2	EC_mNSvstype.I.TEhypermethylated_EC_mNS
704	WI2-89031B12.1	EC_mNSvstype.I.TEhypermethylated_type.I.TE
705	WRAP73	SE_DGvsSShypermethylated_SE_DG
706	WT1	EC_mNSvstype.I.TEhypermethylated_EC_mNS
707	WT1-AS	EC_mNSvstype.I.TEhypermethylated_EC_mNS
708	XAF1	EC_mNSvstype.I.TEhypermethylated_EC_mNS; SE_DGvsSShypermethylated_SS
709	XXbac-BPG181M17.6	EC_mNSvstype.I.TEhypermethylated_EC_mNS
710	XXbac-BPG252P9.9	EC_mNSvstype.I.TEhypermethylated_EC_mNS
711	XXbac-BPG308K3.6	SE_DGvsSShypermethylated_SE_DG
712	Y_RNA	EC_mNSvstype.I.TEhypermethylated_type.I.TE; EC_mNSvstype.I.TEhypermethylated_EC_mNS; SE_DGvsSShypermethylated_SE_DG; SE_DGvsSShypermethylated_SS
713	YIPF6	EC_mNSvstype.I.TEhypermethylated_type.I.TE
714	YJEFN3	SE_DGvsSShypermethylated_SE_DG
715	ZACN	EC_mNSvstype.I.TEhypermethylated_EC_mNS
716	ZBTB22	SE_DGvsSShypermethylated_SE_DG
717	ZDHHC11	EC_mNSvstype.I.TEhypermethylated_EC_mNS
718	ZMYND10	EC_mNSvstype.I.TEhypermethylated_EC_mNS
719	ZMYND10-AS1	EC_mNSvstype.I.TEhypermethylated_EC_mNS
720	ZNF449	EC_mNSvstype.I.TEhypermethylated_type.I.TE
721	ZNF497	SE_DGvsSShypermethylated_SE_DG
722	ZNF511	EC_mNSvstype.I.TEhypermethylated_EC_mNS
723	ZNF674	EC_mNSvstype.I.TEhypermethylated_type.I.TE
724	ZNF674-AS1	EC_mNSvstype.I.TEhypermethylated_type.I.TE
725	ZNF75D	EC_mNSvstype.I.TEhypermethylated_type.I.TE
726	ZNF777	SE_DGvsSShypermethylated_SE_DG
727	ZNF81	EC_mNSvstype.I.TEhypermethylated_type.I.TE
728	ZNF876P	EC_mNSvstype.I.TEhypermethylated_EC_mNS
729	ZNRD1-AS1	EC_mNSvstype.I.TEhypermethylated_EC_mNS
